# Supplementary material for: Pan-cancer analyses of pyroptosis with functional implications for prognosis and immunotherapy in cancer
Source: Springer Nature journal article supplement (doi:10.1186/s12967-022-03313-x), 2022-03-04
Supplement: MOESM2 [file 20193556]

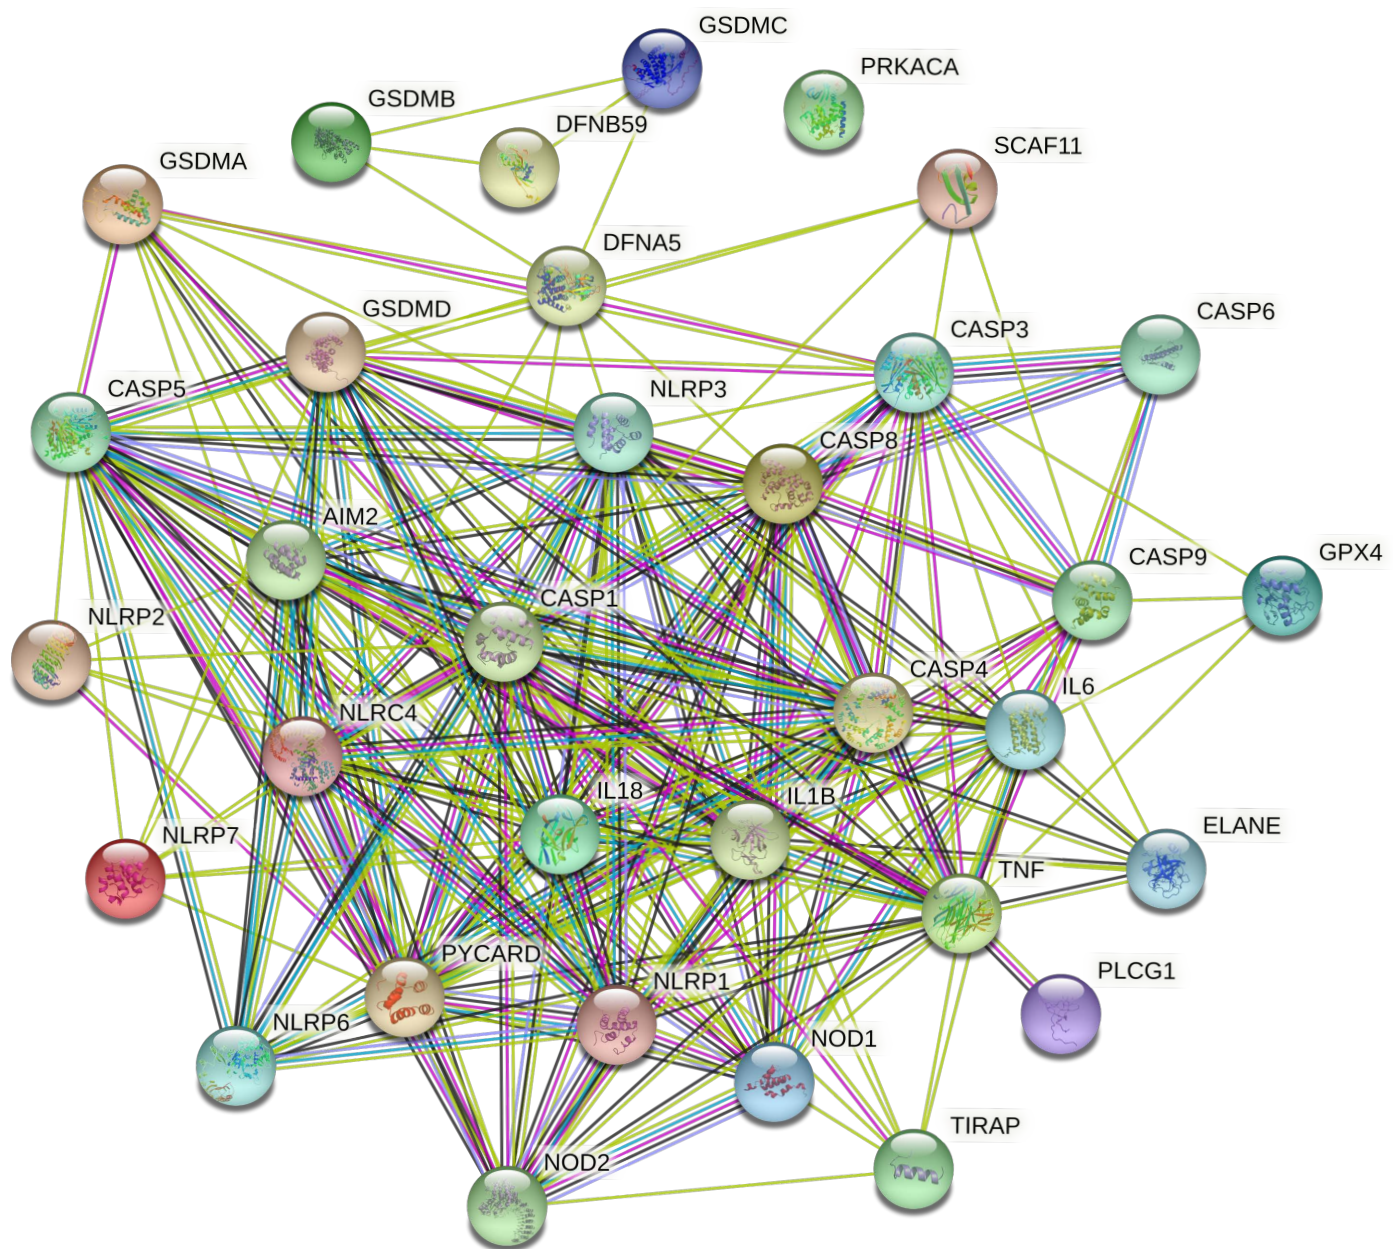

**Figure S1**

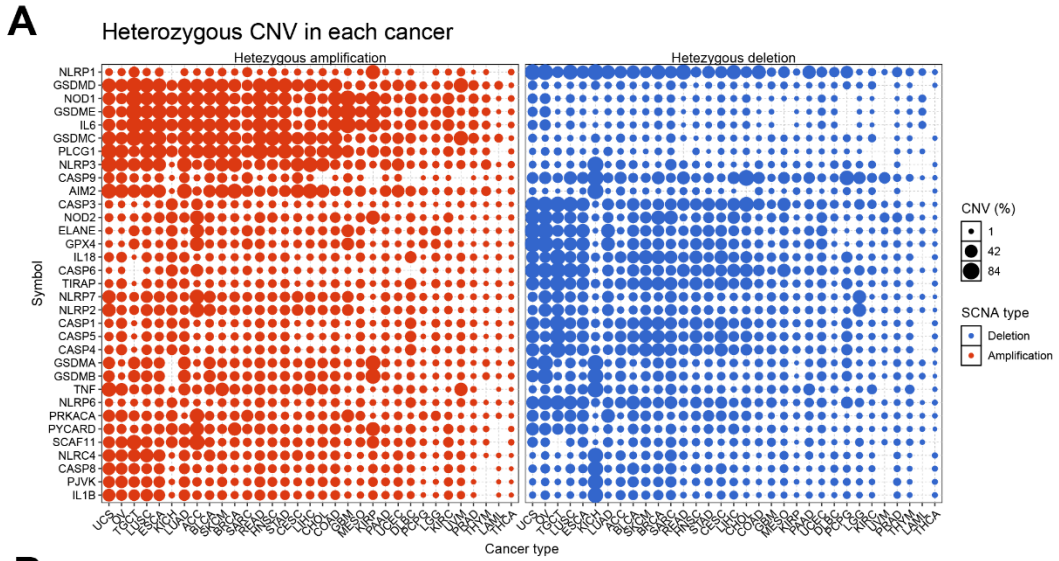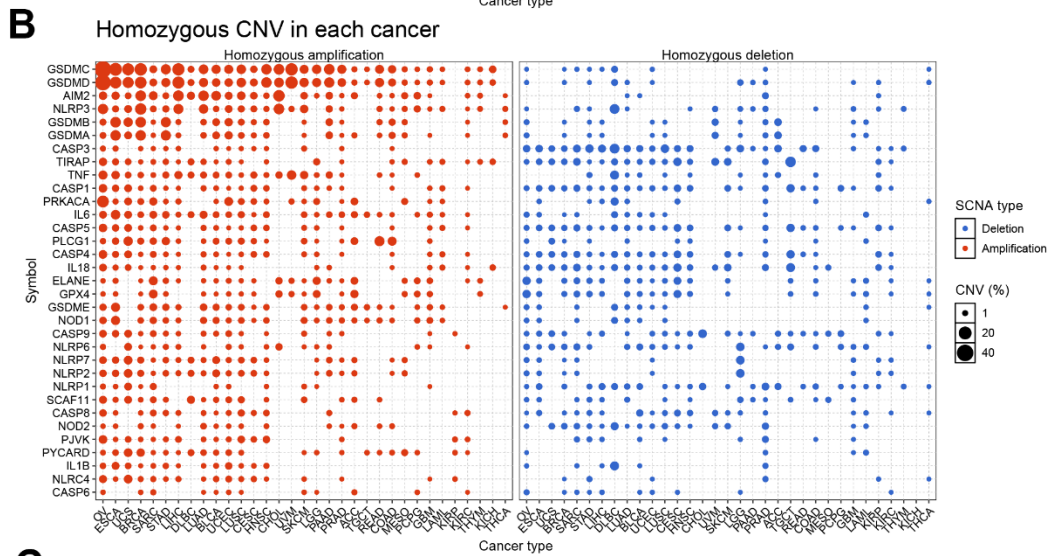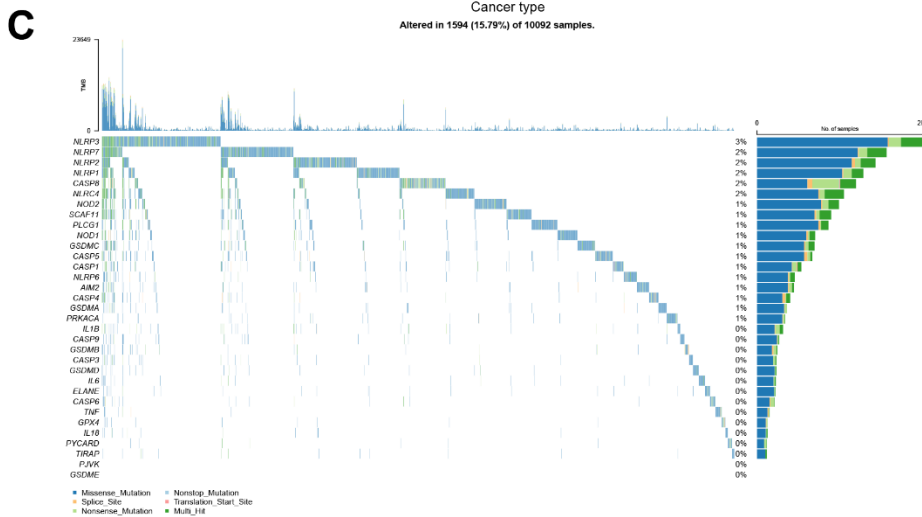

**Figure S2**

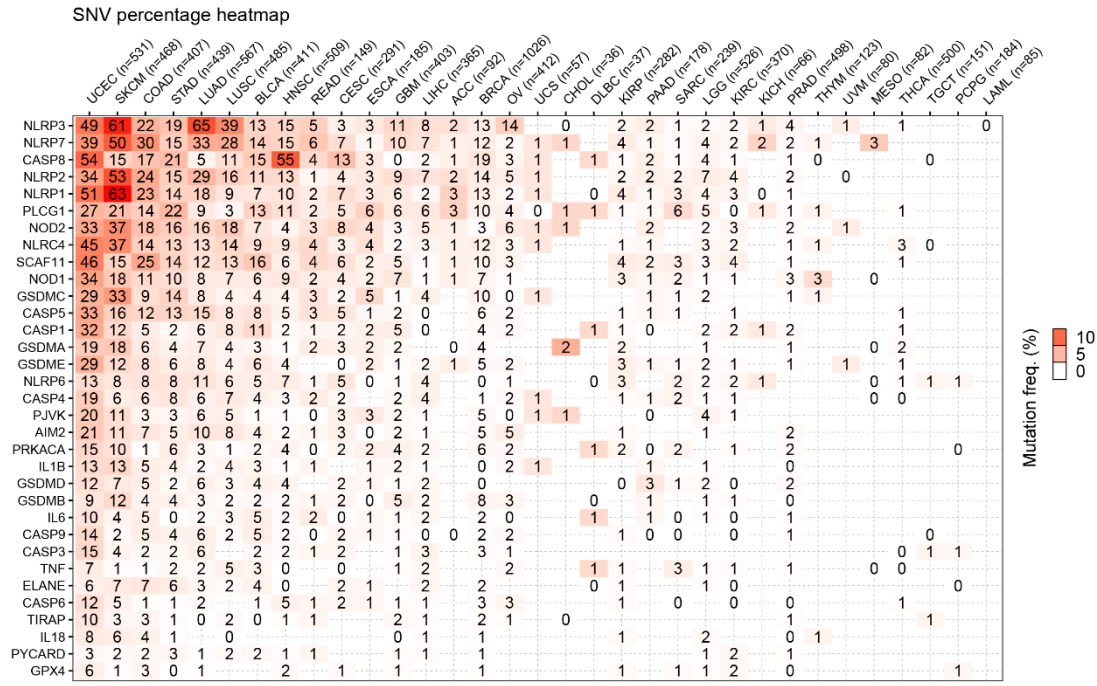

Figure S3

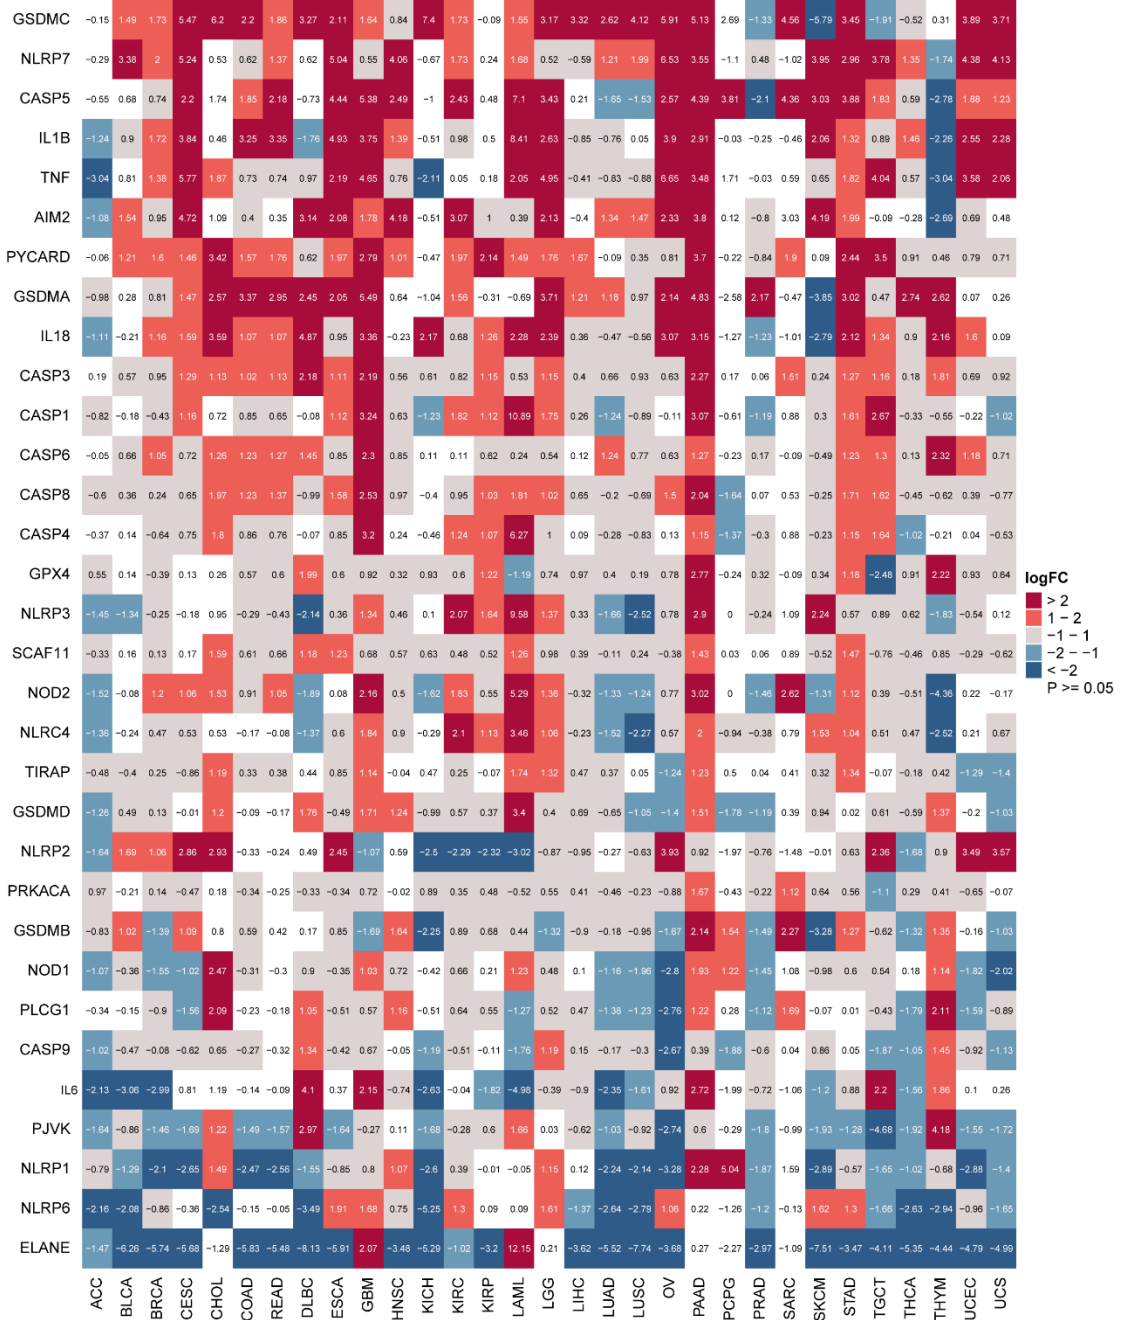

**Figure S4**

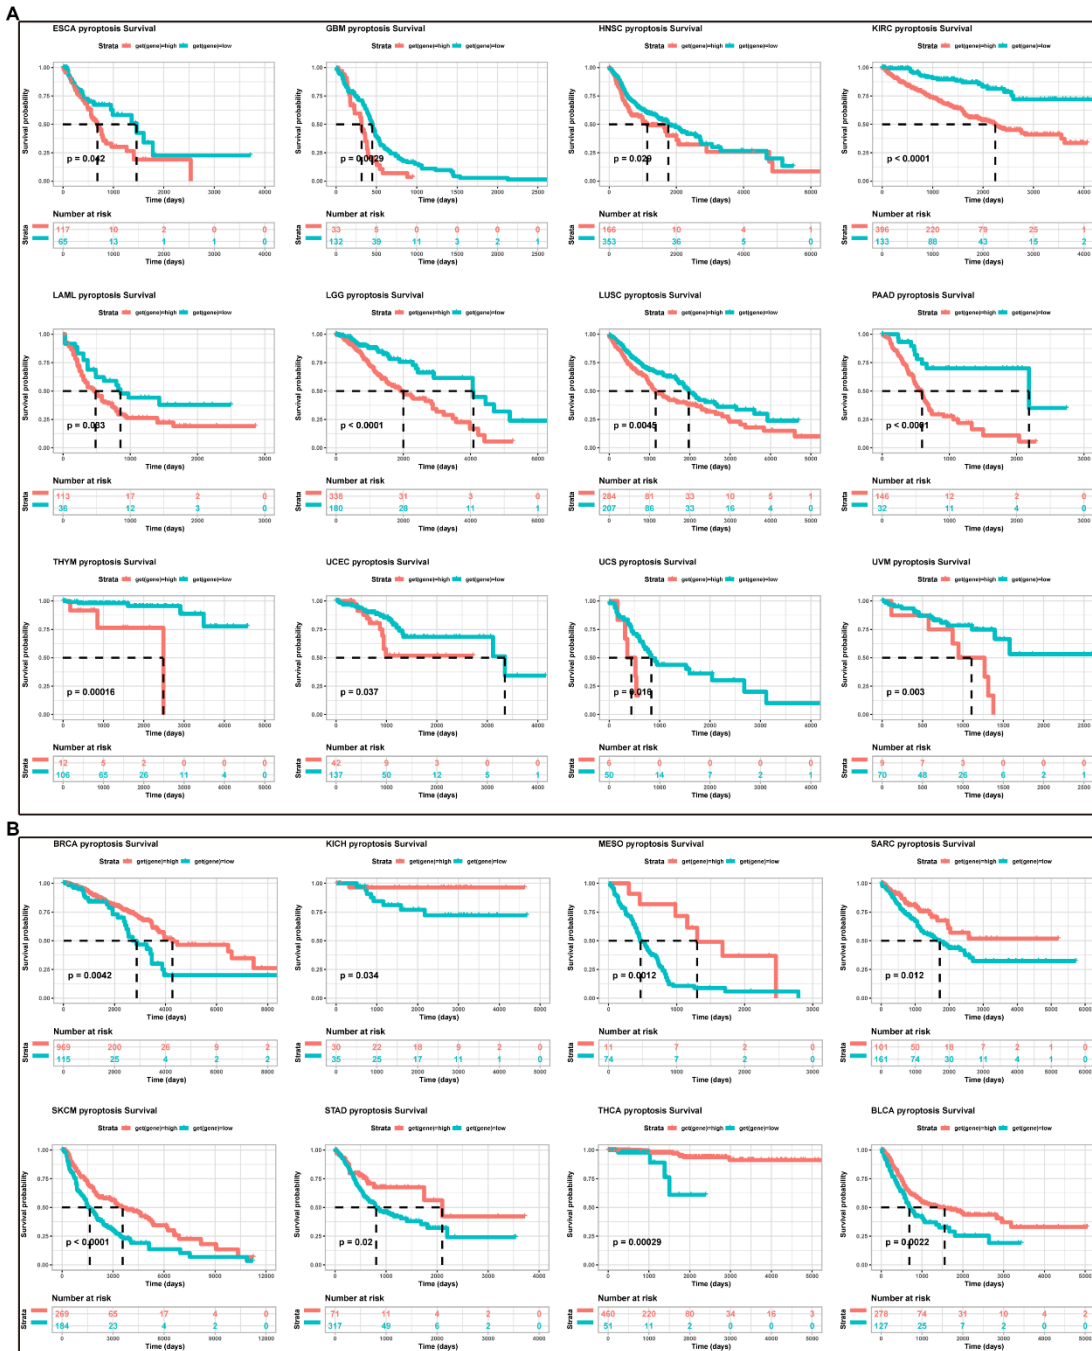

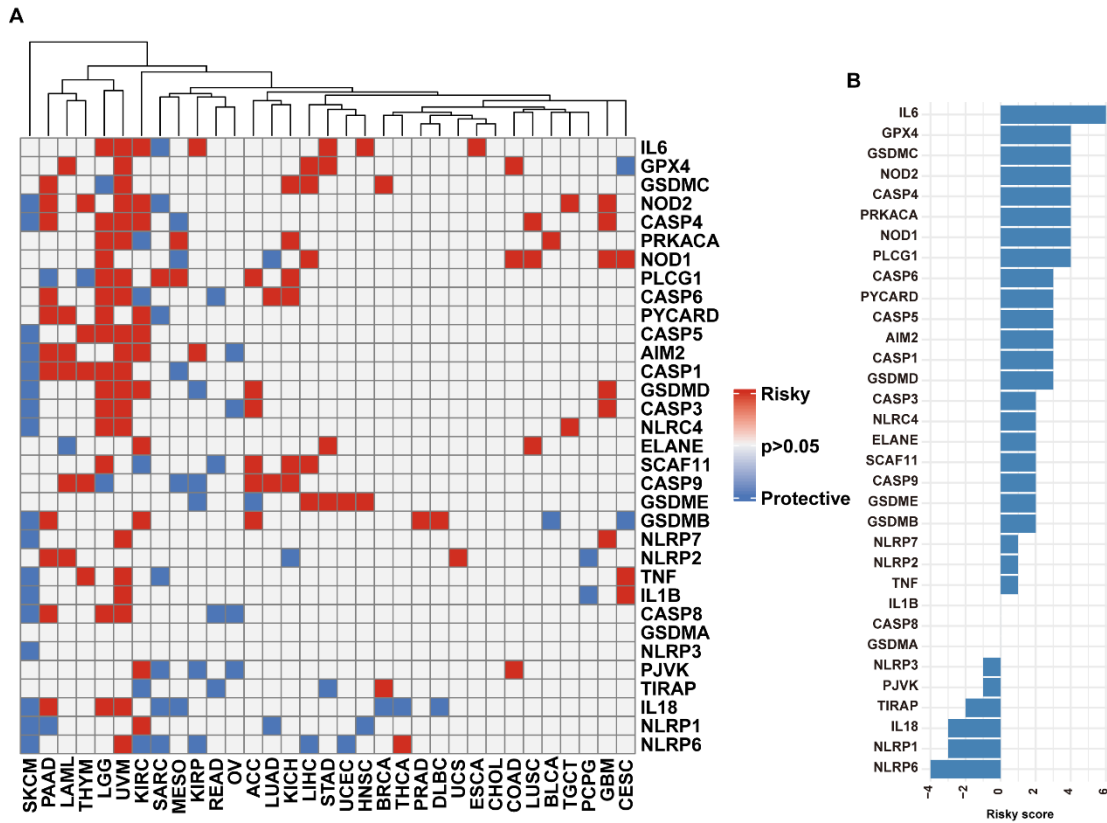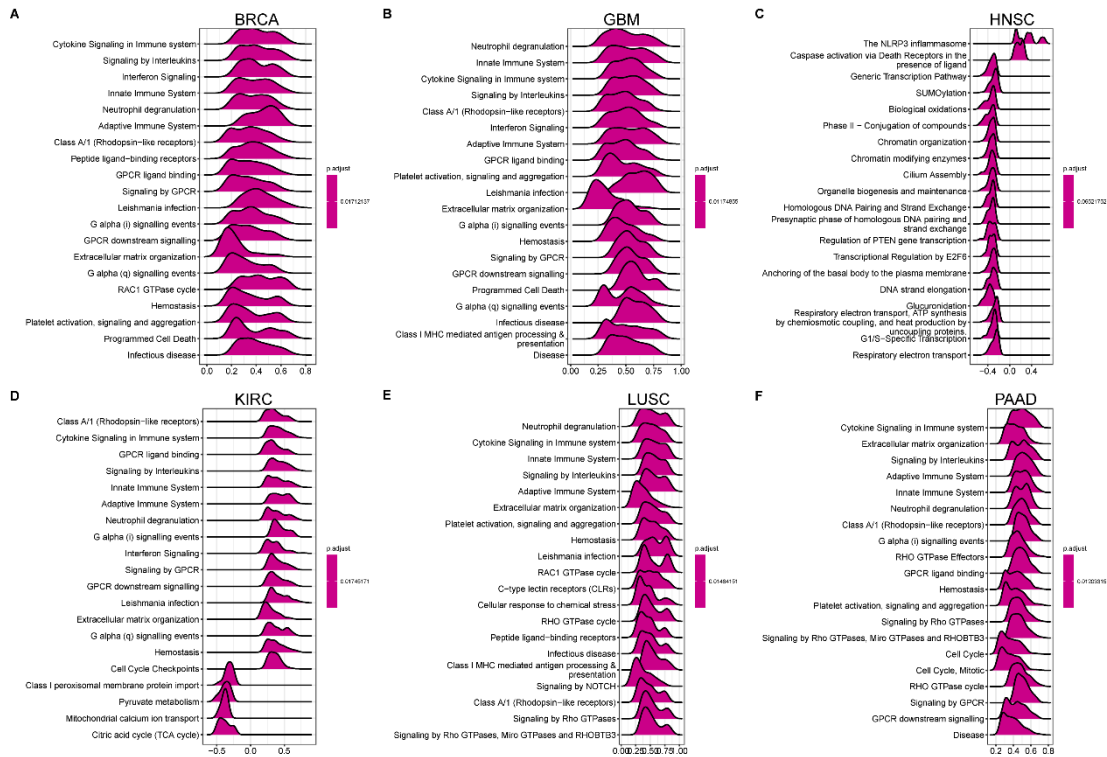

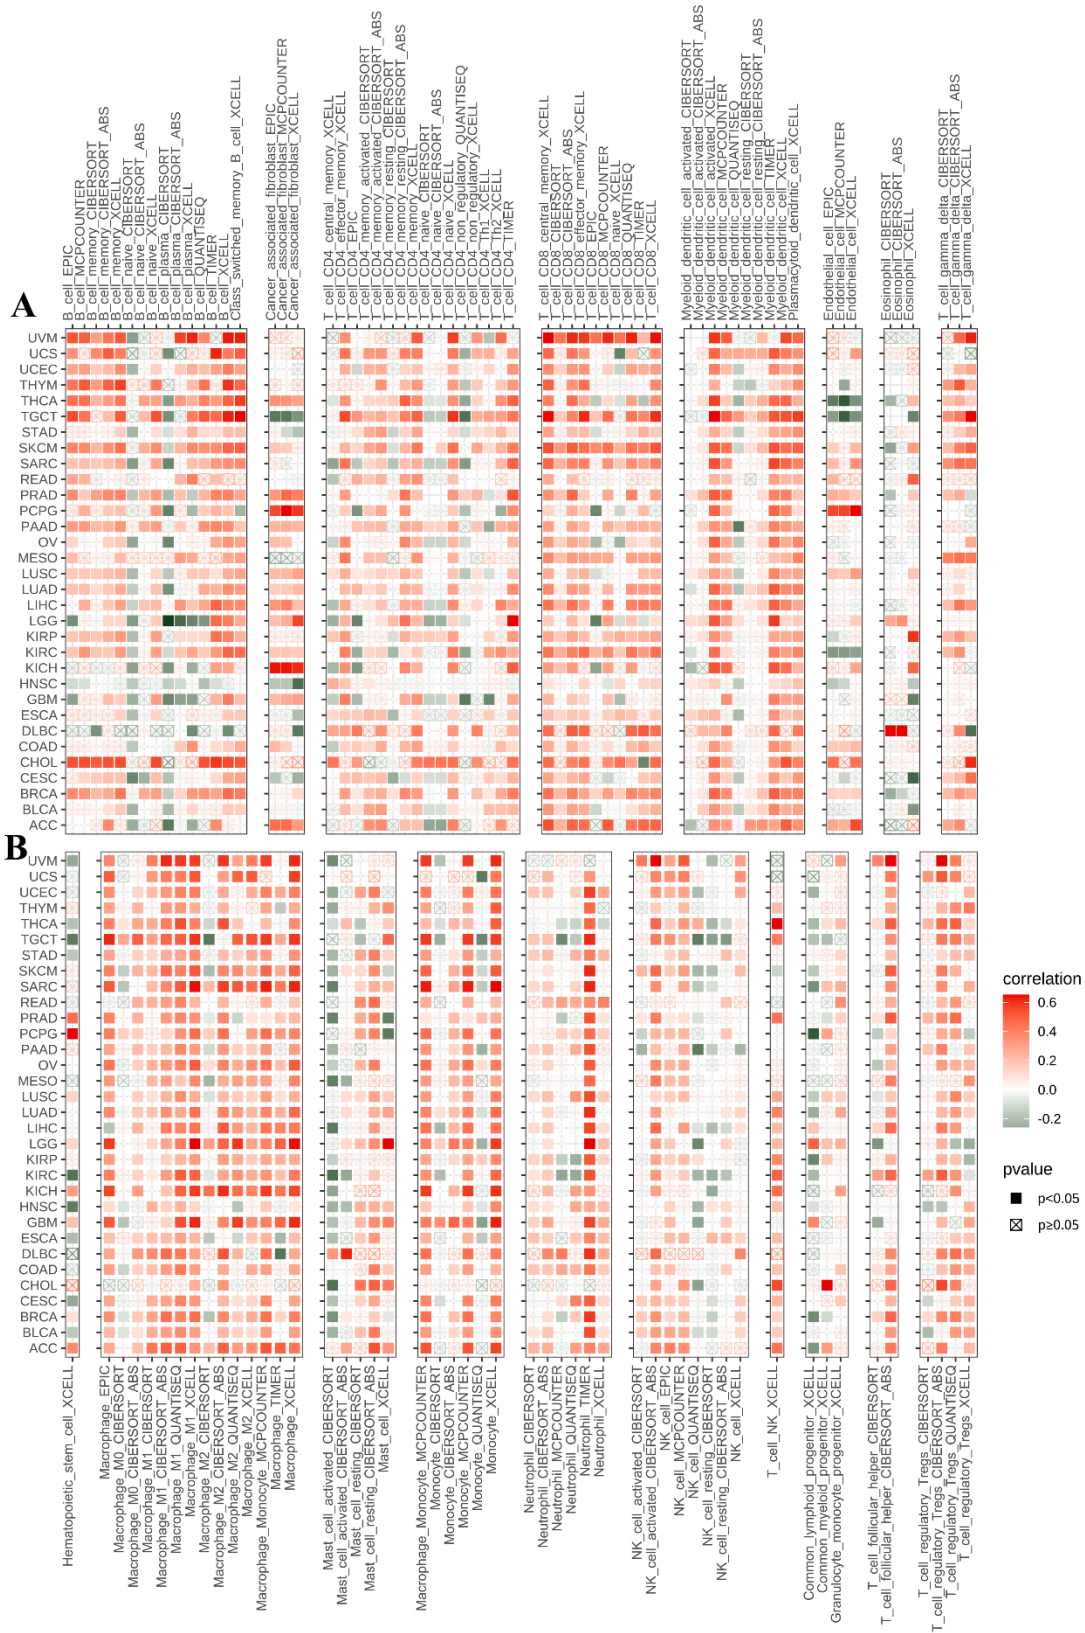

**Figure S8**

**A**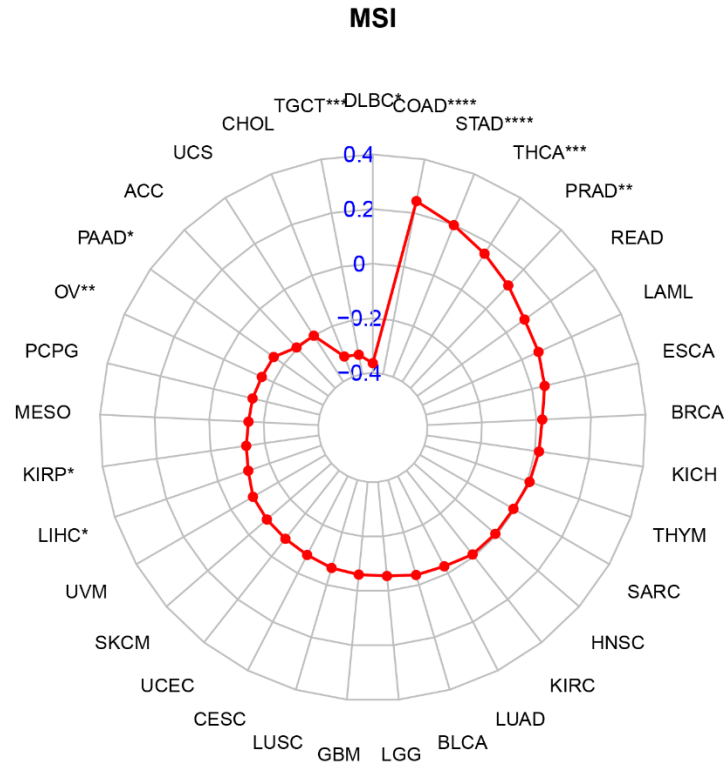**B**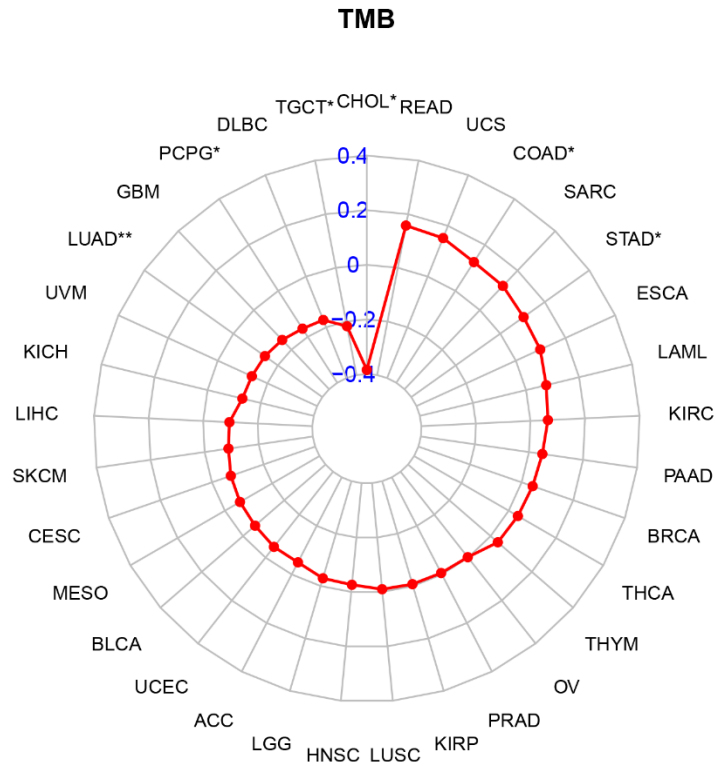**Figure S9**
