# Supplementary material for: Pan-cancer analyses of pyroptosis with functional implications for prognosis and immunotherapy in cancer
Source: J Transl Med. 2022 Mar 4;20:109. doi: 10.1186/s12967-022-03313-x (PMC8896277; doi:10.1186/s12967-022-03313-x)
Supplement: Supplementary file 1 — Additional file 1: Table S1. Lists of cancer types. Table S2. The 33 pyroptosis-associated genes used for classification. Table S3. Association between pyroptosis genes mutation and prognosis among cancers. Table S4. Methylation differences for pyroptosis genes in cancers. Table S5. Correlation of DNA methylation with pyroptosis genes expression. Table S6. CTRP drug sensitivity for pyroptosis genes in cancers. Table S7. GDSC drug sensitivity for pyroptosis genes in cancers. [file 12967_2022_3313_MOESM1_ESM.xlsx]

## Sheet: Table S1
Table S1 Lists of cancer types
Abbreviation	Full name
ACC	Adrenocortical carcinoma
BLCA	Bladder Urothelial Carcinoma
BRCA	Breast invasive carcinoma
CESC	Cervical squamous cell carcinoma and endocervical adenocarcinoma
CHOL	Cholangiocarcinoma
COADREAD	Colon adenocarcinoma/Rectum adenocarcinoma Esophageal carcinoma
DLBC	Lymphoid Neoplasm Diffuse Large B-cell Lymphoma
ESCA	Esophageal carcinoma
GBM	Glioblastoma multiforme
HNSC	Head and Neck squamous cell carcinoma
KICH	Kidney Chromophobe
KIRC	Kidney renal clear cell carcinoma
KIRP	Kidney renal papillary cell carcinoma
LAML	Acute Myeloid Leukemia
LGG	Brain Lower Grade Glioma
LIHC	Liver hepatocellular carcinoma
LUAD	Lung adenocarcinoma
LUSC	Lung squamous cell carcinoma
MESO	Mesothelioma
OV	Ovarian serous cystadenocarcinoma
PAAD	Pancreatic adenocarcinoma
PCPG	Pheochromocytoma and Paraganglioma
PRAD	Prostate adenocarcinoma
READ	Rectum adenocarcinoma
SARC	Sarcoma
SKCM	Skin Cutaneous Melanoma
STAD	Stomach adenocarcinoma
STES	Stomach and Esophageal carcinoma
TGCT	Testicular Germ Cell Tumors
THCA	Thyroid carcinoma
THYM	Thymoma
UCEC	Uterine Corpus Endometrial Carcinoma
UCS	Uterine Carcinosarcoma
UVM	Uveal Melanoma

## Sheet: Table S2
TableS2 The 33 pyroptosis-associated genes used for comprehensive analysis
Gene Symbol	Entrez Gene ID	Description
AIM2	9447	Absent In Melanoma 2
CASP1	834	Caspase 1
CASP3	836	Caspase 3
CASP4	837	Caspase 4
CASP5	838	Caspase 5
CASP6	839	Caspase 6
CASP8	841	Caspase 8
CASP9	842	Caspase 9
ELANE	1991	Elastase, Neutrophil Expressed
GPX4	2879	Glutathione Peroxidase 4
GSDMA	284110	Gasdermin A
GSDMB	55876	Gasdermin B
GSDMC	56169	Gasdermin C
GSDMD	79792	Gasdermin D
GSDME	1687	Gasdermin E
IL18	3606	Interleukin 18
IL1B	3553	Interleukin 1B
IL6	3569	Interleukin 6
NLRC4	58484	Nucleotide-Binding Oligomerization Domain, Leucine Rich Repeat And CARD Domain Containing 4
NLRP1	22861	Nucleotide-Binding Oligomerization Domain, Leucine Rich Repeat And Pyrin Domain Containing 1
NLRP2	55655	Nucleotide-Binding Oligomerization Domain, Leucine Rich Repeat And Pyrin Domain Containing 2
NLRP3	114548	Nucleotide-Binding Oligomerization Domain, Leucine Rich Repeat And Pyrin Domain Containing 3
NLRP7	199713	Nucleotide-Binding Oligomerization Domain, Leucine Rich Repeat And Pyrin Domain Containing 7
NLRP6	171389	Nucleotide-Binding Oligomerization Domain, Leucine Rich Repeat And Pyrin Domain Containing 6
NOD1	10392	Nucleotide Binding Oligomerization Domain Containing 1
NOD2	64127	Nucleotide Binding Oligomerization Domain Containing 2
PLCG1	5335	Phospholipase C Gamma 1
PJVK	494513	Pejvakin
PRKACA	5566	Protein Kinase CAMP-Activated Catalytic Subunit Alpha
PYCARD	29108	PYD And CARD Domain Containing
SCAF11	9169	SR-Related CTD Associated Factor 11
TIRAP	114609	TIR Domain Containing Adaptor Protein
TNF	7124	Tumor Necrosis Factor

## Sheet: Table S3
Table S3 Association between pyroptosis genes mutation and prognosis among cancers
Cancertype	symbol	Sur_type	Log_rank_p	Cox_p	HR	Higher_risk_of_death	Mutant	WT	Entrez
ACC	PLCG1	PFS	4.36703e-10	8.03035e-06	20.3937	Mutant	3	89	5335
ACC	PLCG1	DSS	3.2344e-05	0.000562203	8.62855	Mutant	3	85	5335
ACC	PLCG1	OS	4.342e-05	0.000640853	8.31431	Mutant	3	89	5335
ACC	NLRP1	PFS	0.00495247	0.0107	4.87368	Mutant	3	89	22861
ACC	NLRP1	DSS	0.282446	0.294985	2.16285	Mutant	3	85	22861
ACC	NLRP1	OS	0.31062	0.321839	2.07004	Mutant	3	89	22861
BLCA	NLRP3	OS	0.00532239	0.0234199	0.102915	WT	13	396	114548
BLCA	NLRP3	DSS	0.008703	0.993063	3.75449e-08	WT	12	341	114548
BLCA	NLRP3	PFS	0.0158124	0.0221469	0.312459	WT	13	398	114548
BLCA	CASP1	PFS	0.0226799	0.0372155	0.227466	WT	11	400	834
BLCA	NOD1	OS	0.028966	0.990855	1.06923e-07	WT	6	403	10392
BLCA	CASP8	DSS	0.0323959	0.063223	0.154729	WT	12	341	841
BLCA	NOD2	PFS	0.0336749	0.0645291	0.156508	WT	7	404	64127
BLCA	CASP1	DSS	0.0436945	0.994578	3.89843e-08	WT	9	344	834
BLCA	NOD1	DSS	0.0605672	0.994939	3.92816e-08	WT	6	347	10392
BLCA	NLRP2	PFS	0.0814088	0.0938853	0.377504	WT	11	400	55655
BLCA	CASP8	PFS	0.0841499	0.0905791	0.496309	WT	15	396	841
BLCA	NOD2	OS	0.0915439	0.125588	0.214656	WT	7	402	64127
BLCA	CASP1	OS	0.0919339	0.110052	0.320629	WT	11	398	834
BLCA	NLRP1	DSS	0.0982893	0.993035	1.08434e-07	WT	6	347	22861
BLCA	CASP8	OS	0.10116	0.110707	0.446148	WT	15	394	841
BLCA	NOD1	PFS	0.106098	0.123977	0.334825	WT	6	405	10392
BLCA	GSDMA	PFS	0.123382	0.989882	3.00533e-07	WT	3	408	284110
BLCA	NLRP3	DFI	0.124198	0.997415	1.35204e-08	WT	8	154	114548
BLCA	GSDMD	DSS	0.13301	0.993709	1.06805e-07	WT	3	350	79792
BLCA	NLRC4	DSS	0.133987	0.993669	1.09126e-07	WT	8	345	58484
BLCA	NLRP1	OS	0.152469	0.183525	0.263455	WT	7	402	22861
BLCA	CASP1	DFI	0.159497	0.996286	3.74184e-08	WT	7	155	834
BLCA	AIM2	PFS	0.174536	0.185162	2.16633	Mutant	4	407	9447
BLCA	NOD2	DSS	0.182482	0.211394	0.284329	WT	7	346	64127
BLCA	NLRP2	DFI	0.187602	0.996508	3.77479e-08	WT	6	156	55655
BLCA	NLRP6	DSS	0.18799	0.198709	2.12521	Mutant	5	348	171389
BLCA	NOD2	DFI	0.193703	0.996608	3.61398e-08	WT	5	157	64127
BLCA	GSDMD	OS	0.207836	0.23484	0.303186	WT	4	405	79792
BLCA	NLRC4	OS	0.208504	0.235746	0.304478	WT	9	400	58484
BLCA	GSDMA	OS	0.208653	0.991734	3.01314e-07	WT	3	406	284110
BLCA	IL1B	OS	0.217736	0.232277	2.34259	Mutant	3	406	3553
BLCA	NLRP2	OS	0.225453	0.234603	0.500355	WT	11	398	55655
BLCA	NLRP2	DSS	0.236788	0.249888	0.440085	WT	10	343	55655
BLCA	CASP4	DSS	0.25994	0.995217	1.1036e-07	WT	3	350	837
BLCA	GSDMA	DSS	0.272725	0.992793	3.00895e-07	WT	3	350	284110
BLCA	IL6	PFS	0.276004	0.287329	0.469209	WT	5	406	3569
BLCA	PLCG1	PFS	0.284706	0.288258	0.644365	WT	13	398	5335
BLCA	NLRC4	PFS	0.285973	0.296872	0.476592	WT	9	402	58484
BLCA	AIM2	DSS	0.300371	0.311234	2.06302	Mutant	4	349	9447
BLCA	CASP8	DFI	0.302756	0.322922	0.365746	WT	8	154	841
BLCA	NLRP1	DFI	0.311053	0.99727	3.92308e-08	WT	4	158	22861
BLCA	CASP5	DSS	0.331948	0.336399	1.63093	Mutant	8	345	838
BLCA	PLCG1	OS	0.334555	0.339337	0.61671	WT	13	396	5335
BLCA	CASP5	DFI	0.362149	0.997537	3.94667e-08	WT	4	158	838
BLCA	GSDME	DFI	0.371879	0.997602	3.8832e-08	WT	3	159	1687
BLCA	SCAF11	DSS	0.37822	0.381958	0.640766	WT	14	339	9169
BLCA	NLRC4	DFI	0.391759	0.996399	1.0787e-07	WT	4	158	58484
BLCA	IL6	DFI	0.401187	0.996501	1.05503e-07	WT	3	159	3569
BLCA	SCAF11	OS	0.403594	0.405996	0.707778	WT	16	393	9169
BLCA	SCAF11	PFS	0.418945	0.421018	0.748457	WT	16	395	9169
BLCA	NLRP1	PFS	0.446595	0.450695	0.645035	WT	7	404	22861
BLCA	ELANE	DSS	0.446893	0.452699	1.70939	Mutant	4	349	1991
BLCA	NLRP6	OS	0.45017	0.454308	1.54831	Mutant	5	404	171389
BLCA	PLCG1	DSS	0.451761	0.45571	0.646469	WT	12	341	5335
BLCA	GSDMD	PFS	0.454627	0.459605	0.591309	WT	4	407	79792
BLCA	PLCG1	DFI	0.472785	0.477733	1.68089	Mutant	7	155	5335
BLCA	AIM2	OS	0.491435	0.496356	1.62386	Mutant	4	405	9447
BLCA	GSDMC	PFS	0.49619	0.49962	1.48171	Mutant	4	407	56169
BLCA	CASP9	PFS	0.504513	0.508196	0.624977	WT	5	406	842
BLCA	TNF	OS	0.50997	0.51724	0.522253	WT	3	406	7124
BLCA	IL6	OS	0.535427	0.538462	0.645206	WT	5	404	3569
BLCA	IL1B	PFS	0.535571	0.539401	1.54726	Mutant	3	408	3553
BLCA	CASP4	OS	0.549591	0.555834	0.553791	WT	4	405	837
BLCA	NLRP7	DFI	0.581219	0.586036	1.74212	Mutant	5	157	199713
BLCA	NLRP6	PFS	0.591623	0.592911	1.36581	Mutant	5	406	171389
BLCA	IL6	DSS	0.626185	0.629445	0.615349	WT	4	349	3569
BLCA	ELANE	OS	0.647034	0.649119	1.38256	Mutant	4	405	1991
BLCA	CASP5	OS	0.665935	0.666605	1.24362	Mutant	8	401	838
BLCA	TNF	DSS	0.710857	0.712293	0.690452	WT	3	350	7124
BLCA	TNF	PFS	0.717461	0.717853	0.773573	WT	3	408	7124
BLCA	GSDMC	OS	0.735298	0.736663	1.27045	Mutant	4	405	56169
BLCA	CASP4	PFS	0.7739	0.774605	0.815828	WT	4	407	837
BLCA	GSDMD	DFI	0.774379	0.775149	1.33712	Mutant	3	159	79792
BLCA	CASP9	DSS	0.788794	0.788304	1.2111	Mutant	5	348	842
BLCA	GSDME	PFS	0.810997	0.811381	0.870237	WT	6	405	1687
BLCA	NLRP7	DSS	0.896187	0.89682	1.06106	Mutant	13	340	199713
BLCA	SCAF11	DFI	0.901547	0.901611	1.13413	Mutant	4	158	9169
BLCA	NOD1	DFI	0.903356	0.903417	1.13217	Mutant	3	159	10392
BLCA	CASP9	OS	0.913891	0.914277	0.926284	WT	5	404	842
BLCA	GSDME	OS	0.923078	0.923762	1.05747	Mutant	6	403	1687
BLCA	GSDMC	DSS	0.932413	0.932731	1.0885	Mutant	3	350	56169
BLCA	ELANE	PFS	0.940088	0.939789	1.05517	Mutant	4	407	1991
BLCA	NLRP7	OS	0.942163	0.941219	0.96982	WT	14	395	199713
BLCA	CASP5	PFS	0.98066	0.979887	0.987356	WT	8	403	838
BLCA	GSDME	DSS	0.984547	0.984895	1.01363	Mutant	5	348	1687
BLCA	NLRP7	PFS	0.993734	0.993698	0.99716	WT	14	397	199713
BRCA	NOD2	PFS	0.000233591	0.00661186	16.1321	Mutant	3	1022	64127
BRCA	NLRP7	OS	0.0180621	0.0273078	3.64141	Mutant	12	1013	199713
BRCA	PJVK	DFI	0.0182293	0.0456523	7.63683	Mutant	5	845	494513
BRCA	GSDMC	PFS	0.0237967	0.0384322	4.39341	Mutant	10	1015	56169
BRCA	AIM2	DFI	0.0238934	0.053311	7.13972	Mutant	5	845	9447
BRCA	SCAF11	PFS	0.0421324	0.0593935	3.8651	Mutant	10	1015	9169
BRCA	AIM2	DSS	0.0500612	0.0835954	5.74746	Mutant	5	954	9447
BRCA	PJVK	DSS	0.0500612	0.0835954	5.74746	Mutant	5	954	494513
BRCA	GSDMB	PFS	0.0756337	0.0880854	2.7028	Mutant	8	1017	55876
BRCA	GSDMC	DSS	0.07903	0.113816	4.96941	Mutant	10	949	56169
BRCA	PJVK	PFS	0.0936252	0.127934	4.64819	Mutant	5	1020	494513
BRCA	AIM2	PFS	0.102487	0.136547	4.49389	Mutant	5	1020	9447
BRCA	CASP6	DSS	0.104593	0.138704	4.45547	Mutant	3	956	839
BRCA	SCAF11	DSS	0.117251	0.151149	4.30394	Mutant	10	949	9169
BRCA	SCAF11	DFI	0.137678	0.170352	4.02378	Mutant	9	841	9169
BRCA	GSDMC	DFI	0.143061	0.175186	3.94109	Mutant	9	841	56169
BRCA	NLRP7	PFS	0.145863	0.157254	2.28044	Mutant	12	1013	199713
BRCA	GSDMC	OS	0.16304	0.193748	3.71394	Mutant	10	1015	56169
BRCA	PJVK	OS	0.164417	0.194872	3.6853	Mutant	5	1020	494513
BRCA	CASP6	DFI	0.164671	0.195143	3.69065	Mutant	3	847	839
BRCA	AIM2	OS	0.166121	0.196455	3.66833	Mutant	5	1020	9447
BRCA	SCAF11	OS	0.203258	0.23108	3.36098	Mutant	10	1015	9169
BRCA	NLRC4	DSS	0.221775	0.235907	2.34442	Mutant	11	948	58484
BRCA	GSDMB	DSS	0.23449	0.248055	2.32622	Mutant	8	951	55876
BRCA	PLCG1	OS	0.237156	0.25043	2.27185	Mutant	10	1015	5335
BRCA	CASP8	PFS	0.240201	0.264676	0.32671	WT	19	1006	841
BRCA	CASP6	OS	0.261014	0.284111	2.93531	Mutant	3	1022	839
BRCA	NOD1	OS	0.286121	0.992997	3.00277e-07	WT	7	1018	10392
BRCA	NLRP1	PFS	0.327217	0.345131	0.38791	WT	13	1012	22861
BRCA	CASP5	OS	0.351332	0.993863	3.02329e-07	WT	6	1019	838
BRCA	NLRP3	DSS	0.370528	0.385724	2.39961	Mutant	13	946	114548
BRCA	NLRC4	OS	0.381263	0.386557	1.65906	Mutant	12	1013	58484
BRCA	NLRP1	DFI	0.384139	0.994285	3.00311e-07	WT	10	840	22861
BRCA	NLRC4	DFI	0.385517	0.994305	2.99846e-07	WT	9	841	58484
BRCA	PRKACA	PFS	0.393655	0.991342	8.24754e-07	WT	6	1019	5566
BRCA	NOD1	DSS	0.416564	0.994672	2.99459e-07	WT	7	952	10392
BRCA	PLCG1	DSS	0.42409	0.436064	2.19377	Mutant	9	950	5335
BRCA	NLRP7	DFI	0.431837	0.994829	3.01551e-07	WT	8	842	199713
BRCA	PLCG1	DFI	0.453798	0.995071	3.01767e-07	WT	8	842	5335
BRCA	NLRP2	OS	0.460325	0.465267	0.593701	WT	14	1011	55655
BRCA	NLRP3	DFI	0.463768	0.995178	3.01895e-07	WT	9	841	114548
BRCA	CASP5	DSS	0.46411	0.995182	3.01824e-07	WT	6	953	838
BRCA	NLRP7	DSS	0.466446	0.476109	2.05133	Mutant	10	949	199713
BRCA	CASP1	PFS	0.46762	0.992622	8.26278e-07	WT	4	1021	834
BRCA	CASP8	OS	0.469539	0.478773	0.491015	WT	19	1006	841
BRCA	PRKACA	OS	0.491586	0.993018	8.25098e-07	WT	6	1019	5566
BRCA	GSDMA	PFS	0.497852	0.993112	8.26948e-07	WT	4	1021	284110
BRCA	NLRP1	OS	0.501294	0.50903	0.51529	WT	13	1012	22861
BRCA	CASP6	PFS	0.516299	0.523551	1.89668	Mutant	3	1022	839
BRCA	GSDMB	DFI	0.540521	0.546697	1.83578	Mutant	6	844	55876
BRCA	CASP1	OS	0.545021	0.993852	8.26286e-07	WT	4	1021	834
BRCA	PRKACA	DFI	0.545354	0.996013	3.03001e-07	WT	6	844	5566
BRCA	NLRP2	PFS	0.545885	0.547747	0.703833	WT	14	1011	55655
BRCA	GSDME	PFS	0.556982	0.994032	8.27027e-07	WT	5	1020	1687
BRCA	PRKACA	DSS	0.59244	0.994568	8.24548e-07	WT	6	953	5566
BRCA	PLCG1	PFS	0.593371	0.595316	1.4594	Mutant	10	1015	5335
BRCA	GSDMA	OS	0.600692	0.994681	8.27211e-07	WT	4	1021	284110
BRCA	CASP1	DFI	0.61767	0.99493	8.25985e-07	WT	4	846	834
BRCA	GSDMA	DFI	0.619272	0.994953	8.25957e-07	WT	4	846	284110
BRCA	CASP5	DFI	0.635016	0.638163	1.60611	Mutant	6	844	838
BRCA	NLRP2	DSS	0.635415	0.6385	0.622057	WT	13	946	55655
BRCA	CASP1	DSS	0.648417	0.995369	8.26159e-07	WT	4	955	834
BRCA	NLRP3	OS	0.658537	0.661188	1.5537	Mutant	13	1012	114548
BRCA	GSDME	OS	0.659201	0.993138	2.24892e-06	WT	5	1020	1687
BRCA	NLRC4	PFS	0.662759	0.663556	1.28867	Mutant	12	1013	58484
BRCA	GSDME	DFI	0.662762	0.99557	8.26038e-07	WT	4	846	1687
BRCA	NOD1	PFS	0.672693	0.674823	0.656263	WT	7	1018	10392
BRCA	GSDMA	DSS	0.675165	0.995742	8.26764e-07	WT	4	955	284110
BRCA	NLRP2	DFI	0.691735	0.693647	0.672165	WT	12	838	55655
BRCA	GSDME	DSS	0.70387	0.996138	8.26929e-07	WT	5	954	1687
BRCA	NOD1	DFI	0.727066	0.728402	1.42014	Mutant	7	843	10392
BRCA	NOD2	OS	0.731164	0.99465	2.2527e-06	WT	3	1022	64127
BRCA	NOD2	DSS	0.766647	0.99538	2.25208e-06	WT	3	956	64127
BRCA	GSDMB	OS	0.778627	0.779247	1.22328	Mutant	8	1017	55876
BRCA	CASP5	PFS	0.81269	0.812991	0.788761	WT	6	1019	838
BRCA	CASP8	DSS	0.831246	0.831458	0.806953	WT	19	940	841
BRCA	CASP8	DFI	0.856605	0.8568	0.83381	WT	17	833	841
BRCA	CASP3	PFS	0.867365	0.994014	1.6673e-05	WT	3	1022	836
BRCA	NLRP1	DSS	0.906427	0.906382	0.888254	WT	13	946	22861
BRCA	CASP3	OS	0.917681	0.996295	1.6674e-05	WT	3	1022	836
BRCA	CASP3	DSS	0.928385	0.996779	1.6671e-05	WT	3	956	836
BRCA	NLRP3	PFS	0.937119	0.93748	0.924307	WT	13	1012	114548
CESC	NLRP6	DSS	0.0191088	0.033624	4.68708	Mutant	4	270	171389
CESC	NLRP6	OS	0.0252528	0.035896	3.47037	Mutant	5	286	171389
CESC	NLRP6	DFI	0.0840456	0.119992	4.962	Mutant	3	157	171389
CESC	NLRP7	DSS	0.0883087	0.0999755	2.66827	Mutant	7	267	199713
CESC	NLRP6	PFS	0.0910282	0.103929	2.60907	Mutant	5	286	171389
CESC	CASP5	PFS	0.128645	0.995935	3.85123e-08	WT	5	286	838
CESC	CASP5	OS	0.155729	0.996212	3.82688e-08	WT	5	286	838
CESC	NOD2	DSS	0.156929	0.996201	3.88617e-08	WT	7	267	64127
CESC	NLRP7	OS	0.165768	0.173266	2.01863	Mutant	8	283	199713
CESC	NLRP3	PFS	0.172256	0.182593	2.20151	Mutant	3	288	114548
CESC	NLRP2	PFS	0.186583	0.994445	1.08001e-07	WT	4	287	55655
CESC	NLRP3	OS	0.199827	0.210404	2.10252	Mutant	3	288	114548
CESC	NLRP2	OS	0.21153	0.99476	1.07295e-07	WT	4	287	55655
CESC	GSDMA	PFS	0.242284	0.99507	1.0857e-07	WT	3	288	284110
CESC	CASP5	DSS	0.260736	0.99528	1.07423e-07	WT	5	269	838
CESC	PLCG1	PFS	0.263794	0.995273	1.09453e-07	WT	5	286	5335
CESC	NOD2	DFI	0.282519	0.997129	3.84732e-08	WT	6	154	64127
CESC	NLRP2	DSS	0.28922	0.995549	1.07586e-07	WT	4	270	55655
CESC	GSDMA	OS	0.290935	0.995551	1.08338e-07	WT	3	288	284110
CESC	CASP8	PFS	0.294754	0.305478	0.480161	WT	13	278	841
CESC	SCAF11	DSS	0.325133	0.99585	1.08706e-07	WT	5	269	9169
CESC	NOD1	PFS	0.345335	0.995999	1.09997e-07	WT	4	287	10392
CESC	NOD2	OS	0.355682	0.371746	0.406383	WT	8	283	64127
CESC	CASP8	DSS	0.358595	0.375074	0.408213	WT	12	262	841
CESC	SCAF11	DFI	0.37618	0.997613	3.93222e-08	WT	5	155	9169
CESC	NLRP7	PFS	0.381423	0.383639	1.56347	Mutant	8	283	199713
CESC	PLCG1	OS	0.383048	0.996305	1.09806e-07	WT	5	286	5335
CESC	GSDMA	DSS	0.387366	0.99634	1.09693e-07	WT	3	271	284110
CESC	SCAF11	PFS	0.390499	0.404246	0.431929	WT	6	285	9169
CESC	PLCG1	DSS	0.40665	0.996488	1.09566e-07	WT	5	269	5335
CESC	NLRC4	PFS	0.41362	0.994625	3.01289e-07	WT	3	288	58484
CESC	NLRP2	DFI	0.416444	0.997803	3.95383e-08	WT	4	156	55655
CESC	NLRP1	DFI	0.431559	0.996692	1.07998e-07	WT	4	156	22861
CESC	CASP5	DFI	0.464742	0.996916	1.08734e-07	WT	3	157	838
CESC	NLRP7	DFI	0.464742	0.996916	1.08734e-07	WT	3	157	199713
CESC	NOD1	OS	0.471938	0.995283	2.99448e-07	WT	4	287	10392
CESC	GSDMA	DFI	0.475269	0.996987	1.08887e-07	WT	3	157	284110
CESC	NOD1	DSS	0.490673	0.995483	2.98955e-07	WT	4	270	10392
CESC	NLRP1	PFS	0.504778	0.512367	0.517076	WT	7	284	22861
CESC	PJVK	PFS	0.506277	0.995629	3.01466e-07	WT	3	288	494513
CESC	NLRC4	OS	0.515044	0.995718	3.01656e-07	WT	3	288	58484
CESC	NOD1	DFI	0.520443	0.997286	1.08992e-07	WT	3	157	10392
CESC	PLCG1	DFI	0.531628	0.997354	1.09465e-07	WT	3	157	5335
CESC	NLRC4	DSS	0.533715	0.995908	3.01272e-07	WT	3	271	58484
CESC	NOD2	PFS	0.544181	0.547138	0.649608	WT	8	283	64127
CESC	AIM2	DFI	0.562055	0.567826	1.79294	Mutant	3	157	9447
CESC	CASP8	DFI	0.574237	0.579225	0.567769	WT	11	149	841
CESC	SCAF11	OS	0.586712	0.591171	0.581912	WT	6	285	9169
CESC	PJVK	OS	0.620393	0.996741	3.01719e-07	WT	3	288	494513
CESC	PJVK	DSS	0.633678	0.996866	3.01432e-07	WT	3	271	494513
CESC	CASP8	OS	0.711185	0.712211	0.804205	WT	13	278	841
CESC	AIM2	PFS	0.76172	0.762468	0.737568	WT	3	288	9447
CESC	NLRP1	OS	0.812835	0.813085	0.787761	WT	7	284	22861
CESC	NLRP1	DSS	0.906316	0.906194	0.887676	WT	7	267	22861
CESC	AIM2	DSS	0.926282	0.926443	1.09786	Mutant	3	271	9447
CESC	AIM2	OS	0.930888	0.930682	0.915963	WT	3	288	9447
COAD	NOD1	OS	0.00284633	0.00457654	3.0803	Mutant	11	393	10392
COAD	NOD1	DSS	0.00452592	0.00987035	4.68832	Mutant	7	361	10392
COAD	CASP8	OS	0.0100533	0.0133584	2.66702	Mutant	17	387	841
COAD	NOD1	PFS	0.0130627	0.016497	2.54079	Mutant	11	393	10392
COAD	CASP8	DSS	0.0183561	0.0243375	2.88875	Mutant	15	353	841
COAD	NLRC4	DSS	0.0482059	0.0577086	2.69692	Mutant	12	356	58484
COAD	GSDMD	PFS	0.0825136	0.0898704	2.16748	Mutant	6	398	79792
COAD	NLRC4	OS	0.0843441	0.0909278	2.04494	Mutant	14	390	58484
COAD	IL6	PFS	0.112407	0.99331	1.08546e-07	WT	5	399	3569
COAD	AIM2	PFS	0.112558	0.145933	0.231981	WT	7	397	9447
COAD	CASP8	PFS	0.118091	0.123388	1.7551	Mutant	17	387	841
COAD	ELANE	OS	0.138546	0.99378	1.07616e-07	WT	7	397	1991
COAD	NLRP1	PFS	0.170403	0.176813	0.568507	WT	23	381	22861
COAD	IL6	OS	0.19379	0.994529	1.08263e-07	WT	5	399	3569
COAD	ELANE	DSS	0.232855	0.99499	1.07665e-07	WT	7	361	1991
COAD	PLCG1	OS	0.238269	0.251373	0.440051	WT	14	390	5335
COAD	NLRP7	PFS	0.263468	0.267392	0.667174	WT	31	373	199713
COAD	GSDMC	OS	0.269503	0.276911	1.89569	Mutant	9	395	56169
COAD	GPX4	PFS	0.273846	0.992811	3.00853e-07	WT	3	401	2879
COAD	AIM2	OS	0.277091	0.298832	0.351258	WT	7	397	9447
COAD	PJVK	DSS	0.281045	0.303545	2.8307	Mutant	3	365	494513
COAD	NLRP2	DFI	0.286824	0.997171	3.79668e-08	WT	9	149	55655
COAD	GSDME	PFS	0.295527	0.301501	1.69001	Mutant	8	396	1687
COAD	NOD1	DFI	0.298197	0.319443	2.78937	Mutant	3	155	10392
COAD	GSDMD	DSS	0.312809	0.323646	2.03736	Mutant	5	363	79792
COAD	IL6	DSS	0.316715	0.995781	1.08486e-07	WT	5	363	3569
COAD	NLRP6	DSS	0.326168	0.995851	1.0926e-07	WT	7	361	171389
COAD	NLRP1	DFI	0.326386	0.344843	0.378016	WT	12	146	22861
COAD	IL18	PFS	0.339026	0.357628	0.396794	WT	4	400	3606
COAD	CASP1	DSS	0.343714	0.35764	2.53841	Mutant	5	363	834
COAD	NLRC4	PFS	0.346283	0.35022	1.47821	Mutant	14	390	58484
COAD	PLCG1	DSS	0.346892	0.363565	0.399666	WT	13	355	5335
COAD	GSDMC	DFI	0.347149	0.997481	3.87225e-08	WT	6	152	56169
COAD	NLRP3	PFS	0.367027	0.370318	0.66461	WT	22	382	114548
COAD	SCAF11	OS	0.372052	0.375641	0.664705	WT	25	379	9169
COAD	AIM2	DFI	0.374779	0.997628	3.84798e-08	WT	4	154	9447
COAD	NOD2	DFI	0.386257	0.394549	1.88331	Mutant	7	151	64127
COAD	GSDMC	DSS	0.386363	0.392598	1.85229	Mutant	8	360	56169
COAD	IL18	DSS	0.387934	0.996352	1.09143e-07	WT	3	365	3606
COAD	PLCG1	PFS	0.39503	0.398175	0.651152	WT	14	390	5335
COAD	PLCG1	DFI	0.422825	0.997838	3.93254e-08	WT	5	153	5335
COAD	NLRP7	OS	0.424971	0.429101	0.715264	WT	31	373	199713
COAD	CASP5	DFI	0.428389	0.997864	3.93127e-08	WT	4	154	838
COAD	NLRP2	DSS	0.431794	0.437471	0.571733	WT	22	346	55655
COAD	CASP5	DSS	0.432352	0.439329	1.74649	Mutant	11	357	838
COAD	ELANE	DFI	0.432865	0.997883	3.93524e-08	WT	4	154	1991
COAD	GPX4	OS	0.434892	0.994865	3.01489e-07	WT	3	401	2879
COAD	PJVK	OS	0.437541	0.449191	2.14425	Mutant	3	401	494513
COAD	GSDMA	PFS	0.456795	0.462023	0.591637	WT	6	398	284110
COAD	GSDMD	OS	0.469965	0.47368	1.52525	Mutant	6	398	79792
COAD	CASP9	DSS	0.47616	0.995322	3.00485e-07	WT	4	364	842
COAD	CASP5	OS	0.477464	0.481265	1.51307	Mutant	12	392	838
COAD	NLRP6	OS	0.48871	0.497002	0.504995	WT	8	396	171389
COAD	CASP1	OS	0.490673	0.495957	1.98762	Mutant	5	399	834
COAD	NLRP7	DFI	0.491951	0.50036	0.500852	WT	14	144	199713
COAD	GPX4	DSS	0.493625	0.995501	3.01101e-07	WT	3	365	2879
COAD	GSDME	DFI	0.495689	0.997138	1.07705e-07	WT	3	155	1687
COAD	IL6	DFI	0.495763	0.997135	1.08003e-07	WT	3	155	3569
COAD	CASP4	PFS	0.502731	0.511344	0.517142	WT	6	398	837
COAD	ELANE	PFS	0.504552	0.508627	0.624297	WT	7	397	1991
COAD	NLRP6	DFI	0.507912	0.997215	1.08095e-07	WT	5	153	171389
COAD	GSDMB	DSS	0.512248	0.995691	3.0147e-07	WT	3	365	55876
COAD	SCAF11	PFS	0.516134	0.517449	0.799523	WT	25	379	9169
COAD	GSDMB	PFS	0.536961	0.543036	0.542661	WT	4	400	55876
COAD	GPX4	DFI	0.546011	0.997452	1.08845e-07	WT	3	155	2879
COAD	SCAF11	DSS	0.546453	0.549046	0.700368	WT	23	345	9169
COAD	IL1B	OS	0.573839	0.578704	0.571441	WT	5	399	3553
COAD	NLRC4	DFI	0.582933	0.588184	1.74687	Mutant	6	152	58484
COAD	AIM2	DSS	0.599009	0.603013	0.590958	WT	7	361	9447
COAD	CASP4	DFI	0.631642	0.997973	1.09364e-07	WT	3	155	837
COAD	GSDMA	DSS	0.63423	0.636507	1.40674	Mutant	6	362	284110
COAD	IL18	OS	0.645965	0.648742	0.632059	WT	4	400	3606
COAD	CASP1	DFI	0.671795	0.997224	2.98947e-07	WT	3	155	834
COAD	NOD2	DSS	0.680713	0.681272	0.743855	WT	17	351	64127
COAD	NLRP2	OS	0.686229	0.686149	0.83035	WT	25	379	55655
COAD	NOD2	OS	0.687944	0.688191	0.78991	WT	18	386	64127
COAD	CASP9	PFS	0.717638	0.718729	0.696382	WT	5	399	842
COAD	NOD2	PFS	0.724546	0.725817	1.14583	Mutant	18	386	64127
COAD	GSDMB	OS	0.753144	0.754007	0.729271	WT	4	400	55876
COAD	TIRAP	OS	0.761601	0.762378	0.737406	WT	3	401	114609
COAD	IL1B	DFI	0.762251	0.763321	1.36852	Mutant	3	155	3553
COAD	NLRP1	OS	0.790913	0.791596	0.894024	WT	23	381	22861
COAD	CASP9	OS	0.795348	0.795701	0.770656	WT	5	399	842
COAD	GSDME	DSS	0.811923	0.811989	0.786563	WT	7	361	1687
COAD	GSDMA	OS	0.816147	0.816131	0.846539	WT	6	398	284110
COAD	CASP4	DSS	0.82063	0.818631	1.26072	Mutant	6	362	837
COAD	IL1B	PFS	0.824867	0.824478	0.853354	WT	5	399	3553
COAD	NLRP6	PFS	0.830852	0.830323	0.858267	WT	8	396	171389
COAD	NLRP3	DFI	0.832586	0.83317	1.17012	Mutant	14	144	114548
COAD	NLRP3	OS	0.832589	0.834226	0.89842	WT	22	382	114548
COAD	NLRP2	PFS	0.833554	0.835671	0.927239	WT	25	379	55655
COAD	CASP8	DFI	0.853586	0.85411	1.20771	Mutant	7	151	841
COAD	CASP5	PFS	0.861218	0.860332	0.902333	WT	12	392	838
COAD	SCAF11	DFI	0.871625	0.871417	0.88616	WT	13	145	9169
COAD	GSDME	OS	0.872371	0.872942	1.12124	Mutant	8	396	1687
COAD	NLRP3	DSS	0.876973	0.874921	1.09822	Mutant	21	347	114548
COAD	CASP1	PFS	0.885513	0.883433	1.15882	Mutant	5	399	834
COAD	CASP4	OS	0.888642	0.890492	0.870584	WT	6	398	837
COAD	PJVK	PFS	0.899757	0.900427	1.13392	Mutant	3	401	494513
COAD	NLRP1	DSS	0.902153	0.901388	1.06662	Mutant	21	347	22861
COAD	GSDMC	PFS	0.920081	0.919785	1.06058	Mutant	9	395	56169
COAD	IL1B	DSS	0.957857	0.957455	0.947388	WT	5	363	3553
COAD	NLRP7	DSS	0.976207	0.972231	1.0165	Mutant	30	338	199713
COAD	TIRAP	PFS	0.98851	0.987807	0.989148	WT	3	401	114609
ESCA	PJVK	OS	0.000342139	0.00323762	9.10352	Mutant	3	182	494513
ESCA	PLCG1	OS	0.00251592	0.00567047	4.31444	Mutant	6	179	5335
ESCA	PJVK	PFS	0.00535685	0.0147385	6.01387	Mutant	3	182	494513
ESCA	PLCG1	PFS	0.00578188	0.00946748	3.34528	Mutant	6	179	5335
ESCA	PLCG1	DSS	0.0530542	0.072157	3.77705	Mutant	4	155	5335
ESCA	NOD2	OS	0.0749802	0.0880279	2.74903	Mutant	4	181	64127
ESCA	NOD2	PFS	0.134817	0.144621	2.1082	Mutant	4	181	64127
ESCA	CASP8	DFI	0.171907	0.189393	2.68015	Mutant	3	70	841
ESCA	NLRC4	DSS	0.277936	0.289983	2.15839	Mutant	4	155	58484
ESCA	CASP8	OS	0.326726	0.995861	1.0889e-07	WT	3	182	841
ESCA	NLRP1	PFS	0.407656	0.994555	3.01502e-07	WT	3	182	22861
ESCA	NLRP3	PFS	0.414163	0.421744	1.77827	Mutant	3	182	114548
ESCA	CASP8	DSS	0.414605	0.996563	1.08444e-07	WT	3	156	841
ESCA	NLRP2	PFS	0.420186	0.432027	0.453927	WT	3	182	55655
ESCA	NLRC4	PFS	0.43438	0.439703	1.57552	Mutant	4	181	58484
ESCA	GSDMC	DSS	0.459894	0.469694	0.479558	WT	4	155	56169
ESCA	NLRC4	OS	0.53885	0.542582	1.55025	Mutant	4	181	58484
ESCA	NLRP1	OS	0.577144	0.99633	3.02114e-07	WT	3	182	22861
ESCA	NLRP3	OS	0.643308	0.646705	1.58927	Mutant	3	182	114548
ESCA	CASP8	PFS	0.643997	0.643823	1.39285	Mutant	3	182	841
ESCA	NLRP1	DSS	0.646801	0.996985	3.01739e-07	WT	3	156	22861
ESCA	GSDMC	OS	0.679296	0.680233	0.74308	WT	5	180	56169
ESCA	NLRP2	OS	0.854212	0.85418	0.830836	WT	3	182	55655
ESCA	GSDMC	PFS	0.869614	0.870617	1.08676	Mutant	5	180	56169
ESCA	NLRP2	DSS	0.890604	0.890843	1.14913	Mutant	3	156	55655
GBM	SCAF11	PFS	0.0646097	0.082572	0.291791	WT	5	395	9169
GBM	NLRP1	PFS	0.0818038	0.0909443	0.424323	WT	6	394	22861
GBM	SCAF11	OS	0.123047	0.155841	0.241249	WT	5	392	9169
GBM	SCAF11	DSS	0.138098	0.170074	0.252832	WT	5	353	9169
GBM	GSDMB	OS	0.152234	0.158755	0.527884	WT	5	392	55876
GBM	GSDMB	PFS	0.173355	0.180312	0.542061	WT	5	395	55876
GBM	CASP1	PFS	0.299169	0.305919	0.552117	WT	5	395	834
GBM	NOD2	DSS	0.3179	0.32535	2.01572	Mutant	3	355	64127
GBM	NLRP7	PFS	0.344047	0.345663	0.726876	WT	10	390	199713
GBM	NLRP1	OS	0.360662	0.363369	0.630586	WT	6	391	22861
GBM	NOD2	OS	0.403646	0.408216	1.80155	Mutant	3	394	64127
GBM	NOD1	PFS	0.421366	0.424481	0.697523	WT	7	393	10392
GBM	TIRAP	OS	0.48624	0.494416	0.504201	WT	3	394	114609
GBM	NOD1	OS	0.494579	0.500913	0.738005	WT	7	390	10392
GBM	GSDMB	DSS	0.506265	0.507541	0.715726	WT	4	354	55876
GBM	PLCG1	PFS	0.523493	0.523852	0.76878	WT	6	394	5335
GBM	TIRAP	DSS	0.526594	0.532911	0.535197	WT	3	355	114609
GBM	NLRP2	PFS	0.531403	0.531985	0.77292	WT	9	391	55655
GBM	PRKACA	PFS	0.534728	0.533099	1.36885	Mutant	5	395	5566
GBM	NOD1	DSS	0.548525	0.555259	0.765936	WT	7	351	10392
GBM	NLRP3	DSS	0.592552	0.594292	1.22677	Mutant	9	349	114548
GBM	NLRP2	DSS	0.595207	0.598413	1.24346	Mutant	9	349	55655
GBM	NLRP7	DSS	0.595618	0.591099	1.24923	Mutant	7	351	199713
GBM	NOD2	PFS	0.683936	0.677317	1.34418	Mutant	3	397	64127
GBM	TIRAP	PFS	0.703764	0.703124	1.24789	Mutant	3	397	114609
GBM	PRKACA	OS	0.713845	0.714891	0.771523	WT	5	392	5566
GBM	PLCG1	OS	0.714553	0.713724	0.859457	WT	6	391	5335
GBM	NLRP2	OS	0.732651	0.735077	1.14998	Mutant	9	388	55655
GBM	NLRP1	DSS	0.7459	0.748255	1.20517	Mutant	5	353	22861
GBM	PLCG1	DSS	0.781167	0.779785	0.890801	WT	6	352	5335
GBM	PRKACA	DSS	0.783568	0.784166	0.823162	WT	5	353	5566
GBM	CASP1	DSS	0.852271	0.854238	1.11276	Mutant	5	353	834
GBM	NLRP7	OS	0.888768	0.885959	1.04982	Mutant	10	387	199713
GBM	NLRP3	OS	0.937295	0.937126	1.02872	Mutant	10	387	114548
GBM	CASP1	OS	0.94479	0.946408	1.03983	Mutant	5	392	834
GBM	NLRP3	PFS	0.949827	0.947558	1.02385	Mutant	10	390	114548
HNSC	NLRP6	OS	2.5798e-05	0.000189649	5.58486	Mutant	7	501	171389
HNSC	NLRP6	DSS	0.00126166	0.00416977	5.48617	Mutant	5	414	171389
HNSC	NLRP6	PFS	0.00890948	0.0130159	3.09717	Mutant	7	502	171389
HNSC	CASP5	PFS	0.06464	0.992163	1.10116e-07	WT	5	504	838
HNSC	NLRP1	DSS	0.0658465	0.992287	1.07248e-07	WT	7	412	22861
HNSC	CASP6	DSS	0.0724121	0.0850878	2.74317	Mutant	5	414	839
HNSC	PLCG1	DSS	0.0820526	0.0897209	2.17143	Mutant	9	410	5335
HNSC	PRKACA	DSS	0.0827782	0.0954627	2.65188	Mutant	4	415	5566
HNSC	NLRP3	DSS	0.0855996	0.0914725	1.92876	Mutant	13	406	114548
HNSC	CASP8	OS	0.0903974	0.0921594	1.42473	Mutant	55	453	841
HNSC	NOD1	PFS	0.0938143	0.0996108	1.8802	Mutant	9	500	10392
HNSC	CASP8	PFS	0.110344	0.11172	1.34542	Mutant	55	454	841
HNSC	CASP5	OS	0.113817	0.993288	1.10315e-07	WT	5	503	838
HNSC	NLRP7	PFS	0.136688	0.142766	0.545761	WT	16	493	199713
HNSC	NOD1	DSS	0.157093	0.994011	1.09571e-07	WT	6	413	10392
HNSC	CASP5	DSS	0.178808	0.994302	1.09903e-07	WT	5	414	838
HNSC	NLRP1	OS	0.191871	0.202072	0.475648	WT	10	498	22861
HNSC	GSDMD	DSS	0.249839	0.992456	2.99186e-07	WT	3	416	79792
HNSC	NLRP7	OS	0.250366	0.25573	0.597764	WT	16	492	199713
HNSC	PRKACA	OS	0.252598	0.261303	1.92286	Mutant	4	504	5566
HNSC	CASP6	OS	0.258252	0.266248	1.91116	Mutant	5	503	839
HNSC	NLRC4	PFS	0.282861	0.287306	1.55276	Mutant	9	500	58484
HNSC	PLCG1	PFS	0.301835	0.304171	1.44648	Mutant	11	498	5335
HNSC	NOD2	PFS	0.304545	0.324062	0.372222	WT	4	505	64127
HNSC	NLRP3	OS	0.318494	0.321235	1.40237	Mutant	15	493	114548
HNSC	CASP4	PFS	0.35952	0.365487	1.69193	Mutant	3	506	837
HNSC	NLRP3	PFS	0.383619	0.385296	1.32335	Mutant	15	494	114548
HNSC	PLCG1	OS	0.392226	0.394329	1.38771	Mutant	11	497	5335
HNSC	CASP8	DFI	0.404789	0.408699	1.56542	Mutant	13	102	841
HNSC	GSDMC	DSS	0.421449	0.994701	3.03056e-07	WT	3	416	56169
HNSC	PRKACA	PFS	0.42491	0.427962	1.58502	Mutant	4	505	5566
HNSC	NLRP7	DFI	0.437545	0.99674	1.07612e-07	WT	3	112	199713
HNSC	CASP6	PFS	0.487825	0.48991	1.49394	Mutant	5	504	839
HNSC	NOD2	OS	0.49005	0.498264	0.507101	WT	4	504	64127
HNSC	NLRP7	DSS	0.494897	0.497453	0.708113	WT	15	404	199713
HNSC	GSDMD	OS	0.517163	0.524183	0.527907	WT	4	504	79792
HNSC	CASP4	OS	0.548364	0.554124	0.552509	WT	3	505	837
HNSC	NLRC4	OS	0.552593	0.553959	1.34875	Mutant	9	499	58484
HNSC	NLRP2	PFS	0.600667	0.600744	1.22212	Mutant	13	496	55655
HNSC	CASP8	DSS	0.613103	0.613747	1.15388	Mutant	43	376	841
HNSC	GSDMC	OS	0.614679	0.618268	0.606668	WT	4	504	56169
HNSC	SCAF11	OS	0.660317	0.660723	1.29108	Mutant	6	502	9169
HNSC	NLRP2	OS	0.683521	0.683925	1.2025	Mutant	13	495	55655
HNSC	SCAF11	DSS	0.702007	0.704492	0.68311	WT	4	415	9169
HNSC	NOD1	OS	0.711064	0.711368	0.806332	WT	9	499	10392
HNSC	NOD2	DSS	0.712109	0.713568	0.691677	WT	4	415	64127
HNSC	GSDME	PFS	0.726979	0.727864	1.22408	Mutant	4	505	1687
HNSC	NOD1	DFI	0.733176	0.734455	1.41551	Mutant	3	112	10392
HNSC	CASP4	DSS	0.765375	0.76612	0.741701	WT	3	416	837
HNSC	NLRP2	DSS	0.789988	0.789773	1.1687	Mutant	11	408	55655
HNSC	NLRC4	DSS	0.826238	0.826696	1.16902	Mutant	7	412	58484
HNSC	SCAF11	PFS	0.872067	0.87241	0.910908	WT	6	503	9169
HNSC	GSDMD	PFS	0.907884	0.908189	0.921331	WT	4	505	79792
HNSC	GSDME	OS	0.927767	0.92803	1.06632	Mutant	4	504	1687
HNSC	GSDMC	PFS	0.943509	0.943897	1.05125	Mutant	4	505	56169
HNSC	PLCG1	DFI	0.966184	0.966186	0.957671	WT	4	111	5335
HNSC	NLRP1	PFS	0.995835	0.995252	0.997719	WT	10	499	22861
KIRC	NLRP2	PFS	1.6786e-06	0.000105405	10.0842	Mutant	4	364	55655
KIRC	NLRP2	DSS	0.0207856	0.0353374	4.5517	Mutant	4	328	55655
KIRC	SCAF11	DSS	0.0303856	0.0466485	4.20093	Mutant	3	329	9169
KIRC	SCAF11	OS	0.0363054	0.0478011	3.20843	Mutant	4	366	9169
KIRC	NLRP2	OS	0.100371	0.118648	3.05564	Mutant	4	366	55655
KIRC	SCAF11	PFS	0.153259	0.16486	2.25749	Mutant	4	364	9169
KIRC	GPX4	OS	0.253072	0.995159	1.09732e-07	WT	3	367	2879
KIRC	GPX4	DSS	0.343953	0.995992	1.09697e-07	WT	3	329	2879
KIRC	NOD2	PFS	0.358571	0.993957	3.02077e-07	WT	3	365	64127
KIRC	NLRP1	DSS	0.439585	0.450587	2.14165	Mutant	3	329	22861
KIRC	NOD2	OS	0.465286	0.995189	3.02643e-07	WT	3	367	64127
KIRC	NOD2	DSS	0.536511	0.995929	3.02422e-07	WT	3	329	64127
KIRC	NLRP1	OS	0.660388	0.662979	1.55043	Mutant	3	367	22861
KIRC	GPX4	PFS	0.753722	0.743952	1.26266	Mutant	3	365	2879
KIRC	NLRP1	PFS	0.948694	0.947706	1.06813	Mutant	3	365	22861
KIRP	NLRP7	PFS	0.18746	0.198301	2.16631	Mutant	4	276	199713
KIRP	GSDME	PFS	0.222352	0.994966	1.02877e-07	WT	3	277	1687
KIRP	GSDME	DFI	0.237056	0.997118	3.02916e-08	WT	3	168	1687
KIRP	NLRP6	PFS	0.307761	0.995705	1.0827e-07	WT	3	277	171389
KIRP	NLRP1	PFS	0.352447	0.361125	1.93057	Mutant	4	276	22861
KIRP	NLRP7	DSS	0.382018	0.396754	2.38095	Mutant	3	263	199713
KIRP	SCAF11	PFS	0.392187	0.996375	1.09775e-07	WT	4	276	9169
KIRP	GSDME	OS	0.401447	0.996469	1.08056e-07	WT	3	278	1687
KIRP	NLRP6	OS	0.427842	0.996664	1.08004e-07	WT	3	278	171389
KIRP	NLRP7	OS	0.480926	0.485619	1.66565	Mutant	4	277	199713
KIRP	SCAF11	DFI	0.509682	0.997223	1.08362e-07	WT	4	167	9169
KIRP	GSDME	DSS	0.543039	0.997421	1.09969e-07	WT	3	263	1687
KIRP	NOD1	OS	0.547654	0.553636	1.82438	Mutant	3	278	10392
KIRP	SCAF11	OS	0.557398	0.996156	2.98799e-07	WT	4	277	9169
KIRP	SCAF11	DSS	0.573201	0.997614	1.09688e-07	WT	4	262	9169
KIRP	NLRP6	DSS	0.583908	0.997674	1.10368e-07	WT	3	263	171389
KIRP	NLRP1	DSS	0.589574	0.997709	1.1042e-07	WT	3	263	22861
KIRP	NLRP1	OS	0.64344	0.646418	1.59297	Mutant	4	277	22861
KIRP	NOD1	PFS	0.925771	0.925841	1.09847	Mutant	3	277	10392
LGG	PLCG1	PFS	0.000349095	0.00133848	5.08297	Mutant	5	519	5335
LGG	NLRC4	PFS	0.0744389	0.0868729	2.71348	Mutant	3	521	58484
LGG	NLRP2	PFS	0.101581	0.110816	2.24205	Mutant	7	517	55655
LGG	NLRP1	OS	0.110436	0.993459	1.01533e-07	WT	4	520	22861
LGG	NLRP1	DSS	0.122208	0.993676	1.01227e-07	WT	4	507	22861
LGG	PJVK	PFS	0.151236	0.163059	2.25473	Mutant	4	520	494513
LGG	NLRP2	OS	0.213869	0.240397	0.305506	WT	7	517	55655
LGG	NLRP2	DSS	0.242512	0.266769	0.325334	WT	7	504	55655
LGG	NLRP1	PFS	0.320854	0.328045	1.76838	Mutant	4	520	22861
LGG	NLRC4	OS	0.369849	0.384475	0.413785	WT	3	521	58484
LGG	NLRP7	OS	0.372074	0.386396	0.536092	WT	5	519	199713
LGG	SCAF11	PFS	0.391536	0.399277	1.82237	Mutant	3	521	9169
LGG	SCAF11	OS	0.413187	0.424983	0.444422	WT	3	521	9169
LGG	NLRC4	DSS	0.418039	0.429498	0.447987	WT	3	508	58484
LGG	NLRP7	DSS	0.428905	0.442868	0.5749	WT	5	506	199713
LGG	SCAF11	DSS	0.459636	0.468652	0.478106	WT	3	508	9169
LGG	PLCG1	DSS	0.469761	0.478457	1.53708	Mutant	5	506	5335
LGG	CASP8	DSS	0.535696	0.527474	1.38517	Mutant	5	506	841
LGG	PLCG1	OS	0.555485	0.562518	1.4186	Mutant	5	519	5335
LGG	NLRP7	PFS	0.633522	0.616682	1.2899	Mutant	5	519	199713
LGG	CASP8	OS	0.650359	0.641445	1.27026	Mutant	5	519	841
LGG	CASP8	PFS	0.697964	0.683238	1.2061	Mutant	5	519	841
LGG	PJVK	OS	0.775379	0.775976	0.813452	WT	4	520	494513
LGG	PJVK	DSS	0.852267	0.852484	0.873499	WT	4	507	494513
LIHC	NLRP2	OS	0.00290131	0.00604983	4.07483	Mutant	7	357	55655
LIHC	NLRP2	PFS	0.00762333	0.0113958	3.1552	Mutant	7	357	55655
LIHC	PLCG1	DSS	0.0222417	0.0372931	4.51893	Mutant	5	311	5335
LIHC	CASP4	PFS	0.0283116	0.0390646	3.33643	Mutant	4	360	837
LIHC	PLCG1	PFS	0.0376472	0.0437642	2.49846	Mutant	6	358	5335
LIHC	GSDMC	OS	0.0388196	0.0504718	3.14876	Mutant	4	360	56169
LIHC	PLCG1	OS	0.0388867	0.0506696	3.16655	Mutant	6	358	5335
LIHC	NLRP2	DFI	0.0626921	0.0751035	2.83322	Mutant	5	271	55655
LIHC	CASP4	OS	0.0698433	0.0885045	3.40403	Mutant	4	360	837
LIHC	NLRC4	DFI	0.101724	0.120129	3.03635	Mutant	3	273	58484
LIHC	NLRP6	OS	0.178379	0.19439	2.53021	Mutant	4	360	171389
LIHC	NLRP7	OS	0.184099	0.212986	0.286136	WT	7	357	199713
LIHC	CASP3	OS	0.198023	0.994567	1.0884e-07	WT	3	361	836
LIHC	NLRP6	PFS	0.202095	0.211595	2.07019	Mutant	4	360	171389
LIHC	CASP4	DSS	0.220718	0.247624	3.24375	Mutant	3	313	837
LIHC	NLRC4	PFS	0.2439	0.257236	2.24038	Mutant	3	361	58484
LIHC	PLCG1	DFI	0.248841	0.257104	1.94107	Mutant	5	271	5335
LIHC	NLRP6	DFI	0.272658	0.284091	2.14802	Mutant	3	273	171389
LIHC	CASP3	DSS	0.281778	0.995463	1.08515e-07	WT	3	313	836
LIHC	NOD2	DFI	0.295359	0.316017	0.365494	WT	4	272	64127
LIHC	NLRP7	DFI	0.319477	0.313564	1.67002	Mutant	5	271	199713
LIHC	NLRP7	DSS	0.359596	0.37538	0.409365	WT	7	309	199713
LIHC	NLRP6	DSS	0.367523	0.383167	2.41116	Mutant	3	313	171389
LIHC	NLRP3	OS	0.407925	0.420554	0.445165	WT	8	356	114548
LIHC	NOD2	PFS	0.440174	0.445914	0.581738	WT	5	359	64127
LIHC	NLRP7	PFS	0.482179	0.476256	1.34408	Mutant	7	357	199713
LIHC	GSDMC	PFS	0.495281	0.498343	1.48308	Mutant	4	360	56169
LIHC	NLRP2	DSS	0.497426	0.505775	1.95745	Mutant	4	312	55655
LIHC	NLRP3	PFS	0.674879	0.675472	0.783781	WT	8	356	114548
LIHC	NLRP3	DSS	0.678303	0.680354	0.660179	WT	8	308	114548
LIHC	NLRC4	OS	0.776692	0.777305	0.752448	WT	3	361	58484
LIHC	CASP3	DFI	0.791933	0.785746	1.21404	Mutant	3	273	836
LIHC	NOD2	OS	0.843979	0.844385	1.15044	Mutant	5	359	64127
LIHC	NOD2	DSS	0.852071	0.852143	0.828725	WT	4	312	64127
LIHC	CASP3	PFS	0.94598	0.950483	0.956793	WT	3	361	836
LIHC	NLRP3	DFI	0.956296	0.955586	0.961068	WT	4	272	114548
LIHC	NLRC4	DSS	0.96125	0.961439	1.04999	Mutant	3	313	58484
LUAD	GSDMC	DSS	3.5085e-05	0.000232838	5.44678	Mutant	8	431	56169
LUAD	GSDMC	PFS	4.364e-05	0.000173195	4.2733	Mutant	8	500	56169
LUAD	GSDMC	OS	0.0019993	0.00397018	3.71639	Mutant	8	500	56169
LUAD	PJVK	DFI	0.00510949	0.0140585	6.01557	Mutant	4	273	494513
LUAD	GSDMA	DFI	0.040303	0.0487468	2.76532	Mutant	6	271	284110
LUAD	CASP4	DFI	0.0534001	0.0708283	3.67114	Mutant	3	274	837
LUAD	CASP9	PFS	0.0589253	0.0665299	2.2982	Mutant	5	503	842
LUAD	NLRP2	DSS	0.0589462	0.0646729	2.06191	Mutant	21	418	55655
LUAD	NLRP2	OS	0.0678386	0.0710179	1.68257	Mutant	27	481	55655
LUAD	AIM2	PFS	0.0722764	0.0903142	0.298457	WT	8	500	9447
LUAD	PJVK	DSS	0.0736276	0.0921095	3.33841	Mutant	4	435	494513
LUAD	AIM2	DFI	0.0778169	0.995357	3.69578e-08	WT	4	273	9447
LUAD	AIM2	OS	0.0846605	0.118696	0.20847	WT	8	500	9447
LUAD	NLRP2	DFI	0.0997216	0.106267	1.98308	Mutant	13	264	55655
LUAD	NLRC4	DSS	0.111247	0.118269	2.04516	Mutant	8	431	58484
LUAD	GSDMA	OS	0.122203	0.993453	1.09794e-07	WT	7	501	284110
LUAD	NLRP2	PFS	0.132075	0.134391	1.47262	Mutant	27	481	55655
LUAD	CASP9	DFI	0.141413	0.157802	2.7582	Mutant	3	274	842
LUAD	GSDMA	PFS	0.145369	0.151701	1.91515	Mutant	7	501	284110
LUAD	PRKACA	PFS	0.16444	0.990855	3.01653e-07	WT	3	505	5566
LUAD	GSDMA	DSS	0.183589	0.994376	1.09371e-07	WT	7	432	284110
LUAD	NOD1	DSS	0.208413	0.222126	2.39315	Mutant	6	433	10392
LUAD	NLRP1	DFI	0.20862	0.235687	0.303267	WT	8	269	22861
LUAD	NLRC4	OS	0.210222	0.214107	1.61542	Mutant	10	498	58484
LUAD	GSDMB	OS	0.220717	0.234695	2.33296	Mutant	3	505	55876
LUAD	AIM2	DSS	0.226871	0.252432	0.315783	WT	8	431	9447
LUAD	NLRP7	OS	0.23678	0.239742	0.681945	WT	31	477	199713
LUAD	PJVK	OS	0.240636	0.247585	1.79582	Mutant	6	502	494513
LUAD	NLRP7	PFS	0.246113	0.248016	0.735082	WT	31	477	199713
LUAD	NLRP7	DSS	0.251414	0.255782	0.620363	WT	27	412	199713
LUAD	PRKACA	DFI	0.286016	0.995477	1.10009e-07	WT	3	274	5566
LUAD	NOD1	OS	0.29973	0.306499	1.81541	Mutant	7	501	10392
LUAD	PRKACA	OS	0.31793	0.993422	3.02461e-07	WT	3	505	5566
LUAD	CASP5	DSS	0.333129	0.350673	0.391478	WT	10	429	838
LUAD	CASP4	DSS	0.356446	0.365008	1.91288	Mutant	5	434	837
LUAD	NLRP7	DFI	0.369093	0.372705	0.663087	WT	18	259	199713
LUAD	NLRC4	PFS	0.369306	0.371311	1.4093	Mutant	10	498	58484
LUAD	SCAF11	DFI	0.370624	0.376441	1.6831	Mutant	6	271	9169
LUAD	CASP4	PFS	0.378503	0.383535	1.66135	Mutant	5	503	837
LUAD	PRKACA	DSS	0.390405	0.994347	3.01981e-07	WT	3	436	5566
LUAD	NLRP6	PFS	0.419979	0.423119	0.667603	WT	9	499	171389
LUAD	GSDME	OS	0.435845	0.441485	0.578117	WT	8	500	1687
LUAD	PLCG1	DSS	0.448147	0.458513	0.47475	WT	6	433	5335
LUAD	GSDMD	OS	0.454702	0.464683	0.480168	WT	6	502	79792
LUAD	CASP1	PFS	0.455275	0.458832	0.648583	WT	6	502	834
LUAD	NLRP1	OS	0.464963	0.46642	1.28399	Mutant	17	491	22861
LUAD	CASP9	DSS	0.473993	0.478851	1.65884	Mutant	5	434	842
LUAD	NOD1	PFS	0.474713	0.477807	1.43056	Mutant	7	501	10392
LUAD	SCAF11	DSS	0.479299	0.482682	1.50922	Mutant	10	429	9169
LUAD	ELANE	PFS	0.494108	0.502075	0.510213	WT	3	505	1991
LUAD	CASP5	PFS	0.520357	0.521322	1.27899	Mutant	13	495	838
LUAD	CASP3	DSS	0.526082	0.529751	1.56722	Mutant	6	433	836
LUAD	CASP3	DFI	0.548036	0.551531	1.53248	Mutant	5	272	836
LUAD	GSDMD	DFI	0.55835	0.56092	1.7976	Mutant	3	274	79792
LUAD	PJVK	PFS	0.561627	0.559567	1.34232	Mutant	6	502	494513
LUAD	NLRP6	OS	0.566785	0.568434	0.717326	WT	9	499	171389
LUAD	SCAF11	PFS	0.573008	0.572011	1.2634	Mutant	11	497	9169
LUAD	NLRP3	DSS	0.584687	0.585521	1.16857	Mutant	50	389	114548
LUAD	PLCG1	PFS	0.600748	0.601362	0.789598	WT	9	499	5335
LUAD	CASP4	OS	0.621262	0.623307	1.41926	Mutant	5	503	837
LUAD	CASP1	DSS	0.633069	0.634924	1.40438	Mutant	5	434	834
LUAD	CASP8	OS	0.635025	0.638079	0.623714	WT	4	504	841
LUAD	NLRP1	PFS	0.65314	0.652988	0.864444	WT	17	491	22861
LUAD	GSDME	DSS	0.665126	0.667482	0.649271	WT	7	432	1687
LUAD	GSDMD	PFS	0.667143	0.666966	1.28418	Mutant	6	502	79792
LUAD	GSDMD	DSS	0.667288	0.669572	0.651157	WT	6	433	79792
LUAD	CASP8	PFS	0.684779	0.682651	1.26846	Mutant	4	504	841
LUAD	GSDMB	PFS	0.687217	0.688832	1.32912	Mutant	3	505	55876
LUAD	GSDME	DFI	0.68874	0.688343	1.26634	Mutant	7	270	1687
LUAD	PLCG1	DFI	0.698413	0.700073	0.678592	WT	3	274	5335
LUAD	SCAF11	OS	0.700064	0.700846	1.21488	Mutant	11	497	9169
LUAD	NOD2	OS	0.716125	0.71669	1.15028	Mutant	15	493	64127
LUAD	NLRP3	DFI	0.717309	0.718004	0.874733	WT	25	252	114548
LUAD	GSDME	PFS	0.730495	0.73137	0.840765	WT	8	500	1687
LUAD	NLRP3	PFS	0.751827	0.752168	0.93779	WT	56	452	114548
LUAD	NLRC4	DFI	0.753878	0.754693	1.25108	Mutant	5	272	58484
LUAD	CASP9	OS	0.775167	0.775765	1.22483	Mutant	5	503	842
LUAD	NLRP1	DSS	0.780086	0.780498	1.15272	Mutant	12	427	22861
LUAD	CASP3	PFS	0.786771	0.787672	1.16957	Mutant	6	502	836
LUAD	ELANE	OS	0.812831	0.813151	0.788874	WT	3	505	1991
LUAD	CASP3	OS	0.83418	0.834544	1.1604	Mutant	6	502	836
LUAD	NOD2	PFS	0.837565	0.838663	1.07158	Mutant	15	493	64127
LUAD	CASP1	OS	0.841302	0.841717	0.889701	WT	6	502	834
LUAD	CASP5	OS	0.844362	0.844183	0.905283	WT	13	495	838
LUAD	NLRP6	DSS	0.865159	0.865049	0.885764	WT	8	431	171389
LUAD	NLRP3	OS	0.870596	0.871183	1.0392	Mutant	56	452	114548
LUAD	CASP8	DSS	0.87476	0.874751	0.853416	WT	4	435	841
LUAD	NOD2	DSS	0.881039	0.880859	0.915959	WT	11	428	64127
LUAD	ELANE	DFI	0.892998	0.892836	0.873149	WT	3	274	1991
LUAD	NOD2	DFI	0.89647	0.896828	1.09734	Mutant	5	272	64127
LUAD	PLCG1	OS	0.915211	0.915464	1.05519	Mutant	9	499	5335
LUAD	CASP5	DFI	0.947041	0.944314	1.0513	Mutant	7	270	838
LUAD	NLRP6	DFI	0.961401	0.962222	0.966683	WT	6	271	171389
LUAD	ELANE	DSS	0.966052	0.96621	1.0435	Mutant	3	436	1991
LUSC	CASP5	OS	0.000296828	0.000728539	3.68559	Mutant	8	471	838
LUSC	CASP5	PFS	0.00141864	0.00251651	3.1999	Mutant	8	472	838
LUSC	NLRC4	DFI	0.00244225	0.00525383	4.28293	Mutant	5	237	58484
LUSC	PLCG1	OS	0.00348598	0.0105892	6.2189	Mutant	3	476	5335
LUSC	SCAF11	DSS	0.00740831	0.0114386	3.23606	Mutant	8	349	9169
LUSC	AIM2	DSS	0.0118842	0.0199805	3.94909	Mutant	5	352	9447
LUSC	SCAF11	OS	0.0161468	0.0189344	2.14823	Mutant	13	466	9169
LUSC	NOD2	DFI	0.0237445	0.0302921	2.75896	Mutant	9	233	64127
LUSC	PLCG1	PFS	0.0275394	0.0428127	4.23414	Mutant	3	477	5335
LUSC	PJVK	DSS	0.0580098	0.0923892	5.51734	Mutant	3	354	494513
LUSC	NLRP1	DFI	0.0776814	0.0907761	2.73455	Mutant	5	237	22861
LUSC	SCAF11	PFS	0.0879028	0.0920389	1.72554	Mutant	13	467	9169
LUSC	AIM2	OS	0.0975882	0.105403	2.08389	Mutant	7	472	9447
LUSC	AIM2	PFS	0.130689	0.137899	1.95738	Mutant	7	473	9447
LUSC	GSDMA	OS	0.139712	0.156933	2.74058	Mutant	4	475	284110
LUSC	NOD1	OS	0.145916	0.161456	0.361974	WT	7	472	10392
LUSC	IL6	PFS	0.192601	0.991429	3.01653e-07	WT	3	477	3569
LUSC	GSDMD	PFS	0.199169	0.226077	0.293034	WT	3	477	79792
LUSC	PJVK	OS	0.237493	0.246586	1.96499	Mutant	5	474	494513
LUSC	NLRP1	PFS	0.247367	0.251361	1.55342	Mutant	9	471	22861
LUSC	TNF	PFS	0.247401	0.252576	1.67829	Mutant	5	475	7124
LUSC	AIM2	DFI	0.25702	0.280687	2.97693	Mutant	3	239	9447
LUSC	GSDMA	PFS	0.257684	0.269342	2.19381	Mutant	4	476	284110
LUSC	IL6	OS	0.259519	0.992579	3.01992e-07	WT	3	476	3569
LUSC	IL1B	DSS	0.263496	0.275882	2.20136	Mutant	3	354	3553
LUSC	NOD1	DSS	0.266826	0.995319	1.08544e-07	WT	5	352	10392
LUSC	NLRP1	DSS	0.285518	0.293513	1.85861	Mutant	6	351	22861
LUSC	GSDMD	OS	0.289902	0.310327	0.358967	WT	3	476	79792
LUSC	GSDME	DSS	0.29269	0.301494	2.09755	Mutant	3	354	1687
LUSC	NLRP7	DFI	0.293861	0.298858	1.62536	Mutant	14	228	199713
LUSC	CASP1	DSS	0.310679	0.321096	2.03814	Mutant	6	351	834
LUSC	CASP8	DFI	0.328003	0.33786	1.99785	Mutant	4	238	841
LUSC	NOD1	PFS	0.34394	0.348642	0.616301	WT	7	473	10392
LUSC	SCAF11	DFI	0.344774	0.353967	1.95174	Mutant	5	237	9169
LUSC	NLRP6	DSS	0.382473	0.994267	3.00196e-07	WT	5	352	171389
LUSC	PJVK	PFS	0.383994	0.389303	1.65084	Mutant	5	475	494513
LUSC	IL6	DSS	0.388231	0.994332	3.00748e-07	WT	3	354	3569
LUSC	NLRP2	OS	0.397528	0.400226	0.683111	WT	16	463	55655
LUSC	NLRP7	PFS	0.405329	0.406903	1.24772	Mutant	27	453	199713
LUSC	IL6	DFI	0.41199	0.996521	1.10086e-07	WT	3	239	3569
LUSC	NLRP3	DSS	0.439812	0.442553	0.674201	WT	24	333	114548
LUSC	NLRC4	PFS	0.455401	0.455483	1.30813	Mutant	13	467	58484
LUSC	NLRP7	DSS	0.466211	0.468468	1.35993	Mutant	23	334	199713
LUSC	CASP8	DSS	0.47711	0.485985	0.49587	WT	7	350	841
LUSC	NLRP2	DSS	0.479367	0.483828	0.605684	WT	13	344	55655
LUSC	GSDMC	PFS	0.505083	0.509413	0.625796	WT	4	476	56169
LUSC	IL1B	PFS	0.510916	0.513279	0.67867	WT	4	476	3553
LUSC	TNF	DSS	0.578063	0.583165	1.7394	Mutant	3	354	7124
LUSC	CASP8	OS	0.585045	0.585787	0.781049	WT	11	468	841
LUSC	NLRP2	PFS	0.586807	0.586782	1.20296	Mutant	16	464	55655
LUSC	NLRC4	DSS	0.596054	0.598075	0.684524	WT	9	348	58484
LUSC	CASP4	DSS	0.597244	0.599729	1.45664	Mutant	6	351	837
LUSC	NLRP1	OS	0.61512	0.615635	1.23185	Mutant	9	470	22861
LUSC	GSDME	OS	0.618357	0.618477	1.33629	Mutant	4	475	1687
LUSC	GSDMC	OS	0.618383	0.620069	0.702825	WT	4	475	56169
LUSC	CASP8	PFS	0.633749	0.634284	0.821065	WT	11	469	841
LUSC	NLRP6	OS	0.641563	0.644429	0.629308	WT	6	473	171389
LUSC	TNF	OS	0.654801	0.655186	1.29696	Mutant	5	474	7124
LUSC	CASP1	OS	0.7024	0.703108	1.21247	Mutant	8	471	834
LUSC	NLRP3	OS	0.711691	0.711695	0.91261	WT	38	441	114548
LUSC	NLRC4	OS	0.722748	0.722731	0.862999	WT	13	466	58484
LUSC	IL1B	OS	0.728155	0.7285	0.814674	WT	4	475	3553
LUSC	NLRP6	DFI	0.744775	0.746124	1.38713	Mutant	3	239	171389
LUSC	GSDMC	DFI	0.794528	0.795332	1.29967	Mutant	3	239	56169
LUSC	NLRP3	DFI	0.799567	0.800044	1.14014	Mutant	14	228	114548
LUSC	CASP4	DFI	0.804667	0.80531	1.28259	Mutant	3	239	837
LUSC	NOD2	PFS	0.826769	0.826489	1.06748	Mutant	18	462	64127
LUSC	NLRP2	DFI	0.834235	0.833259	1.13296	Mutant	11	231	55655
LUSC	CASP4	OS	0.841855	0.84223	1.12292	Mutant	7	472	837
LUSC	NOD2	DSS	0.845576	0.844328	1.12255	Mutant	11	346	64127
LUSC	CASP4	PFS	0.879905	0.880099	0.916042	WT	7	473	837
LUSC	NLRP6	PFS	0.880825	0.880485	0.898628	WT	6	474	171389
LUSC	NOD2	OS	0.88107	0.880008	1.053	Mutant	18	461	64127
LUSC	GSDME	PFS	0.884798	0.884499	1.08813	Mutant	4	476	1687
LUSC	NLRP7	OS	0.92585	0.925738	0.970189	WT	27	452	199713
LUSC	GSDMC	DSS	0.937836	0.937591	0.92411	WT	3	354	56169
LUSC	NOD1	DFI	0.972306	0.97424	0.967859	WT	4	238	10392
LUSC	CASP1	PFS	0.988267	0.98891	0.993008	WT	8	472	834
LUSC	NLRP3	PFS	0.995982	0.995469	0.998726	WT	38	442	114548
MESO	NLRP7	OS	2.15683e-12	6.6194e-06	34.6798	Mutant	3	78	199713
MESO	NLRP7	DSS	3.09338e-08	8.0021e-05	22.2452	Mutant	3	51	199713
OV	CASP6	DFI	0.0171453	0.0430506	8.22223	Mutant	3	197	839
OV	CASP8	PFS	0.114108	0.147319	0.234039	WT	3	405	841
OV	AIM2	PFS	0.135308	0.145264	2.08644	Mutant	5	403	9447
OV	AIM2	DSS	0.14232	0.151791	2.06679	Mutant	5	371	9447
OV	AIM2	OS	0.172094	0.181017	1.96693	Mutant	5	403	9447
OV	NLRP3	PFS	0.217654	0.22094	0.659554	WT	14	394	114548
OV	NOD2	PFS	0.218393	0.22806	0.496516	WT	6	402	64127
OV	CASP6	DSS	0.226391	0.252405	3.17291	Mutant	3	373	839
OV	NLRP2	OS	0.262936	0.285617	0.342813	WT	5	403	55655
OV	NLRP2	DSS	0.275267	0.297006	0.351348	WT	5	371	55655
OV	NLRP3	OS	0.278716	0.282132	0.678194	WT	14	394	114548
OV	GSDMB	DSS	0.280943	0.292484	2.12001	Mutant	3	373	55876
OV	CASP6	OS	0.286411	0.307743	2.79448	Mutant	3	405	839
OV	GSDMB	OS	0.30941	0.31979	2.03281	Mutant	3	405	55876
OV	NOD2	OS	0.335708	0.34514	0.511351	WT	6	402	64127
OV	NOD2	DSS	0.36492	0.372711	0.530605	WT	6	370	64127
OV	NLRP3	DSS	0.373111	0.376604	0.69247	WT	12	364	114548
OV	NOD2	DFI	0.415502	0.420806	0.624333	WT	6	194	64127
OV	CASP6	PFS	0.424054	0.431744	2.20791	Mutant	3	405	839
OV	NLRP3	DFI	0.477251	0.479034	1.51329	Mutant	5	195	114548
OV	SCAF11	PFS	0.478229	0.482447	0.606935	WT	3	405	9169
OV	CASP8	OS	0.480589	0.489165	0.499883	WT	3	405	841
OV	SCAF11	OS	0.662573	0.666241	0.735862	WT	3	405	9169
OV	GSDMB	PFS	0.680693	0.682582	0.747975	WT	3	405	55876
OV	NLRC4	DFI	0.694734	0.697555	1.47998	Mutant	3	197	58484
OV	PLCG1	OS	0.733224	0.733009	0.819872	WT	4	404	5335
OV	NLRC4	DSS	0.795191	0.796022	1.29635	Mutant	3	373	58484
OV	NLRP2	DFI	0.80453	0.806004	1.15459	Mutant	3	197	55655
OV	NLRC4	OS	0.842083	0.842625	1.22048	Mutant	3	405	58484
OV	NLRC4	PFS	0.850748	0.850378	0.827621	WT	3	405	58484
OV	NLRP2	PFS	0.854596	0.853531	0.898294	WT	5	403	55655
OV	PLCG1	PFS	0.950617	0.949468	0.968439	WT	4	404	5335
PAAD	GSDMD	PFS	0.349436	0.35457	1.93945	Mutant	3	175	79792
PAAD	GSDMD	DSS	0.756522	0.757826	1.36502	Mutant	3	154	79792
PAAD	GSDMD	OS	0.902027	0.902389	1.13148	Mutant	3	175	79792
PRAD	NOD1	PFS	7.51663e-06	0.000509182	12.519	Mutant	3	495	10392
PRAD	NLRP3	PFS	0.421352	0.433391	2.2007	Mutant	4	494	114548
PRAD	NLRP3	OS	0.854859	0.998795	3.02663e-07	WT	4	494	114548
PRAD	NOD1	OS	0.893948	0.998645	8.26777e-07	WT	3	495	10392
PRAD	NLRP3	DSS	0.906843	0.998814	8.22589e-07	WT	4	489	114548
PRAD	NOD1	DSS	0.929026	0.999095	8.26267e-07	WT	3	490	10392
READ	CASP8	PFS	0.165315	0.996324	3.77784e-08	WT	4	144	841
READ	NLRP3	PFS	0.223586	0.996736	3.87961e-08	WT	5	143	114548
READ	CASP5	PFS	0.235963	0.996852	3.80193e-08	WT	3	145	838
READ	CASP8	OS	0.263796	0.997051	3.74471e-08	WT	4	144	841
READ	NLRC4	PFS	0.281427	0.997094	3.93469e-08	WT	4	144	58484
READ	NLRP7	DSS	0.311674	0.33267	2.7947	Mutant	6	130	199713
READ	CASP5	OS	0.31284	0.99734	3.73378e-08	WT	3	145	838
READ	GSDMC	PFS	0.321352	0.997315	3.96541e-08	WT	3	145	56169
READ	SCAF11	PFS	0.341116	0.995994	1.08154e-07	WT	4	144	9169
READ	NLRP3	OS	0.414484	0.997807	3.89737e-08	WT	5	143	114548
READ	CASP8	DSS	0.434904	0.997927	3.78785e-08	WT	4	132	841
READ	NOD2	OS	0.464764	0.996927	1.07817e-07	WT	3	145	64127
READ	NLRC4	OS	0.478298	0.997024	1.07462e-07	WT	4	144	58484
READ	CASP5	DSS	0.504708	0.998226	3.79788e-08	WT	3	133	838
READ	GSDMC	OS	0.509716	0.997225	1.08206e-07	WT	3	145	56169
READ	NLRP3	DSS	0.518182	0.998268	3.87476e-08	WT	5	131	114548
READ	NOD2	DSS	0.546378	0.998373	3.93032e-08	WT	3	133	64127
READ	NLRC4	DFI	0.554445	0.999002	1.36407e-08	WT	3	38	58484
READ	NLRP3	DFI	0.554445	0.999002	1.36407e-08	WT	3	38	114548
READ	NLRP7	DFI	0.554445	0.999002	1.36407e-08	WT	3	38	199713
READ	NLRC4	DSS	0.578416	0.9985	3.93791e-08	WT	4	132	58484
READ	NOD2	DFI	0.579126	0.584584	1.81641	Mutant	3	38	64127
READ	SCAF11	OS	0.57999	0.997659	1.09459e-07	WT	3	145	9169
READ	GSDMC	DSS	0.60815	0.997844	1.07924e-07	WT	3	133	56169
READ	NLRP7	OS	0.631224	0.634624	1.63411	Mutant	6	142	199713
READ	SCAF11	DSS	0.639263	0.998025	1.08447e-07	WT	4	132	9169
READ	NLRP7	PFS	0.731304	0.73246	0.706827	WT	6	142	199713
READ	NOD2	PFS	0.983204	0.983065	0.978708	WT	3	145	64127
SARC	NLRP1	PFS	0.24879	0.27263	0.332184	WT	3	236	22861
SARC	PLCG1	DFI	0.286595	0.286136	1.88384	Mutant	3	135	5335
SARC	TNF	PFS	0.40456	0.417316	0.442677	WT	3	236	7124
SARC	SCAF11	PFS	0.44384	0.454307	0.471674	WT	3	236	9169
SARC	PLCG1	DSS	0.529494	0.532732	0.637831	WT	5	218	5335
SARC	NLRP1	OS	0.687589	0.690984	0.67021	WT	3	236	22861
SARC	PLCG1	OS	0.691316	0.691732	0.791191	WT	6	233	5335
SARC	TNF	OS	0.705268	0.70839	0.686291	WT	3	236	7124
SARC	SCAF11	OS	0.783594	0.785896	0.760839	WT	3	236	9169
SARC	NLRP1	DSS	0.806517	0.808755	0.783503	WT	3	220	22861
SARC	TNF	DSS	0.817422	0.819611	0.794648	WT	3	220	7124
SARC	SCAF11	DSS	0.896554	0.898603	0.879509	WT	3	220	9169
SARC	PLCG1	PFS	0.921447	0.91585	1.04936	Mutant	6	233	5335
SKCM	IL6	DSS	5.62957e-10	4.56347e-06	16.0025	Mutant	3	424	3569
SKCM	IL6	OS	0.000610851	0.00195175	4.81085	Mutant	4	455	3569
SKCM	IL6	PFS	0.0443097	0.0531482	2.65303	Mutant	4	450	3569
SKCM	TIRAP	PFS	0.0587353	0.0920893	0.183643	WT	3	451	114609
SKCM	ELANE	OS	0.0621857	0.095735	0.187413	WT	7	452	1991
SKCM	CASP6	PFS	0.0647929	0.0986302	0.191085	WT	5	449	839
SKCM	ELANE	DSS	0.0779464	0.111816	0.202005	WT	7	420	1991
SKCM	CASP5	PFS	0.0853977	0.0896569	0.562841	WT	16	438	838
SKCM	ELANE	PFS	0.10135	0.114557	0.400115	WT	7	447	1991
SKCM	IL1B	DSS	0.110929	0.115432	1.7146	Mutant	13	414	3553
SKCM	CASP3	OS	0.126631	0.993533	1.09625e-07	WT	4	455	836
SKCM	NLRP1	PFS	0.128523	0.129398	0.777327	WT	61	393	22861
SKCM	CASP3	DSS	0.145316	0.993839	1.09442e-07	WT	4	423	836
SKCM	AIM2	PFS	0.162224	0.165679	1.59938	Mutant	11	443	9447
SKCM	IL1B	OS	0.190603	0.194432	1.55674	Mutant	13	446	3553
SKCM	NLRP6	PFS	0.192817	0.198775	0.554453	WT	8	446	171389
SKCM	GSDMC	PFS	0.222047	0.223401	1.28998	Mutant	33	421	56169
SKCM	TIRAP	OS	0.248546	0.272314	0.330975	WT	3	456	114609
SKCM	TIRAP	DSS	0.285394	0.306352	0.356507	WT	3	424	114609
SKCM	CASP8	PFS	0.293824	0.296783	0.687627	WT	12	442	841
SKCM	PJVK	DSS	0.301822	0.308838	0.552533	WT	10	417	494513
SKCM	NLRP3	PFS	0.306103	0.306623	0.840936	WT	60	394	114548
SKCM	CASP6	OS	0.30879	0.328027	0.374979	WT	5	454	839
SKCM	NLRP6	OS	0.313653	0.318585	0.600796	WT	8	451	171389
SKCM	IL18	OS	0.320543	0.327427	1.77202	Mutant	6	453	3606
SKCM	NOD1	PFS	0.341832	0.343397	0.736641	WT	17	437	10392
SKCM	NLRP1	DSS	0.344648	0.345236	0.813256	WT	56	371	22861
SKCM	CASP6	DSS	0.354573	0.370592	0.407227	WT	5	422	839
SKCM	IL1B	PFS	0.359385	0.360342	1.32465	Mutant	13	441	3553
SKCM	GSDMB	PFS	0.372853	0.37477	0.712131	WT	12	442	55876
SKCM	IL18	PFS	0.394126	0.397113	1.53273	Mutant	6	448	3606
SKCM	NLRP3	DSS	0.395542	0.396506	0.817894	WT	54	373	114548
SKCM	PJVK	OS	0.410172	0.413408	0.66139	WT	11	448	494513
SKCM	NLRP6	DSS	0.412584	0.415725	0.658957	WT	8	419	171389
SKCM	CASP1	DSS	0.415204	0.416139	1.36884	Mutant	12	415	834
SKCM	NLRP7	PFS	0.461868	0.462517	1.1357	Mutant	49	405	199713
SKCM	NLRC4	PFS	0.463344	0.462806	0.860336	WT	37	417	58484
SKCM	NLRP2	PFS	0.466545	0.467582	1.13447	Mutant	52	402	55655
SKCM	NLRP1	OS	0.4777	0.477814	0.872872	WT	63	396	22861
SKCM	GSDMB	OS	0.496328	0.497836	1.29821	Mutant	12	447	55876
SKCM	SCAF11	OS	0.502511	0.503502	0.772963	WT	15	444	9169
SKCM	IL18	DSS	0.506942	0.511098	1.5981	Mutant	5	422	3606
SKCM	GSDMC	DSS	0.509372	0.510048	1.20134	Mutant	30	397	56169
SKCM	GSDMD	DSS	0.528375	0.530365	1.37405	Mutant	7	420	79792
SKCM	NLRP3	OS	0.530846	0.531183	0.879036	WT	61	398	114548
SKCM	GSDMC	OS	0.552853	0.553406	1.16176	Mutant	33	426	56169
SKCM	PLCG1	PFS	0.564605	0.565339	0.866211	WT	21	433	5335
SKCM	CASP5	DSS	0.568435	0.56918	0.789401	WT	15	412	838
SKCM	CASP5	OS	0.572715	0.573285	0.805302	WT	16	443	838
SKCM	CASP1	OS	0.586714	0.586441	1.23285	Mutant	12	447	834
SKCM	GSDMA	PFS	0.58866	0.589977	1.17225	Mutant	16	438	284110
SKCM	NOD2	DSS	0.593342	0.59332	0.869473	WT	35	392	64127
SKCM	SCAF11	DSS	0.594999	0.59554	0.801887	WT	14	413	9169
SKCM	NLRC4	DSS	0.603386	0.603398	0.869109	WT	33	394	58484
SKCM	GSDMB	DSS	0.607137	0.608096	1.23774	Mutant	11	416	55876
SKCM	AIM2	DSS	0.609201	0.610176	1.23637	Mutant	11	416	9447
SKCM	PLCG1	DSS	0.644049	0.644705	1.15438	Mutant	18	409	5335
SKCM	GSDMD	OS	0.657267	0.658198	1.25059	Mutant	7	452	79792
SKCM	NOD1	OS	0.665465	0.665607	0.855426	WT	18	441	10392
SKCM	NLRP7	DSS	0.672855	0.672603	0.904639	WT	45	382	199713
SKCM	GSDMA	OS	0.70207	0.702097	0.870984	WT	18	441	284110
SKCM	GSDMA	DSS	0.709172	0.709355	0.844301	WT	15	412	284110
SKCM	NOD2	OS	0.716026	0.71571	0.916143	WT	37	422	64127
SKCM	PRKACA	DSS	0.720524	0.720708	0.834517	WT	9	418	5566
SKCM	NLRP2	OS	0.725772	0.725798	1.07637	Mutant	52	407	55655
SKCM	SCAF11	PFS	0.729396	0.729458	0.899116	WT	15	439	9169
SKCM	GSDMD	PFS	0.736109	0.736999	1.14862	Mutant	7	447	79792
SKCM	PLCG1	OS	0.74356	0.744052	1.09455	Mutant	21	438	5335
SKCM	AIM2	OS	0.761224	0.761682	1.13411	Mutant	11	448	9447
SKCM	GSDME	PFS	0.785305	0.785973	0.912149	WT	12	442	1687
SKCM	NLRC4	OS	0.786225	0.785889	0.935176	WT	36	423	58484
SKCM	CASP4	PFS	0.808798	0.809765	1.11475	Mutant	6	448	837
SKCM	GSDME	DSS	0.81809	0.817968	0.900784	WT	11	416	1687
SKCM	CASP3	PFS	0.835668	0.835282	0.88598	WT	4	450	836
SKCM	NOD1	DSS	0.853128	0.852963	0.930826	WT	17	410	10392
SKCM	CASP4	OS	0.861923	0.862818	0.884392	WT	6	453	837
SKCM	NOD2	PFS	0.86398	0.863223	0.965883	WT	37	417	64127
SKCM	PRKACA	OS	0.865744	0.866078	1.07241	Mutant	10	449	5566
SKCM	CASP8	OS	0.869089	0.869302	0.942345	WT	12	447	841
SKCM	CASP8	DSS	0.914071	0.914343	1.03974	Mutant	12	415	841
SKCM	PJVK	PFS	0.917063	0.917289	0.965449	WT	11	443	494513
SKCM	CASP1	PFS	0.923831	0.923261	0.967909	WT	12	442	834
SKCM	NLRP2	DSS	0.935003	0.934761	1.01964	Mutant	46	381	55655
SKCM	NLRP7	OS	0.96067	0.960144	0.989597	WT	50	409	199713
SKCM	GSDME	OS	0.962972	0.962723	0.980814	WT	12	447	1687
SKCM	PRKACA	PFS	0.988114	0.987303	0.99393	WT	9	445	5566
SKCM	CASP4	DSS	0.989426	0.99042	0.991491	WT	6	421	837
STAD	NLRP2	DFI	0.00231398	0.00522483	4.34893	Mutant	6	217	55655
STAD	PYCARD	OS	0.0392942	0.0701974	6.21606	Mutant	3	429	29108
STAD	NLRP3	PFS	0.0465963	0.0538556	0.417344	WT	19	416	114548
STAD	GSDMA	PFS	0.0601271	0.992077	1.08521e-07	WT	4	431	284110
STAD	SCAF11	OS	0.0626223	0.0806116	0.288282	WT	12	420	9169
STAD	CASP5	PFS	0.0755994	0.0881126	0.370741	WT	13	422	838
STAD	SCAF11	DSS	0.0887312	0.122886	0.211966	WT	11	353	9169
STAD	SCAF11	PFS	0.0963548	0.105741	0.44141	WT	13	422	9169
STAD	GSDMA	OS	0.102106	0.993097	1.08998e-07	WT	4	428	284110
STAD	NLRP1	OS	0.121629	0.139185	0.348901	WT	12	420	22861
STAD	NLRP1	DSS	0.137536	0.169653	0.251336	WT	12	352	22861
STAD	PYCARD	PFS	0.141471	0.171705	3.95439	Mutant	3	432	29108
STAD	CASP5	DSS	0.163823	0.194212	0.2711	WT	11	353	838
STAD	NLRP3	OS	0.174887	0.181408	0.544667	WT	19	413	114548
STAD	GSDMA	DSS	0.181254	0.994361	1.08692e-07	WT	4	360	284110
STAD	CASP5	OS	0.189869	0.200268	0.473923	WT	13	419	838
STAD	ELANE	PFS	0.193567	0.221642	0.293403	WT	6	429	1991
STAD	PLCG1	OS	0.193733	0.198612	0.60846	WT	22	410	5335
STAD	PLCG1	PFS	0.201194	0.204756	0.648705	WT	22	413	5335
STAD	NOD2	DFI	0.206167	0.996606	3.88916e-08	WT	7	216	64127
STAD	NLRC4	DFI	0.222436	0.99672	3.90112e-08	WT	6	217	58484
STAD	CASP5	DFI	0.241494	0.996842	3.92904e-08	WT	8	215	838
STAD	GSDME	PFS	0.247481	0.260026	0.448831	WT	6	429	1687
STAD	NLRP3	DFI	0.268644	0.291237	0.343369	WT	12	211	114548
STAD	NLRP3	DSS	0.270473	0.278439	0.529343	WT	17	347	114548
STAD	NLRP1	PFS	0.272098	0.277912	0.577915	WT	14	421	22861
STAD	CASP8	OS	0.307487	0.309311	1.41741	Mutant	21	411	841
STAD	CASP9	PFS	0.312269	0.331237	0.377378	WT	4	431	842
STAD	NLRP7	PFS	0.313134	0.317252	0.635708	WT	15	420	199713
STAD	PRKACA	PFS	0.3186	0.328194	0.499058	WT	6	429	5566
STAD	NOD2	PFS	0.32087	0.325192	0.640368	WT	16	419	64127
STAD	ELANE	OS	0.337514	0.354686	0.394549	WT	6	426	1991
STAD	NOD2	DSS	0.337823	0.346816	0.510293	WT	14	350	64127
STAD	ELANE	DFI	0.346914	0.996048	1.07708e-07	WT	4	219	1991
STAD	NLRC4	PFS	0.356885	0.36042	0.660691	WT	13	422	58484
STAD	IL1B	PFS	0.357714	0.374067	0.410145	WT	4	431	3553
STAD	GSDMA	DFI	0.371299	0.996227	1.08836e-07	WT	3	220	284110
STAD	NOD2	OS	0.3739	0.378231	0.639923	WT	16	416	64127
STAD	PLCG1	DSS	0.402604	0.405564	0.682414	WT	20	344	5335
STAD	GSDME	DFI	0.417296	0.996564	1.09761e-07	WT	3	220	1687
STAD	NLRP6	DFI	0.422946	0.996608	1.09599e-07	WT	4	219	171389
STAD	NLRP2	DSS	0.425049	0.4367	0.457368	WT	10	354	55655
STAD	GSDME	DSS	0.451758	0.461921	0.476956	WT	5	359	1687
STAD	CASP9	OS	0.461539	0.471582	0.48561	WT	4	428	842
STAD	NLRP6	PFS	0.469045	0.474338	0.601405	WT	8	427	171389
STAD	PJVK	PFS	0.474653	0.483568	0.495309	WT	3	432	494513
STAD	GSDME	OS	0.476303	0.481153	0.605296	WT	6	426	1687
STAD	AIM2	DSS	0.488712	0.489881	1.63871	Mutant	4	360	9447
STAD	IL1B	OS	0.496782	0.504644	0.512037	WT	4	428	3553
STAD	NLRP7	DSS	0.503852	0.50767	0.622747	WT	12	352	199713
STAD	NOD1	DSS	0.519747	0.526668	0.52914	WT	9	355	10392
STAD	GSDMC	DFI	0.545133	0.551122	0.54684	WT	7	216	56169
STAD	PLCG1	DFI	0.546724	0.550489	0.648814	WT	13	210	5335
STAD	PRKACA	OS	0.554558	0.559416	0.660074	WT	6	426	5566
STAD	PRKACA	DSS	0.555895	0.563255	0.559199	WT	5	359	5566
STAD	NLRP2	PFS	0.561525	0.562966	1.23226	Mutant	14	421	55655
STAD	NLRP7	DFI	0.593473	0.597751	0.586159	WT	9	214	199713
STAD	AIM2	OS	0.597232	0.595516	1.36276	Mutant	5	427	9447
STAD	NOD1	OS	0.597625	0.599501	0.6882	WT	10	422	10392
STAD	SCAF11	DFI	0.597864	0.602007	0.589816	WT	7	216	9169
STAD	CASP4	PFS	0.601734	0.602756	0.738679	WT	8	427	837
STAD	ELANE	DSS	0.630414	0.633601	0.618636	WT	6	358	1991
STAD	NLRP6	OS	0.630461	0.631855	0.711043	WT	8	424	171389
STAD	PJVK	OS	0.657515	0.660666	0.643689	WT	3	429	494513
STAD	NOD1	PFS	0.65856	0.659013	0.773555	WT	10	425	10392
STAD	GSDMC	PFS	0.663874	0.663508	0.845825	WT	14	421	56169
STAD	CASP8	DSS	0.686946	0.687973	0.790075	WT	15	349	841
STAD	NLRC4	OS	0.692222	0.692805	0.83561	WT	13	419	58484
STAD	NLRC4	DSS	0.692491	0.692882	0.793045	WT	11	353	58484
STAD	NLRP7	OS	0.700996	0.701652	0.840208	WT	14	418	199713
STAD	GSDMC	OS	0.72651	0.727107	1.14441	Mutant	14	418	56169
STAD	GSDMB	PFS	0.72809	0.728214	1.28024	Mutant	4	431	55876
STAD	CASP9	DSS	0.75444	0.756238	0.731863	WT	4	360	842
STAD	IL1B	DSS	0.782397	0.782928	0.758042	WT	4	360	3553
STAD	CASP4	DFI	0.785232	0.786085	1.31639	Mutant	5	218	837
STAD	GSDMB	OS	0.832707	0.833752	0.810113	WT	4	428	55876
STAD	GSDMC	DSS	0.85477	0.854523	0.897982	WT	10	354	56169
STAD	CASP8	DFI	0.865339	0.865718	1.13041	Mutant	10	213	841
STAD	AIM2	PFS	0.876373	0.877079	1.0942	Mutant	5	430	9447
STAD	CASP4	DSS	0.877875	0.878205	1.11583	Mutant	7	357	837
STAD	CASP9	DFI	0.882244	0.882544	1.16147	Mutant	4	219	842
STAD	CASP4	OS	0.884286	0.883866	0.918363	WT	8	424	837
STAD	CASP8	PFS	0.889759	0.89	1.04829	Mutant	21	414	841
STAD	NOD1	DFI	0.904174	0.904438	1.1293	Mutant	5	218	10392
STAD	PRKACA	DFI	0.919698	0.919594	0.902783	WT	4	219	5566
STAD	NLRP6	DSS	0.9272	0.927526	1.0672	Mutant	8	356	171389
STAD	NLRP1	DFI	0.932703	0.932947	1.06281	Mutant	8	215	22861
STAD	NLRP2	OS	0.953829	0.954601	0.974453	WT	14	418	55655
THCA	NLRC4	PFS	0.492649	0.995487	3.01448e-07	WT	3	497	58484
THCA	NLRC4	DFI	0.614632	0.996691	3.00953e-07	WT	3	349	58484
THCA	NLRC4	OS	0.725424	0.997694	3.00143e-07	WT	3	493	58484
THCA	NLRC4	DSS	0.847496	0.998734	3.02123e-07	WT	3	488	58484
THYM	NOD1	DSS	3.259e-05	0.010973	36.4966	Mutant	3	114	10392
THYM	NOD1	PFS	0.0146221	0.0284471	5.10947	Mutant	3	119	10392
THYM	NOD1	OS	0.0254674	0.0597756	7.86557	Mutant	3	119	10392
UCEC	SCAF11	PFS	0.000533648	0.00230546	0.168492	WT	46	484	9169
UCEC	NLRP3	PFS	0.00121121	0.00268646	0.253612	WT	49	481	114548
UCEC	CASP5	PFS	0.00164623	0.00670481	0.144439	WT	33	497	838
UCEC	SCAF11	OS	0.00335484	0.0188183	0.0940135	WT	46	484	9169
UCEC	CASP8	PFS	0.00379648	0.00571723	0.340668	WT	53	477	841
UCEC	NOD1	PFS	0.00390523	0.00865	0.214815	WT	33	497	10392
UCEC	NLRP3	OS	0.00475245	0.012911	0.168139	WT	49	481	114548
UCEC	NLRP7	PFS	0.00622128	0.0106489	0.273469	WT	39	491	199713
UCEC	NLRC4	PFS	0.00730122	0.0104088	0.341484	WT	45	485	58484
UCEC	NLRC4	OS	0.00782709	0.0178238	0.182667	WT	45	485	58484
UCEC	NLRC4	DSS	0.00856136	0.995719	1.25533e-08	WT	43	458	58484
UCEC	NOD2	PFS	0.0123848	0.0182023	0.299325	WT	33	497	64127
UCEC	CASP5	OS	0.0125715	0.0364915	0.121558	WT	33	497	838
UCEC	CASP8	OS	0.0210081	0.0283132	0.323651	WT	53	477	841
UCEC	SCAF11	DSS	0.0234491	0.0522479	0.14101	WT	46	455	9169
UCEC	CASP5	DSS	0.0249727	0.994185	3.59267e-08	WT	32	469	838
UCEC	AIM2	PFS	0.0254822	0.0405516	0.232096	WT	21	509	9447
UCEC	NOD1	DFI	0.0269251	0.996317	1.32218e-08	WT	25	366	10392
UCEC	CASP4	PFS	0.0277402	0.0431987	0.236721	WT	19	511	837
UCEC	NOD2	OS	0.0287142	0.0441501	0.235013	WT	33	497	64127
UCEC	GSDMA	PFS	0.0318558	0.047821	0.243469	WT	19	511	284110
UCEC	CASP1	PFS	0.0333528	0.0443723	0.30935	WT	31	499	834
UCEC	GSDMC	OS	0.0377551	0.0695516	0.161119	WT	29	501	56169
UCEC	NLRP6	PFS	0.0397026	0.071544	0.163449	WT	13	517	171389
UCEC	NLRP3	DSS	0.0427439	0.0600986	0.258007	WT	49	452	114548
UCEC	NLRP2	PFS	0.0433003	0.050483	0.410006	WT	33	497	55655
UCEC	GSDMC	PFS	0.0441043	0.0530303	0.374754	WT	29	501	56169
UCEC	PLCG1	DFI	0.050392	0.994863	3.69555e-08	WT	21	370	5335
UCEC	NLRP6	OS	0.0505592	0.994818	3.76777e-08	WT	13	517	171389
UCEC	TIRAP	PFS	0.0532392	0.991897	1.07142e-07	WT	10	520	114609
UCEC	NLRP7	DFI	0.0550105	0.0887938	0.179468	WT	31	360	199713
UCEC	CASP1	OS	0.0575224	0.0912548	0.182922	WT	31	499	834
UCEC	NLRP7	OS	0.0642934	0.0768111	0.353131	WT	39	491	199713
UCEC	NOD1	DSS	0.066897	0.100992	0.190636	WT	31	470	10392
UCEC	AIM2	OS	0.0691109	0.103222	0.193826	WT	21	509	9447
UCEC	AIM2	DSS	0.070088	0.995205	3.76525e-08	WT	20	481	9447
UCEC	CASP4	OS	0.070706	0.104895	0.195539	WT	19	511	837
UCEC	PLCG1	PFS	0.0721832	0.0816593	0.412539	WT	27	503	5335
UCEC	CASP4	DSS	0.072287	0.995233	3.7835e-08	WT	18	483	837
UCEC	NOD2	DSS	0.0732125	0.107409	0.196498	WT	32	469	64127
UCEC	NOD1	OS	0.0739922	0.0864505	0.363048	WT	33	497	10392
UCEC	GSDMA	OS	0.0749145	0.10911	0.199067	WT	19	511	284110
UCEC	SCAF11	DFI	0.0775612	0.0961664	0.301439	WT	38	353	9169
UCEC	GSDMA	DSS	0.0856092	0.995431	3.80131e-08	WT	18	483	284110
UCEC	CASP9	PFS	0.0913138	0.109349	0.318156	WT	14	516	842
UCEC	NLRP2	DSS	0.093264	0.127531	0.214851	WT	31	470	55655
UCEC	CASP5	DFI	0.0933635	0.127663	0.214884	WT	26	365	838
UCEC	CASP8	DSS	0.0987601	0.111499	0.388632	WT	52	449	841
UCEC	GSDMB	PFS	0.10809	0.141609	0.228438	WT	9	521	55876
UCEC	GSDMC	DSS	0.112719	0.146337	0.230949	WT	29	472	56169
UCEC	GSDMD	PFS	0.117977	0.151069	0.236617	WT	12	518	79792
UCEC	NLRP6	DSS	0.118587	0.995833	3.83798e-08	WT	13	488	171389
UCEC	GSDMD	OS	0.119037	0.993463	1.07248e-07	WT	12	518	79792
UCEC	CASP8	DFI	0.125906	0.138285	0.414539	WT	43	348	841
UCEC	NLRP2	DFI	0.126353	0.159326	0.241476	WT	22	369	55655
UCEC	NLRP2	OS	0.12882	0.140887	0.420496	WT	33	497	55655
UCEC	IL18	PFS	0.1303	0.162544	0.244766	WT	8	522	3606
UCEC	NLRP1	PFS	0.133571	0.136932	0.625736	WT	51	479	22861
UCEC	GSDME	PFS	0.135638	0.141219	0.563197	WT	30	500	1687
UCEC	CASP9	DSS	0.137517	0.996026	3.8559e-08	WT	13	488	842
UCEC	CASP9	OS	0.138212	0.170154	0.250353	WT	14	516	842
UCEC	NLRP7	DSS	0.141871	0.15916	0.362909	WT	38	463	199713
UCEC	TIRAP	OS	0.144701	0.993884	1.07208e-07	WT	10	520	114609
UCEC	CASP3	PFS	0.14811	0.16484	0.371694	WT	15	515	836
UCEC	CASP1	DSS	0.154649	0.185862	0.263284	WT	31	470	834
UCEC	PRKACA	DSS	0.156888	0.996189	3.91421e-08	WT	14	487	5566
UCEC	PJVK	PFS	0.164559	0.172867	0.498989	WT	20	510	494513
UCEC	GSDMD	DSS	0.185316	0.994452	1.06983e-07	WT	12	489	79792
UCEC	GSDMB	DSS	0.186457	0.994476	1.06538e-07	WT	8	493	55876
UCEC	IL1B	PFS	0.186482	0.215144	0.288222	WT	12	518	3553
UCEC	ELANE	DFI	0.190948	0.20642	2.48578	Mutant	6	385	1991
UCEC	TIRAP	DFI	0.192855	0.996485	3.93744e-08	WT	10	381	114609
UCEC	PJVK	OS	0.192921	0.20795	0.404669	WT	20	510	494513
UCEC	NOD2	DFI	0.203714	0.218546	0.412046	WT	29	362	64127
UCEC	CASP6	PFS	0.207347	0.221699	0.41864	WT	12	518	839
UCEC	NLRP1	DFI	0.210841	0.220883	0.483186	WT	35	356	22861
UCEC	AIM2	DFI	0.222731	0.248863	0.312131	WT	18	373	9447
UCEC	PLCG1	OS	0.22831	0.237617	0.498691	WT	27	503	5335
UCEC	GSDMB	DFI	0.23053	0.994971	1.07271e-07	WT	6	385	55876
UCEC	CASP3	OS	0.23199	0.257239	0.319796	WT	15	515	836
UCEC	TIRAP	DSS	0.23919	0.995051	1.07901e-07	WT	10	491	114609
UCEC	PRKACA	PFS	0.241938	0.254791	0.444379	WT	15	515	5566
UCEC	ELANE	OS	0.244771	0.995111	1.07765e-07	WT	6	524	1991
UCEC	GSDMC	DFI	0.25701	0.269515	0.451268	WT	25	366	56169
UCEC	NLRP3	DFI	0.261822	0.268345	0.562496	WT	42	349	114548
UCEC	CASP4	DFI	0.265675	0.28843	0.3424	WT	15	376	837
UCEC	PJVK	DSS	0.273491	0.2956	0.347762	WT	19	482	494513
UCEC	CASP6	OS	0.284156	0.305365	0.356449	WT	12	518	839
UCEC	IL1B	DSS	0.285449	0.99549	1.08947e-07	WT	11	490	3553
UCEC	PRKACA	OS	0.289669	0.310456	0.360387	WT	15	515	5566
UCEC	IL18	DFI	0.29132	0.995549	1.08689e-07	WT	5	386	3606
UCEC	PYCARD	PFS	0.302174	0.993212	3.01615e-07	WT	3	527	29108
UCEC	GSDMB	OS	0.30575	0.325339	0.371357	WT	9	521	55876
UCEC	IL1B	DFI	0.306997	0.995687	1.08958e-07	WT	9	382	3553
UCEC	IL18	OS	0.320179	0.338622	0.379733	WT	8	522	3606
UCEC	GPX4	OS	0.328812	0.995853	1.10393e-07	WT	6	524	2879
UCEC	GSDME	DFI	0.328847	0.338371	0.501498	WT	21	370	1687
UCEC	TNF	PFS	0.329243	0.347021	0.388532	WT	7	523	7124
UCEC	PLCG1	DSS	0.332964	0.342304	0.504341	WT	26	475	5335
UCEC	GSDMA	DFI	0.342403	0.359448	0.39638	WT	15	376	284110
UCEC	GSDME	OS	0.34392	0.348217	0.647021	WT	30	500	1687
UCEC	TNF	DFI	0.351916	0.996059	1.09595e-07	WT	5	386	7124
UCEC	CASP1	DFI	0.356802	0.365259	0.520839	WT	26	365	834
UCEC	ELANE	DSS	0.363508	0.996158	1.09255e-07	WT	6	495	1991
UCEC	NLRP1	DSS	0.385509	0.389377	0.639741	WT	46	455	22861
UCEC	GPX4	DSS	0.402571	0.996447	1.10297e-07	WT	6	495	2879
UCEC	NLRC4	DFI	0.412725	0.416137	0.655495	WT	39	352	58484
UCEC	PYCARD	OS	0.444048	0.99496	3.02233e-07	WT	3	527	29108
UCEC	GPX4	DFI	0.453284	0.463562	2.09745	Mutant	4	387	2879
UCEC	CASP3	DSS	0.455366	0.465438	0.478774	WT	15	486	836
UCEC	CASP9	DFI	0.459434	0.469306	0.481627	WT	12	379	842
UCEC	CASP6	DSS	0.478788	0.487675	0.496335	WT	12	489	839
UCEC	NLRP6	DFI	0.496536	0.504587	0.509848	WT	10	381	171389
UCEC	CASP3	DFI	0.50052	0.508387	0.512967	WT	12	379	836
UCEC	PRKACA	DFI	0.513852	0.521125	0.523293	WT	12	379	5566
UCEC	PYCARD	DSS	0.517231	0.995737	3.02084e-07	WT	3	498	29108
UCEC	IL6	OS	0.518077	0.525128	0.527099	WT	10	520	3569
UCEC	IL6	PFS	0.532339	0.535525	0.642692	WT	10	520	3569
UCEC	CASP6	DFI	0.533393	0.539855	0.538494	WT	9	382	839
UCEC	IL1B	OS	0.571501	0.576503	0.570068	WT	12	518	3553
UCEC	GPX4	PFS	0.618435	0.621903	0.609534	WT	6	524	2879
UCEC	TNF	OS	0.630892	0.634118	0.618714	WT	7	523	7124
UCEC	IL18	DSS	0.668076	0.670424	0.649788	WT	8	493	3606
UCEC	PJVK	DFI	0.705139	0.705954	0.761951	WT	16	375	494513
UCEC	NLRP1	OS	0.721006	0.721041	0.881329	WT	51	479	22861
UCEC	GSDMD	DFI	0.761101	0.761972	0.736507	WT	9	382	79792
UCEC	GSDME	DSS	0.766112	0.767654	0.857672	WT	29	472	1687
UCEC	IL6	DSS	0.840712	0.840928	0.816547	WT	10	491	3569
UCEC	IL6	DFI	0.97392	0.973876	0.967486	WT	8	383	3569
UCEC	ELANE	PFS	0.985019	0.984771	0.986428	WT	6	524	1991
UCEC	TNF	DSS	0.992686	0.992634	0.990714	WT	7	494	7124

## Sheet: Table S4
Table S4 Methylation differences for pyroptosis genes in cancers
Cancertype	symbol	Gene_tag	FC	Trend	P-value	FDR	Entrez
BLCA	PJVK	cg03724445_DFNB59	-0.0088866	Down	0.0224003	0.0232646	494513
BLCA	IL1B	cg01290568_IL1B	-0.0454023	Down	0.0070198	0.00804195	3553
BLCA	PRKACA	cg20110535_PRKACA	-0.0198873	Down	0.005548	0.00646743	5566
BLCA	CASP3	cg07234880_CASP3	0.00283313	Up	0.00140856	0.00179541	836
BLCA	PYCARD	cg05214748_PYCARD	0.0481254	Up	0.000883566	0.00116285	29108
BLCA	NLRC4	cg22713339_NLRC4	-0.0153019	Down	0.000527639	0.000717221	58484
BLCA	GSDMD	cg23101464_GSDMD	0.039272	Up	0.000162371	0.000236128	79792
BLCA	ELANE	cg08269974_ELANE	0.198793	Up	4.43327e-07	9.08781e-07	1991
BLCA	PLCG1	cg06457011_PLCG1	0.214886	Up	2.01749e-07	4.34043e-07	5335
BLCA	NLRP7	cg14928510_NLRP7	-0.262147	Down	5.64029e-08	1.32119e-07	199713
BLCA	GSDMA	cg26162295_GSDMA	-0.15687	Down	4.92086e-08	1.16316e-07	284110
BLCA	NOD2	cg06181567_NOD2	-0.120779	Down	2.75606e-08	6.72884e-08	64127
BLCA	GSDME	cg24805239_DFNA5	0.0635379	Up	1.27865e-08	3.25894e-08	1687
BLCA	AIM2	cg00490406_AIM2	-0.357576	Down	7.16971e-09	1.889e-08	9447
BLCA	GSDMB	cg16822095_GSDMB	-0.200774	Down	2.09999e-09	5.96836e-09	55876
BLCA	GSDMC	cg05316065_GSDMC	-0.227131	Down	1.71833e-11	6.63302e-11	56169
BLCA	CASP8	cg26799474_CASP8	-0.454574	Down	1.64751e-12	7.4218e-12	841
BLCA	NLRP6	cg11717054_NLRP6	0.306454	Up	5.03276e-13	2.42722e-12	171389
BLCA	IL18	cg09122223_IL18	-0.299182	Down	3.03253e-20	4.0102e-19	3606
BRCA	GPX4	cg18061485_GPX4	-0.00857877	Down	0.00685184	0.00750121	2879
BRCA	CASP4	cg08469834_CASP4	0.0168927	Up	0.000639267	0.000765957	837
BRCA	NLRP6	cg02925222_NLRP6	0.021535	Up	0.000131723	0.000166017	171389
BRCA	PJVK	cg23246789_DFNB59	0.00489095	Up	8.6405e-05	0.000110343	494513
BRCA	GSDMA	cg08995595_GSDMA	-0.0141896	Down	2.0797e-05	2.7646e-05	284110
BRCA	CASP5	cg10825847_CASP5	-0.0339083	Down	1.5957e-05	2.1372e-05	838
BRCA	TIRAP	cg09036154_TIRAP	0.00205897	Up	1.21499e-09	2.02794e-09	114609
BRCA	GSDMD	cg10074813_GSDMD	-0.0249749	Down	3.7255e-10	6.36719e-10	79792
BRCA	CASP1	cg21002651_CASP1	0.0662094	Up	8.75567e-11	1.53569e-10	834
BRCA	IL6	cg13104385_IL6	-0.0824221	Down	7.36979e-11	1.29643e-10	3569
BRCA	NLRP3	cg03505654_NLRP3	-0.11871	Down	3.95713e-11	7.03878e-11	114548
BRCA	NLRC4	cg21028608_NLRC4	-0.0274152	Down	1.23456e-11	2.24645e-11	58484
BRCA	CASP3	cg20176042_CASP3	-0.0317211	Down	7.65903e-13	1.46385e-12	836
BRCA	GSDMB	cg13212159_GSDMB	-0.0364433	Down	1.52161e-14	3.08237e-14	55876
BRCA	PYCARD	cg09055507_PYCARD	-0.086948	Down	2.47757e-20	6.12907e-20	29108
BRCA	GSDMC	cg26073844_GSDMC	-0.129825	Down	2.15706e-20	5.34293e-20	56169
BRCA	ELANE	cg08269974_ELANE	0.190914	Up	2.21875e-28	7.05402e-28	1991
BRCA	NOD2	cg16771652_NOD2	-0.117905	Down	6.08795e-31	2.08044e-30	64127
BRCA	NLRP1	cg22642477_NLRP1	0.0957006	Up	1.37627e-31	4.80748e-31	22861
BRCA	TNF	cg01360627_TNF	-0.0930879	Down	3.39784e-33	1.247e-32	7124
BRCA	IL18	cg26534425_IL18	-0.209284	Down	8.09128e-35	3.09034e-34	3606
BRCA	NOD1	cg09579281_NOD1	0.182659	Up	2.88743e-38	1.21455e-37	10392
BRCA	PRKACA	cg26670249_PRKACA	0.136523	Up	1.29827e-42	6.13957e-42	5566
BRCA	CASP8	cg26799474_CASP8	-0.182805	Down	2.78188e-43	1.34861e-42	841
BRCA	PLCG1	cg06457011_PLCG1	0.274358	Up	3.78263e-46	1.98628e-45	5335
BRCA	GSDME	cg04770504_DFNA5	0.156436	Up	1.01134e-81	1.70423e-80	1687
BRCA	NLRP7	cg14928510_NLRP7	-0.28383	Down	1.09388e-84	2.03064e-83	199713
BRCA	AIM2	cg00490406_AIM2	-0.322665	Down	4.76362e-111	2.51006e-109	9447
COAD	IL1B	cg15836722_IL1B	-0.0266771	Down	0.0152407	0.0160797	3553
COAD	CASP9	cg25154447_CASP9	0.00525681	Up	0.00668934	0.00746646	842
COAD	PJVK	cg09890200_DFNB59	0.00530216	Up	0.00456238	0.0052286	494513
COAD	CASP8	cg23882545_CASP8	0.00758723	Up	0.00338373	0.00394768	841
COAD	CASP6	cg03797115_CASP6	-0.0394412	Down	0.00300296	0.00352719	839
COAD	NLRP2	cg24040502_NLRP2	0.083865	Up	0.00167788	0.00204033	55655
COAD	CASP5	cg10825847_CASP5	-0.0489985	Down	0.00107506	0.00134055	838
COAD	CASP1	cg21002651_CASP1	0.0176396	Up	0.000216945	0.000293973	834
COAD	IL18	cg09122223_IL18	-0.0909746	Down	5.4031e-05	7.837e-05	3606
COAD	TNF	cg09637172_TNF	0.0506109	Up	2.028e-05	3.0715e-05	7124
COAD	PLCG1	cg07893801_PLCG1	0.0727905	Up	3.46869e-06	5.63775e-06	5335
COAD	PYCARD	cg05907835_PYCARD	0.0450818	Up	3.37776e-06	5.49392e-06	29108
COAD	NLRC4	cg22805603_NLRC4	-0.0538608	Down	5.61072e-07	9.76569e-07	58484
COAD	GSDME	cg20764575_DFNA5	0.039309	Up	4.37815e-07	7.70363e-07	1687
COAD	CASP4	cg15665081_CASP4	-0.0311437	Down	3.72971e-07	6.60702e-07	837
COAD	AIM2	cg11003133_AIM2	-0.0789257	Down	6.76187e-08	1.27201e-07	9447
COAD	NLRP7	cg01879460_NLRP7	-0.0570214	Down	1.69291e-10	3.86059e-10	199713
COAD	NLRP1	cg09205190_NLRP1	-0.107203	Down	2.79096e-14	8.04041e-14	22861
COAD	ELANE	cg08269974_ELANE	0.191817	Up	9.9448e-17	3.31004e-16	1991
COAD	IL6	cg00087425_IL6	-0.194744	Down	7.08308e-22	3.09524e-21	3569
COAD	GSDMB	cg10057218_GSDMB	-0.259191	Down	2.60503e-38	2.64492e-37	55876
COAD	GSDMC	cg26073844_GSDMC	-0.323216	Down	3.06124e-42	3.79958e-41	56169
COAD	NLRP6	cg11717054_NLRP6	0.278521	Up	3.37159e-48	5.59614e-47	171389
COAD	NOD2	cg06181567_NOD2	-0.3243	Down	6.31721e-92	9.88819e-90	64127
ESCA	CASP9	cg21449655_CASP9	0.00409545	Up	0.0108512	0.0124039	842
ESCA	CASP6	cg05855157_CASP6	-0.0282626	Down	0.00844998	0.0101716	839
ESCA	CASP1	cg13802966_CASP1	-0.065952	Down	0.00372332	0.00536214	834
ESCA	GSDMC	cg05316065_GSDMC	-0.116384	Down	0.00218452	0.00353057	56169
ESCA	NLRP1	cg26561413_NLRP1	-0.219413	Down	0.001603	0.00277787	22861
ESCA	NLRP3	cg07313373_NLRP3	-0.146228	Down	0.00148247	0.00261533	114548
ESCA	PRKACA	cg08499107_PRKACA	0.00305547	Up	0.00105769	0.0020115	5566
ESCA	AIM2	cg00490406_AIM2	-0.241721	Down	0.000705709	0.00147261	9447
ESCA	PYCARD	cg05907835_PYCARD	-0.164231	Down	0.000436043	0.00102308	29108
ESCA	IL1B	cg07935264_IL1B	-0.340867	Down	1.3175e-05	6.9403e-05	3553
HNSC	CASP1	cg21002651_CASP1	-0.0478958	Down	0.00812217	0.00901809	834
HNSC	PRKACA	cg19302295_PRKACA	0.0011113	Up	0.00408028	0.00472233	5566
HNSC	NOD1	cg26956245_NOD1	-0.0446139	Down	0.00272941	0.00322832	10392
HNSC	PJVK	cg06333167_DFNB59	-0.00660506	Down	0.000918684	0.00115749	494513
HNSC	CASP3	cg07234880_CASP3	0.00207651	Up	0.000729462	0.000930286	836
HNSC	TIRAP	cg10291648_TIRAP	0.00146174	Up	1.758e-05	2.6804e-05	114609
HNSC	CASP9	cg02612026_CASP9	0.00572044	Up	1.6915e-05	2.5836e-05	842
HNSC	PYCARD	cg05214748_PYCARD	-0.065097	Down	1.1125e-05	1.7251e-05	29108
HNSC	GSDMC	cg26073844_GSDMC	-0.107552	Down	9.97179e-06	1.5551e-05	56169
HNSC	GPX4	cg01613691_GPX4	0.0477779	Up	9.3441e-06	1.4613e-05	2879
HNSC	TNF	cg17741993_TNF	-0.098517	Down	2.06401e-06	3.45947e-06	7124
HNSC	CASP5	cg10825847_CASP5	-0.0728539	Down	2.5466e-11	6.18804e-11	838
HNSC	NLRC4	cg21028608_NLRC4	-0.0208506	Down	1.87581e-11	4.59453e-11	58484
HNSC	CASP8	cg05130485_CASP8	-0.224539	Down	6.68695e-12	1.67519e-11	841
HNSC	IL6	cg02335517_IL6	-0.0338518	Down	5.39502e-12	1.35815e-11	3569
HNSC	NOD2	cg16771652_NOD2	-0.106465	Down	8.19172e-14	2.29833e-13	64127
HNSC	ELANE	cg08269974_ELANE	0.139129	Up	6.84537e-14	1.93323e-13	1991
HNSC	GSDMD	cg06043315_GSDMD	-0.106033	Down	5.341e-14	1.51704e-13	79792
HNSC	IL1B	cg15836722_IL1B	-0.144891	Down	1.5441e-18	5.589e-18	3553
HNSC	CASP6	cg03797115_CASP6	0.174497	Up	2.03231e-19	7.69159e-19	839
HNSC	NLRP3	cg03505654_NLRP3	-0.306194	Down	8.73486e-22	3.70109e-21	114548
HNSC	GSDMB	cg16822095_GSDMB	-0.157236	Down	3.28395e-28	1.9098e-27	55876
HNSC	NLRP7	cg14928510_NLRP7	-0.380409	Down	8.18116e-32	5.7197e-31	199713
HNSC	AIM2	cg00490406_AIM2	-0.424961	Down	1.19735e-32	8.69228e-32	9447
HNSC	NLRP6	cg10330545_NLRP6	0.174969	Up	1.79818e-37	1.61422e-36	171389
HNSC	GSDME	cg17569154_DFNA5	-0.202054	Down	7.21127e-73	3.80188e-71	1687
KIRC	NLRP2	cg24040502_NLRP2	0.0311636	Up	0.0131626	0.0137148	55655
KIRC	PJVK	cg03724445_DFNB59	0.00414362	Up	0.00174523	0.00193317	494513
KIRC	CASP3	cg13339708_CASP3	-0.00373143	Down	6.7114e-05	8.1218e-05	836
KIRC	CASP9	cg02612026_CASP9	0.00355462	Up	1.15491e-06	1.53098e-06	842
KIRC	CASP6	cg05295810_CASP6	0.00533208	Up	3.52301e-07	4.79716e-07	839
KIRC	TIRAP	cg02973469_TIRAP	0.0106503	Up	1.08039e-09	1.66015e-09	114609
KIRC	GSDMB	cg16822095_GSDMB	-0.029677	Down	6.74411e-11	1.09219e-10	55876
KIRC	IL6	cg02335517_IL6	-0.0322916	Down	6.51015e-12	1.10558e-11	3569
KIRC	ELANE	cg07239938_ELANE	-0.0790507	Down	4.32586e-17	9.18617e-17	1991
KIRC	NLRP6	cg03009397_NLRP6	-0.0753096	Down	3.45232e-18	7.69891e-18	171389
KIRC	TNF	cg09637172_TNF	-0.0483216	Down	4.57394e-19	1.05459e-18	7124
KIRC	CASP8	cg04286206_CASP8	-0.070931	Down	2.13701e-22	5.62498e-22	841
KIRC	PLCG1	cg06457011_PLCG1	0.158062	Up	4.07659e-23	1.09934e-22	5335
KIRC	IL1B	cg01290568_IL1B	-0.0534848	Down	9.04544e-24	2.49731e-23	3553
KIRC	GSDME	cg17569154_DFNA5	-0.074616	Down	9.94004e-25	2.83694e-24	1687
KIRC	GSDMC	cg23990303_GSDMC	-0.078006	Down	2.29176e-30	7.94351e-30	56169
KIRC	PYCARD	cg05214748_PYCARD	-0.103897	Down	6.5596e-32	2.39748e-31	29108
KIRC	AIM2	cg00490406_AIM2	-0.148205	Down	6.8483e-40	3.33456e-39	9447
KIRC	NLRP3	cg21991396_NLRP3	-0.0819716	Down	3.42253e-40	1.68443e-39	114548
KIRC	PRKACA	cg19621460_PRKACA	-0.172118	Down	8.7767e-41	4.43443e-40	5566
KIRC	NOD2	cg04172533_NOD2	-0.0924074	Down	4.78849e-41	2.44387e-40	64127
KIRC	CASP5	cg10825847_CASP5	-0.130592	Down	3.33589e-55	2.92882e-54	838
KIRC	NLRP7	cg14928510_NLRP7	-0.179666	Down	3.13796e-58	3.1309e-57	199713
KIRC	CASP1	cg21002651_CASP1	-0.225745	Down	2.90657e-60	3.16093e-59	834
KIRC	GSDMA	cg24910161_GSDMA	-0.137188	Down	5.81122e-64	7.28369e-63	284110
KIRC	GSDMD	cg10675725_GSDMD	-0.0600535	Down	2.74921e-68	4.07837e-67	79792
KIRC	IL18	cg26534425_IL18	-0.25324	Down	1.85005e-68	2.76411e-67	3606
KIRC	GPX4	cg14894245_GPX4	-0.183612	Down	2.75537e-82	7.05829e-81	2879
KIRC	NOD1	cg09579281_NOD1	-0.341511	Down	2.23879e-119	2.49975e-117	10392
KIRP	IL6	cg13104385_IL6	-0.0298144	Down	0.00969076	0.010551	3569
KIRP	CASP9	cg12138346_CASP9	0.0106092	Up	0.00397733	0.00455696	842
KIRP	CASP8	cg14962032_CASP8	-0.0105832	Down	0.00139443	0.00169176	841
KIRP	NLRC4	cg07055315_NLRC4	0.0502441	Up	0.00104938	0.00129456	58484
KIRP	GPX4	cg19512730_GPX4	-0.00299225	Down	0.000973253	0.00120614	2879
KIRP	CASP4	cg16669455_CASP4	-0.0460663	Down	9.1076e-05	0.000126649	837
KIRP	TNF	cg21467614_TNF	-0.0822927	Down	7.4924e-06	1.1608e-05	7124
KIRP	AIM2	cg00490406_AIM2	-0.0696902	Down	4.67574e-06	7.3874e-06	9447
KIRP	PJVK	cg15658577_DFNB59	-0.00317814	Down	2.78039e-06	4.48265e-06	494513
KIRP	NLRP6	cg11717054_NLRP6	0.0637642	Up	1.62263e-06	2.67242e-06	171389
KIRP	CASP3	cg13111919_CASP3	-0.0169677	Down	1.168e-07	2.14541e-07	836
KIRP	GSDMB	cg03190929_GSDMB	-0.0158189	Down	2.24101e-08	4.37975e-08	55876
KIRP	ELANE	cg08269974_ELANE	0.107558	Up	3.88842e-09	8.12435e-09	1991
KIRP	NOD2	cg04172533_NOD2	-0.0679841	Down	1.38401e-09	3.01295e-09	64127
KIRP	IL1B	cg01290568_IL1B	-0.0582938	Down	4.32602e-11	1.05761e-10	3553
KIRP	PLCG1	cg07893801_PLCG1	0.116309	Up	1.24108e-11	3.15485e-11	5335
KIRP	CASP1	cg13802966_CASP1	-0.0990633	Down	1.29345e-12	3.56507e-12	834
KIRP	NOD1	cg04071779_NOD1	-0.0380038	Down	5.89727e-15	1.92623e-14	10392
KIRP	TIRAP	cg15699874_TIRAP	0.00882516	Up	4.39222e-20	2.04222e-19	114609
KIRP	GSDMD	cg10675725_GSDMD	-0.0620043	Down	3.99841e-24	2.46167e-23	79792
KIRP	NLRP3	cg21991396_NLRP3	-0.0800542	Down	1.86183e-26	1.34885e-25	114548
KIRP	CASP6	cg08152567_CASP6	-0.0277093	Down	8.67129e-28	6.97566e-27	839
KIRP	NLRP7	cg08211199_NLRP7	0.101965	Up	3.83928e-28	3.1725e-27	199713
KIRP	NLRP1	cg09205190_NLRP1	0.12075	Up	7.38183e-29	6.36134e-28	22861
KIRP	GSDME	cg17569154_DFNA5	-0.162646	Down	1.62978e-29	1.477e-28	1687
KIRP	IL18	cg04100971_IL18	0.178924	Up	7.55523e-30	7.03105e-29	3606
KIRP	GSDMC	cg05316065_GSDMC	0.170109	Up	3.13639e-34	4.00436e-33	56169
LIHC	CASP3	cg07234880_CASP3	0.0031853	Up	0.0191026	0.0198212	836
LIHC	TNF	cg21370522_TNF	-0.05218	Down	0.00199757	0.00228723	7124
LIHC	IL1B	cg01290568_IL1B	0.0222015	Up	0.00123224	0.00143542	3553
LIHC	PYCARD	cg05907835_PYCARD	-0.0562679	Down	0.000840821	0.000992718	29108
LIHC	TIRAP	cg15573846_TIRAP	-0.0207334	Down	0.000238814	0.000295418	114609
LIHC	NLRP2	cg24040502_NLRP2	-0.0733518	Down	7.5896e-05	9.7604e-05	55655
LIHC	NLRC4	cg22805603_NLRC4	0.0665399	Up	2.3216e-05	3.0917e-05	58484
LIHC	PRKACA	cg01596520_PRKACA	-0.0549695	Down	1.8205e-05	2.4435e-05	5566
LIHC	PLCG1	cg06493829_PLCG1	-0.0746912	Down	5.80583e-07	8.65089e-07	5335
LIHC	NLRP6	cg15451020_NLRP6	0.115687	Up	5.3266e-07	7.96493e-07	171389
LIHC	CASP9	cg16706559_CASP9	0.00676054	Up	3.00947e-10	5.55765e-10	842
LIHC	CASP1	cg21002651_CASP1	0.0365332	Up	9.23734e-11	1.76595e-10	834
LIHC	ELANE	cg08269974_ELANE	0.138945	Up	1.37808e-12	2.93804e-12	1991
LIHC	NLRP1	cg26561413_NLRP1	-0.108319	Down	3.83806e-13	8.47404e-13	22861
LIHC	CASP8	cg13109397_CASP8	0.0286795	Up	2.06702e-13	4.63732e-13	841
LIHC	AIM2	cg00490406_AIM2	-0.129771	Down	1.62833e-13	3.67583e-13	9447
LIHC	CASP5	cg11905407_CASP5	-0.0584314	Down	1.88092e-14	4.46074e-14	838
LIHC	GSDME	cg03995857_DFNA5	0.0843237	Up	1.40969e-14	3.36454e-14	1687
LIHC	NLRP3	cg03505654_NLRP3	-0.291434	Down	9.77293e-30	5.0782e-29	114548
LIHC	GSDMC	cg23990303_GSDMC	-0.173344	Down	1.07473e-33	6.84272e-33	56169
LIHC	GSDMB	cg16822095_GSDMB	-0.1518	Down	3.06638e-42	3.00528e-41	55876
LIHC	GSDMD	cg10074813_GSDMD	-0.123931	Down	1.38568e-45	1.60019e-44	79792
LIHC	IL6	cg07998387_IL6	-0.260059	Down	1.04036e-45	1.20888e-44	3569
LIHC	NLRP7	cg14928510_NLRP7	-0.319431	Down	6.35737e-46	7.47348e-45	199713
LIHC	GSDMA	cg24910161_GSDMA	-0.205238	Down	1.85282e-47	2.4218e-46	284110
LUAD	IL1B	cg15836722_IL1B	-0.0223512	Down	0.0344989	0.034539	3553
LUAD	CASP3	cg20176042_CASP3	-0.0108315	Down	0.0279731	0.0284549	836
LUAD	IL6	cg15703690_IL6	0.0240035	Up	0.00141563	0.00168782	3569
LUAD	NLRP6	cg02471658_NLRP6	0.0389464	Up	0.000523862	0.000651542	171389
LUAD	NLRP1	cg14649267_NLRP1	-0.0288056	Down	0.00012632	0.000167132	22861
LUAD	GSDMA	cg24910161_GSDMA	-0.0466554	Down	6.17922e-06	9.1067e-06	284110
LUAD	TNF	cg02137984_TNF	-0.0432107	Down	5.91623e-07	9.45216e-07	7124
LUAD	GSDMD	cg06043315_GSDMD	-0.040454	Down	2.60639e-07	4.27467e-07	79792
LUAD	NOD2	cg04172533_NOD2	0.0774065	Up	2.39437e-08	4.22673e-08	64127
LUAD	TIRAP	cg15932284_TIRAP	-0.0480377	Down	1.58293e-08	2.82912e-08	114609
LUAD	NLRP3	cg03505654_NLRP3	-0.0921274	Down	2.79836e-09	5.27369e-09	114548
LUAD	GSDMC	cg05316065_GSDMC	-0.0679454	Down	3.04744e-11	6.64534e-11	56169
LUAD	IL18	cg04100971_IL18	0.0839272	Up	8.30898e-12	1.89094e-11	3606
LUAD	CASP1	cg21002651_CASP1	0.0390546	Up	2.14251e-12	5.07929e-12	834
LUAD	PLCG1	cg07893801_PLCG1	0.119557	Up	1.2051e-12	2.91197e-12	5335
LUAD	PYCARD	cg05907835_PYCARD	0.0654154	Up	2.08671e-13	5.33852e-13	29108
LUAD	GPX4	cg14894245_GPX4	-0.105026	Down	4.38575e-14	1.18104e-13	2879
LUAD	NLRP7	cg14928510_NLRP7	-0.169082	Down	4.33867e-18	1.56363e-17	199713
LUAD	NLRC4	cg07055315_NLRC4	0.120172	Up	1.03073e-18	3.88799e-18	58484
LUAD	NOD1	cg09579281_NOD1	0.157597	Up	1.85075e-20	7.90705e-20	10392
LUAD	CASP5	cg10825847_CASP5	-0.0780564	Down	4.00368e-26	2.56987e-25	838
LUAD	GSDME	cg04770504_DFNA5	0.0820596	Up	6.80223e-27	4.60411e-26	1687
LUAD	ELANE	cg26717554_ELANE	0.286872	Up	8.37156e-28	6.05043e-27	1991
LUAD	AIM2	cg00490406_AIM2	-0.225913	Down	9.9327e-34	1.04697e-32	9447
LUAD	GSDMB	cg16822095_GSDMB	-0.202223	Down	1.81316e-37	2.40849e-36	55876
LUAD	CASP8	cg26799474_CASP8	-0.348351	Down	1.70678e-52	5.23239e-51	841
LUSC	NLRP2	cg24040502_NLRP2	-0.0507719	Down	0.0318582	0.032162	55655
LUSC	GSDME	cg09333471_DFNA5	0.0171483	Up	0.0168166	0.0172302	1687
LUSC	TIRAP	cg10291648_TIRAP	0.00525071	Up	0.00336129	0.00358367	114609
LUSC	NOD2	cg06181567_NOD2	-0.039362	Down	0.000918867	0.0010096	64127
LUSC	GPX4	cg25540845_GPX4	0.00485661	Up	0.000877501	0.000965118	2879
LUSC	CASP1	cg21002651_CASP1	0.0121663	Up	0.000285983	0.000323284	834
LUSC	NLRP1	cg14649267_NLRP1	-0.0216186	Down	1.6694e-05	2.0216e-05	22861
LUSC	IL18	cg04100971_IL18	0.0620749	Up	5.35326e-06	6.6323e-06	3606
LUSC	NLRP6	cg06432119_NLRP6	0.0744399	Up	1.03006e-08	1.47186e-08	171389
LUSC	NLRC4	cg22713339_NLRC4	-0.0236646	Down	6.98621e-09	1.00685e-08	58484
LUSC	TNF	cg01360627_TNF	-0.0792327	Down	4.25069e-10	6.50947e-10	7124
LUSC	ELANE	cg08269974_ELANE	0.134301	Up	2.33491e-10	3.61671e-10	1991
LUSC	GSDMA	cg24092444_GSDMA	-0.0398267	Down	7.87232e-12	1.3168e-11	284110
LUSC	GSDMC	cg26073844_GSDMC	-0.101412	Down	4.22654e-12	7.16008e-12	56169
LUSC	PRKACA	cg15814923_PRKACA	0.00336624	Up	4.03055e-12	6.83338e-12	5566
LUSC	PJVK	cg15658577_DFNB59	-0.0073708	Down	5.64843e-13	9.97571e-13	494513
LUSC	GSDMD	cg23101464_GSDMD	0.0393394	Up	5.1273e-13	9.08164e-13	79792
LUSC	CASP4	cg08469834_CASP4	0.0174596	Up	8.63578e-14	1.5877e-13	837
LUSC	CASP6	cg05295810_CASP6	0.00745552	Up	6.51011e-14	1.20489e-13	839
LUSC	IL1B	cg01290568_IL1B	-0.0908051	Down	2.40755e-14	4.55147e-14	3553
LUSC	NLRP3	cg03505654_NLRP3	-0.16649	Down	3.98373e-17	8.73715e-17	114548
LUSC	CASP5	cg10825847_CASP5	-0.106978	Down	5.24352e-22	1.47677e-21	838
LUSC	CASP9	cg24483825_CASP9	0.0161907	Up	8.89244e-24	2.72712e-23	842
LUSC	IL6	cg15703690_IL6	0.11481	Up	5.59925e-27	2.01417e-26	3569
LUSC	CASP3	cg16792066_CASP3	0.0105141	Up	4.21862e-28	1.61185e-27	836
LUSC	NOD1	cg05798501_NOD1	0.233957	Up	1.58413e-29	6.47281e-29	10392
LUSC	PLCG1	cg06457011_PLCG1	0.209218	Up	2.52417e-33	1.21583e-32	5335
LUSC	GSDMB	cg16822095_GSDMB	-0.122777	Down	3.46335e-37	1.99391e-36	55876
LUSC	AIM2	cg00490406_AIM2	-0.242764	Down	7.36504e-38	4.35701e-37	9447
LUSC	NLRP7	cg14928510_NLRP7	-0.316205	Down	3.66259e-43	2.75462e-42	199713
LUSC	CASP8	cg26799474_CASP8	-0.430893	Down	9.00217e-76	2.90759e-74	841
PAAD	CASP9	cg16706559_CASP9	0.00422346	Up	0.0128544	0.0144865	842
PAAD	PRKACA	cg26670249_PRKACA	0.140579	Up	0.00805925	0.00993541	5566
PAAD	CASP8	cg14962032_CASP8	0.0163709	Up	0.00744172	0.00930393	841
PAAD	NLRC4	cg22805603_NLRC4	0.157461	Up	0.00529316	0.00707785	58484
PAAD	GPX4	cg11784697_GPX4	0.00393464	Up	0.00481846	0.00657521	2879
PAAD	PYCARD	cg09055507_PYCARD	-0.071729	Down	0.00365948	0.00524192	29108
PAAD	TIRAP	cg15699874_TIRAP	0.0111411	Up	0.00160974	0.00269455	114609
PAAD	ELANE	cg26717554_ELANE	0.166592	Up	0.00103714	0.00186851	1991
PAAD	CASP3	cg07234880_CASP3	0.0043898	Up	0.00063369	0.00124958	836
PAAD	GSDMA	cg24910161_GSDMA	-0.161137	Down	0.000198473	0.000478624	284110
PAAD	GSDMC	cg05316065_GSDMC	-0.155054	Down	3.9202e-05	0.000123346	56169
PAAD	GSDMB	cg10057218_GSDMB	-0.209507	Down	1.3118e-05	4.9981e-05	55876
PAAD	NLRP6	cg06432119_NLRP6	0.0688756	Up	2.17142e-06	1.0911e-05	171389
PRAD	GSDMB	cg03190929_GSDMB	-0.00544305	Down	0.00743637	0.0080384	55876
PRAD	NLRP6	cg16359142_NLRP6	0.0234257	Up	0.00444629	0.00491522	171389
PRAD	NLRP7	cg08211199_NLRP7	0.0434417	Up	0.00234993	0.00267251	199713
PRAD	IL1B	cg01290568_IL1B	0.0244418	Up	0.00208163	0.00237937	3553
PRAD	NLRC4	cg22805603_NLRC4	-0.0269769	Down	0.00176812	0.00203464	58484
PRAD	CASP3	cg11691938_CASP3	-0.00529902	Down	7.0535e-05	9.183e-05	836
PRAD	GSDMC	cg05316065_GSDMC	-0.0481346	Down	6.1589e-05	8.0755e-05	56169
PRAD	ELANE	cg21586152_ELANE	0.0904143	Up	2.6301e-05	3.5738e-05	1991
PRAD	GSDME	cg19706795_DFNA5	0.0401604	Up	1.215e-05	1.7042e-05	1687
PRAD	PLCG1	cg07893801_PLCG1	0.097344	Up	9.90415e-07	1.53272e-06	5335
PRAD	IL18	cg11304234_IL18	0.106137	Up	5.15266e-07	8.17196e-07	3606
PRAD	TIRAP	cg09036154_TIRAP	0.00138273	Up	1.36047e-07	2.26793e-07	114609
PRAD	NOD2	cg01243823_NOD2	0.0890283	Up	8.20882e-08	1.39316e-07	64127
PRAD	NLRP3	cg07313373_NLRP3	0.0898659	Up	1.0704e-08	1.97444e-08	114548
PRAD	NLRP1	cg07442907_NLRP1	0.106206	Up	8.44529e-09	1.57106e-08	22861
PRAD	CASP8	cg01466121_CASP8	0.0658968	Up	2.79754e-10	5.97557e-10	841
PRAD	PRKACA	cg26670249_PRKACA	0.0811956	Up	6.54311e-16	2.3868e-15	5566
PRAD	TNF	cg21467614_TNF	0.198299	Up	6.72281e-17	2.68855e-16	7124
PRAD	CASP1	cg21002651_CASP1	0.107494	Up	1.27322e-18	6.11607e-18	834
PRAD	AIM2	cg00490406_AIM2	-0.116133	Down	4.44582e-20	2.48642e-19	9447
PRAD	PYCARD	cg05214748_PYCARD	0.245266	Up	2.28259e-23	1.92411e-22	29108
PRAD	IL6	cg13104385_IL6	-0.137914	Down	4.65049e-28	7.81204e-27	3569
PRAD	GSDMD	cg23101464_GSDMD	0.284751	Up	3.36143e-28	5.76427e-27	79792
PRAD	CASP5	cg14758526_CASP5	-0.0855605	Down	7.65015e-34	2.59777e-32	838
THCA	GSDMB	cg13212159_GSDMB	0.0100715	Up	0.0140216	0.0149874	55876
THCA	PLCG1	cg07893801_PLCG1	-0.0340664	Down	0.0130994	0.014122	5335
THCA	IL18	cg04929355_IL18	-0.015661	Down	0.00269745	0.00343996	3606
THCA	IL6	cg05265849_IL6	-0.0390025	Down	0.00202323	0.00265297	3569
THCA	CASP4	cg16669455_CASP4	-0.045953	Down	0.0012391	0.00169249	837
THCA	GSDMC	cg23990303_GSDMC	-0.0221254	Down	0.000966066	0.00134656	56169
THCA	NLRC4	cg22805603_NLRC4	0.0341382	Up	0.000704056	0.00100512	58484
THCA	AIM2	cg11003133_AIM2	0.0475116	Up	0.000545523	0.000794448	9447
THCA	PYCARD	cg05214748_PYCARD	0.0458791	Up	5.62506e-06	1.0963e-05	29108
THCA	NLRP6	cg22331032_NLRP6	0.0401048	Up	1.82268e-06	3.77686e-06	171389
THCA	GSDME	cg25723149_DFNA5	-0.0593111	Down	1.65707e-06	3.44726e-06	1687
THCA	CASP1	cg13802966_CASP1	-0.0820015	Down	2.02156e-07	4.66091e-07	834
THCA	NLRP3	cg21991396_NLRP3	-0.0202944	Down	5.36363e-08	1.31739e-07	114548
THCA	GSDMD	cg10675725_GSDMD	-0.0461715	Down	4.4031e-18	2.52579e-17	79792
THCA	NLRP1	cg07442907_NLRP1	-0.189709	Down	8.34933e-22	5.96305e-21	22861
THCA	PRKACA	cg03856723_PRKACA	-0.0723475	Down	9.56408e-28	9.32675e-27	5566
THCA	CASP5	cg10825847_CASP5	-0.180345	Down	6.64636e-37	1.0294e-35	838
THCA	GPX4	cg14894245_GPX4	-0.205634	Down	1.55073e-52	4.29797e-51	2879
THCA	GSDMA	cg24910161_GSDMA	-0.223413	Down	9.58141e-57	3.05176e-55	284110
THCA	NOD1	cg16680624_NOD1	-0.251282	Down	2.88079e-108	6.69593e-106	10392
UCEC	NLRP6	cg16359142_NLRP6	0.021092	Up	0.0204812	0.0213366	171389
UCEC	NLRC4	cg22805603_NLRC4	-0.0450456	Down	0.00516694	0.0058305	58484
UCEC	GSDMA	cg24910161_GSDMA	-0.0416706	Down	0.0035532	0.00408537	284110
UCEC	PYCARD	cg05907835_PYCARD	0.0544318	Up	0.000759206	0.000930838	29108
UCEC	PLCG1	cg07893801_PLCG1	0.0575864	Up	0.000283529	0.000359647	5335
UCEC	CASP4	cg08469834_CASP4	0.0134486	Up	0.000215645	0.00027591	837
UCEC	CASP5	cg14758526_CASP5	-0.0331766	Down	3.2059e-05	4.3611e-05	838
UCEC	GSDMD	cg26711732_GSDMD	-0.0247872	Down	8.74033e-06	1.2365e-05	79792
UCEC	GSDMB	cg16822095_GSDMB	-0.0412813	Down	4.20749e-06	6.07507e-06	55876
UCEC	TIRAP	cg16337273_TIRAP	0.0944761	Up	6.26803e-07	9.55856e-07	114609
UCEC	GSDME	cg09333471_DFNA5	0.0947588	Up	1.34653e-09	2.40239e-09	1687
UCEC	ELANE	cg21586152_ELANE	0.124558	Up	1.2499e-10	2.36152e-10	1991
UCEC	CASP1	cg21002651_CASP1	0.0832682	Up	5.85318e-11	1.1277e-10	834
UCEC	GSDMC	cg26073844_GSDMC	-0.222704	Down	1.76334e-14	4.1761e-14	56169
UCEC	NOD2	cg16771652_NOD2	-0.181748	Down	9.97344e-16	2.54059e-15	64127
UCEC	PRKACA	cg26670249_PRKACA	0.275135	Up	6.3945e-21	2.21203e-20	5566
UCEC	CASP8	cg01466121_CASP8	0.108058	Up	5.18094e-22	1.92835e-21	841
UCEC	AIM2	cg00490406_AIM2	-0.190898	Down	1.64089e-26	7.90046e-26	9447
UCEC	NOD1	cg06557644_NOD1	0.301784	Up	1.33528e-27	6.85785e-27	10392
UCEC	NLRP7	cg18778097_NLRP7	-0.20343	Down	1.71111e-45	2.11298e-44	199713

## Sheet: Table S5
Table S5 Correlation of DNA methylation with pyroptosis genes expression
Cancer_type	Symbol	Gene	Spearman	FDR	Entrez
ACC	AIM2	cg00490406_AIM2	-0.447242	3.5926e-05	9447
ACC	CASP1	cg21002651_CASP1	-0.732449	0	834
ACC	CASP3	cg16792066_CASP3	-0.37203	0.000796602	836
ACC	CASP4	cg08469834_CASP4	-0.486295	7.31034e-06	837
ACC	CASP5	cg11905407_CASP5	-0.0605306	0.596168	838
ACC	CASP6	cg03797115_CASP6	-0.343963	0.00201825	839
ACC	CASP8	cg25095814_CASP8	-0.440239	5.8503e-05	841
ACC	CASP9	cg26194092_CASP9	-0.265044	0.0184963	842
ACC	ELANE	cg15530560_ELANE	-0.300808	0.00706589	1991
ACC	GPX4	cg14894245_GPX4	-0.336636	0.00253977	2879
ACC	GSDMA	cg04756853_GSDMA	-0.258616	0.0213754	284110
ACC	GSDMB	cg21499348_GSDMB	-0.123077	0.279244	55876
ACC	GSDMC	cg05316065_GSDMC	-0.253387	0.0242491	56169
ACC	GSDMD	cg23101464_GSDMD	-0.793062	0	79792
ACC	GSDME	cg00473134_DFNA5	-0.522176	1.18431e-06	1687
ACC	IL18	cg26534425_IL18	-0.583155	3.2472e-08	3606
ACC	IL1B	cg01290568_IL1B	-0.549176	1.59883e-07	3553
ACC	IL6	cg05265849_IL6	-0.16336	0.150289	3569
ACC	NLRC4	cg22713339_NLRC4	-0.0911392	0.42361	58484
ACC	NLRP1	cg00268086_NLRP1	-0.40684	0.000224334	22861
ACC	NLRP2	cg24040502_NLRP2	-0.71374	1.55163e-13	55655
ACC	NLRP3	cg21991396_NLRP3	-0.287999	0.0102832	114548
ACC	NLRP6	cg16293853_NLRP6	-0.0914071	0.423031	171389
ACC	NLRP7	cg13650654_NLRP7	0.0734133	0.520237	199713
ACC	NOD1	cg09579281_NOD1	-0.384323	0.000516842	10392
ACC	NOD2	cg26954174_NOD2	-0.483617	8.31328e-06	64127
ACC	PJVK	cg25102782_DFNB59	-0.00929893	0.935108	494513
ACC	PLCG1	cg01147995_PLCG1	-0.208617	0.0651542	5335
ACC	PRKACA	cg26670249_PRKACA	-0.475	1.2491e-05	5566
ACC	PYCARD	cg09866102_PYCARD	-0.774684	0	29108
ACC	TIRAP	cg26202340_TIRAP	-0.239167	0.034006	114609
ACC	TNF	cg02137984_TNF	-0.328534	0.00311602	7124
BLCA	AIM2	cg00490406_AIM2	-0.572043	7.84093e-37	9447
BLCA	CASP1	cg21002651_CASP1	-0.53131	0	834
BLCA	CASP3	cg07234880_CASP3	-0.187204	0.000142718	836
BLCA	CASP4	cg16669455_CASP4	-0.294634	1.55177e-09	837
BLCA	CASP5	cg14758526_CASP5	-0.000692241	0.988878	838
BLCA	CASP6	cg27274728_CASP6	-0.142915	0.00384697	839
BLCA	CASP8	cg26799474_CASP8	-0.420295	0	841
BLCA	CASP9	cg02612026_CASP9	-0.319786	4.81252e-11	842
BLCA	ELANE	cg08269974_ELANE	-0.135716	0.00603959	1991
BLCA	GPX4	cg24783234_GPX4	-0.0742454	0.134312	2879
BLCA	GSDMA	cg26162295_GSDMA	-0.190349	0.000109511	284110
BLCA	GSDMB	cg16822095_GSDMB	-0.540336	0	55876
BLCA	GSDMC	cg05316065_GSDMC	0.147814	0.00276264	56169
BLCA	GSDMD	cg23101464_GSDMD	-0.445064	0	79792
BLCA	GSDME	cg24805239_DFNA5	-0.430461	0	1687
BLCA	IL18	cg09122223_IL18	-0.177666	0.000316911	3606
BLCA	IL1B	cg01290568_IL1B	-0.651491	0	3553
BLCA	IL6	cg00087425_IL6	-0.117667	0.0174198	3569
BLCA	NLRC4	cg22713339_NLRC4	-0.00869934	0.860877	58484
BLCA	NLRP1	cg07442907_NLRP1	-0.525395	2.49e-30	22861
BLCA	NLRP2	cg24040502_NLRP2	-0.770097	2.8007e-81	55655
BLCA	NLRP3	cg26112639_NLRP3	-0.0698821	0.158853	114548
BLCA	NLRP6	cg11717054_NLRP6	-0.120241	0.0150937	171389
BLCA	NLRP7	cg14928510_NLRP7	0.0702082	0.156912	199713
BLCA	NOD1	cg19071544_NOD1	-0.291573	2.31639e-09	10392
BLCA	NOD2	cg06181567_NOD2	-0.427865	0	64127
BLCA	PJVK	cg03724445_DFNB59	-0.0666833	0.178776	494513
BLCA	PLCG1	cg06457011_PLCG1	-0.385366	3.79038e-16	5335
BLCA	PRKACA	cg20110535_PRKACA	-0.206504	2.732e-05	5566
BLCA	PYCARD	cg05214748_PYCARD	-0.451268	0	29108
BLCA	TIRAP	cg16337273_TIRAP	-0.188795	0.000128289	114609
BLCA	TNF	cg01360627_TNF	-0.230674	2.49244e-06	7124
BRCA	AIM2	cg00490406_AIM2	-0.277894	2.37419e-13	9447
BRCA	CASP1	cg21002651_CASP1	-0.578048	1.60123e-61	834
BRCA	CASP3	cg20176042_CASP3	-0.0476216	0.216246	836
BRCA	CASP4	cg08469834_CASP4	-0.329048	1.54152e-18	837
BRCA	CASP5	cg10825847_CASP5	-0.210557	3.26811e-08	838
BRCA	CASP6	cg27274728_CASP6	-0.115016	0.002746	839
BRCA	CASP8	cg26799474_CASP8	-0.411118	5.9249e-29	841
BRCA	CASP9	cg24483825_CASP9	-0.317712	2.54983e-17	842
BRCA	ELANE	cg08269974_ELANE	-0.112059	0.00353028	1991
BRCA	GPX4	cg18061485_GPX4	-0.199947	1.58835e-07	2879
BRCA	GSDMA	cg08995595_GSDMA	-0.180177	2.42236e-06	284110
BRCA	GSDMB	cg13212159_GSDMB	-0.386039	1.90081e-25	55876
BRCA	GSDMC	cg26073844_GSDMC	-0.479254	4.09294e-40	56169
BRCA	GSDMD	cg10074813_GSDMD	-0.267857	1.42926e-12	79792
BRCA	GSDME	cg04770504_DFNA5	-0.210149	3.7513e-08	1687
BRCA	IL18	cg26534425_IL18	-0.507369	1.66e-45	3606
BRCA	IL1B	cg01290568_IL1B	-0.358827	5.69178e-22	3553
BRCA	IL6	cg13104385_IL6	-0.0910162	0.017935	3569
BRCA	NLRC4	cg21028608_NLRC4	0.01598	0.678333	58484
BRCA	NLRP1	cg22642477_NLRP1	-0.253867	2.10781e-11	22861
BRCA	NLRP2	cg24040502_NLRP2	-0.728102	1.20376e-112	55655
BRCA	NLRP3	cg03505654_NLRP3	-0.0189014	0.623645	114548
BRCA	NLRP6	cg02925222_NLRP6	-0.0211035	0.583873	171389
BRCA	NLRP7	cg14928510_NLRP7	0.0191942	0.618363	199713
BRCA	NOD1	cg09579281_NOD1	-0.356813	0	10392
BRCA	NOD2	cg16771652_NOD2	-0.568158	4.8145e-59	64127
BRCA	PJVK	cg23246789_DFNB59	-0.0356757	0.35437	494513
BRCA	PLCG1	cg06457011_PLCG1	-0.363185	0	5335
BRCA	PRKACA	cg26670249_PRKACA	-0.222527	4.96117e-09	5566
BRCA	PYCARD	cg09055507_PYCARD	-0.429025	0	29108
BRCA	TIRAP	cg09036154_TIRAP	-0.224746	3.81986e-09	114609
BRCA	TNF	cg01360627_TNF	-0.390905	0	7124
CESC	AIM2	cg00490406_AIM2	-0.782369	0	9447
CESC	CASP1	cg21002651_CASP1	-0.359179	1.47389e-10	834
CESC	CASP3	cg16792066_CASP3	-0.300833	1.02937e-07	836
CESC	CASP4	cg12407979_CASP4	-0.114418	0.0462757	837
CESC	CASP5	cg10825847_CASP5	-0.131608	0.0217218	838
CESC	CASP6	cg25116460_CASP6	-0.198757	0.000501985	839
CESC	CASP8	cg20418725_CASP8	-0.0765153	0.183234	841
CESC	CASP9	cg02612026_CASP9	-0.266005	2.78216e-06	842
CESC	ELANE	cg21586152_ELANE	-0.216776	0.000139285	1991
CESC	GPX4	cg01613691_GPX4	-0.138445	0.0157704	2879
CESC	GSDMA	cg19422138_GSDMA	-0.106943	0.0625646	284110
CESC	GSDMB	cg16822095_GSDMB	-0.570619	0	55876
CESC	GSDMC	cg26073844_GSDMC	-0.139794	0.0147735	56169
CESC	GSDMD	cg06043315_GSDMD	-0.194317	0.000671927	79792
CESC	GSDME	cg09333471_DFNA5	-0.521344	0	1687
CESC	IL18	cg04100971_IL18	0.21945	0.000118813	3606
CESC	IL1B	cg01290568_IL1B	-0.460897	0	3553
CESC	IL6	cg02335517_IL6	-0.165651	0.00381291	3569
CESC	NLRC4	cg22805603_NLRC4	-0.0311386	0.588636	58484
CESC	NLRP1	cg00268086_NLRP1	-0.481694	0	22861
CESC	NLRP2	cg24040502_NLRP2	-0.827711	0	55655
CESC	NLRP3	cg03505654_NLRP3	-0.276414	1.08655e-06	114548
CESC	NLRP6	cg06432119_NLRP6	-0.133759	0.0196458	171389
CESC	NLRP7	cg14928510_NLRP7	-0.351278	2.94857e-10	199713
CESC	NOD1	cg02968854_NOD1	-0.168216	0.00329759	10392
CESC	NOD2	cg16771652_NOD2	-0.347659	5.99933e-10	64127
CESC	PJVK	cg23246789_DFNB59	-0.0953634	0.0969701	494513
CESC	PLCG1	cg24961795_PLCG1	-0.443261	0	5335
CESC	PRKACA	cg26613742_PRKACA	-0.282209	6.33251e-07	5566
CESC	PYCARD	cg08730348_PYCARD	-0.336402	2.23721e-09	29108
CESC	TIRAP	cg21533667_TIRAP	-0.316803	1.63265e-08	114609
CESC	TNF	cg06825478_TNF	-0.3557	2.26637e-10	7124
CHOL	AIM2	cg00490406_AIM2	-0.610811	0.000105843	9447
CHOL	CASP1	cg13802966_CASP1	-0.344144	0.040458	834
CHOL	CASP3	cg20176042_CASP3	-0.402059	0.0156806	836
CHOL	CASP4	cg15665081_CASP4	-0.0326898	0.849681	837
CHOL	CASP5	cg10825847_CASP5	-0.535473	0.000764475	838
CHOL	CASP6	cg25116460_CASP6	-0.334363	0.0468078	839
CHOL	CASP8	cg09464206_CASP8	-0.0867439	0.613731	841
CHOL	CASP9	cg21449655_CASP9	-0.227027	0.18241	842
CHOL	ELANE	cg02487452_ELANE	-0.396272	0.0167298	1991
CHOL	GPX4	cg01588546_GPX4	-0.208494	0.221499	2879
CHOL	GSDMA	cg26162295_GSDMA	-0.384452	0.0206087	284110
CHOL	GSDMB	cg16822095_GSDMB	-0.53462	0.000932158	55876
CHOL	GSDMC	cg26073844_GSDMC	-0.361647	0.030858	56169
CHOL	GSDMD	cg06043315_GSDMD	-0.443501	0.00722108	79792
CHOL	GSDME	cg03995857_DFNA5	-0.3287	0.0508392	1687
CHOL	IL18	cg26534425_IL18	-0.705534	3.3845e-06	3606
CHOL	IL1B	cg20157753_IL1B	-0.345689	0.039523	3553
CHOL	IL6	cg15703690_IL6	-0.163846	0.339651	3569
CHOL	NLRC4	cg07055315_NLRC4	0.0236808	0.890972	58484
CHOL	NLRP1	cg07442907_NLRP1	-0.597169	0.000162278	22861
CHOL	NLRP2	cg24040502_NLRP2	-0.812613	1.64158e-07	55655
CHOL	NLRP3	cg03505654_NLRP3	-0.215959	0.205111	114548
CHOL	NLRP6	cg22331032_NLRP6	-0.385071	0.0210325	171389
CHOL	NLRP7	cg27131908_NLRP7	0.00145907	0.993262	199713
CHOL	NOD1	cg04071779_NOD1	-0.339768	0.0432056	10392
CHOL	NOD2	cg16771652_NOD2	-0.399743	0.0163343	64127
CHOL	PJVK	cg25102782_DFNB59	-0.173488	0.310318	494513
CHOL	PLCG1	cg06493829_PLCG1	-0.457658	0.00542804	5335
CHOL	PRKACA	cg26670249_PRKACA	-0.525354	0.00117646	5566
CHOL	PYCARD	cg15247144_PYCARD	-0.123552	0.471343	29108
CHOL	TIRAP	cg02973469_TIRAP	-0.165251	0.334125	114609
CHOL	TNF	cg01360627_TNF	-0.436551	0.00827444	7124
COAD	AIM2	cg11003133_AIM2	-0.614126	2.2073e-29	9447
COAD	CASP1	cg21002651_CASP1	-0.555711	0	834
COAD	CASP3	cg16792066_CASP3	-0.235745	9.6076e-05	836
COAD	CASP4	cg15665081_CASP4	-0.0171607	0.778809	837
COAD	CASP5	cg10825847_CASP5	-0.356772	2.0693e-09	838
COAD	CASP6	cg03797115_CASP6	-0.336108	1.83072e-08	839
COAD	CASP8	cg23882545_CASP8	-0.0995853	0.102484	841
COAD	CASP9	cg25154447_CASP9	-0.310864	2.14212e-07	842
COAD	ELANE	cg08269974_ELANE	-0.349785	3.45077e-09	1991
COAD	GPX4	cg24783234_GPX4	-0.179296	0.00315065	2879
COAD	GSDMA	cg24910161_GSDMA	-0.494935	0	284110
COAD	GSDMB	cg10057218_GSDMB	-0.640529	0	55876
COAD	GSDMC	cg26073844_GSDMC	0.208237	0.000573937	56169
COAD	GSDMD	cg26711732_GSDMD	-0.224342	0.000209108	79792
COAD	GSDME	cg20764575_DFNA5	-0.38981	4.4214e-11	1687
COAD	IL18	cg09122223_IL18	-0.315965	1.32597e-07	3606
COAD	IL1B	cg15836722_IL1B	-0.249036	3.6987e-05	3553
COAD	IL6	cg00087425_IL6	-0.0608589	0.318891	3569
COAD	NLRC4	cg22805603_NLRC4	-0.30112	5.2285e-07	58484
COAD	NLRP1	cg09205190_NLRP1	0.186312	0.00214262	22861
COAD	NLRP2	cg24040502_NLRP2	-0.851784	3.26136e-77	55655
COAD	NLRP3	cg26112639_NLRP3	-0.335639	1.92011e-08	114548
COAD	NLRP6	cg11717054_NLRP6	-0.222312	0.000231235	171389
COAD	NLRP7	cg01879460_NLRP7	-0.19189	0.00153524	199713
COAD	NOD1	cg04071779_NOD1	-0.286492	1.88401e-06	10392
COAD	NOD2	cg06181567_NOD2	-0.439788	0	64127
COAD	PJVK	cg09890200_DFNB59	-0.132517	0.0295463	494513
COAD	PLCG1	cg07893801_PLCG1	-0.569373	0	5335
COAD	PRKACA	cg15814923_PRKACA	-0.271597	6.48239e-06	5566
COAD	PYCARD	cg05907835_PYCARD	-0.607821	0	29108
COAD	TIRAP	cg16337273_TIRAP	-0.131839	0.0303301	114609
COAD	TNF	cg09637172_TNF	-0.251892	2.9925e-05	7124
DLBC	AIM2	cg24659501_AIM2	-0.621472	4.13294e-06	9447
DLBC	CASP1	cg13802966_CASP1	-0.114959	0.435334	834
DLBC	CASP3	cg07234880_CASP3	-0.307859	0.0337122	836
DLBC	CASP4	cg16669455_CASP4	-0.517803	0.000202007	837
DLBC	CASP5	cg11905407_CASP5	-0.336175	0.0194841	838
DLBC	CASP6	cg22216491_CASP6	-0.285172	0.0498099	839
DLBC	CASP8	cg12604794_CASP8	-0.29429	0.0427137	841
DLBC	CASP9	cg12612238_CASP9	-0.210812	0.150027	842
DLBC	ELANE	cg19628469_ELANE	-0.236783	0.105152	1991
DLBC	GPX4	cg18061485_GPX4	0.0102041	0.945197	2879
DLBC	GSDMA	cg24092444_GSDMA	-0.216674	0.138822	284110
DLBC	GSDMB	cg21300187_GSDMB	-0.29277	0.0438349	55876
DLBC	GSDMC	cg05316065_GSDMC	-0.173091	0.239393	56169
DLBC	GSDMD	cg06114064_GSDMD	-0.23426	0.108969	79792
DLBC	GSDME	cg01733570_DFNA5	-0.277356	0.0566335	1687
DLBC	IL18	cg04929355_IL18	-0.104755	0.477381	3606
DLBC	IL1B	cg14117934_IL1B	-0.192466	0.189434	3553
DLBC	IL6	cg00087425_IL6	-0.0827747	0.57594	3569
DLBC	NLRC4	cg22805603_NLRC4	-0.533977	0.000118325	58484
DLBC	NLRP1	cg14649267_NLRP1	0.018997	0.897916	22861
DLBC	NLRP2	cg24040502_NLRP2	-0.92564	0	55655
DLBC	NLRP3	cg09226051_NLRP3	-0.473079	0.000784586	114548
DLBC	NLRP6	cg02925222_NLRP6	-0.635367	2.26286e-06	171389
DLBC	NLRP7	cg01879460_NLRP7	-0.457734	0.00107095	199713
DLBC	NOD1	cg15982261_NOD1	-0.324142	0.0250529	10392
DLBC	NOD2	cg06181567_NOD2	-0.446266	0.00163638	64127
DLBC	PJVK	cg25102782_DFNB59	-0.173904	0.236371	494513
DLBC	PLCG1	cg10848882_PLCG1	-0.306122	0.0347678	5335
DLBC	PRKACA	cg19302295_PRKACA	-0.551997	6.328e-05	5566
DLBC	PYCARD	cg05907835_PYCARD	0.120061	0.415118	29108
DLBC	TIRAP	cg09036154_TIRAP	-0.609314	6.90585e-06	114609
DLBC	TNF	cg04472685_TNF	-0.148611	0.312372	7124
ESCA	AIM2	cg00490406_AIM2	-0.721078	0	9447
ESCA	CASP1	cg13802966_CASP1	-0.240367	0.00104494	834
ESCA	CASP3	cg16792066_CASP3	-0.280341	0.000123293	836
ESCA	CASP4	cg08469834_CASP4	-0.452459	1.64838e-10	837
ESCA	CASP5	cg10825847_CASP5	-0.303547	2.8054e-05	838
ESCA	CASP6	cg05855157_CASP6	-0.203955	0.00556086	839
ESCA	CASP8	cg01466121_CASP8	-0.187324	0.0109818	841
ESCA	CASP9	cg21449655_CASP9	-0.319435	1.1013e-05	842
ESCA	ELANE	cg21586152_ELANE	-0.11566	0.117946	1991
ESCA	GPX4	cg01613691_GPX4	-0.0880083	0.234606	2879
ESCA	GSDMA	cg24092444_GSDMA	-0.166986	0.0234756	284110
ESCA	GSDMB	cg16822095_GSDMB	-0.810185	0	55876
ESCA	GSDMC	cg05316065_GSDMC	-0.322217	8.17563e-06	56169
ESCA	GSDMD	cg26711732_GSDMD	-0.236665	0.00125313	79792
ESCA	GSDME	cg09333471_DFNA5	-0.773391	0	1687
ESCA	IL18	cg04100971_IL18	-0.108622	0.142073	3606
ESCA	IL1B	cg07935264_IL1B	-0.348828	1.42933e-06	3553
ESCA	IL6	cg00087425_IL6	-0.0434282	0.557976	3569
ESCA	NLRC4	cg22713339_NLRC4	-0.104277	0.158798	58484
ESCA	NLRP1	cg26561413_NLRP1	-0.47547	8.43784e-12	22861
ESCA	NLRP2	cg24040502_NLRP2	-0.791499	8.97348e-41	55655
ESCA	NLRP3	cg07313373_NLRP3	-0.209168	0.00444556	114548
ESCA	NLRP6	cg15451020_NLRP6	-0.24442	0.00082655	171389
ESCA	NLRP7	cg01879460_NLRP7	-0.0869013	0.240806	199713
ESCA	NOD1	cg26956245_NOD1	-0.237152	0.00122371	10392
ESCA	NOD2	cg06181567_NOD2	-0.290626	6.7436e-05	64127
ESCA	PJVK	cg03724445_DFNB59	-0.112277	0.12908	494513
ESCA	PLCG1	cg06457011_PLCG1	-0.414473	6.8924e-09	5335
ESCA	PRKACA	cg08499107_PRKACA	-0.295149	5.135e-05	5566
ESCA	PYCARD	cg05907835_PYCARD	-0.325099	7.54699e-06	29108
ESCA	TIRAP	cg10291648_TIRAP	-0.28352	0.000102564	114609
ESCA	TNF	cg17755321_TNF	-0.450151	1.44492e-10	7124
GBM	AIM2	cg00490406_AIM2	-0.187199	0.18838	9447
GBM	CASP1	cg21002651_CASP1	-0.669231	2.2e-07	834
GBM	CASP3	cg11691938_CASP3	-0.221629	0.117929	836
GBM	CASP4	cg16669455_CASP4	-0.625792	1.67165e-06	837
GBM	CASP5	cg10825847_CASP5	-0.118419	0.407878	838
GBM	CASP6	cg01219048_CASP6	-0.0933937	0.513371	839
GBM	CASP8	cg01466121_CASP8	0.463167	0.000708206	841
GBM	CASP9	cg26194092_CASP9	-0.472851	0.000530784	842
GBM	ELANE	cg08269974_ELANE	-0.384016	0.00540285	1991
GBM	GPX4	cg04903600_GPX4	-0.246425	0.0814259	2879
GBM	GSDMA	cg26162295_GSDMA	-0.0627744	0.661664	284110
GBM	GSDMB	cg05842113_GSDMB	-0.287783	0.0409538	55876
GBM	GSDMC	cg05316065_GSDMC	-0.297209	0.0341751	56169
GBM	GSDMD	cg23101464_GSDMD	-0.60905	3.531e-06	79792
GBM	GSDME	cg07320646_DFNA5	-0.274389	0.0516679	1687
GBM	IL18	cg09122223_IL18	-0.316923	0.0238746	3606
GBM	IL1B	cg01290568_IL1B	-0.385158	0.00554176	3553
GBM	IL6	cg02335517_IL6	-0.340905	0.0147635	3569
GBM	NLRC4	cg22805603_NLRC4	-0.467783	0.000617862	58484
GBM	NLRP1	cg00268086_NLRP1	-0.608054	3.68856e-06	22861
GBM	NLRP2	cg24040502_NLRP2	-0.493303	0.00028109	55655
GBM	NLRP3	cg07313373_NLRP3	-0.345792	0.0133297	114548
GBM	NLRP6	cg03009397_NLRP6	-0.0696347	0.627284	171389
GBM	NLRP7	cg14928510_NLRP7	-0.205739	0.147508	199713
GBM	NOD1	cg09579281_NOD1	-0.311222	0.0266331	10392
GBM	NOD2	cg04172533_NOD2	-0.625882	1.66479e-06	64127
GBM	PJVK	cg15658577_DFNB59	-0.188507	0.184739	494513
GBM	PLCG1	cg07893801_PLCG1	-0.433575	0.0016308	5335
GBM	PRKACA	cg20110535_PRKACA	-0.373575	0.00724952	5566
GBM	PYCARD	cg12100791_PYCARD	-0.467602	0.000621199	29108
GBM	TIRAP	cg15699874_TIRAP	0.0153846	0.914605	114609
GBM	TNF	cg06825478_TNF	-0.176923	0.213584	7124
HNSC	AIM2	cg00490406_AIM2	-0.544249	0	9447
HNSC	CASP1	cg21002651_CASP1	-0.232578	8.85457e-08	834
HNSC	CASP3	cg07234880_CASP3	-0.21627	6.39465e-07	836
HNSC	CASP4	cg08469834_CASP4	-0.370363	0	837
HNSC	CASP5	cg10825847_CASP5	0.040862	0.3524	838
HNSC	CASP6	cg03797115_CASP6	-0.187541	1.7324e-05	839
HNSC	CASP8	cg05130485_CASP8	-0.161102	0.000229197	841
HNSC	CASP9	cg02612026_CASP9	-0.283499	4.55505e-11	842
HNSC	ELANE	cg08269974_ELANE	-0.123676	0.00473842	1991
HNSC	GPX4	cg01613691_GPX4	-0.257903	2.74555e-09	2879
HNSC	GSDMA	cg24092444_GSDMA	0.00222287	0.959657	284110
HNSC	GSDMB	cg16822095_GSDMB	-0.496758	0	55876
HNSC	GSDMC	cg26073844_GSDMC	0.0436237	0.32067	56169
HNSC	GSDMD	cg06043315_GSDMD	-0.0725265	0.0985135	79792
HNSC	GSDME	cg17569154_DFNA5	-0.358128	2.63595e-17	1687
HNSC	IL18	cg04100971_IL18	0.277781	1.14514e-10	3606
HNSC	IL1B	cg15836722_IL1B	-0.416686	0	3553
HNSC	IL6	cg02335517_IL6	-0.128869	0.00326155	3569
HNSC	NLRC4	cg21028608_NLRC4	0.0566264	0.197326	58484
HNSC	NLRP1	cg00268086_NLRP1	-0.269479	4.94537e-10	22861
HNSC	NLRP2	cg24040502_NLRP2	-0.79773	7.11507e-116	55655
HNSC	NLRP3	cg03505654_NLRP3	-0.189783	1.3679e-05	114548
HNSC	NLRP6	cg10330545_NLRP6	-0.245823	1.35077e-08	171389
HNSC	NLRP7	cg14928510_NLRP7	-0.225828	1.94346e-07	199713
HNSC	NOD1	cg26956245_NOD1	-0.265145	9.48479e-10	10392
HNSC	NOD2	cg16771652_NOD2	-0.221571	3.57019e-07	64127
HNSC	PJVK	cg06333167_DFNB59	-0.0939088	0.0322716	494513
HNSC	PLCG1	cg04964562_PLCG1	-0.147115	0.00077448	5335
HNSC	PRKACA	cg19302295_PRKACA	-0.246683	1.33989e-08	5566
HNSC	PYCARD	cg05214748_PYCARD	-0.187344	1.7084e-05	29108
HNSC	TIRAP	cg10291648_TIRAP	-0.283411	5.63719e-11	114609
HNSC	TNF	cg17741993_TNF	-0.204328	2.62934e-06	7124
KICH	AIM2	cg00490406_AIM2	-0.398809	0.000910554	9447
KICH	CASP1	cg13802966_CASP1	-0.574658	7.60816e-07	834
KICH	CASP3	cg14471096_CASP3	-0.322952	0.00842845	836
KICH	CASP4	cg05618647_CASP4	-0.396305	0.00107633	837
KICH	CASP5	cg10825847_CASP5	-0.284289	0.0207003	838
KICH	CASP6	cg27274728_CASP6	-0.154243	0.215709	839
KICH	CASP8	cg14962032_CASP8	-0.279825	0.0231831	841
KICH	CASP9	cg21449655_CASP9	-0.206596	0.0960397	842
KICH	ELANE	cg02487452_ELANE	-0.180662	0.146603	1991
KICH	GPX4	cg01613691_GPX4	-0.205344	0.0981059	2879
KICH	GSDMA	cg08995595_GSDMA	-0.289897	0.0182217	284110
KICH	GSDMB	cg23047335_GSDMB	-0.165974	0.18248	55876
KICH	GSDMC	cg05316065_GSDMC	-0.116293	0.351569	56169
KICH	GSDMD	cg26711732_GSDMD	-0.454838	0.00014712	79792
KICH	GSDME	cg20764575_DFNA5	-0.296942	0.0157718	1687
KICH	IL18	cg04929355_IL18	-0.638117	1.88444e-08	3606
KICH	IL1B	cg01290568_IL1B	-0.363407	0.00286415	3553
KICH	IL6	cg13104385_IL6	-0.387304	0.00131477	3569
KICH	NLRC4	cg22805603_NLRC4	-0.330007	0.00704809	58484
KICH	NLRP1	cg07442907_NLRP1	-0.595324	2.54328e-07	22861
KICH	NLRP2	cg25651476_NLRP2	-0.725449	5.59266e-12	55655
KICH	NLRP3	cg21991396_NLRP3	-0.55441	2.10098e-06	114548
KICH	NLRP6	cg09205751_NLRP6	-0.227607	0.0660678	171389
KICH	NLRP7	cg13650654_NLRP7	-0.173307	0.164041	199713
KICH	NOD1	cg09579281_NOD1	-0.338441	0.00566249	10392
KICH	NOD2	cg06181567_NOD2	-0.427116	0.000393714	64127
KICH	PJVK	cg15658577_DFNB59	-0.205594	0.0976899	494513
KICH	PLCG1	cg04964562_PLCG1	-0.282413	0.0219008	5335
KICH	PRKACA	cg01010868_PRKACA	-0.30763	0.0122666	5566
KICH	PYCARD	cg12100791_PYCARD	-0.616032	7.85706e-08	29108
KICH	TIRAP	cg10291648_TIRAP	-0.25202	0.0414792	114609
KICH	TNF	cg10650821_TNF	-0.471975	6.3158e-05	7124
KIRC	AIM2	cg00490406_AIM2	-0.702187	0	9447
KIRC	CASP1	cg21002651_CASP1	-0.268565	1.29045e-06	834
KIRC	CASP3	cg13339708_CASP3	-0.083217	0.138629	836
KIRC	CASP4	cg08469834_CASP4	-0.21163	0.000148259	837
KIRC	CASP5	cg10825847_CASP5	-0.278179	4.63227e-07	838
KIRC	CASP6	cg05295810_CASP6	-0.0996916	0.0758785	839
KIRC	CASP8	cg04286206_CASP8	-0.174515	0.00180984	841
KIRC	CASP9	cg02612026_CASP9	-0.0769552	0.17093	842
KIRC	ELANE	cg07239938_ELANE	-0.174765	0.0017579	1991
KIRC	GPX4	cg14894245_GPX4	-0.265663	1.6897e-06	2879
KIRC	GSDMA	cg24910161_GSDMA	-0.0474221	0.399339	284110
KIRC	GSDMB	cg16822095_GSDMB	-0.270503	1.07607e-06	55876
KIRC	GSDMC	cg23990303_GSDMC	-0.0325988	0.562465	56169
KIRC	GSDMD	cg10675725_GSDMD	-0.249429	7.21579e-06	79792
KIRC	GSDME	cg17569154_DFNA5	-0.371544	1.0551e-11	1687
KIRC	IL18	cg26534425_IL18	-0.360647	4.56626e-11	3606
KIRC	IL1B	cg01290568_IL1B	-0.340728	4.38089e-10	3553
KIRC	IL6	cg02335517_IL6	-0.193279	0.000540356	3569
KIRC	NLRC4	cg22713339_NLRC4	0.0387225	0.491415	58484
KIRC	NLRP1	cg19972788_NLRP1	-0.150002	0.007419	22861
KIRC	NLRP2	cg24040502_NLRP2	-0.603002	0	55655
KIRC	NLRP3	cg21991396_NLRP3	-0.242383	1.316e-05	114548
KIRC	NLRP6	cg03009397_NLRP6	-0.54938	1.80199e-26	171389
KIRC	NLRP7	cg14928510_NLRP7	-0.277338	5.03209e-07	199713
KIRC	NOD1	cg09579281_NOD1	-0.219084	8.4909e-05	10392
KIRC	NOD2	cg04172533_NOD2	-0.566539	0	64127
KIRC	PJVK	cg03724445_DFNB59	-0.264656	1.85393e-06	494513
KIRC	PLCG1	cg06457011_PLCG1	-0.199818	0.000345206	5335
KIRC	PRKACA	cg19621460_PRKACA	-0.106328	0.0582539	5566
KIRC	PYCARD	cg05214748_PYCARD	-0.471752	0	29108
KIRC	TIRAP	cg02973469_TIRAP	-0.172381	0.00203545	114609
KIRC	TNF	cg09637172_TNF	-0.220753	7.1818e-05	7124
KIRP	AIM2	cg00490406_AIM2	-0.594196	1.52815e-27	9447
KIRP	CASP1	cg13802966_CASP1	-0.53812	0	834
KIRP	CASP3	cg13111919_CASP3	-0.0717283	0.236484	836
KIRP	CASP4	cg16669455_CASP4	-0.242768	5.1415e-05	837
KIRP	CASP5	cg10825847_CASP5	-0.32655	3.14657e-08	838
KIRP	CASP6	cg08152567_CASP6	-0.0898555	0.137855	839
KIRP	CASP8	cg14962032_CASP8	-0.137356	0.0230303	841
KIRP	CASP9	cg12138346_CASP9	-0.245096	4.335e-05	842
KIRP	ELANE	cg08269974_ELANE	-0.0906653	0.134393	1991
KIRP	GPX4	cg19512730_GPX4	-0.157873	0.00890941	2879
KIRP	GSDMA	cg24910161_GSDMA	-0.188258	0.00174797	284110
KIRP	GSDMB	cg03190929_GSDMB	-0.24049	6.0662e-05	55876
KIRP	GSDMC	cg05316065_GSDMC	-0.33332	1.56093e-08	56169
KIRP	GSDMD	cg10675725_GSDMD	-0.33258	2.06102e-08	79792
KIRP	GSDME	cg17569154_DFNA5	-0.367644	4.58831e-10	1687
KIRP	IL18	cg04100971_IL18	0.00330968	0.956484	3606
KIRP	IL1B	cg01290568_IL1B	-0.522144	0	3553
KIRP	IL6	cg13104385_IL6	-0.539698	4.10598e-22	3569
KIRP	NLRC4	cg07055315_NLRC4	-0.214698	0.000354617	58484
KIRP	NLRP1	cg09205190_NLRP1	-0.138168	0.0222275	22861
KIRP	NLRP2	cg24040502_NLRP2	-0.845105	6.03245e-76	55655
KIRP	NLRP3	cg21991396_NLRP3	-0.575311	0	114548
KIRP	NLRP6	cg11717054_NLRP6	-0.451942	3.37829e-15	171389
KIRP	NLRP7	cg08211199_NLRP7	-0.110544	0.0676891	199713
KIRP	NOD1	cg04071779_NOD1	-0.243389	4.9136e-05	10392
KIRP	NOD2	cg04172533_NOD2	-0.586363	0	64127
KIRP	PJVK	cg15658577_DFNB59	-0.228654	0.000139752	494513
KIRP	PLCG1	cg07893801_PLCG1	-0.387851	4.04271e-11	5335
KIRP	PRKACA	cg19621460_PRKACA	-0.236089	8.3139e-05	5566
KIRP	PYCARD	cg05907835_PYCARD	-0.553617	0	29108
KIRP	TIRAP	cg15699874_TIRAP	-0.220256	0.000246404	114609
KIRP	TNF	cg21467614_TNF	-0.594359	1.46663e-27	7124
LAML	AIM2	cg11003133_AIM2	-0.502448	0	9447
LAML	CASP1	cg13802966_CASP1	-0.226358	0.0030566	834
LAML	CASP3	cg19035151_CASP3	-0.14276	0.0633374	836
LAML	CASP4	cg15665081_CASP4	-0.0270675	0.725796	837
LAML	CASP5	cg10825847_CASP5	-0.233944	0.00213722	838
LAML	CASP6	cg22216491_CASP6	-0.0885449	0.250601	839
LAML	CASP8	cg20608990_CASP8	-0.0733569	0.341414	841
LAML	CASP9	cg19267254_CASP9	-0.159692	0.0376081	842
LAML	ELANE	cg04382396_ELANE	-0.54149	0	1991
LAML	GPX4	cg14894245_GPX4	-0.26734	0.000443872	2879
LAML	GSDMA	cg26162295_GSDMA	-0.234012	0.00213067	284110
LAML	GSDMB	cg23047335_GSDMB	-0.174087	0.0232913	55876
LAML	GSDMC	cg05316065_GSDMC	-0.0681564	0.377171	56169
LAML	GSDMD	cg17812120_GSDMD	-0.187401	0.0144008	79792
LAML	GSDME	cg03995857_DFNA5	-0.425771	7.11097e-09	1687
LAML	IL18	cg04100971_IL18	-0.0954305	0.215519	3606
LAML	IL1B	cg15836722_IL1B	-0.435719	4.17168e-09	3553
LAML	IL6	cg05265849_IL6	-0.00983655	0.898695	3569
LAML	NLRC4	cg07055315_NLRC4	-0.515035	0	58484
LAML	NLRP1	cg19972788_NLRP1	0.0924262	0.230368	22861
LAML	NLRP2	cg25651476_NLRP2	-0.776707	1.47877e-35	55655
LAML	NLRP3	cg21991396_NLRP3	-0.606759	0	114548
LAML	NLRP6	cg06328831_NLRP6	-0.234126	0.00211969	171389
LAML	NLRP7	cg01628819_NLRP7	-0.251614	0.000933431	199713
LAML	NOD1	cg07277549_NOD1	-0.306927	5.0874e-05	10392
LAML	NOD2	cg26954174_NOD2	-0.500819	0	64127
LAML	PJVK	cg15658577_DFNB59	-0.073352	0.341446	494513
LAML	PLCG1	cg06493829_PLCG1	-0.527687	0	5335
LAML	PRKACA	cg22857947_PRKACA	-0.264555	0.000489836	5566
LAML	PYCARD	cg01059100_PYCARD	-0.5015	0	29108
LAML	TIRAP	cg14755009_TIRAP	-0.12374	0.107867	114609
LAML	TNF	cg04472685_TNF	0.0419674	0.586861	7124
LGG	AIM2	cg00490406_AIM2	-0.125276	0.00437125	9447
LGG	CASP1	cg21002651_CASP1	-0.514617	0	834
LGG	CASP3	cg07234880_CASP3	-0.128083	0.00358462	836
LGG	CASP4	cg08469834_CASP4	-0.530478	8.62262e-39	837
LGG	CASP5	cg10825847_CASP5	-0.229184	1.41228e-07	838
LGG	CASP6	cg01219048_CASP6	-0.553256	1.03748e-42	839
LGG	CASP8	cg01466121_CASP8	0.0624597	0.156507	841
LGG	CASP9	cg21449655_CASP9	-0.168224	0.000125973	842
LGG	ELANE	cg15530560_ELANE	-0.0951698	0.0306562	1991
LGG	GPX4	cg04903600_GPX4	-0.135144	0.00211048	2879
LGG	GSDMA	cg21790570_GSDMA	-0.146852	0.000820131	284110
LGG	GSDMB	cg03190929_GSDMB	-0.221789	3.85567e-07	55876
LGG	GSDMC	cg26073844_GSDMC	-0.0894312	0.0422924	56169
LGG	GSDMD	cg23101464_GSDMD	-0.54172	0	79792
LGG	GSDME	cg06301139_DFNA5	-0.0697984	0.113264	1687
LGG	IL18	cg09122223_IL18	-0.295665	9.07566e-12	3606
LGG	IL1B	cg01290568_IL1B	-0.267634	7.60005e-10	3553
LGG	IL6	cg13104385_IL6	-0.389898	3.514e-20	3569
LGG	NLRC4	cg07055315_NLRC4	-0.105778	0.0162631	58484
LGG	NLRP1	cg00268086_NLRP1	-0.451295	0	22861
LGG	NLRP2	cg24040502_NLRP2	-0.591609	4.9123e-50	55655
LGG	NLRP3	cg26112639_NLRP3	-0.519699	0	114548
LGG	NLRP6	cg11717054_NLRP6	-0.129464	0.00321776	171389
LGG	NLRP7	cg14928510_NLRP7	-0.112294	0.0106886	199713
LGG	NOD1	cg07277549_NOD1	-0.490722	0	10392
LGG	NOD2	cg04172533_NOD2	-0.286184	4.28799e-11	64127
LGG	PJVK	cg09890200_DFNB59	-0.168283	0.000125281	494513
LGG	PLCG1	cg07893801_PLCG1	-0.322061	8.67104e-14	5335
LGG	PRKACA	cg09906922_PRKACA	-0.50699	0	5566
LGG	PYCARD	cg27615603_PYCARD	-0.515462	0	29108
LGG	TIRAP	cg16337273_TIRAP	-0.120305	0.00624424	114609
LGG	TNF	cg23384708_TNF	-0.026197	0.552565	7124
LIHC	AIM2	cg00490406_AIM2	-0.323492	1.74462e-10	9447
LIHC	CASP1	cg21002651_CASP1	-0.476924	0	834
LIHC	CASP3	cg07234880_CASP3	-0.257655	5.35074e-07	836
LIHC	CASP4	cg08469834_CASP4	-0.204985	7.2161e-05	837
LIHC	CASP5	cg11905407_CASP5	0.00176196	0.973018	838
LIHC	CASP6	cg27274728_CASP6	-0.159847	0.00201263	839
LIHC	CASP8	cg13109397_CASP8	-0.176675	0.000641057	841
LIHC	CASP9	cg16706559_CASP9	-0.39292	2.79879e-15	842
LIHC	ELANE	cg08269974_ELANE	-0.0806731	0.120864	1991
LIHC	GPX4	cg24783234_GPX4	-0.242276	2.51732e-06	2879
LIHC	GSDMA	cg24910161_GSDMA	-0.0985838	0.0578183	284110
LIHC	GSDMB	cg16822095_GSDMB	-0.339498	2.45967e-11	55876
LIHC	GSDMC	cg23990303_GSDMC	-0.0350095	0.501418	56169
LIHC	GSDMD	cg10074813_GSDMD	-0.367251	3.72848e-13	79792
LIHC	GSDME	cg03995857_DFNA5	-0.524013	0	1687
LIHC	IL18	cg26534425_IL18	-0.561853	0	3606
LIHC	IL1B	cg01290568_IL1B	-0.573542	7.82328e-34	3553
LIHC	IL6	cg07998387_IL6	0.10508	0.0430991	3569
LIHC	NLRC4	cg22805603_NLRC4	0.0101813	0.84497	58484
LIHC	NLRP1	cg26561413_NLRP1	-0.146846	0.00462645	22861
LIHC	NLRP2	cg24040502_NLRP2	-0.398809	1.35402e-15	55655
LIHC	NLRP3	cg03505654_NLRP3	0.136761	0.00834638	114548
LIHC	NLRP6	cg15451020_NLRP6	-0.209819	4.6371e-05	171389
LIHC	NLRP7	cg14928510_NLRP7	-0.0795274	0.12625	199713
LIHC	NOD1	cg19071544_NOD1	-0.40176	0	10392
LIHC	NOD2	cg26954174_NOD2	-0.470775	7.33171e-22	64127
LIHC	PJVK	cg03724445_DFNB59	-0.0662597	0.202896	494513
LIHC	PLCG1	cg06493829_PLCG1	-0.527426	0	5335
LIHC	PRKACA	cg01596520_PRKACA	-0.324708	1.8883e-10	5566
LIHC	PYCARD	cg05907835_PYCARD	-0.637887	0	29108
LIHC	TIRAP	cg15573846_TIRAP	-0.205506	6.9118e-05	114609
LIHC	TNF	cg21370522_TNF	-0.409188	2.07854e-16	7124
LUAD	AIM2	cg00490406_AIM2	-0.65554	0	9447
LUAD	CASP1	cg21002651_CASP1	-0.524534	0	834
LUAD	CASP3	cg20176042_CASP3	-0.171024	0.000256203	836
LUAD	CASP4	cg08469834_CASP4	-0.140386	0.00274026	837
LUAD	CASP5	cg10825847_CASP5	-0.196006	2.6027e-05	838
LUAD	CASP6	cg05855157_CASP6	-0.0787206	0.0938683	839
LUAD	CASP8	cg26799474_CASP8	-0.234414	4.73818e-07	841
LUAD	CASP9	cg24483825_CASP9	-0.13744	0.0033664	842
LUAD	ELANE	cg26717554_ELANE	-0.0555233	0.237722	1991
LUAD	GPX4	cg14894245_GPX4	-0.162674	0.000509715	2879
LUAD	GSDMA	cg24910161_GSDMA	-0.194577	2.9871e-05	284110
LUAD	GSDMB	cg16822095_GSDMB	-0.357643	4.73047e-15	55876
LUAD	GSDMC	cg05316065_GSDMC	-0.120362	0.0102992	56169
LUAD	GSDMD	cg06043315_GSDMD	-0.280921	1.31578e-09	79792
LUAD	GSDME	cg04770504_DFNA5	-0.357972	4.42584e-15	1687
LUAD	IL18	cg04100971_IL18	0.283742	8.87644e-10	3606
LUAD	IL1B	cg15836722_IL1B	-0.420592	0	3553
LUAD	IL6	cg15703690_IL6	0.0677574	0.149422	3569
LUAD	NLRC4	cg07055315_NLRC4	0.0100389	0.831015	58484
LUAD	NLRP1	cg14649267_NLRP1	0.269574	6.13913e-09	22861
LUAD	NLRP2	cg24040502_NLRP2	-0.781162	0	55655
LUAD	NLRP3	cg03505654_NLRP3	-0.0272633	0.56231	114548
LUAD	NLRP6	cg02471658_NLRP6	-0.0178406	0.7046	171389
LUAD	NLRP7	cg14928510_NLRP7	-0.0638751	0.174261	199713
LUAD	NOD1	cg09579281_NOD1	-0.600437	0	10392
LUAD	NOD2	cg04172533_NOD2	-0.323953	1.98442e-12	64127
LUAD	PJVK	cg25102782_DFNB59	-0.150767	0.00127294	494513
LUAD	PLCG1	cg07893801_PLCG1	-0.300409	7.93152e-11	5335
LUAD	PRKACA	cg12116020_PRKACA	-0.183811	8.3959e-05	5566
LUAD	PYCARD	cg05907835_PYCARD	-0.49182	0	29108
LUAD	TIRAP	cg15932284_TIRAP	-0.279661	1.32951e-09	114609
LUAD	TNF	cg02137984_TNF	-0.342966	7.62287e-14	7124
LUSC	AIM2	cg00490406_AIM2	-0.741259	0	9447
LUSC	CASP1	cg21002651_CASP1	-0.264385	2.63422e-07	834
LUSC	CASP3	cg16792066_CASP3	-0.245097	1.90876e-06	836
LUSC	CASP4	cg08469834_CASP4	-0.351243	4.46667e-12	837
LUSC	CASP5	cg10825847_CASP5	0.0358434	0.491274	838
LUSC	CASP6	cg05295810_CASP6	-0.185456	0.000336397	839
LUSC	CASP8	cg26799474_CASP8	-0.310802	9.44867e-10	841
LUSC	CASP9	cg24483825_CASP9	-0.398848	3.51711e-16	842
LUSC	ELANE	cg08269974_ELANE	-0.0855203	0.100033	1991
LUSC	GPX4	cg25540845_GPX4	-0.24871	1.33284e-06	2879
LUSC	GSDMA	cg24092444_GSDMA	0.0170301	0.743714	284110
LUSC	GSDMB	cg16822095_GSDMB	-0.305517	2.26115e-09	55876
LUSC	GSDMC	cg26073844_GSDMC	-0.0770803	0.138326	56169
LUSC	GSDMD	cg23101464_GSDMD	-0.402224	0	79792
LUSC	GSDME	cg09333471_DFNA5	-0.232848	6.19835e-06	1687
LUSC	IL18	cg04100971_IL18	0.183028	0.00040323	3606
LUSC	IL1B	cg01290568_IL1B	-0.314445	7.28116e-10	3553
LUSC	IL6	cg15703690_IL6	-0.096151	0.0643277	3569
LUSC	NLRC4	cg22713339_NLRC4	0.0603701	0.245946	58484
LUSC	NLRP1	cg14649267_NLRP1	0.254027	7.77869e-07	22861
LUSC	NLRP2	cg24040502_NLRP2	-0.769847	0	55655
LUSC	NLRP3	cg03505654_NLRP3	0.0262001	0.614785	114548
LUSC	NLRP6	cg06432119_NLRP6	0.0411234	0.429672	171389
LUSC	NLRP7	cg14928510_NLRP7	0.00700731	0.892994	199713
LUSC	NOD1	cg05798501_NOD1	-0.341571	1.83109e-11	10392
LUSC	NOD2	cg06181567_NOD2	-0.2127	3.7714e-05	64127
LUSC	PJVK	cg15658577_DFNB59	-0.0514146	0.323178	494513
LUSC	PLCG1	cg06457011_PLCG1	-0.363656	6.63927e-13	5335
LUSC	PRKACA	cg15814923_PRKACA	-0.352139	3.90755e-12	5566
LUSC	PYCARD	cg05214748_PYCARD	-0.436185	0	29108
LUSC	TIRAP	cg10291648_TIRAP	-0.25887	4.71501e-07	114609
LUSC	TNF	cg01360627_TNF	-0.291382	1.26192e-08	7124
MESO	AIM2	cg11003133_AIM2	-0.649522	0	9447
MESO	CASP1	cg21002651_CASP1	-0.160421	0.137548	834
MESO	CASP3	cg07234880_CASP3	-0.395385	0.00016962	836
MESO	CASP4	cg16669455_CASP4	-0.200153	0.0631754	837
MESO	CASP5	cg10825847_CASP5	-0.236243	0.027599	838
MESO	CASP6	cg27274728_CASP6	-0.18468	0.0868371	839
MESO	CASP8	cg01466121_CASP8	0.128071	0.236656	841
MESO	CASP9	cg02612026_CASP9	-0.286324	0.00735647	842
MESO	ELANE	cg03526702_ELANE	-0.165494	0.125551	1991
MESO	GPX4	cg27106726_GPX4	-0.424619	4.8988e-05	2879
MESO	GSDMA	cg21790570_GSDMA	-0.204837	0.0571525	284110
MESO	GSDMB	cg16822095_GSDMB	-0.220566	0.0402762	55876
MESO	GSDMC	cg05316065_GSDMC	-0.443654	1.6781e-05	56169
MESO	GSDMD	cg09317036_GSDMD	-0.180415	0.0944705	79792
MESO	GSDME	cg22804000_DFNA5	-0.534483	1.58008e-07	1687
MESO	IL18	cg26534425_IL18	-0.493475	1.66943e-06	3606
MESO	IL1B	cg15836722_IL1B	-0.286761	0.00726397	3553
MESO	IL6	cg05265849_IL6	-0.337264	0.00148253	3569
MESO	NLRC4	cg21028608_NLRC4	-0.091711	0.397493	58484
MESO	NLRP1	cg14649267_NLRP1	0.146515	0.175373	22861
MESO	NLRP2	cg24040502_NLRP2	-0.886364	0	55655
MESO	NLRP3	cg07313373_NLRP3	-0.232048	0.0307808	114548
MESO	NLRP6	cg15451020_NLRP6	-0.22876	0.0330715	171389
MESO	NLRP7	cg08728865_NLRP7	-0.0796561	0.463313	199713
MESO	NOD1	cg09579281_NOD1	-0.271233	0.0112561	10392
MESO	NOD2	cg04172533_NOD2	-0.559835	3.08494e-08	64127
MESO	PJVK	cg23246789_DFNB59	-0.0390756	0.718857	494513
MESO	PLCG1	cg07893801_PLCG1	-0.378545	0.000330805	5335
MESO	PRKACA	cg15814923_PRKACA	-0.258493	0.0158521	5566
MESO	PYCARD	cg09866102_PYCARD	-0.417785	6.6128e-05	29108
MESO	TIRAP	cg26202340_TIRAP	-0.342877	0.00122239	114609
MESO	TNF	cg26729380_TNF	-0.396242	0.000163805	7124
OV	AIM2	cg27296413_AIM2	-0.510465	0.160267	9447
OV	CASP1	cg13802966_CASP1	-0.05	0.911618	834
OV	CASP3	cg16792066_CASP3	-0.666667	0.05889	836
OV	CASP4	cg16669455_CASP4	-0.783333	0.0172233	837
OV	CASP5	cg10825847_CASP5	-0.516667	0.1618	838
OV	CASP6	cg27274728_CASP6	-0.8	0.0138283	839
OV	CASP8	cg25748441_CASP8	-0.6	0.0967978	841
OV	CASP9	cg21858823_CASP9	-0.666667	0.05889	842
OV	ELANE	cg07239938_ELANE	-0.136931	0.725369	1991
OV	GPX4	cg13612480_GPX4	-0.583333	0.107997	2879
OV	GSDMA	cg21790570_GSDMA	-0.116667	0.775628	284110
OV	GSDMB	cg13212159_GSDMB	-0.566667	0.120574	55876
OV	GSDMC	cg26073844_GSDMC	-0.4	0.291193	56169
OV	GSDMD	cg18198896_GSDMD	-0.85	0.00607363	79792
OV	GSDME	cg04770504_DFNA5	-0.133333	0.743541	1687
OV	IL18	cg26534425_IL18	-0.716667	0.0368662	3606
OV	IL1B	cg01290568_IL1B	-0.533333	0.147525	3553
OV	IL6	cg01770232_IL6	0.0666667	0.880093	3569
OV	NLRC4	cg07055315_NLRC4	-0.333333	0.385323	58484
OV	NLRP1	cg09205190_NLRP1	0.583333	0.107997	22861
OV	NLRP2	cg24040502_NLRP2	-0.65	0.0665619	55655
OV	NLRP3	cg09226051_NLRP3	-0.383333	0.3125	114548
OV	NLRP6	cg10330545_NLRP6	-0.3	0.436624	171389
OV	NLRP7	cg18778097_NLRP7	-0.45	0.229817	199713
OV	NOD1	cg07277549_NOD1	-0.816667	0.0107694	10392
OV	NOD2	cg00641052_NOD2	-0.866667	0.00450838	64127
OV	PJVK	cg03724445_DFNB59	-0.266667	0.493331	494513
OV	PLCG1	cg07893801_PLCG1	-0.833333	0.0082672	5335
OV	PRKACA	cg20110535_PRKACA	-0.933333	0.000749559	5566
OV	PYCARD	cg11970458_PYCARD	-0.15	0.708069	29108
OV	TIRAP	cg15932284_TIRAP	-0.616667	0.0857253	114609
OV	TNF	cg02137984_TNF	-0.883333	0.0030754	7124
PAAD	AIM2	cg00490406_AIM2	-0.525191	5.22725e-14	9447
PAAD	CASP1	cg21002651_CASP1	-0.200114	0.00748803	834
PAAD	CASP3	cg07234880_CASP3	-0.286614	0.000112045	836
PAAD	CASP4	cg16669455_CASP4	-0.221307	0.00304878	837
PAAD	CASP5	cg10825847_CASP5	-0.0953889	0.205309	838
PAAD	CASP6	cg03797115_CASP6	-0.387115	1.19941e-07	839
PAAD	CASP8	cg14962032_CASP8	-0.260808	0.000456659	841
PAAD	CASP9	cg16706559_CASP9	-0.227542	0.00230417	842
PAAD	ELANE	cg26717554_ELANE	-0.22033	0.00312407	1991
PAAD	GPX4	cg11784697_GPX4	-0.363407	7.42519e-07	2879
PAAD	GSDMA	cg24910161_GSDMA	-0.17594	0.0188162	284110
PAAD	GSDMB	cg10057218_GSDMB	-0.686157	0	55876
PAAD	GSDMC	cg05316065_GSDMC	-0.258074	0.000505203	56169
PAAD	GSDMD	cg06043315_GSDMD	-0.496334	0	79792
PAAD	GSDME	cg19706795_DFNA5	-0.494609	0	1687
PAAD	IL18	cg04100971_IL18	0.102373	0.173741	3606
PAAD	IL1B	cg01290568_IL1B	-0.353185	1.56278e-06	3553
PAAD	IL6	cg05265849_IL6	-0.391554	8.39356e-08	3569
PAAD	NLRC4	cg22805603_NLRC4	-0.254854	0.000619724	58484
PAAD	NLRP1	cg26561413_NLRP1	-0.56765	0	22861
PAAD	NLRP2	cg24040502_NLRP2	-0.732058	3.74145e-31	55655
PAAD	NLRP3	cg26112639_NLRP3	-0.320189	1.4659e-05	114548
PAAD	NLRP6	cg06432119_NLRP6	-0.393822	5.36916e-08	171389
PAAD	NLRP7	cg14928510_NLRP7	-0.0607076	0.420833	199713
PAAD	NOD1	cg19071544_NOD1	-0.473056	3.15254e-11	10392
PAAD	NOD2	cg01020263_NOD2	-0.291968	8.2309e-05	64127
PAAD	PJVK	cg03724445_DFNB59	-0.13779	0.0666305	494513
PAAD	PLCG1	cg06457011_PLCG1	-0.468385	5.72419e-11	5335
PAAD	PRKACA	cg26670249_PRKACA	-0.342342	3.35103e-06	5566
PAAD	PYCARD	cg09055507_PYCARD	-0.447814	5.44583e-10	29108
PAAD	TIRAP	cg15699874_TIRAP	-0.230431	0.00201876	114609
PAAD	TNF	cg01360627_TNF	-0.367388	5.51979e-07	7124
PCPG	AIM2	cg00490406_AIM2	-0.21992	0.00309621	9447
PCPG	CASP1	cg21002651_CASP1	-0.471866	3.18468e-11	834
PCPG	CASP3	cg19035151_CASP3	-0.185977	0.0127821	836
PCPG	CASP4	cg16669455_CASP4	-0.217381	0.00352869	837
PCPG	CASP5	cg14758526_CASP5	0.00744181	0.921243	838
PCPG	CASP6	cg03797115_CASP6	-0.145436	0.0521432	839
PCPG	CASP8	cg01466121_CASP8	0.471941	3.15293e-11	841
PCPG	CASP9	cg24483825_CASP9	-0.52624	0	842
PCPG	ELANE	cg04382396_ELANE	-0.0715789	0.341009	1991
PCPG	GPX4	cg14894245_GPX4	-0.245574	0.000951607	2879
PCPG	GSDMA	cg08995595_GSDMA	0.00914419	0.903306	284110
PCPG	GSDMB	cg21300187_GSDMB	-0.113086	0.131666	55876
PCPG	GSDMC	cg05316065_GSDMC	0.00734767	0.922236	56169
PCPG	GSDMD	cg06043315_GSDMD	-0.302088	4.3003e-05	79792
PCPG	GSDME	cg24805239_DFNA5	-0.312355	2.2822e-05	1687
PCPG	IL18	cg11304234_IL18	-0.0379491	0.613696	3606
PCPG	IL1B	cg15836722_IL1B	-0.185795	0.0128712	3553
PCPG	IL6	cg00087425_IL6	-0.112401	0.134122	3569
PCPG	NLRC4	cg22805603_NLRC4	0.0100873	0.893293	58484
PCPG	NLRP1	cg14649267_NLRP1	0.0559894	0.456256	22861
PCPG	NLRP2	cg24040502_NLRP2	-0.425995	2.76111e-09	55655
PCPG	NLRP3	cg03505654_NLRP3	0.059651	0.427304	114548
PCPG	NLRP6	cg06328831_NLRP6	-0.208576	0.00508051	171389
PCPG	NLRP7	cg14928510_NLRP7	0.00529708	0.943896	199713
PCPG	NOD1	cg06557644_NOD1	-0.368364	4.76242e-07	10392
PCPG	NOD2	cg01020263_NOD2	-0.259496	0.000470947	64127
PCPG	PJVK	cg23246789_DFNB59	-0.120143	0.109121	494513
PCPG	PLCG1	cg18350866_PLCG1	-0.0943423	0.208842	5335
PCPG	PRKACA	cg22857947_PRKACA	-0.398864	4.22335e-08	5566
PCPG	PYCARD	cg01059100_PYCARD	-0.345513	2.51864e-06	29108
PCPG	TIRAP	cg10291648_TIRAP	-0.325089	1.0077e-05	114609
PCPG	TNF	cg21370522_TNF	-0.209303	0.00492525	7124
PRAD	AIM2	cg00490406_AIM2	-0.164219	0.000236198	9447
PRAD	CASP1	cg21002651_CASP1	-0.164145	0.000237743	834
PRAD	CASP3	cg11691938_CASP3	-0.0947498	0.0347414	836
PRAD	CASP4	cg08469834_CASP4	-0.0947815	0.0346807	837
PRAD	CASP5	cg14758526_CASP5	0.0487143	0.278399	838
PRAD	CASP6	cg01219048_CASP6	-0.172486	0.000113825	839
PRAD	CASP8	cg01466121_CASP8	0.0912742	0.0419859	841
PRAD	CASP9	cg25154447_CASP9	-0.0577271	0.198872	842
PRAD	ELANE	cg21586152_ELANE	-0.24329	3.95473e-08	1991
PRAD	GPX4	cg00502555_GPX4	-0.32468	1.55405e-13	2879
PRAD	GSDMA	cg26162295_GSDMA	-0.194326	1.2831e-05	284110
PRAD	GSDMB	cg03190929_GSDMB	-0.266606	1.8062e-09	55876
PRAD	GSDMC	cg05316065_GSDMC	0.0632053	0.159449	56169
PRAD	GSDMD	cg23101464_GSDMD	-0.745441	0	79792
PRAD	GSDME	cg19706795_DFNA5	-0.588098	0	1687
PRAD	IL18	cg11304234_IL18	-0.440293	0	3606
PRAD	IL1B	cg01290568_IL1B	-0.360804	1.00072e-16	3553
PRAD	IL6	cg13104385_IL6	-0.0203122	0.651459	3569
PRAD	NLRC4	cg22805603_NLRC4	-0.111736	0.0126842	58484
PRAD	NLRP1	cg07442907_NLRP1	-0.630076	0	22861
PRAD	NLRP2	cg24040502_NLRP2	-0.900204	7.63738e-181	55655
PRAD	NLRP3	cg07313373_NLRP3	-0.206344	3.68793e-06	114548
PRAD	NLRP6	cg16359142_NLRP6	-0.0732873	0.102698	171389
PRAD	NLRP7	cg08211199_NLRP7	-0.0848368	0.0587639	199713
PRAD	NOD1	cg19071544_NOD1	-0.341243	5.09938e-15	10392
PRAD	NOD2	cg01243823_NOD2	-0.45935	0	64127
PRAD	PJVK	cg03724445_DFNB59	-0.220195	7.13928e-07	494513
PRAD	PLCG1	cg07893801_PLCG1	-0.549644	0	5335
PRAD	PRKACA	cg26670249_PRKACA	-0.198962	8.19519e-06	5566
PRAD	PYCARD	cg05214748_PYCARD	-0.587649	0	29108
PRAD	TIRAP	cg09036154_TIRAP	-0.0789145	0.0788169	114609
PRAD	TNF	cg21467614_TNF	-0.245239	3.05486e-08	7124
READ	AIM2	cg11003133_AIM2	-0.527981	1.03195e-07	9447
READ	CASP1	cg21002651_CASP1	-0.634265	0	834
READ	CASP3	cg23259381_CASP3	-0.372178	0.000285311	836
READ	CASP4	cg08469834_CASP4	-0.0192346	0.855367	837
READ	CASP5	cg10825847_CASP5	-0.38574	0.000163897	838
READ	CASP6	cg03797115_CASP6	-0.337068	0.00108143	839
READ	CASP8	cg23061725_CASP8	-0.210379	0.0442975	841
READ	CASP9	cg24483825_CASP9	-0.544164	3.55268e-08	842
READ	ELANE	cg21586152_ELANE	-0.196406	0.0605968	1991
READ	GPX4	cg27106726_GPX4	-0.119045	0.257864	2879
READ	GSDMA	cg24910161_GSDMA	-0.519628	1.74442e-07	284110
READ	GSDMB	cg10057218_GSDMB	-0.548695	2.59701e-08	55876
READ	GSDMC	cg23990303_GSDMC	0.100388	0.341029	56169
READ	GSDMD	cg15172061_GSDMD	-0.209408	0.0453039	79792
READ	GSDME	cg03995857_DFNA5	-0.334387	0.00119029	1687
READ	IL18	cg09122223_IL18	-0.2521	0.0155462	3606
READ	IL1B	cg14117934_IL1B	-0.408905	6.0256e-05	3553
READ	IL6	cg26061582_IL6	-0.194473	0.0633319	3569
READ	NLRC4	cg22805603_NLRC4	-0.141193	0.179127	58484
READ	NLRP1	cg00268086_NLRP1	-0.387605	0.000151597	22861
READ	NLRP2	cg24040502_NLRP2	-0.790876	6.74259e-21	55655
READ	NLRP3	cg26112639_NLRP3	-0.245349	0.0186213	114548
READ	NLRP6	cg02471658_NLRP6	-0.303197	0.0033046	171389
READ	NLRP7	cg01560554_NLRP7	-0.0548525	0.603535	199713
READ	NOD1	cg13015266_NOD1	-0.318281	0.00208212	10392
READ	NOD2	cg06181567_NOD2	-0.530925	8.54443e-08	64127
READ	PJVK	cg09890200_DFNB59	-0.129664	0.217572	494513
READ	PLCG1	cg07893801_PLCG1	-0.373226	0.000273569	5335
READ	PRKACA	cg04529602_PRKACA	-0.20856	0.0461981	5566
READ	PYCARD	cg05907835_PYCARD	-0.600558	0	29108
READ	TIRAP	cg15573846_TIRAP	-0.219133	0.0360367	114609
READ	TNF	cg17741993_TNF	-0.226253	0.0303114	7124
SARC	AIM2	cg00490406_AIM2	-0.741168	2.21852e-46	9447
SARC	CASP1	cg21002651_CASP1	-0.518471	0	834
SARC	CASP3	cg07234880_CASP3	-0.149587	0.0160532	836
SARC	CASP4	cg08469834_CASP4	-0.144545	0.020025	837
SARC	CASP5	cg10825847_CASP5	-0.165904	0.00745914	838
SARC	CASP6	cg05295810_CASP6	-0.26983	1.1501e-05	839
SARC	CASP8	cg14962032_CASP8	-0.139071	0.0252786	841
SARC	CASP9	cg21449655_CASP9	-0.497587	0	842
SARC	ELANE	cg15530560_ELANE	-0.10331	0.097112	1991
SARC	GPX4	cg14894245_GPX4	-0.330469	6.17607e-08	2879
SARC	GSDMA	cg24910161_GSDMA	-0.165859	0.00747546	284110
SARC	GSDMB	cg13212159_GSDMB	-0.0784219	0.208276	55876
SARC	GSDMC	cg05316065_GSDMC	-0.30344	6.43648e-07	56169
SARC	GSDMD	cg26711732_GSDMD	-0.211684	0.000621186	79792
SARC	GSDME	cg17569154_DFNA5	-0.490707	0	1687
SARC	IL18	cg26534425_IL18	-0.568426	0	3606
SARC	IL1B	cg23149881_IL1B	-0.324751	8.957e-08	3553
SARC	IL6	cg00087425_IL6	-0.0184334	0.767656	3569
SARC	NLRC4	cg22805603_NLRC4	-0.131428	0.034572	58484
SARC	NLRP1	cg07442907_NLRP1	-0.578395	0	22861
SARC	NLRP2	cg24040502_NLRP2	-0.425935	7.7316e-13	55655
SARC	NLRP3	cg21991396_NLRP3	-0.314471	2.7431e-07	114548
SARC	NLRP6	cg22331032_NLRP6	-0.0746636	0.231128	171389
SARC	NLRP7	cg14928510_NLRP7	-0.0344991	0.580476	199713
SARC	NOD1	cg16680624_NOD1	-0.455398	0	10392
SARC	NOD2	cg26954174_NOD2	-0.326776	8.77769e-08	64127
SARC	PJVK	cg23246789_DFNB59	-0.134397	0.0306645	494513
SARC	PLCG1	cg07893801_PLCG1	-0.412749	6.11518e-12	5335
SARC	PRKACA	cg26670249_PRKACA	-0.380069	3.46015e-10	5566
SARC	PYCARD	cg08730348_PYCARD	-0.259613	2.4858e-05	29108
SARC	TIRAP	cg15573846_TIRAP	-0.351418	7.70726e-09	114609
SARC	TNF	cg23384708_TNF	-0.273203	8.1704e-06	7124
SKCM	AIM2	cg00490406_AIM2	-0.80924	5.99196e-110	9447
SKCM	CASP1	cg13802966_CASP1	-0.489752	0	834
SKCM	CASP3	cg16792066_CASP3	-0.249914	4.59462e-08	836
SKCM	CASP4	cg08469834_CASP4	-0.452165	0	837
SKCM	CASP5	cg10825847_CASP5	-0.272706	1.92223e-09	838
SKCM	CASP6	cg01219048_CASP6	-0.263899	6.51276e-09	839
SKCM	CASP8	cg25073137_CASP8	-0.443219	0	841
SKCM	CASP9	cg25845331_CASP9	-0.368257	1.23868e-16	842
SKCM	ELANE	cg21586152_ELANE	-0.070801	0.125739	1991
SKCM	GPX4	cg24783234_GPX4	-0.163437	0.000385879	2879
SKCM	GSDMA	cg24910161_GSDMA	-0.0397752	0.390103	284110
SKCM	GSDMB	cg16822095_GSDMB	-0.103285	0.0253377	55876
SKCM	GSDMC	cg05316065_GSDMC	-0.221303	1.29859e-06	56169
SKCM	GSDMD	cg26711732_GSDMD	-0.478517	0	79792
SKCM	GSDME	cg01733570_DFNA5	-0.582376	0	1687
SKCM	IL18	cg26534425_IL18	-0.622117	0	3606
SKCM	IL1B	cg01290568_IL1B	-0.270649	2.56614e-09	3553
SKCM	IL6	cg02335517_IL6	-0.244345	8.37048e-08	3569
SKCM	NLRC4	cg07055315_NLRC4	-0.0586592	0.20478	58484
SKCM	NLRP1	cg19972788_NLRP1	0.1414	0.00216253	22861
SKCM	NLRP2	cg24040502_NLRP2	-0.325891	4.57696e-13	55655
SKCM	NLRP3	cg21919599_NLRP3	-0.106286	0.0213657	114548
SKCM	NLRP6	cg06432119_NLRP6	-0.261276	9.28733e-09	171389
SKCM	NLRP7	cg14928510_NLRP7	0.0986793	0.0326344	199713
SKCM	NOD1	cg09579281_NOD1	-0.17677	0.000121773	10392
SKCM	NOD2	cg16771652_NOD2	-0.542358	0	64127
SKCM	PJVK	cg23246789_DFNB59	-0.0872745	0.0589436	494513
SKCM	PLCG1	cg06457011_PLCG1	-0.478757	0	5335
SKCM	PRKACA	cg26613742_PRKACA	-0.150937	0.00105447	5566
SKCM	PYCARD	cg05907835_PYCARD	-0.569109	0	29108
SKCM	TIRAP	cg16337273_TIRAP	-0.298926	4.86019e-11	114609
SKCM	TNF	cg21467614_TNF	-0.459411	7.26757e-26	7124
STAD	AIM2	cg00490406_AIM2	-0.490484	0	9447
STAD	CASP1	cg21002651_CASP1	-0.58542	0	834
STAD	CASP3	cg20176042_CASP3	-0.204265	7.4882e-05	836
STAD	CASP4	cg08469834_CASP4	-0.192313	0.000195304	837
STAD	CASP5	cg10825847_CASP5	-0.364121	4.17867e-13	838
STAD	CASP6	cg10457397_CASP6	-0.116241	0.0250069	839
STAD	CASP8	cg00978584_CASP8	-0.327633	1.20214e-10	841
STAD	CASP9	cg26194092_CASP9	-0.167171	0.00121117	842
STAD	ELANE	cg08269974_ELANE	-0.225548	1.1216e-05	1991
STAD	GPX4	cg04903600_GPX4	-0.202429	8.4259e-05	2879
STAD	GSDMA	cg24910161_GSDMA	-0.156961	0.00239735	284110
STAD	GSDMB	cg12360886_GSDMB	-0.675366	0	55876
STAD	GSDMC	cg05316065_GSDMC	-0.117327	0.0236276	56169
STAD	GSDMD	cg06043315_GSDMD	-0.33306	4.35894e-11	79792
STAD	GSDME	cg03995857_DFNA5	-0.65015	0	1687
STAD	IL18	cg26534425_IL18	-0.220999	1.781e-05	3606
STAD	IL1B	cg15836722_IL1B	-0.286509	2.14024e-08	3553
STAD	IL6	cg05265849_IL6	-0.0194958	0.707816	3569
STAD	NLRC4	cg22805603_NLRC4	0.0477223	0.358692	58484
STAD	NLRP1	cg07442907_NLRP1	-0.211078	4.2289e-05	22861
STAD	NLRP2	cg24040502_NLRP2	-0.79339	8.91816e-82	55655
STAD	NLRP3	cg03505654_NLRP3	-0.152185	0.00328417	114548
STAD	NLRP6	cg11717054_NLRP6	-0.377059	5.16698e-14	171389
STAD	NLRP7	cg01879460_NLRP7	-0.148903	0.00399771	199713
STAD	NOD1	cg06151184_NOD1	-0.10338	0.0463469	10392
STAD	NOD2	cg01020263_NOD2	-0.126952	0.0143242	64127
STAD	PJVK	cg23246789_DFNB59	-0.185391	0.000324558	494513
STAD	PLCG1	cg06457011_PLCG1	-0.470741	0	5335
STAD	PRKACA	cg26613742_PRKACA	-0.0926622	0.0742663	5566
STAD	PYCARD	cg12100791_PYCARD	-0.316873	5.03779e-10	29108
STAD	TIRAP	cg09036154_TIRAP	-0.340502	2.00363e-11	114609
STAD	TNF	cg21370522_TNF	-0.218825	2.1599e-05	7124
TGCT	AIM2	cg00490406_AIM2	-0.611705	0	9447
TGCT	CASP1	cg21002651_CASP1	-0.505838	3.61183e-11	834
TGCT	CASP3	cg16792066_CASP3	-0.219567	0.00704116	836
TGCT	CASP4	cg16669455_CASP4	-0.634846	0	837
TGCT	CASP5	cg10825847_CASP5	-0.181045	0.0266133	838
TGCT	CASP6	cg22216491_CASP6	-0.139933	0.0876536	839
TGCT	CASP8	cg01466121_CASP8	-0.42747	6.66579e-08	841
TGCT	CASP9	cg24483825_CASP9	-0.4417	2.18583e-08	842
TGCT	ELANE	cg26717554_ELANE	0.310409	0.0001107	1991
TGCT	GPX4	cg25540845_GPX4	-0.190823	0.0194573	2879
TGCT	GSDMA	cg26162295_GSDMA	0.0711967	0.386609	284110
TGCT	GSDMB	cg05725940_GSDMB	-0.234508	0.00394955	55876
TGCT	GSDMC	cg26073844_GSDMC	0.282948	0.000450861	56169
TGCT	GSDMD	cg22687097_GSDMD	-0.0713934	0.384876	79792
TGCT	GSDME	cg00473134_DFNA5	-0.402711	4.12472e-07	1687
TGCT	IL18	cg26534425_IL18	-0.588753	0	3606
TGCT	IL1B	cg18773937_IL1B	-0.209803	0.0100846	3553
TGCT	IL6	cg02335517_IL6	-0.483099	5.71112e-10	3569
TGCT	NLRC4	cg22713339_NLRC4	-0.191827	0.0186916	58484
TGCT	NLRP1	cg09205190_NLRP1	0.235842	0.00374458	22861
TGCT	NLRP2	cg18059223_NLRP2	-0.605152	0	55655
TGCT	NLRP3	cg21919599_NLRP3	-0.130016	0.112728	114548
TGCT	NLRP6	cg11717054_NLRP6	-0.152394	0.062644	171389
TGCT	NLRP7	cg14876043_NLRP7	-0.652753	0	199713
TGCT	NOD1	cg04071779_NOD1	-0.50401	4.84553e-11	10392
TGCT	NOD2	cg01020263_NOD2	-0.436693	3.25551e-08	64127
TGCT	PJVK	cg23246789_DFNB59	-0.102922	0.209839	494513
TGCT	PLCG1	cg07893801_PLCG1	-0.484734	4.84451e-10	5335
TGCT	PRKACA	cg17119568_PRKACA	-0.267818	0.000957692	5566
TGCT	PYCARD	cg11970458_PYCARD	-0.488425	3.30582e-10	29108
TGCT	TIRAP	cg21533667_TIRAP	-0.455183	7.20888e-09	114609
TGCT	TNF	cg10717214_TNF	-0.43659	3.28209e-08	7124
THCA	AIM2	cg11003133_AIM2	-0.193642	1.1742e-05	9447
THCA	CASP1	cg13802966_CASP1	-0.62448	5.87307e-56	834
THCA	CASP3	cg16792066_CASP3	-0.0300744	0.499981	836
THCA	CASP4	cg16669455_CASP4	-0.782876	0	837
THCA	CASP5	cg10825847_CASP5	-0.0208269	0.640559	838
THCA	CASP6	cg06464025_CASP6	-0.0836712	0.0602733	839
THCA	CASP8	cg26799474_CASP8	-0.323558	1.21517e-13	841
THCA	CASP9	cg19602374_CASP9	-0.110244	0.0132152	842
THCA	ELANE	cg06100973_ELANE	-0.178657	5.4049e-05	1991
THCA	GPX4	cg14894245_GPX4	-0.355654	1.69019e-16	2879
THCA	GSDMA	cg24910161_GSDMA	-0.671052	2.30498e-67	284110
THCA	GSDMB	cg13212159_GSDMB	-0.0850556	0.0561383	55876
THCA	GSDMC	cg23990303_GSDMC	-0.18908	1.8929e-05	56169
THCA	GSDMD	cg10675725_GSDMD	-0.187714	2.2539e-05	79792
THCA	GSDME	cg25723149_DFNA5	-0.349396	7.20508e-16	1687
THCA	IL18	cg04929355_IL18	-0.467038	0	3606
THCA	IL1B	cg01290568_IL1B	-0.498666	0	3553
THCA	IL6	cg05265849_IL6	-0.242227	3.54425e-08	3569
THCA	NLRC4	cg22805603_NLRC4	-0.144131	0.00117467	58484
THCA	NLRP1	cg07442907_NLRP1	-0.685743	0	22861
THCA	NLRP2	cg24040502_NLRP2	-0.830746	4.56869e-130	55655
THCA	NLRP3	cg21991396_NLRP3	-0.410024	0	114548
THCA	NLRP6	cg22331032_NLRP6	-0.144789	0.00110287	171389
THCA	NLRP7	cg14928510_NLRP7	-0.164798	0.000199491	199713
THCA	NOD1	cg16680624_NOD1	-0.628674	6.62262e-57	10392
THCA	NOD2	cg04172533_NOD2	-0.713279	1.13684e-79	64127
THCA	PJVK	cg09890200_DFNB59	-0.210098	1.90814e-06	494513
THCA	PLCG1	cg07893801_PLCG1	-0.145666	0.0010388	5335
THCA	PRKACA	cg03856723_PRKACA	-0.352619	3.47997e-16	5566
THCA	PYCARD	cg05214748_PYCARD	-0.413617	0	29108
THCA	TIRAP	cg15699874_TIRAP	-0.091039	0.0408813	114609
THCA	TNF	cg21370522_TNF	-0.355987	1.55977e-16	7124
THYM	AIM2	cg00490406_AIM2	-0.443677	5.17844e-07	9447
THYM	CASP1	cg04181079_CASP1	-0.0950135	0.301495	834
THYM	CASP3	cg20811273_CASP3	-0.112966	0.218944	836
THYM	CASP4	cg16315582_CASP4	-0.364386	4.8339e-05	837
THYM	CASP5	cg10825847_CASP5	-0.390113	1.06e-05	838
THYM	CASP6	cg08152567_CASP6	-0.0656018	0.476006	839
THYM	CASP8	cg25748441_CASP8	-0.337482	0.00017808	841
THYM	CASP9	cg25845331_CASP9	-0.093312	0.310265	842
THYM	ELANE	cg08269974_ELANE	-0.0162715	0.859987	1991
THYM	GPX4	cg14894245_GPX4	-0.203743	0.0257723	2879
THYM	GSDMA	cg06532257_GSDMA	-0.147074	0.108939	284110
THYM	GSDMB	cg21499348_GSDMB	-0.0467046	0.612003	55876
THYM	GSDMC	cg05316065_GSDMC	-0.552202	6.23537e-11	56169
THYM	GSDMD	cg06043315_GSDMD	-0.215959	0.0179959	79792
THYM	GSDME	cg24805239_DFNA5	-0.452976	2.82316e-07	1687
THYM	IL18	cg04100971_IL18	-0.13535	0.140346	3606
THYM	IL1B	cg15836722_IL1B	-0.510001	4.31033e-09	3553
THYM	IL6	cg01770232_IL6	-0.0814862	0.376283	3569
THYM	NLRC4	cg07055315_NLRC4	-0.454233	2.59744e-07	58484
THYM	NLRP1	cg14649267_NLRP1	0.0364956	0.691904	22861
THYM	NLRP2	cg24040502_NLRP2	-0.849205	0	55655
THYM	NLRP3	cg18126557_NLRP3	-0.504	7.0506e-09	114548
THYM	NLRP6	cg02925222_NLRP6	-0.242024	0.00787166	171389
THYM	NLRP7	cg01879460_NLRP7	-0.045834	0.619124	199713
THYM	NOD1	cg04071779_NOD1	-0.461865	1.5551e-07	10392
THYM	NOD2	cg01243823_NOD2	-0.63816	4.51367e-15	64127
THYM	PJVK	cg15658577_DFNB59	-0.193145	0.0346947	494513
THYM	PLCG1	cg06457011_PLCG1	-0.601396	0	5335
THYM	PRKACA	cg26613742_PRKACA	-0.373088	3.0947e-05	5566
THYM	PYCARD	cg05214748_PYCARD	-0.245955	0.00689805	29108
THYM	TIRAP	cg15932284_TIRAP	-0.593256	0	114609
THYM	TNF	cg09637172_TNF	-0.36397	4.9367e-05	7124
UCEC	AIM2	cg00490406_AIM2	-0.331921	8.66258e-06	9447
UCEC	CASP1	cg21002651_CASP1	-0.513192	0	834
UCEC	CASP3	cg07234880_CASP3	-0.27211	0.000320267	836
UCEC	CASP4	cg08469834_CASP4	-0.354811	2.10293e-06	837
UCEC	CASP5	cg14758526_CASP5	-0.0776173	0.311516	838
UCEC	CASP6	cg27274728_CASP6	-0.206854	0.00656188	839
UCEC	CASP8	cg01466121_CASP8	0.132545	0.0830522	841
UCEC	CASP9	cg12138346_CASP9	-0.409643	3.24225e-08	842
UCEC	ELANE	cg21586152_ELANE	0.0322948	0.674074	1991
UCEC	GPX4	cg13612480_GPX4	-0.340074	5.72565e-06	2879
UCEC	GSDMA	cg24910161_GSDMA	-0.187848	0.0136003	284110
UCEC	GSDMB	cg16822095_GSDMB	-0.400205	7.01123e-08	55876
UCEC	GSDMC	cg26073844_GSDMC	-0.301819	5.729e-05	56169
UCEC	GSDMD	cg26711732_GSDMD	-0.221927	0.0034992	79792
UCEC	GSDME	cg09333471_DFNA5	-0.28673	0.000145863	1687
UCEC	IL18	cg04100971_IL18	0.075095	0.32721	3606
UCEC	IL1B	cg01290568_IL1B	-0.274747	0.000278773	3553
UCEC	IL6	cg05472934_IL6	0.0193103	0.801293	3569
UCEC	NLRC4	cg22805603_NLRC4	-0.0882052	0.249893	58484
UCEC	NLRP1	cg26561413_NLRP1	-0.34838	3.27515e-06	22861
UCEC	NLRP2	cg24040502_NLRP2	-0.783618	0	55655
UCEC	NLRP3	cg03505654_NLRP3	-0.148582	0.0518178	114548
UCEC	NLRP6	cg16359142_NLRP6	0.0474931	0.536131	171389
UCEC	NLRP7	cg18778097_NLRP7	0.0773969	0.312896	199713
UCEC	NOD1	cg06557644_NOD1	-0.228141	0.0026686	10392
UCEC	NOD2	cg16771652_NOD2	-0.380902	3.16286e-07	64127
UCEC	PJVK	cg23246789_DFNB59	-0.168894	0.0268795	494513
UCEC	PLCG1	cg07893801_PLCG1	-0.522752	0	5335
UCEC	PRKACA	cg26670249_PRKACA	-0.249623	0.000990806	5566
UCEC	PYCARD	cg05907835_PYCARD	-0.462185	2.55829e-10	29108
UCEC	TIRAP	cg16337273_TIRAP	-0.295687	8.8229e-05	114609
UCEC	TNF	cg20477259_TNF	0.108393	0.156824	7124
UCS	AIM2	cg00490406_AIM2	-0.0960931	0.477046	9447
UCS	CASP1	cg21002651_CASP1	-0.539344	2.048e-05	834
UCS	CASP3	cg16792066_CASP3	-0.36343	0.0057137	836
UCS	CASP4	cg08469834_CASP4	-0.327068	0.0133601	837
UCS	CASP5	cg14758526_CASP5	-0.0226784	0.867019	838
UCS	CASP6	cg05295810_CASP6	-0.303993	0.0218748	839
UCS	CASP8	cg14930754_CASP8	-0.0773269	0.566535	841
UCS	CASP9	cg12138346_CASP9	-0.435053	0.00080536	842
UCS	ELANE	cg21586152_ELANE	-0.0178918	0.894907	1991
UCS	GPX4	cg14894245_GPX4	-0.282603	0.0335234	2879
UCS	GSDMA	cg24910161_GSDMA	-0.244921	0.0663244	284110
UCS	GSDMB	cg21499348_GSDMB	-0.186285	0.164926	55876
UCS	GSDMC	cg05316065_GSDMC	-0.365543	0.00517198	56169
UCS	GSDMD	cg23101464_GSDMD	-0.625097	4.12526e-07	79792
UCS	GSDME	cg00473134_DFNA5	-0.226277	0.0905869	1687
UCS	IL18	cg11304234_IL18	-0.39344	0.00263949	3606
UCS	IL1B	cg18773937_IL1B	-0.115699	0.390397	3553
UCS	IL6	cg00087425_IL6	0.0694841	0.606628	3569
UCS	NLRC4	cg21028608_NLRC4	-0.0934664	0.488184	58484
UCS	NLRP1	cg00268086_NLRP1	-0.224656	0.0929675	22861
UCS	NLRP2	cg24040502_NLRP2	-0.798691	9.78905e-14	55655
UCS	NLRP3	cg21806273_NLRP3	-0.0705859	0.60092	114548
UCS	NLRP6	cg03009397_NLRP6	-0.183895	0.170897	171389
UCS	NLRP7	cg01560554_NLRP7	0.281466	0.033919	199713
UCS	NOD1	cg04071779_NOD1	-0.336272	0.0108682	10392
UCS	NOD2	cg06181567_NOD2	-0.239889	0.0724354	64127
UCS	PJVK	cg25102782_DFNB59	-0.280334	0.0350183	494513
UCS	PLCG1	cg04964562_PLCG1	-0.420988	0.00122216	5335
UCS	PRKACA	cg26670249_PRKACA	-0.44309	0.000629774	5566
UCS	PYCARD	cg05214748_PYCARD	-0.255574	0.0552625	29108
UCS	TIRAP	cg02973469_TIRAP	-0.28889	0.0296569	114609
UCS	TNF	cg15989608_TNF	0.195978	0.144007	7124
UVM	AIM2	cg27296413_AIM2	-0.445225	3.5011e-05	9447
UVM	CASP1	cg13802966_CASP1	-0.74285	0	834
UVM	CASP3	cg07234880_CASP3	-0.32241	0.00368409	836
UVM	CASP4	cg16669455_CASP4	-0.135373	0.230693	837
UVM	CASP5	cg10825847_CASP5	-0.437807	4.8817e-05	838
UVM	CASP6	cg05295810_CASP6	-0.331294	0.00281099	839
UVM	CASP8	cg05130485_CASP8	-0.314487	0.00465967	841
UVM	CASP9	cg12138346_CASP9	-0.614088	1.66631e-09	842
UVM	ELANE	cg26717554_ELANE	-0.15081	0.181777	1991
UVM	GPX4	cg13612480_GPX4	-0.228387	0.0417969	2879
UVM	GSDMA	cg10794714_GSDMA	-0.104203	0.357645	284110
UVM	GSDMB	cg05725940_GSDMB	-0.0978223	0.387999	55876
UVM	GSDMC	cg05316065_GSDMC	-0.35136	0.0013947	56169
UVM	GSDMD	cg26173173_GSDMD	-0.47616	1.0381e-05	79792
UVM	GSDME	cg00473134_DFNA5	-0.550375	2.0627e-07	1687
UVM	IL18	cg11304234_IL18	-0.301711	0.00672255	3606
UVM	IL1B	cg01290568_IL1B	-0.39452	0.000293223	3553
UVM	IL6	cg07998387_IL6	-0.0483155	0.670404	3569
UVM	NLRC4	cg07055315_NLRC4	-0.359402	0.00105989	58484
UVM	NLRP1	cg26561413_NLRP1	-0.558462	1.27334e-07	22861
UVM	NLRP2	cg25651476_NLRP2	-0.587226	1.0318e-08	55655
UVM	NLRP3	cg21806273_NLRP3	-0.376629	0.000626111	114548
UVM	NLRP6	cg06432119_NLRP6	-0.167343	0.137892	171389
UVM	NLRP7	cg27131908_NLRP7	-0.268297	0.0161174	199713
UVM	NOD1	cg04071779_NOD1	-0.549508	2.17049e-07	10392
UVM	NOD2	cg04172533_NOD2	-0.537342	4.37023e-07	64127
UVM	PJVK	cg15658577_DFNB59	-0.161955	0.150966	494513
UVM	PLCG1	cg11602459_PLCG1	-0.29135	0.00895148	5335
UVM	PRKACA	cg01010868_PRKACA	-0.365963	0.000908406	5566
UVM	PYCARD	cg05214748_PYCARD	-0.581294	2.96959e-08	29108
UVM	TIRAP	cg21117426_TIRAP	-0.265331	0.0176228	114609
UVM	TNF	cg09637172_TNF	-0.430659	6.6761e-05	7124

## Sheet: Table S6
Table S6 CTRP drug sensitivity for pyroptosis genes in cancers
Symbol	Drug	Cor	Fdr	Entrez
AIM2	BRD-K75293299	0.248562	0.149585	9447
AIM2	cimetidine	0.204271	0.779675	9447
AIM2	abiraterone	0.158724	0.190527	9447
AIM2	BRD-K96970199	0.154342	0.998764	9447
AIM2	BRD-K96431673	0.146816	0.985799	9447
AIM2	BRD-K86535717	0.118232	0.680888	9447
AIM2	ML334 diastereomer	0.1168	0.0664334	9447
AIM2	VAF-347	0.104828	0.0785532	9447
AIM2	BRD-K48477130	0.102444	0.590678	9447
AIM2	A-804598	0.100667	0.439767	9447
AIM2	nelarabine	0.0996338	0.558075	9447
AIM2	BRD-K09587429	0.0951173	0.112746	9447
AIM2	BRD-K02492147	0.089117	0.111303	9447
AIM2	sitagliptin	0.0889867	0.997718	9447
AIM2	BRD-K78574327	0.088855	0.962739	9447
AIM2	fulvestrant	0.0882465	0.804698	9447
AIM2	austocystin D	0.0866903	0.0591184	9447
AIM2	myriocin	0.0844108	0.86279	9447
AIM2	BRD-K04800985	0.0807394	0.99881	9447
AIM2	968	0.0793007	0.973489	9447
AIM2	BRD-K99006945	0.0785163	0.277143	9447
AIM2	FSC231	0.0759945	0.99945	9447
AIM2	ML029	0.0747796	0.09175	9447
AIM2	BRD-K84807411	0.0735285	0.792099	9447
AIM2	BRD-K49290616	0.0712208	0.856709	9447
AIM2	FGIN-1-27	0.0710643	0.595208	9447
AIM2	ifosfamide	0.0681734	0.719481	9447
AIM2	BRD-K30019337	0.0670875	0.817301	9447
AIM2	PF-4800567 hydrochloride	0.0648014	0.999586	9447
AIM2	myricetin	0.0627299	0.549627	9447
AIM2	QS-11	0.0614989	0.830512	9447
AIM2	BRD-K09344309	0.0601692	0.923574	9447
AIM2	ML312	0.0598491	0.968701	9447
AIM2	IU1	0.0598206	0.487506	9447
AIM2	BRD-K17060750	0.058999	0.241946	9447
AIM2	BRD-K41334119	0.0584708	0.92787	9447
AIM2	nintedanib	0.056394	0.297979	9447
AIM2	CID-5951923	0.0543365	0.520719	9447
AIM2	BMS-754807	0.0521879	0.266692	9447
AIM2	BRD8958	0.0501202	0.982209	9447
AIM2	procarbazine	0.0466218	0.789784	9447
AIM2	BRD-K34099515	0.0464669	0.959076	9447
AIM2	lenvatinib	0.0464325	0.328726	9447
AIM2	BRD-K64610608	0.0456729	0.691389	9447
AIM2	BRD-K34485477	0.0453543	0.998562	9447
AIM2	BRD-K42260513	0.0450968	0.994633	9447
AIM2	UNC0321	0.0446637	0.687111	9447
AIM2	RG-108	0.0423868	0.378221	9447
AIM2	cytochalasin B	0.0421814	0.439137	9447
AIM2	SR8278	0.0394826	0.925583	9447
AIM2	AZD1480	0.0392257	0.626616	9447
AIM2	cediranib	0.0363275	0.801619	9447
AIM2	BCL-LZH-4	0.0353586	0.885026	9447
AIM2	importazole	0.0339362	0.613755	9447
AIM2	brefeldin A	0.0335228	0.488152	9447
AIM2	cyclophosphamide	0.0332798	0.993392	9447
AIM2	CIL55	0.0309772	0.903448	9447
AIM2	veliparib	0.0297756	0.737297	9447
AIM2	GMX-1778	0.0275529	0.546653	9447
AIM2	cyanoquinoline 11	0.0253115	0.813162	9447
AIM2	sildenafil	0.0246985	0.862998	9447
AIM2	ML083	0.0242084	0.866332	9447
AIM2	SB-525334	0.0242065	0.685897	9447
AIM2	daporinad	0.0234954	0.645776	9447
AIM2	BRD-K14844214	0.0229415	0.788921	9447
AIM2	NVP-TAE684	0.0191698	0.734657	9447
AIM2	erismodegib	0.0190157	0.851684	9447
AIM2	linsitinib	0.0171424	0.730348	9447
AIM2	BRD-A05715709	0.0165099	0.927134	9447
AIM2	KH-CB19	0.0164312	0.903707	9447
AIM2	NSC30930	0.015392	0.867323	9447
AIM2	PRL-3 inhibitor I	0.0146789	0.930004	9447
AIM2	tamoxifen	0.0143098	0.86942	9447
AIM2	MI-1	0.0130645	0.90968	9447
AIM2	JW-480	0.0121613	0.952445	9447
AIM2	PF-750	0.0116513	0.834543	9447
AIM2	BRD4132	0.0113977	0.889621	9447
AIM2	BRD-K27224038	0.0112944	0.973703	9447
AIM2	AZ-3146	0.0105109	0.831546	9447
AIM2	saracatinib	0.00953981	0.877851	9447
AIM2	palmostatin B	0.00765566	0.961006	9447
AIM2	BRD-K50799972	0.00750892	0.940322	9447
AIM2	ML258	0.00717943	0.959516	9447
AIM2	BRD-M00053801	0.00617717	0.967974	9447
AIM2	foretinib	0.00261336	0.963314	9447
AIM2	tivozanib	0.00219134	0.973563	9447
AIM2	SMER-3	0.00113275	0.983609	9447
AIM2	SRT-1720	0.000934569	0.986842	9447
AIM2	UNC0638	0.000699972	0.988975	9447
AIM2	AT7867	0.000278	0.996372	9447
AIM2	AZD4547	-8.9041e-05	0.998592	9447
AIM2	Compound 1541A	-0.000103409	0.999395	9447
AIM2	nilotinib	-0.000207134	0.997968	9447
AIM2	CAY10576	-0.000594901	0.99509	9447
AIM2	BRD-K16147474	-0.000971359	0.997422	9447
AIM2	KHS101	-0.00115406	0.982631	9447
AIM2	hyperforin	-0.00139839	0.992276	9447
AIM2	etomoxir	-0.00169623	0.998386	9447
AIM2	CAY10618	-0.00197971	0.968157	9447
AIM2	Ki8751	-0.00256931	0.966192	9447
AIM2	BRD-K19103580	-0.00273299	0.965632	9447
AIM2	BRD1378	-0.00343993	0.986507	9447
AIM2	vandetanib	-0.0037374	0.957917	9447
AIM2	BRD-K27986637	-0.00383003	0.986302	9447
AIM2	BRD8899	-0.00410659	0.979444	9447
AIM2	SCH-529074	-0.00413097	0.945269	9447
AIM2	erastin	-0.00433543	0.935669	9447
AIM2	WAY-362450	-0.00451102	0.998521	9447
AIM2	LY-2157299	-0.00453994	0.992109	9447
AIM2	itraconazole	-0.00470206	0.963744	9447
AIM2	isonicotinohydroxamic acid	-0.0048062	0.993861	9447
AIM2	NVP-ADW742	-0.00488951	0.92919	9447
AIM2	BRD-K97651142	-0.00523236	0.914038	9447
AIM2	oligomycin A	-0.00561807	0.905803	9447
AIM2	trifluoperazine	-0.00622267	0.926956	9447
AIM2	pifithrin-mu	-0.00636885	0.889935	9447
AIM2	quizartinib	-0.00665231	0.931424	9447
AIM2	CIL70	-0.007205	0.923133	9447
AIM2	CBB-1007	-0.00819765	0.976632	9447
AIM2	RITA	-0.00858325	0.863543	9447
AIM2	16-beta-bromoandrosterone	-0.00861737	0.886821	9447
AIM2	BRD-K02251932	-0.00923219	0.886394	9447
AIM2	betulinic acid	-0.0093683	0.969414	9447
AIM2	PF-543	-0.0102225	0.855031	9447
AIM2	sorafenib	-0.0102318	0.84171	9447
AIM2	masitinib	-0.0104328	0.832452	9447
AIM2	BRD-K52037352	-0.0105378	0.899527	9447
AIM2	MK-0752	-0.0106244	0.908407	9447
AIM2	VU0155056	-0.0113049	0.982825	9447
AIM2	BRD-K88742110	-0.0113234	0.813703	9447
AIM2	BRD-K48334597	-0.0117745	0.943368	9447
AIM2	ML239	-0.0118751	0.821016	9447
AIM2	axitinib	-0.0119225	0.789467	9447
AIM2	DBeQ	-0.0124325	0.803197	9447
AIM2	BRD-K41597374	-0.0136818	0.768898	9447
AIM2	SGX-523	-0.014453	0.853035	9447
AIM2	BYL-719	-0.014841	0.866047	9447
AIM2	prochlorperazine	-0.0160612	0.771642	9447
AIM2	TG-101348	-0.0163299	0.726198	9447
AIM2	BRD9876	-0.0172695	0.815589	9447
AIM2	ciclosporin	-0.0180086	0.781682	9447
AIM2	BEC	-0.0181399	0.999979	9447
AIM2	KU 0060648	-0.0183051	0.689541	9447
AIM2	CI-976	-0.0185443	0.923172	9447
AIM2	SU11274	-0.0189875	0.676958	9447
AIM2	BRD-K33199242	-0.0190329	0.978379	9447
AIM2	SJ-172550	-0.0193212	0.891051	9447
AIM2	parthenolide	-0.0195278	0.770641	9447
AIM2	valdecoxib	-0.0202997	0.645966	9447
AIM2	GSK4112	-0.0206593	0.717291	9447
AIM2	BRD1835	-0.0207739	0.707046	9447
AIM2	PX-12	-0.0214464	0.602533	9447
AIM2	barasertib	-0.0216498	0.622274	9447
AIM2	BRD-K85133207	-0.0221528	0.65292	9447
AIM2	darinaparsin	-0.0236596	0.760263	9447
AIM2	tipifarnib-P2	-0.0253895	0.686517	9447
AIM2	spautin-1	-0.0259192	0.633861	9447
AIM2	SZ4TA2	-0.0260007	0.859298	9447
AIM2	erlotinib	-0.0261189	0.612078	9447
AIM2	staurosporine	-0.0261377	0.877524	9447
AIM2	HLI 373	-0.0271998	0.555087	9447
AIM2	blebbistatin	-0.0280292	0.977857	9447
AIM2	TGX-221	-0.0281219	0.747772	9447
AIM2	crizotinib	-0.0283323	0.506493	9447
AIM2	BRD5468	-0.0305276	0.76109	9447
AIM2	Ko-143	-0.0309173	0.476876	9447
AIM2	TG-100-115	-0.0317788	0.581323	9447
AIM2	BRD-K71781559	-0.0324463	0.991525	9447
AIM2	C6-ceramide	-0.0325836	0.789272	9447
AIM2	BMS-195614	-0.0331681	0.628629	9447
AIM2	BRD-K13999467	-0.0335653	0.474089	9447
AIM2	PF-573228	-0.0338723	0.431302	9447
AIM2	tandutinib	-0.0339307	0.482398	9447
AIM2	nutlin-3	-0.0344114	0.43058	9447
AIM2	AC55649	-0.0345615	0.798838	9447
AIM2	CIL41	-0.0354761	0.651769	9447
AIM2	imatinib	-0.0356553	0.437944	9447
AIM2	CIL55A	-0.036308	0.585865	9447
AIM2	Repligen 136	-0.037805	0.411003	9447
AIM2	navitoclax	-0.0379269	0.407972	9447
AIM2	IC-87114	-0.0385127	0.590423	9447
AIM2	pazopanib	-0.0387384	0.359608	9447
AIM2	tacrolimus	-0.0388341	0.39728	9447
AIM2	DNMDP	-0.0397385	0.595852	9447
AIM2	BRD-K29313308	-0.0398202	0.381376	9447
AIM2	birinapant	-0.0399278	0.561564	9447
AIM2	istradefylline	-0.0403096	0.825344	9447
AIM2	EX-527	-0.0403911	0.749323	9447
AIM2	AZD7545	-0.0407174	0.374217	9447
AIM2	BRD-K37390332	-0.0415066	0.845801	9447
AIM2	necrostatin-1	-0.042967	0.385499	9447
AIM2	silmitasertib	-0.0433736	0.619526	9447
AIM2	tamatinib	-0.0436064	0.604856	9447
AIM2	PRIMA-1	-0.0441629	0.286707	9447
AIM2	STF-31	-0.0445446	0.301852	9447
AIM2	PYR-41	-0.0453967	0.408328	9447
AIM2	selumetinib	-0.0455183	0.382064	9447
AIM2	L-685458	-0.0464775	0.452135	9447
AIM2	SB-431542	-0.0465789	0.641171	9447
AIM2	simvastatin	-0.0474418	0.428568	9447
AIM2	CAY10594	-0.0476369	0.425362	9447
AIM2	BRD-K92856060	-0.0485692	0.265585	9447
AIM2	pandacostat	-0.0490126	0.301308	9447
AIM2	ML031	-0.0491461	0.27576	9447
AIM2	BRD-K26531177	-0.0493958	0.251745	9447
AIM2	ETP-46464	-0.049671	0.38239	9447
AIM2	avicin D	-0.0500848	0.607289	9447
AIM2	JW-74	-0.0506608	0.57266	9447
AIM2	regorafenib	-0.0509417	0.316125	9447
AIM2	brivanib	-0.0512512	0.221957	9447
AIM2	MI-2	-0.0513262	0.473712	9447
AIM2	ibrutinib	-0.0516146	0.397936	9447
AIM2	AGK-2	-0.05178	0.893613	9447
AIM2	pyrazolanthrone	-0.0526385	0.30062	9447
AIM2	serdemetan	-0.0526533	0.209022	9447
AIM2	cucurbitacin I	-0.0526622	0.219305	9447
AIM2	ZSTK474	-0.0527682	0.334655	9447
AIM2	Compound 23 citrate	-0.0527935	0.195463	9447
AIM2	BRD-K55116708	-0.0530313	0.258347	9447
AIM2	BIBR-1532	-0.0535465	0.262186	9447
AIM2	IPR-456	-0.0536658	0.691544	9447
AIM2	BRD-K24690302	-0.0538976	0.221748	9447
AIM2	HC-067047	-0.0539505	0.376802	9447
AIM2	BRD-K28456706	-0.0546279	0.20712	9447
AIM2	MLN2480	-0.0546476	0.611096	9447
AIM2	SR1001	-0.0549951	0.425451	9447
AIM2	BRD-K90370028	-0.0551295	0.906526	9447
AIM2	vorapaxar	-0.0553204	0.249257	9447
AIM2	BRD-K44224150	-0.0554188	0.992666	9447
AIM2	semagacestat	-0.0555357	0.658365	9447
AIM2	GANT-61	-0.0556198	0.341166	9447
AIM2	ML203	-0.0561548	0.283927	9447
AIM2	ABT-737	-0.0565315	0.221452	9447
AIM2	NPC-26	-0.0567284	0.58474	9447
AIM2	SCH-79797	-0.0576277	0.154006	9447
AIM2	pitstop2	-0.0577299	0.76097	9447
AIM2	SKI-II	-0.0579687	0.204347	9447
AIM2	afatinib	-0.0584142	0.224422	9447
AIM2	BRD-A94377914	-0.0585894	0.322863	9447
AIM2	GDC-0941	-0.0594098	0.194905	9447
AIM2	gefitinib	-0.059499	0.241199	9447
AIM2	azacitidine	-0.0604833	0.207696	9447
AIM2	NVP-BEZ235	-0.0605689	0.242015	9447
AIM2	PRIMA-1-Met	-0.0608569	0.405744	9447
AIM2	indisulam	-0.0611838	0.136187	9447
AIM2	thalidomide	-0.0622169	0.750112	9447
AIM2	HBX-41108	-0.0622377	0.274451	9447
AIM2	phloretin	-0.062771	0.120196	9447
AIM2	JW-55	-0.0643518	0.63345	9447
AIM2	ML162	-0.0646032	0.129556	9447
AIM2	BRD-A02303741	-0.0649481	0.223325	9447
AIM2	MK-2206	-0.0651074	0.138338	9447
AIM2	bafilomycin A1	-0.0651679	0.921173	9447
AIM2	dasatinib	-0.0656619	0.158097	9447
AIM2	olaparib	-0.0659234	0.108497	9447
AIM2	cabozantinib	-0.0660324	0.16682	9447
AIM2	BRD6340	-0.0667605	0.0993661	9447
AIM2	methylstat	-0.066989	0.17971	9447
AIM2	GW-405833	-0.0681535	0.0852945	9447
AIM2	SID 26681509	-0.0683607	0.137247	9447
AIM2	TW-37	-0.0684885	0.0965033	9447
AIM2	MGCD-265	-0.068549	0.0857587	9447
AIM2	triptolide	-0.0697114	0.0822845	9447
AIM2	GDC-0879	-0.0710529	0.167591	9447
AIM2	ML050	-0.0714375	0.0973504	9447
AIM2	lomeguatrib	-0.0715431	0.184533	9447
AIM2	GSK1059615	-0.0717448	0.78988	9447
AIM2	tipifarnib-P1	-0.072022	0.0718396	9447
AIM2	JQ-1	-0.0737961	0.0567781	9447
AIM2	ML006	-0.0738341	0.15387	9447
AIM2	ML210	-0.0741391	0.0745744	9447
AIM2	PDMP	-0.0743032	0.0842599	9447
AIM2	O-6-benzylguanine	-0.0744374	0.548829	9447
AIM2	WZ4002	-0.0746926	0.269226	9447
AIM2	BRD-K51490254	-0.0747318	0.0792147	9447
AIM2	B02	-0.0748496	0.0679252	9447
AIM2	NSC19630	-0.0748872	0.130797	9447
AIM2	AM-580	-0.0753296	0.129234	9447
AIM2	GSK2636771	-0.0755055	0.39636	9447
AIM2	Bax channel blocker	-0.0765815	0.0863176	9447
AIM2	BRD-K45681478	-0.076676	0.0843483	9447
AIM2	R428	-0.0767143	0.136829	9447
AIM2	epigallocatechin-3-monogallate	-0.077088	0.0884715	9447
AIM2	XL765	-0.077241	0.151818	9447
AIM2	purmorphamine	-0.078054	0.0945251	9447
AIM2	1S,3R-RSL-3	-0.078239	0.0546452	9447
AIM2	linifanib	-0.0786483	0.0456363	9447
AIM2	ML320	-0.0789051	0.0827135	9447
AIM2	KU-0063794	-0.0789587	0.0539284	9447
AIM2	marinopyrrole A	-0.0792081	0.125398	9447
AIM2	gossypol	-0.0795107	0.050974	9447
AIM2	NSC 74859	-0.0799647	0.107318	9447
AIM2	fluvastatin	-0.0800668	0.108505	9447
AIM2	tubastatin A	-0.0801305	0.201826	9447
AIM2	BRD-K29086754	-0.0810265	0.690428	9447
AIM2	vorinostat	-0.0818262	0.0360932	9447
AIM2	KW-2449	-0.0820823	0.0350296	9447
AIM2	cerulenin	-0.0824186	0.0355901	9447
AIM2	BRD-K35604418	-0.0824801	0.0390577	9447
AIM2	NVP-BSK805	-0.0828662	0.0391236	9447
AIM2	BRD-K11533227	-0.0831691	0.0558642	9447
AIM2	alisertib	-0.0832925	0.0345848	9447
AIM2	BMS-536924	-0.0835541	0.0930377	9447
AIM2	necrostatin-7	-0.0835672	0.0588951	9447
AIM2	OSI-027	-0.0841112	0.0463211	9447
AIM2	PL-DI	-0.0848016	0.0302654	9447
AIM2	KU-60019	-0.0858525	0.0304672	9447
AIM2	CAL-101	-0.0859858	0.106705	9447
AIM2	Compound 7d-cis	-0.0866175	0.0466178	9447
AIM2	PD318088	-0.0867103	0.0540321	9447
AIM2	vemurafenib	-0.0869122	0.0923845	9447
AIM2	BRD-A71883111	-0.0872578	0.0412459	9447
AIM2	tanespimycin	-0.087429	0.0800559	9447
AIM2	ouabain	-0.0885493	0.0213592	9447
AIM2	OSI-930	-0.0888615	0.0455631	9447
AIM2	lovastatin	-0.0889664	0.0595081	9447
AIM2	neratinib	-0.0889917	0.035772	9447
AIM2	CCT036477	-0.0895758	0.0234968	9447
AIM2	YM-155	-0.0896796	0.0537799	9447
AIM2	BRD-K34222889	-0.0901635	0.0197027	9447
AIM2	BRD-K70511574	-0.090871	0.0189612	9447
AIM2	niclosamide	-0.0917834	0.0309463	9447
AIM2	Mdivi-1	-0.0919917	0.0270299	9447
AIM2	bleomycin A2	-0.0921697	0.0671347	9447
AIM2	BIX-01294	-0.0924526	0.0183711	9447
AIM2	tacedinaline	-0.0926733	0.0489426	9447
AIM2	WZ8040	-0.0931152	0.055647	9447
AIM2	NSC95397	-0.0934352	0.023665	9447
AIM2	WP1130	-0.0936514	0.0207366	9447
AIM2	PI-103	-0.0941608	0.0217782	9447
AIM2	ceranib-2	-0.0947234	0.0132128	9447
AIM2	FQI-1	-0.0953119	0.0920284	9447
AIM2	zebularine	-0.0958273	0.0156814	9447
AIM2	FQI-2	-0.0964983	0.0113937	9447
AIM2	StemRegenin 1	-0.0966338	0.0162794	9447
AIM2	PAC-1	-0.0966829	0.0157398	9447
AIM2	BIRB-796	-0.0974884	0.0272483	9447
AIM2	canertinib	-0.0978253	0.026807	9447
AIM2	RAF265	-0.0982784	0.0577003	9447
AIM2	KX2-391	-0.0988301	0.0105857	9447
AIM2	PD 153035	-0.0998747	0.0676281	9447
AIM2	sunitinib	-0.100864	0.0115951	9447
AIM2	GW-843682X	-0.100877	0.0132982	9447
AIM2	TPCA-1	-0.101219	0.0101488	9447
AIM2	temozolomide	-0.101314	0.0868907	9447
AIM2	dexamethasone	-0.101516	0.0149486	9447
AIM2	QW-BI-011	-0.101561	0.271048	9447
AIM2	lapatinib	-0.101774	0.0183332	9447
AIM2	SB-743921	-0.10184	0.00677045	9447
AIM2	tretinoin	-0.102383	0.0119678	9447
AIM2	decitabine	-0.105177	0.00551972	9447
AIM2	temsirolimus	-0.105178	0.0854645	9447
AIM2	avrainvillamide	-0.105228	0.0298069	9447
AIM2	AZD6482	-0.106176	0.034216	9447
AIM2	pevonedistat	-0.108851	0.00607657	9447
AIM2	piperlongumine	-0.108855	0.00412716	9447
AIM2	ML311	-0.108947	0.00400218	9447
AIM2	BRD-K63431240	-0.109297	0.00837478	9447
AIM2	neuronal differentiation inducer III	-0.110431	0.00413278	9447
AIM2	NVP-231	-0.110604	0.00424666	9447
AIM2	PIK-93	-0.111634	0.00615465	9447
AIM2	fluorouracil	-0.111813	0.00374088	9447
AIM2	KU-55933	-0.111949	0.00749024	9447
AIM2	BI-2536	-0.112746	0.00252092	9447
AIM2	GSK525762A	-0.11469	0.00250582	9447
AIM2	GSK-3 inhibitor IX	-0.115639	0.00524628	9447
AIM2	bardoxolone methyl	-0.115843	0.00542233	9447
AIM2	CD-1530	-0.115867	0.0222186	9447
AIM2	rigosertib	-0.11596	0.00294764	9447
AIM2	ABT-199	-0.116334	0.0312917	9447
AIM2	panobinostat	-0.116552	0.00201716	9447
AIM2	AT-406	-0.117287	0.1971	9447
AIM2	pifithrin-alpha	-0.117685	0.0251421	9447
AIM2	BRD1812	-0.117843	0.00295034	9447
AIM2	nakiterpiosin	-0.118154	0.00207275	9447
AIM2	PLX-4720	-0.119148	0.037403	9447
AIM2	3-Cl-AHPC	-0.119478	0.00188197	9447
AIM2	sirolimus	-0.119578	0.00217161	9447
AIM2	BMS-345541	-0.119601	0.00215155	9447
AIM2	BRD-K80183349	-0.120464	0.00206908	9447
AIM2	BMS-270394	-0.120561	0.00501255	9447
AIM2	neopeltolide	-0.12184	0.18965	9447
AIM2	AZD8055	-0.122125	0.00200873	9447
AIM2	ISOX	-0.122669	0.00135497	9447
AIM2	Ch-55	-0.123738	0.00484495	9447
AIM2	mitomycin	-0.124553	0.00115292	9447
AIM2	chlorambucil	-0.124646	0.00132669	9447
AIM2	NSC23766	-0.125342	0.00163761	9447
AIM2	fumonisin B1	-0.125348	0.0105387	9447
AIM2	LY-2183240	-0.125476	0.000866224	9447
AIM2	omacetaxine mepesuccinate	-0.125934	0.00547573	9447
AIM2	ELCPK	-0.126468	0.0335371	9447
AIM2	cytarabine hydrochloride	-0.126862	0.000735731	9447
AIM2	bendamustine	-0.127414	0.0023472	9447
AIM2	parbendazole	-0.12775	0.000593888	9447
AIM2	tigecycline	-0.12937	0.0275338	9447
AIM2	elocalcitol	-0.130952	0.000708816	9447
AIM2	NSC48300	-0.132947	0.000534582	9447
AIM2	SB-225002	-0.133273	0.000355095	9447
AIM2	AA-COCF3	-0.133451	0.00105859	9447
AIM2	sotrastaurin	-0.134148	0.00366941	9447
AIM2	GSK461364	-0.134961	0.000381422	9447
AIM2	methotrexate	-0.13534	0.000825742	9447
AIM2	vincristine	-0.135588	0.000219849	9447
AIM2	CHM-1	-0.135756	0.000314003	9447
AIM2	I-BET151	-0.136807	0.000250406	9447
AIM2	VER-155008	-0.137348	0.000718317	9447
AIM2	MK-1775	-0.137505	0.000375159	9447
AIM2	obatoclax	-0.137818	0.000296017	9447
AIM2	curcumin	-0.13806	0.000308904	9447
AIM2	ciclopirox	-0.138263	0.000210508	9447
AIM2	CHIR-99021	-0.138414	0.000625206	9447
AIM2	isoevodiamine	-0.139071	0.000227258	9447
AIM2	paclitaxel	-0.139134	0.000278408	9447
AIM2	salermide	-0.139946	0.0918726	9447
AIM2	ruxolitinib	-0.140239	0.000457991	9447
AIM2	YK 4-279	-0.140669	0.000189054	9447
AIM2	bexarotene	-0.14069	0.000759696	9447
AIM2	pluripotin	-0.143685	0.000939249	9447
AIM2	BRD9647	-0.143777	0.00164003	9447
AIM2	bosutinib	-0.14602	0.000247931	9447
AIM2	necrosulfonamide	-0.146367	0.00174135	9447
AIM2	PHA-793887	-0.146764	8.6604e-05	9447
AIM2	N9-isopropylolomoucine	-0.147108	0.000221062	9447
AIM2	CIL56	-0.147669	0.0117653	9447
AIM2	momelotinib	-0.147839	0.000205607	9447
AIM2	SN-38	-0.149568	0.000440716	9447
AIM2	LE-135	-0.150032	0.000327341	9447
AIM2	MG-132	-0.150269	0.0494635	9447
AIM2	BRD-A86708339	-0.153105	0.00918914	9447
AIM2	tivantinib	-0.153822	0.00634871	9447
AIM2	COL-3	-0.155101	0.000576975	9447
AIM2	AZD7762	-0.15581	3.596e-05	9447
AIM2	BRD-K61166597	-0.156884	6.4093e-05	9447
AIM2	narciclasine	-0.156941	3.7931e-05	9447
AIM2	NSC632839	-0.157075	3.2202e-05	9447
AIM2	teniposide	-0.157235	0.00325181	9447
AIM2	fingolimod	-0.157921	4.4808e-05	9447
AIM2	LRRK2-IN-1	-0.160245	0.000392422	9447
AIM2	tosedostat	-0.160558	7.716e-05	9447
AIM2	BRD-K66453893	-0.164121	1.3017e-05	9447
AIM2	GSK-J4	-0.16452	0.308512	9447
AIM2	PF-184	-0.165466	1.724e-05	9447
AIM2	SR-II-138A	-0.168005	4.60152e-06	9447
AIM2	BRD-K66532283	-0.169446	1.5513e-05	9447
AIM2	dacarbazine	-0.16971	8.34786e-06	9447
AIM2	bortezomib	-0.171826	8.63192e-06	9447
AIM2	entinostat	-0.172056	5.71986e-06	9447
AIM2	skepinone-L	-0.173629	0.00381237	9447
AIM2	etoposide	-0.173761	3.23991e-06	9447
AIM2	SNS-032	-0.173817	1.4036e-05	9447
AIM2	docetaxel	-0.173966	0.0027827	9447
AIM2	gemcitabine	-0.174866	8.19937e-06	9447
AIM2	Merck60	-0.175139	2.71978e-06	9447
AIM2	MST-312	-0.177998	2.74629e-06	9447
AIM2	trametinib	-0.178227	0.00655538	9447
AIM2	triazolothiadiazine	-0.178815	1.12562e-06	9447
AIM2	apicidin	-0.182879	7.84546e-07	9447
AIM2	manumycin A	-0.185587	6.96689e-07	9447
AIM2	topotecan	-0.18653	4.07813e-07	9447
AIM2	doxorubicin	-0.189032	2.47682e-07	9447
AIM2	leptomycin B	-0.189802	2.13131e-07	9447
AIM2	CR-1-31B	-0.190821	2.17606e-07	9447
AIM2	CD-437	-0.190861	3.5358e-07	9447
AIM2	PF-3758309	-0.194536	0.000399954	9447
AIM2	KPT185	-0.196068	8.18249e-06	9447
AIM2	BRD-K33514849	-0.199182	0.999288	9447
AIM2	MLN2238	-0.203696	8.12297e-08	9447
AIM2	isoliquiritigenin	-0.210146	0.0107535	9447
AIM2	clofarabine	-0.21315	5.73871e-09	9447
AIM2	belinostat	-0.213976	7.9468e-05	9447
AIM2	SNX-2112	-0.214983	4.5506e-09	9447
AIM2	RO4929097	-0.215908	0.00285905	9447
AIM2	dinaciclib	-0.226736	3.562e-05	9447
AIM2	BRD-K30748066	-0.23815	0.159171	9447
AIM2	alvocidib	-0.24091	1.5146e-05	9447
AIM2	BRD-K51831558	-0.248764	0.000216118	9447
AIM2	AT13387	-0.250359	8.5476e-06	9447
AIM2	tozasertib	-0.253472	0.109458	9447
AIM2	dabrafenib	-0.254576	6.484e-05	9447
AIM2	BRD-K01737880	-0.303948	0.0811059	9447
CASP1	SR8278	0.273164	0.396713	834
CASP1	BRD-K09344309	0.262472	0.363884	834
CASP1	abiraterone	0.233317	0.0480444	834
CASP1	GSK-J4	0.227457	0.138431	834
CASP1	austocystin D	0.204563	9.67575e-07	834
CASP1	BRD-K34099515	0.189782	0.708658	834
CASP1	SB-525334	0.169307	0.000146882	834
CASP1	MI-2	0.152089	0.0172618	834
CASP1	BRD-K33514849	0.141164	0.999288	834
CASP1	VAF-347	0.133387	0.02194	834
CASP1	belinostat	0.127031	0.0229755	834
CASP1	JW-55	0.123372	0.317512	834
CASP1	ML239	0.118394	0.00375676	834
CASP1	ifosfamide	0.117489	0.497219	834
CASP1	skepinone-L	0.116155	0.0595787	834
CASP1	EX-527	0.111085	0.283695	834
CASP1	valdecoxib	0.110326	0.00575791	834
CASP1	A-804598	0.10989	0.395361	834
CASP1	PRL-3 inhibitor I	0.108187	0.223637	834
CASP1	CID-5951923	0.107681	0.164859	834
CASP1	erismodegib	0.103591	0.112788	834
CASP1	parthenolide	0.102453	0.0503728	834
CASP1	ML029	0.101627	0.0183346	834
CASP1	sorafenib	0.101299	0.0170326	834
CASP1	GMX-1778	0.0989049	0.0143814	834
CASP1	PF-750	0.0966663	0.0351779	834
CASP1	myricetin	0.0966567	0.359204	834
CASP1	CAY10618	0.094119	0.0174579	834
CASP1	RG-108	0.0935786	0.0297423	834
CASP1	CIL41	0.0930351	0.174321	834
CASP1	SZ4TA2	0.0921504	0.377254	834
CASP1	BRD-K34485477	0.0893537	0.998562	834
CASP1	daporinad	0.0885324	0.0473213	834
CASP1	BMS-195614	0.0881966	0.118315	834
CASP1	BRD-K97651142	0.086361	0.0385599	834
CASP1	niclosamide	0.0858059	0.0452373	834
CASP1	hyperforin	0.0854689	0.253413	834
CASP1	linsitinib	0.0840905	0.0497297	834
CASP1	pifithrin-mu	0.0836054	0.0365962	834
CASP1	marinopyrrole A	0.0832106	0.106184	834
CASP1	cerulenin	0.0824594	0.0354944	834
CASP1	ML334 diastereomer	0.0815667	0.224813	834
CASP1	BRD-K51490254	0.0802053	0.0582979	834
CASP1	CIL70	0.0782837	0.189609	834
CASP1	oligomycin A	0.077286	0.0556382	834
CASP1	necrostatin-7	0.0771687	0.0841401	834
CASP1	CBB-1007	0.0759035	0.621796	834
CASP1	BRD-A86708339	0.0745089	0.227715	834
CASP1	HBX-41108	0.0743219	0.182234	834
CASP1	MG-132	0.0739099	0.388475	834
CASP1	tacedinaline	0.0734662	0.123903	834
CASP1	BRD-M00053801	0.0734343	0.444354	834
CASP1	FSC231	0.0724245	0.99945	834
CASP1	BRD-K09587429	0.07192	0.247346	834
CASP1	MLN2480	0.0714991	0.473915	834
CASP1	JW-480	0.0699051	0.688298	834
CASP1	cimetidine	0.0696717	0.955144	834
CASP1	SCH-529074	0.067943	0.151091	834
CASP1	spautin-1	0.0663841	0.168727	834
CASP1	KHS101	0.0652019	0.131844	834
CASP1	MST-312	0.0648312	0.101557	834
CASP1	brefeldin A	0.0644316	0.155662	834
CASP1	PAC-1	0.0608878	0.138349	834
CASP1	NSC19630	0.0605828	0.230735	834
CASP1	BRD-K90370028	0.0589677	0.893699	834
CASP1	GSK2636771	0.056055	0.564601	834
CASP1	BRD-K35604418	0.0554666	0.175617	834
CASP1	IU1	0.0546492	0.538426	834
CASP1	BRD-K85133207	0.0538039	0.2349	834
CASP1	nilotinib	0.0537114	0.481441	834
CASP1	BRD-K45681478	0.0534443	0.246613	834
CASP1	neuronal differentiation inducer III	0.0529528	0.185087	834
CASP1	JW-74	0.051703	0.564602	834
CASP1	TW-37	0.0507274	0.229037	834
CASP1	brivanib	0.0505949	0.228439	834
CASP1	QS-11	0.0502222	0.864209	834
CASP1	BRD-K88742110	0.049639	0.253763	834
CASP1	BRD-K92856060	0.047186	0.280699	834
CASP1	OSI-930	0.0466602	0.316832	834
CASP1	vorinostat	0.0461446	0.250771	834
CASP1	BRD8958	0.0451047	0.982209	834
CASP1	YM-155	0.044284	0.378592	834
CASP1	gossypol	0.043632	0.30312	834
CASP1	STF-31	0.0434255	0.315525	834
CASP1	sitagliptin	0.0430818	0.997718	834
CASP1	BRD-K41597374	0.0429322	0.313668	834
CASP1	isonicotinohydroxamic acid	0.0427579	0.98619	834
CASP1	NSC95397	0.0422379	0.328207	834
CASP1	ML162	0.0417961	0.348017	834
CASP1	BRD-K64610608	0.041595	0.726319	834
CASP1	Compound 7d-cis	0.0410329	0.374657	834
CASP1	ML031	0.0409636	0.370051	834
CASP1	istradefylline	0.0405522	0.824564	834
CASP1	ML258	0.0401188	0.716315	834
CASP1	SCH-79797	0.0400986	0.332339	834
CASP1	BMS-754807	0.0384045	0.431826	834
CASP1	cyclophosphamide	0.0381873	0.993392	834
CASP1	phloretin	0.0374755	0.370708	834
CASP1	erastin	0.0370332	0.425564	834
CASP1	entinostat	0.0364421	0.37595	834
CASP1	BRD1812	0.0359929	0.403355	834
CASP1	XL765	0.0357047	0.576231	834
CASP1	methylstat	0.0350087	0.504593	834
CASP1	BRD1835	0.0348626	0.49908	834
CASP1	BRD-K14844214	0.0347339	0.662603	834
CASP1	neopeltolide	0.0346341	0.752654	834
CASP1	NVP-BEZ235	0.0341318	0.529786	834
CASP1	BIRB-796	0.0338237	0.489328	834
CASP1	BEC	0.033558	0.999979	834
CASP1	BRD-K27986637	0.0329797	0.867093	834
CASP1	BRD9876	0.0329526	0.62364	834
CASP1	PF-4800567 hydrochloride	0.0322038	0.999586	834
CASP1	PI-103	0.0314198	0.485865	834
CASP1	BIBR-1532	0.0313962	0.541252	834
CASP1	tivantinib	0.031183	0.622065	834
CASP1	BRD-K24690302	0.0308832	0.510302	834
CASP1	navitoclax	0.0308509	0.511153	834
CASP1	importazole	0.0306868	0.654403	834
CASP1	panobinostat	0.0306145	0.448187	834
CASP1	BRD-K51831558	0.030446	0.701934	834
CASP1	PX-12	0.0304333	0.453552	834
CASP1	ibrutinib	0.0299577	0.651232	834
CASP1	ciclopirox	0.0297834	0.455376	834
CASP1	SMER-3	0.0297466	0.551185	834
CASP1	NSC30930	0.0290868	0.722976	834
CASP1	indisulam	0.0290178	0.501764	834
CASP1	BRD-K17060750	0.0287359	0.607191	834
CASP1	PRIMA-1	0.0285853	0.50196	834
CASP1	NVP-ADW742	0.0276984	0.579075	834
CASP1	BRD4132	0.0269441	0.702641	834
CASP1	BRD-K26531177	0.0264773	0.557029	834
CASP1	nelarabine	0.0259389	0.929088	834
CASP1	BYL-719	0.0258034	0.751781	834
CASP1	ISOX	0.0249478	0.550201	834
CASP1	procarbazine	0.0249169	0.906835	834
CASP1	BRD-K04800985	0.0240644	0.99881	834
CASP1	BRD-K02251932	0.0239864	0.681119	834
CASP1	16-beta-bromoandrosterone	0.0239344	0.662039	834
CASP1	ABT-737	0.0222819	0.662945	834
CASP1	BRD-K34222889	0.0221789	0.595294	834
CASP1	piperlongumine	0.0221038	0.589567	834
CASP1	serdemetan	0.021949	0.620383	834
CASP1	BRD-K75293299	0.0205012	0.954641	834
CASP1	ML050	0.0198467	0.681646	834
CASP1	B02	0.0193355	0.668241	834
CASP1	ML083	0.0191678	0.901835	834
CASP1	ML203	0.0191457	0.75065	834
CASP1	SRT-1720	0.0187075	0.716174	834
CASP1	KU-0063794	0.0186838	0.680475	834
CASP1	BRD1378	0.0184556	0.89812	834
CASP1	thalidomide	0.0183252	0.946152	834
CASP1	ML006	0.0182617	0.767022	834
CASP1	prochlorperazine	0.0171687	0.754091	834
CASP1	nutlin-3	0.0170882	0.707562	834
CASP1	MK-0752	0.0165094	0.851646	834
CASP1	ML210	0.0159379	0.73242	834
CASP1	DBeQ	0.0158666	0.746429	834
CASP1	Ko-143	0.0154576	0.73415	834
CASP1	BRD-K42260513	0.0142463	0.998533	834
CASP1	BRD-K02492147	0.014073	0.844032	834
CASP1	tamoxifen	0.0140574	0.872842	834
CASP1	betulinic acid	0.0137528	0.951548	834
CASP1	sildenafil	0.0135185	0.938521	834
CASP1	AC55649	0.0134725	0.939005	834
CASP1	linifanib	0.0126994	0.773283	834
CASP1	BRD-K37390332	0.0123335	0.977247	834
CASP1	1S,3R-RSL-3	0.0105077	0.824059	834
CASP1	SGX-523	0.0103209	0.899756	834
CASP1	pandacostat	0.0102421	0.849866	834
CASP1	tivozanib	0.0100834	0.870078	834
CASP1	AZD7545	0.0100537	0.845865	834
CASP1	SB-225002	0.00903991	0.832152	834
CASP1	C6-ceramide	0.00903503	0.955381	834
CASP1	GSK1059615	0.00882411	0.982881	834
CASP1	WP1130	0.00849212	0.857622	834
CASP1	PYR-41	0.00776683	0.908572	834
CASP1	pifithrin-alpha	0.00772852	0.927297	834
CASP1	StemRegenin 1	0.00767287	0.868974	834
CASP1	BRD-K11533227	0.00678859	0.896714	834
CASP1	BRD-K28456706	0.00595387	0.907628	834
CASP1	PDMP	0.0058834	0.908861	834
CASP1	BRD6340	0.00570068	0.901869	834
CASP1	Ki8751	0.00531358	0.92683	834
CASP1	avrainvillamide	0.00490572	0.936147	834
CASP1	MI-1	0.00355274	0.978839	834
CASP1	cucurbitacin I	0.00325399	0.94709	834
CASP1	cyanoquinoline 11	0.00118897	0.99268	834
CASP1	TG-100-115	0.0011194	0.987272	834
CASP1	BCL-LZH-4	0.00093955	0.996975	834
CASP1	SB-431542	0.000366377	0.998564	834
CASP1	lomeguatrib	-0.000221245	0.997902	834
CASP1	Repligen 136	-0.000290446	0.995769	834
CASP1	BI-2536	-0.000797089	0.985013	834
CASP1	Bax channel blocker	-0.000819351	0.987834	834
CASP1	AA-COCF3	-0.000856224	0.986603	834
CASP1	olaparib	-0.00178912	0.972303	834
CASP1	BRD-K01737880	-0.00300817	0.99277	834
CASP1	KPT185	-0.0032031	0.953361	834
CASP1	WZ4002	-0.00381214	0.970872	834
CASP1	BRD-K71781559	-0.00385191	0.99834	834
CASP1	QW-BI-011	-0.00433133	0.970894	834
CASP1	temozolomide	-0.00510948	0.957055	834
CASP1	VU0155056	-0.00523585	0.994156	834
CASP1	PF-3758309	-0.00536382	0.935355	834
CASP1	CI-976	-0.00555722	0.977744	834
CASP1	Compound 23 citrate	-0.00576663	0.898442	834
CASP1	BRD-K19103580	-0.00621498	0.921314	834
CASP1	BRD-K13999467	-0.00633188	0.904943	834
CASP1	AZD1480	-0.00780184	0.936044	834
CASP1	BRD-K48334597	-0.00862575	0.957876	834
CASP1	UNC0321	-0.00916525	0.95432	834
CASP1	azacitidine	-0.00982871	0.864031	834
CASP1	necrosulfonamide	-0.00994819	0.855037	834
CASP1	BRD-K16147474	-0.0100055	0.98448	834
CASP1	necrostatin-1	-0.0105395	0.852037	834
CASP1	GW-405833	-0.0109042	0.802061	834
CASP1	NPC-26	-0.0110062	0.948132	834
CASP1	AZD8055	-0.0120992	0.790638	834
CASP1	BIX-01294	-0.0131555	0.76178	834
CASP1	SR1001	-0.0131633	0.884663	834
CASP1	ceranib-2	-0.0131712	0.758025	834
CASP1	etomoxir	-0.0135445	0.98208	834
CASP1	AGK-2	-0.0136266	0.980243	834
CASP1	regorafenib	-0.0154858	0.790962	834
CASP1	isoliquiritigenin	-0.0162578	0.870186	834
CASP1	AT-406	-0.0163649	0.907856	834
CASP1	alvocidib	-0.0164212	0.799805	834
CASP1	BRD5468	-0.0166315	0.886202	834
CASP1	veliparib	-0.0166644	0.867195	834
CASP1	KH-CB19	-0.0168311	0.900337	834
CASP1	RO4929097	-0.0168706	0.851296	834
CASP1	tandutinib	-0.0182934	0.71867	834
CASP1	bafilomycin A1	-0.0185647	0.981843	834
CASP1	GSK4112	-0.018666	0.748152	834
CASP1	sotrastaurin	-0.0189385	0.714892	834
CASP1	mitomycin	-0.0190331	0.656326	834
CASP1	fingolimod	-0.0197643	0.651911	834
CASP1	BRD8899	-0.0198566	0.873605	834
CASP1	quizartinib	-0.0201385	0.776487	834
CASP1	ELCPK	-0.0201909	0.774745	834
CASP1	COL-3	-0.0203152	0.688152	834
CASP1	Compound 1541A	-0.0204975	0.791317	834
CASP1	KU-60019	-0.0206105	0.635237	834
CASP1	SJ-172550	-0.0211648	0.878586	834
CASP1	WZ8040	-0.0211842	0.724453	834
CASP1	lenvatinib	-0.0215763	0.686372	834
CASP1	obatoclax	-0.0217198	0.61087	834
CASP1	NSC 74859	-0.0219738	0.719842	834
CASP1	isoevodiamine	-0.0220752	0.593672	834
CASP1	KX2-391	-0.0222992	0.593376	834
CASP1	cytarabine hydrochloride	-0.022658	0.577797	834
CASP1	BRD-K80183349	-0.0227928	0.599635	834
CASP1	CHM-1	-0.0230067	0.578009	834
CASP1	SU11274	-0.0235559	0.599256	834
CASP1	bendamustine	-0.0236434	0.617389	834
CASP1	ouabain	-0.0254564	0.539319	834
CASP1	BRD-K61166597	-0.0254617	0.557054	834
CASP1	ETP-46464	-0.026966	0.661467	834
CASP1	UNC0638	-0.0269671	0.573067	834
CASP1	purmorphamine	-0.0276618	0.589183	834
CASP1	axitinib	-0.0284055	0.504413	834
CASP1	ABT-199	-0.0289369	0.64441	834
CASP1	tacrolimus	-0.0290198	0.540823	834
CASP1	PF-543	-0.029312	0.567834	834
CASP1	BRD-K66532283	-0.0297992	0.492342	834
CASP1	BRD-K99006945	-0.030027	0.709703	834
CASP1	dinaciclib	-0.0302421	0.625324	834
CASP1	tipifarnib-P1	-0.0308083	0.464441	834
CASP1	semagacestat	-0.0312161	0.845845	834
CASP1	masitinib	-0.0312551	0.49043	834
CASP1	CAY10594	-0.0316399	0.625552	834
CASP1	apicidin	-0.0323456	0.423393	834
CASP1	rigosertib	-0.0323659	0.441451	834
CASP1	salermide	-0.0324899	0.770683	834
CASP1	imatinib	-0.0327927	0.478716	834
CASP1	BRD-K48477130	-0.0333532	0.879393	834
CASP1	BRD-A94377914	-0.0333826	0.591412	834
CASP1	BRD-K30019337	-0.0338715	0.928592	834
CASP1	BRD-A02303741	-0.0341442	0.559673	834
CASP1	dabrafenib	-0.0341778	0.690613	834
CASP1	LY-2183240	-0.0345212	0.388225	834
CASP1	GDC-0879	-0.0347965	0.55923	834
CASP1	RITA	-0.0348973	0.438185	834
CASP1	NVP-TAE684	-0.0350197	0.499178	834
CASP1	968	-0.0352386	0.992793	834
CASP1	LY-2157299	-0.0355075	0.904695	834
CASP1	trifluoperazine	-0.0357298	0.526584	834
CASP1	BRD-K49290616	-0.0361564	0.944828	834
CASP1	afatinib	-0.0361623	0.480658	834
CASP1	SID 26681509	-0.0369806	0.452678	834
CASP1	bardoxolone methyl	-0.0373544	0.403306	834
CASP1	PL-DI	-0.03844	0.345567	834
CASP1	WAY-362450	-0.0393777	0.998521	834
CASP1	pitstop2	-0.0396465	0.843292	834
CASP1	elocalcitol	-0.0401732	0.325106	834
CASP1	HLI 373	-0.0406487	0.360813	834
CASP1	epigallocatechin-3-monogallate	-0.0408876	0.402438	834
CASP1	JQ-1	-0.0411684	0.303563	834
CASP1	BRD-K96431673	-0.0412626	0.994886	834
CASP1	itraconazole	-0.041343	0.57844	834
CASP1	zebularine	-0.0415219	0.322746	834
CASP1	SB-743921	-0.0429711	0.273724	834
CASP1	L-685458	-0.0430427	0.494997	834
CASP1	sirolimus	-0.0431053	0.301642	834
CASP1	foretinib	-0.0431311	0.342655	834
CASP1	cytochalasin B	-0.0437773	0.41924	834
CASP1	omacetaxine mepesuccinate	-0.0440275	0.360402	834
CASP1	GANT-61	-0.0440281	0.475169	834
CASP1	ML320	-0.0440889	0.36855	834
CASP1	barasertib	-0.0445288	0.285361	834
CASP1	blebbistatin	-0.04475	0.955373	834
CASP1	cabozantinib	-0.0448828	0.376579	834
CASP1	vincristine	-0.0455494	0.237052	834
CASP1	nintedanib	-0.0455587	0.418748	834
CASP1	pazopanib	-0.0458082	0.273285	834
CASP1	AZD4547	-0.0463049	0.34726	834
CASP1	SR-II-138A	-0.0464128	0.228723	834
CASP1	ML311	-0.0469636	0.235906	834
CASP1	PF-573228	-0.0470666	0.261114	834
CASP1	NVP-231	-0.0471554	0.24749	834
CASP1	MK-2206	-0.0473069	0.295402	834
CASP1	manumycin A	-0.0473516	0.234061	834
CASP1	alisertib	-0.0487054	0.232897	834
CASP1	Merck60	-0.0488583	0.219253	834
CASP1	BRD-K33199242	-0.0488603	0.948158	834
CASP1	cediranib	-0.0495673	0.707928	834
CASP1	FQI-2	-0.0508057	0.200121	834
CASP1	OSI-027	-0.0509592	0.252729	834
CASP1	GSK461364	-0.0514999	0.195133	834
CASP1	methotrexate	-0.0516531	0.22477	834
CASP1	vorapaxar	-0.0523685	0.278954	834
CASP1	AZ-3146	-0.0526365	0.227232	834
CASP1	BRD-K70511574	-0.052659	0.187084	834
CASP1	BRD-A71883111	-0.0527801	0.241772	834
CASP1	nakiterpiosin	-0.0531073	0.186191	834
CASP1	I-BET151	-0.0541001	0.164976	834
CASP1	silmitasertib	-0.054157	0.514045	834
CASP1	CD-437	-0.0544301	0.174768	834
CASP1	triptolide	-0.0546155	0.179941	834
CASP1	BRD-K78574327	-0.0546732	0.970056	834
CASP1	LRRK2-IN-1	-0.0547734	0.251362	834
CASP1	CIL55	-0.0553438	0.818096	834
CASP1	BMS-345541	-0.0555606	0.169461	834
CASP1	fulvestrant	-0.0565021	0.895067	834
CASP1	myriocin	-0.0565783	0.906857	834
CASP1	BRD-K52037352	-0.0566627	0.379233	834
CASP1	PLX-4720	-0.0572635	0.412584	834
CASP1	HC-067047	-0.0574192	0.340835	834
CASP1	BRD-K50799972	-0.05855	0.392329	834
CASP1	BRD-K29313308	-0.060295	0.166833	834
CASP1	erlotinib	-0.0603582	0.187246	834
CASP1	CR-1-31B	-0.0609266	0.112205	834
CASP1	CIL55A	-0.0609389	0.336117	834
CASP1	YK 4-279	-0.0624441	0.111872	834
CASP1	crizotinib	-0.0626264	0.120717	834
CASP1	SKI-II	-0.0629985	0.164202	834
CASP1	BRD-K96970199	-0.0633324	0.998764	834
CASP1	MGCD-265	-0.0640233	0.11005	834
CASP1	FGIN-1-27	-0.0640565	0.639487	834
CASP1	SN-38	-0.0643613	0.159692	834
CASP1	ZSTK474	-0.0643731	0.22663	834
CASP1	IPR-456	-0.0648647	0.604892	834
CASP1	parbendazole	-0.0649138	0.0902219	834
CASP1	Mdivi-1	-0.0650314	0.12791	834
CASP1	bexarotene	-0.0650753	0.137327	834
CASP1	tanespimycin	-0.0656562	0.203121	834
CASP1	BRD-K86535717	-0.0667786	0.838941	834
CASP1	lapatinib	-0.0671103	0.137004	834
CASP1	3-Cl-AHPC	-0.0673374	0.08977	834
CASP1	MK-1775	-0.06815	0.0894864	834
CASP1	PHA-793887	-0.0687291	0.0747349	834
CASP1	simvastatin	-0.0688923	0.222582	834
CASP1	GW-843682X	-0.0707441	0.090383	834
CASP1	BMS-270394	-0.0709569	0.117582	834
CASP1	triazolothiadiazine	-0.0711717	0.0621995	834
CASP1	vemurafenib	-0.0714478	0.181143	834
CASP1	R428	-0.0715313	0.169375	834
CASP1	teniposide	-0.0720305	0.199734	834
CASP1	O-6-benzylguanine	-0.0726204	0.560854	834
CASP1	narciclasine	-0.0730341	0.0630432	834
CASP1	darinaparsin	-0.073542	0.268002	834
CASP1	AT13387	-0.0756235	0.210834	834
CASP1	CAY10576	-0.076288	0.261994	834
CASP1	tosedostat	-0.0767273	0.0744048	834
CASP1	BMS-536924	-0.0771654	0.126252	834
CASP1	ciclosporin	-0.0771879	0.140599	834
CASP1	topotecan	-0.0779496	0.0425686	834
CASP1	ML312	-0.0785297	0.962086	834
CASP1	GSK-3 inhibitor IX	-0.0789647	0.0636027	834
CASP1	fluvastatin	-0.0797077	0.110186	834
CASP1	KW-2449	-0.0798495	0.0406389	834
CASP1	NVP-BSK805	-0.0800629	0.0467369	834
CASP1	TPCA-1	-0.0802252	0.0449782	834
CASP1	saracatinib	-0.0803252	0.0795147	834
CASP1	neratinib	-0.0805423	0.0600929	834
CASP1	BRD-K44224150	-0.0816258	0.975657	834
CASP1	KU-55933	-0.0816425	0.056876	834
CASP1	canertinib	-0.081832	0.0697134	834
CASP1	tigecycline	-0.0819634	0.182553	834
CASP1	NSC632839	-0.0827156	0.0335573	834
CASP1	RAF265	-0.0832184	0.11757	834
CASP1	gemcitabine	-0.0841649	0.0384527	834
CASP1	GDC-0941	-0.0852132	0.0521144	834
CASP1	BRD9647	-0.085393	0.0777749	834
CASP1	DNMDP	-0.0856528	0.19472	834
CASP1	tretinoin	-0.0859787	0.0372078	834
CASP1	CCT036477	-0.0860519	0.0299614	834
CASP1	VER-155008	-0.0862495	0.0387122	834
CASP1	PD 153035	-0.0866363	0.121704	834
CASP1	CD-1530	-0.0867486	0.0927191	834
CASP1	tubastatin A	-0.0868213	0.162667	834
CASP1	GSK525762A	-0.0876179	0.0225434	834
CASP1	dexamethasone	-0.0878832	0.0366535	834
CASP1	avicin D	-0.0883934	0.29338	834
CASP1	N9-isopropylolomoucine	-0.089633	0.0284255	834
CASP1	paclitaxel	-0.0897719	0.0219285	834
CASP1	fluorouracil	-0.0902592	0.0204701	834
CASP1	KU 0060648	-0.090687	0.025226	834
CASP1	CHIR-99021	-0.0911795	0.0288985	834
CASP1	palmostatin B	-0.0912129	0.357647	834
CASP1	curcumin	-0.0915136	0.0190165	834
CASP1	BRD-K41334119	-0.0936503	0.866353	834
CASP1	doxorubicin	-0.0940267	0.0127711	834
CASP1	etoposide	-0.0940393	0.0143544	834
CASP1	AT7867	-0.0943895	0.0205013	834
CASP1	NSC48300	-0.0953832	0.0146476	834
CASP1	TG-101348	-0.0955874	0.0177085	834
CASP1	pevonedistat	-0.0958035	0.0166407	834
CASP1	PF-184	-0.0964835	0.0148405	834
CASP1	vandetanib	-0.0966732	0.040255	834
CASP1	decitabine	-0.0971597	0.0106321	834
CASP1	LE-135	-0.0996542	0.0195354	834
CASP1	PD318088	-0.0998074	0.0234964	834
CASP1	BRD-A05715709	-0.100042	0.491889	834
CASP1	TGX-221	-0.100666	0.0863942	834
CASP1	bortezomib	-0.100706	0.0110356	834
CASP1	NSC23766	-0.102005	0.0114666	834
CASP1	pyrazolanthrone	-0.103771	0.0226548	834
CASP1	chlorambucil	-0.104253	0.00784769	834
CASP1	CIL56	-0.104745	0.0811991	834
CASP1	BRD-K84807411	-0.105882	0.667191	834
CASP1	FQI-1	-0.106085	0.0586444	834
CASP1	PRIMA-1-Met	-0.107398	0.111348	834
CASP1	AM-580	-0.109004	0.021695	834
CASP1	BRD-K66453893	-0.110024	0.00401523	834
CASP1	selumetinib	-0.111788	0.011957	834
CASP1	docetaxel	-0.118922	0.0476508	834
CASP1	tipifarnib-P2	-0.119206	0.0305573	834
CASP1	MLN2238	-0.120584	0.00189156	834
CASP1	sunitinib	-0.120703	0.00227237	834
CASP1	clofarabine	-0.121205	0.00122581	834
CASP1	BRD-K55116708	-0.121488	0.00446362	834
CASP1	leptomycin B	-0.123159	0.00095404	834
CASP1	birinapant	-0.125316	0.0209474	834
CASP1	dacarbazine	-0.126614	0.00102902	834
CASP1	gefitinib	-0.127096	0.0041544	834
CASP1	temsirolimus	-0.12787	0.0322582	834
CASP1	momelotinib	-0.127899	0.00143053	834
CASP1	trametinib	-0.128695	0.0630306	834
CASP1	tamatinib	-0.132621	0.0301296	834
CASP1	lovastatin	-0.136524	0.00187199	834
CASP1	AZD6482	-0.136937	0.00427532	834
CASP1	pluripotin	-0.140542	0.00123126	834
CASP1	BRD-K63431240	-0.142002	0.000463695	834
CASP1	PIK-93	-0.142462	0.000377044	834
CASP1	SNS-032	-0.142767	0.000408046	834
CASP1	AZD7762	-0.143718	0.000146922	834
CASP1	SNX-2112	-0.144253	0.000107517	834
CASP1	Ch-55	-0.14463	0.000812835	834
CASP1	BRD-K27224038	-0.149374	0.467413	834
CASP1	fumonisin B1	-0.153329	0.00121639	834
CASP1	BRD-K29086754	-0.157629	0.334027	834
CASP1	IC-87114	-0.160651	0.00152122	834
CASP1	dasatinib	-0.1608	8.7833e-05	834
CASP1	bosutinib	-0.164656	3.2601e-05	834
CASP1	BRD-K30748066	-0.169336	0.340665	834
CASP1	CAL-101	-0.169807	0.000318762	834
CASP1	ruxolitinib	-0.173919	1.0497e-05	834
CASP1	bleomycin A2	-0.176213	0.000155491	834
CASP1	tozasertib	-0.219209	0.174867	834
CASP1	staurosporine	-0.237255	0.0132754	834
CASP3	JW-55	0.21213	0.0819596	836
CASP3	FGIN-1-27	0.205602	0.0654506	836
CASP3	abiraterone	0.190632	0.106898	836
CASP3	BRD-K17060750	0.156894	0.000663241	836
CASP3	BRD-K78574327	0.147396	0.948504	836
CASP3	KH-CB19	0.136825	0.236258	836
CASP3	VAF-347	0.132903	0.02241	836
CASP3	BRD-K49290616	0.131487	0.698416	836
CASP3	BRD-K96431673	0.129365	0.985799	836
CASP3	SR8278	0.117218	0.731072	836
CASP3	BRD-K02492147	0.103219	0.0629951	836
CASP3	BRD-K86535717	0.0995648	0.743153	836
CASP3	vandetanib	0.0927531	0.0503374	836
CASP3	BRD-K34099515	0.091929	0.89134	836
CASP3	BRD-K16147474	0.0859557	0.853361	836
CASP3	BRD-K09587429	0.0769597	0.213529	836
CASP3	PD318088	0.0757437	0.0995744	836
CASP3	BCL-LZH-4	0.0743021	0.699061	836
CASP3	BRD-K75293299	0.0735314	0.779739	836
CASP3	BRD-K30019337	0.0732429	0.796593	836
CASP3	MK-0752	0.0728499	0.292587	836
CASP3	erlotinib	0.0722737	0.104785	836
CASP3	myriocin	0.0717724	0.88392	836
CASP3	GSK2636771	0.0695478	0.445204	836
CASP3	selumetinib	0.069216	0.150197	836
CASP3	NSC30930	0.0679489	0.303207	836
CASP3	austocystin D	0.0677091	0.151828	836
CASP3	BRD8899	0.0659499	0.513874	836
CASP3	ML334 diastereomer	0.0612539	0.389839	836
CASP3	AGK-2	0.0610516	0.874136	836
CASP3	trametinib	0.0584907	0.470857	836
CASP3	MI-1	0.0571678	0.476881	836
CASP3	PD 153035	0.0568557	0.345013	836
CASP3	LY-2157299	0.0567993	0.828161	836
CASP3	SZ4TA2	0.0554267	0.642505	836
CASP3	erismodegib	0.0521933	0.498974	836
CASP3	semagacestat	0.052064	0.690341	836
CASP3	hyperforin	0.0505811	0.548696	836
CASP3	SGX-523	0.049615	0.406021	836
CASP3	ML083	0.0468181	0.6954	836
CASP3	saracatinib	0.046704	0.353232	836
CASP3	SB-431542	0.0455031	0.652669	836
CASP3	IPR-456	0.0445757	0.757657	836
CASP3	betulinic acid	0.0445318	0.78925	836
CASP3	CAY10576	0.0431504	0.563812	836
CASP3	FSC231	0.0422095	0.99945	836
CASP3	BRD-K33199242	0.0417841	0.948158	836
CASP3	BRD-K41334119	0.0399035	0.955092	836
CASP3	C6-ceramide	0.037802	0.747152	836
CASP3	BRD-K96970199	0.0363524	0.998764	836
CASP3	AC55649	0.0344775	0.799369	836
CASP3	ML312	0.0344662	0.989661	836
CASP3	BRD-K64610608	0.033854	0.785862	836
CASP3	A-804598	0.0332693	0.857426	836
CASP3	BRD-K09344309	0.0331684	0.967791	836
CASP3	CID-5951923	0.0301864	0.75056	836
CASP3	BRD-K48477130	0.0265724	0.905884	836
CASP3	sitagliptin	0.0223409	0.997718	836
CASP3	BRD-K99006945	0.0221119	0.787922	836
CASP3	dasatinib	0.0173807	0.763925	836
CASP3	BRD-K84807411	0.0171987	0.962993	836
CASP3	ifosfamide	0.0166621	0.947503	836
CASP3	CI-976	0.0163242	0.935683	836
CASP3	PF-4800567 hydrochloride	0.0155975	0.999586	836
CASP3	vemurafenib	0.0149249	0.829077	836
CASP3	afatinib	0.0147999	0.791447	836
CASP3	ibrutinib	0.0142085	0.841104	836
CASP3	gefitinib	0.0138007	0.834302	836
CASP3	968	0.0131689	0.99849	836
CASP3	EX-527	0.0130405	0.934048	836
CASP3	etomoxir	0.0109594	0.989655	836
CASP3	PRL-3 inhibitor I	0.00967893	0.957643	836
CASP3	simvastatin	0.00872375	0.908715	836
CASP3	lapatinib	0.00750336	0.890067	836
CASP3	BRD-K27224038	0.00576431	0.987331	836
CASP3	istradefylline	0.00515199	0.981462	836
CASP3	BRD-K04800985	0.00310114	0.999785	836
CASP3	BRD8958	0.00190736	0.997944	836
CASP3	BRD-K34485477	0.00158817	0.999899	836
CASP3	UNC0321	-0.00355599	0.983398	836
CASP3	pitstop2	-0.00401259	0.988736	836
CASP3	VU0155056	-0.00426829	0.996039	836
CASP3	WAY-362450	-0.00520805	0.998521	836
CASP3	cyclophosphamide	-0.00667613	0.999427	836
CASP3	cimetidine	-0.00900469	0.99519	836
CASP3	nelarabine	-0.0101011	0.982359	836
CASP3	fulvestrant	-0.0105249	0.983914	836
CASP3	JW-480	-0.0106348	0.960679	836
CASP3	MLN2480	-0.011372	0.940549	836
CASP3	BRD-K90370028	-0.012889	0.980391	836
CASP3	lomeguatrib	-0.013612	0.839924	836
CASP3	GSK1059615	-0.0149063	0.969933	836
CASP3	PLX-4720	-0.0154451	0.869696	836
CASP3	veliparib	-0.0155704	0.876625	836
CASP3	blebbistatin	-0.0171958	0.984351	836
CASP3	BEC	-0.0175028	0.999979	836
CASP3	lovastatin	-0.0178251	0.770536	836
CASP3	BRD-K29086754	-0.0182555	0.95774	836
CASP3	GDC-0879	-0.0195648	0.769135	836
CASP3	ML203	-0.0198995	0.73975	836
CASP3	procarbazine	-0.0209454	0.930852	836
CASP3	BYL-719	-0.0209637	0.805102	836
CASP3	TGX-221	-0.0217341	0.814182	836
CASP3	CBB-1007	-0.0221712	0.924663	836
CASP3	BRD-K71781559	-0.0222985	0.993922	836
CASP3	ML258	-0.0245202	0.836714	836
CASP3	BRD-K37390332	-0.0249679	0.936572	836
CASP3	thalidomide	-0.0254149	0.920723	836
CASP3	DNMDP	-0.0268811	0.738196	836
CASP3	isonicotinohydroxamic acid	-0.0269033	0.992739	836
CASP3	fluvastatin	-0.0279966	0.64063	836
CASP3	sildenafil	-0.0297416	0.825005	836
CASP3	BRD-A05715709	-0.0299654	0.858395	836
CASP3	pandacostat	-0.031891	0.519081	836
CASP3	JW-74	-0.0352756	0.719351	836
CASP3	HC-067047	-0.0377047	0.56385	836
CASP3	palmostatin B	-0.040222	0.74272	836
CASP3	BRD-K50799972	-0.0407093	0.585874	836
CASP3	IC-87114	-0.0421161	0.544793	836
CASP3	BRD-K44224150	-0.0437256	0.994574	836
CASP3	birinapant	-0.0440894	0.511296	836
CASP3	myricetin	-0.0451118	0.682738	836
CASP3	nilotinib	-0.0454532	0.57237	836
CASP3	SR1001	-0.0456492	0.52742	836
CASP3	BRD4132	-0.0466724	0.472501	836
CASP3	ML006	-0.0510003	0.343205	836
CASP3	importazole	-0.0523457	0.406251	836
CASP3	CAL-101	-0.0529627	0.382106	836
CASP3	niclosamide	-0.0531207	0.243008	836
CASP3	bexarotene	-0.0549556	0.216518	836
CASP3	tamatinib	-0.0552465	0.486058	836
CASP3	SB-525334	-0.0564403	0.274939	836
CASP3	BRD-K52037352	-0.056798	0.378353	836
CASP3	tamoxifen	-0.0603545	0.346141	836
CASP3	salermide	-0.0614158	0.518335	836
CASP3	CD-1530	-0.0622834	0.24752	836
CASP3	Compound 1541A	-0.0626241	0.296394	836
CASP3	SJ-172550	-0.0626686	0.54455	836
CASP3	spautin-1	-0.0629855	0.192898	836
CASP3	linsitinib	-0.0650588	0.138779	836
CASP3	WZ8040	-0.0662264	0.194115	836
CASP3	pifithrin-alpha	-0.0670711	0.241948	836
CASP3	Ch-55	-0.0673934	0.157367	836
CASP3	silmitasertib	-0.0674394	0.398742	836
CASP3	parthenolide	-0.0676031	0.22348	836
CASP3	canertinib	-0.0683402	0.138699	836
CASP3	BRD1378	-0.0687578	0.442085	836
CASP3	MI-2	-0.0713014	0.299067	836
CASP3	CAY10594	-0.0716829	0.202098	836
CASP3	WZ4002	-0.0722735	0.288952	836
CASP3	BRD-K42260513	-0.0723493	0.97451	836
CASP3	AM-580	-0.0730149	0.143198	836
CASP3	YM-155	-0.0746121	0.115303	836
CASP3	BRD5468	-0.0753017	0.306269	836
CASP3	BMS-536924	-0.0757234	0.134589	836
CASP3	CIL55	-0.0761014	0.730511	836
CASP3	BRD-A71883111	-0.0773737	0.0735767	836
CASP3	NPC-26	-0.0784872	0.4362	836
CASP3	AZD6482	-0.0786729	0.141449	836
CASP3	BRD-K14844214	-0.0800654	0.208842	836
CASP3	fumonisin B1	-0.0802965	0.130438	836
CASP3	L-685458	-0.0806242	0.144611	836
CASP3	O-6-benzylguanine	-0.081614	0.498836	836
CASP3	neratinib	-0.0822161	0.0545698	836
CASP3	BMS-270394	-0.082871	0.0625291	836
CASP3	PYR-41	-0.083795	0.100981	836
CASP3	ZSTK474	-0.0862208	0.0916133	836
CASP3	BIBR-1532	-0.0869236	0.0514533	836
CASP3	necrostatin-7	-0.0870209	0.0484165	836
CASP3	trifluoperazine	-0.0870236	0.0713586	836
CASP3	NSC 74859	-0.0871539	0.076059	836
CASP3	temozolomide	-0.0873807	0.142439	836
CASP3	bafilomycin A1	-0.0876971	0.882618	836
CASP3	necrostatin-1	-0.0878112	0.0539242	836
CASP3	GSK4112	-0.0918847	0.0477388	836
CASP3	azacitidine	-0.0919373	0.0477734	836
CASP3	BMS-195614	-0.0929022	0.0971369	836
CASP3	cytochalasin B	-0.0929619	0.0523962	836
CASP3	dabrafenib	-0.0930742	0.204643	836
CASP3	XL765	-0.0935394	0.0720439	836
CASP3	tivozanib	-0.0941969	0.0394393	836
CASP3	purmorphamine	-0.0968079	0.035664	836
CASP3	16-beta-bromoandrosterone	-0.0976131	0.0347816	836
CASP3	BRD-M00053801	-0.0978337	0.26889	836
CASP3	BRD-K85133207	-0.0988887	0.0213181	836
CASP3	ABT-199	-0.099293	0.0704768	836
CASP3	BRD9876	-0.100627	0.0792946	836
CASP3	RO4929097	-0.101295	0.173147	836
CASP3	IU1	-0.101899	0.208894	836
CASP3	BRD1835	-0.102912	0.023783	836
CASP3	PF-750	-0.105313	0.0206746	836
CASP3	GANT-61	-0.106501	0.0404904	836
CASP3	BRD-K02251932	-0.106708	0.0246371	836
CASP3	sorafenib	-0.107053	0.0113345	836
CASP3	BRD-K19103580	-0.107398	0.0199497	836
CASP3	quizartinib	-0.107849	0.0422171	836
CASP3	pyrazolanthrone	-0.108135	0.0169599	836
CASP3	BRD-A02303741	-0.108983	0.0297135	836
CASP3	itraconazole	-0.109292	0.0740553	836
CASP3	ciclosporin	-0.109548	0.0278589	836
CASP3	cyanoquinoline 11	-0.109807	0.169997	836
CASP3	cediranib	-0.10987	0.281758	836
CASP3	ML029	-0.11113	0.00927103	836
CASP3	prochlorperazine	-0.111442	0.00958337	836
CASP3	NVP-ADW742	-0.111924	0.00833176	836
CASP3	bleomycin A2	-0.114392	0.0199121	836
CASP3	KU-55933	-0.116142	0.00539856	836
CASP3	BRD-K33514849	-0.11642	0.999288	836
CASP3	SCH-529074	-0.117499	0.00829925	836
CASP3	VER-155008	-0.118472	0.00377961	836
CASP3	Mdivi-1	-0.119489	0.00342292	836
CASP3	vorapaxar	-0.120232	0.00628333	836
CASP3	BRD-K45681478	-0.12271	0.00407568	836
CASP3	BRD-K24690302	-0.123788	0.00253176	836
CASP3	pluripotin	-0.124083	0.00481951	836
CASP3	BRD6340	-0.124552	0.00154104	836
CASP3	BRD-K55116708	-0.12571	0.00317625	836
CASP3	PDMP	-0.126664	0.00212984	836
CASP3	SKI-II	-0.127056	0.00253029	836
CASP3	NVP-TAE684	-0.127367	0.00329388	836
CASP3	BIRB-796	-0.127994	0.0030238	836
CASP3	TG-100-115	-0.12804	0.005405	836
CASP3	GDC-0941	-0.128538	0.00233631	836
CASP3	BRD-K27986637	-0.129581	0.358367	836
CASP3	BRD-K01737880	-0.129598	0.53276	836
CASP3	BRD-K13999467	-0.12967	0.00163235	836
CASP3	staurosporine	-0.131348	0.254304	836
CASP3	AT-406	-0.132248	0.145286	836
CASP3	PRIMA-1-Met	-0.13302	0.0420667	836
CASP3	ML239	-0.133335	0.000978616	836
CASP3	BMS-754807	-0.133635	0.0012795	836
CASP3	HBX-41108	-0.134146	0.00922511	836
CASP3	ML050	-0.134543	0.00106007	836
CASP3	tanespimycin	-0.134799	0.00476198	836
CASP3	Repligen 136	-0.136289	0.00102258	836
CASP3	RAF265	-0.136628	0.00636338	836
CASP3	BRD-K28456706	-0.136955	0.000683029	836
CASP3	QS-11	-0.137882	0.553227	836
CASP3	TW-37	-0.138742	0.000470275	836
CASP3	dexamethasone	-0.138784	0.000793198	836
CASP3	RG-108	-0.13919	0.000773663	836
CASP3	bosutinib	-0.139305	0.000490109	836
CASP3	regorafenib	-0.139698	0.00240293	836
CASP3	daporinad	-0.141195	0.000967865	836
CASP3	tretinoin	-0.142069	0.000357633	836
CASP3	BRD-K30748066	-0.145025	0.425403	836
CASP3	darinaparsin	-0.145108	0.0162097	836
CASP3	CAY10618	-0.145658	0.000146897	836
CASP3	CIL41	-0.145665	0.024735	836
CASP3	brefeldin A	-0.145969	0.000559838	836
CASP3	nintedanib	-0.146167	0.00207519	836
CASP3	skepinone-L	-0.146858	0.0156037	836
CASP3	cabozantinib	-0.147212	0.000805522	836
CASP3	BRD-K48334597	-0.147665	0.159743	836
CASP3	BRD9647	-0.148225	0.00115398	836
CASP3	ETP-46464	-0.148628	0.00304855	836
CASP3	ML162	-0.148784	0.000173317	836
CASP3	BRD-K29313308	-0.1498	0.000229743	836
CASP3	tandutinib	-0.150956	0.000280983	836
CASP3	STF-31	-0.151535	0.000110525	836
CASP3	BRD-K51831558	-0.152419	0.0237192	836
CASP3	DBeQ	-0.153606	0.000211305	836
CASP3	BRD-K41597374	-0.155927	5.9857e-05	836
CASP3	AZD7545	-0.155991	0.000139883	836
CASP3	BRD-K63431240	-0.156271	0.000107795	836
CASP3	lenvatinib	-0.156445	0.000123539	836
CASP3	StemRegenin 1	-0.157112	5.8413e-05	836
CASP3	methotrexate	-0.158115	8.5397e-05	836
CASP3	BRD-K51490254	-0.159026	0.000107338	836
CASP3	GMX-1778	-0.159755	4.307e-05	836
CASP3	phloretin	-0.160195	3.0668e-05	836
CASP3	PF-543	-0.1602	0.000225434	836
CASP3	NSC19630	-0.162167	0.000506119	836
CASP3	1S,3R-RSL-3	-0.162611	2.5909e-05	836
CASP3	AA-COCF3	-0.162706	5.8144e-05	836
CASP3	tipifarnib-P1	-0.163478	2.3627e-05	836
CASP3	AZ-3146	-0.163629	3.8452e-05	836
CASP3	Ko-143	-0.164922	2.1765e-05	836
CASP3	LE-135	-0.165257	7.2644e-05	836
CASP3	erastin	-0.166648	2.9775e-05	836
CASP3	BRD-K11533227	-0.166827	6.0455e-05	836
CASP3	BRD-K88742110	-0.169596	2.0412e-05	836
CASP3	SU11274	-0.17006	1.3989e-05	836
CASP3	belinostat	-0.171034	0.00185414	836
CASP3	SRT-1720	-0.171311	4.1774e-05	836
CASP3	BRD-K92856060	-0.172527	1.425e-05	836
CASP3	avicin D	-0.17268	0.0191269	836
CASP3	ML320	-0.174844	3.9007e-05	836
CASP3	navitoclax	-0.175184	1.0198e-05	836
CASP3	marinopyrrole A	-0.175241	0.000367935	836
CASP3	KU-0063794	-0.175366	9.70779e-06	836
CASP3	linifanib	-0.175904	3.28159e-06	836
CASP3	brivanib	-0.176478	7.54748e-06	836
CASP3	oligomycin A	-0.176561	5.2734e-06	836
CASP3	KU 0060648	-0.17674	5.38183e-06	836
CASP3	PI-103	-0.177132	6.9392e-06	836
CASP3	KHS101	-0.177305	1.16e-05	836
CASP3	OSI-027	-0.179395	7.16166e-06	836
CASP3	neuronal differentiation inducer III	-0.180315	1.76477e-06	836
CASP3	gossypol	-0.180701	3.97361e-06	836
CASP3	foretinib	-0.183067	3.6486e-06	836
CASP3	ABT-737	-0.183373	9.25447e-06	836
CASP3	UNC0638	-0.183545	4.37448e-06	836
CASP3	PAC-1	-0.183725	2.12331e-06	836
CASP3	N9-isopropylolomoucine	-0.184194	3.02808e-06	836
CASP3	BRD-A86708339	-0.184862	0.00144947	836
CASP3	masitinib	-0.186365	2.37196e-06	836
CASP3	SID 26681509	-0.187131	9.04564e-06	836
CASP3	imatinib	-0.18766	3.28956e-06	836
CASP3	bendamustine	-0.18799	4.90754e-06	836
CASP3	avrainvillamide	-0.188052	4.8573e-05	836
CASP3	fluorouracil	-0.188349	6.41401e-07	836
CASP3	valdecoxib	-0.188688	1.28926e-06	836
CASP3	tacrolimus	-0.188762	2.73956e-06	836
CASP3	tubastatin A	-0.188785	0.00104762	836
CASP3	MK-2206	-0.188859	4.09147e-06	836
CASP3	BRD-K35604418	-0.189135	8.72935e-07	836
CASP3	BRD-K97651142	-0.189575	2.07603e-06	836
CASP3	Ki8751	-0.19059	2.38261e-06	836
CASP3	olaparib	-0.192001	4.74454e-07	836
CASP3	AZD4547	-0.19339	4.19264e-06	836
CASP3	KU-60019	-0.194102	3.15418e-07	836
CASP3	SNS-032	-0.194614	1.00435e-06	836
CASP3	tozasertib	-0.195097	0.237253	836
CASP3	GW-843682X	-0.196044	5.77644e-07	836
CASP3	obatoclax	-0.196612	1.50939e-07	836
CASP3	GW-405833	-0.196881	1.65739e-07	836
CASP3	GSK-3 inhibitor IX	-0.197092	1.05021e-06	836
CASP3	PF-3758309	-0.197126	0.000329099	836
CASP3	GSK-J4	-0.199038	0.20589	836
CASP3	vorinostat	-0.200617	8.55769e-08	836
CASP3	ML210	-0.200651	2.50918e-07	836
CASP3	WP1130	-0.200887	2.0863e-07	836
CASP3	NSC23766	-0.20116	2.19281e-07	836
CASP3	MST-312	-0.201234	1.00561e-07	836
CASP3	epigallocatechin-3-monogallate	-0.202924	1.2421e-06	836
CASP3	Bax channel blocker	-0.202963	9.31176e-07	836
CASP3	SCH-79797	-0.202989	6.71128e-08	836
CASP3	BMS-345541	-0.203251	1.05711e-07	836
CASP3	tacedinaline	-0.20346	6.01645e-06	836
CASP3	ISOX	-0.203821	4.93109e-08	836
CASP3	MG-132	-0.203969	0.0055586	836
CASP3	AZD8055	-0.204168	1.44517e-07	836
CASP3	dacarbazine	-0.204268	6.61719e-08	836
CASP3	sirolimus	-0.204395	7.89499e-08	836
CASP3	JQ-1	-0.205126	2.95835e-08	836
CASP3	PIK-93	-0.206717	1.4641e-07	836
CASP3	alvocidib	-0.206922	0.000231767	836
CASP3	ML031	-0.207244	5.62153e-07	836
CASP3	tosedostat	-0.207397	2.30266e-07	836
CASP3	COL-3	-0.207932	2.86349e-06	836
CASP3	RITA	-0.210273	8.2137e-08	836
CASP3	MGCD-265	-0.213963	1.44749e-08	836
CASP3	OSI-930	-0.214236	3.4243e-07	836
CASP3	entinostat	-0.215417	9.53421e-09	836
CASP3	dinaciclib	-0.215672	8.8258e-05	836
CASP3	GSK525762A	-0.21606	4.98559e-09	836
CASP3	BRD-K80183349	-0.216097	1.26748e-08	836
CASP3	pazopanib	-0.216393	1.28509e-08	836
CASP3	ruxolitinib	-0.216687	3.19511e-08	836
CASP3	3-Cl-AHPC	-0.217717	5.27513e-09	836
CASP3	NVP-BEZ235	-0.218015	4.01833e-06	836
CASP3	ouabain	-0.218666	3.64215e-09	836
CASP3	zebularine	-0.218766	1.08995e-08	836
CASP3	SN-38	-0.219791	1.24231e-07	836
CASP3	apicidin	-0.219831	2.10066e-09	836
CASP3	HLI 373	-0.221755	1.36618e-08	836
CASP3	Merck60	-0.222194	1.73366e-09	836
CASP3	sunitinib	-0.222253	5.95893e-09	836
CASP3	CHIR-99021	-0.222892	1.89728e-08	836
CASP3	B02	-0.224132	7.2348e-09	836
CASP3	PF-573228	-0.224236	2.81646e-09	836
CASP3	temsirolimus	-0.224874	8.1221e-05	836
CASP3	barasertib	-0.224972	2.10972e-09	836
CASP3	BRD-K61166597	-0.225018	5.64225e-09	836
CASP3	TPCA-1	-0.22592	1.66836e-09	836
CASP3	alisertib	-0.226209	1.38762e-09	836
CASP3	CIL55A	-0.227132	6.5592e-05	836
CASP3	SMER-3	-0.227722	6.38417e-08	836
CASP3	QW-BI-011	-0.227995	0.00626684	836
CASP3	cucurbitacin I	-0.230052	2.28512e-09	836
CASP3	CIL56	-0.231021	5.1995e-05	836
CASP3	Compound 23 citrate	-0.231343	1.1278e-09	836
CASP3	momelotinib	-0.232467	2.7074e-09	836
CASP3	panobinostat	-0.233867	1.69053e-10	836
CASP3	pifithrin-mu	-0.235938	4.61539e-10	836
CASP3	I-BET151	-0.238836	6.28616e-11	836
CASP3	TG-101348	-0.239256	3.3811e-10	836
CASP3	Compound 7d-cis	-0.239488	4.67855e-09	836
CASP3	NVP-231	-0.240967	9.50155e-11	836
CASP3	fingolimod	-0.24149	1.97125e-10	836
CASP3	NSC48300	-0.242014	8.2096e-11	836
CASP3	sotrastaurin	-0.243365	5.37009e-08	836
CASP3	nutlin-3	-0.244301	1.70654e-10	836
CASP3	tigecycline	-0.246111	1.3921e-05	836
CASP3	BRD-K66532283	-0.246408	1.66615e-10	836
CASP3	cerulenin	-0.247247	3.28857e-11	836
CASP3	BIX-01294	-0.247544	3.61256e-11	836
CASP3	mitomycin	-0.248025	2.13237e-11	836
CASP3	R428	-0.248158	1.24933e-07	836
CASP3	MLN2238	-0.248567	4.44054e-11	836
CASP3	NVP-BSK805	-0.248952	4.25181e-11	836
CASP3	ceranib-2	-0.250324	6.32109e-12	836
CASP3	tipifarnib-P2	-0.251265	1.384e-06	836
CASP3	elocalcitol	-0.252218	2.40381e-11	836
CASP3	NSC95397	-0.252403	1.41672e-10	836
CASP3	BRD-K26531177	-0.253278	7.98696e-11	836
CASP3	ciclopirox	-0.253479	3.44805e-12	836
CASP3	PF-184	-0.253817	1.67002e-11	836
CASP3	CCT036477	-0.253949	9.37862e-12	836
CASP3	bardoxolone methyl	-0.255723	1.79426e-10	836
CASP3	omacetaxine mepesuccinate	-0.255977	5.24214e-09	836
CASP3	pevonedistat	-0.256177	1.58052e-11	836
CASP3	triptolide	-0.25703	8.90874e-12	836
CASP3	AZD1480	-0.259498	3.1105e-05	836
CASP3	isoevodiamine	-0.261341	1.04331e-12	836
CASP3	methylstat	-0.262176	6.90247e-09	836
CASP3	tivantinib	-0.263119	1.27459e-06	836
CASP3	PHA-793887	-0.26424	4.1307e-13	836
CASP3	axitinib	-0.264788	7.62365e-13	836
CASP3	crizotinib	-0.264939	1.08913e-12	836
CASP3	bortezomib	-0.265516	2.43941e-12	836
CASP3	serdemetan	-0.265557	5.0469e-12	836
CASP3	gemcitabine	-0.266954	3.5334e-12	836
CASP3	ELCPK	-0.26702	1.79474e-06	836
CASP3	KPT185	-0.267436	5.58545e-10	836
CASP3	AZD7762	-0.2691	2.52078e-13	836
CASP3	YK 4-279	-0.269734	1.42741e-13	836
CASP3	SB-225002	-0.270213	7.32151e-14	836
CASP3	CD-437	-0.271042	1.75467e-13	836
CASP3	paclitaxel	-0.272033	1.98232e-13	836
CASP3	BRD1812	-0.274166	4.83571e-13	836
CASP3	ML311	-0.274208	3.61872e-14	836
CASP3	CIL70	-0.274467	2.73739e-07	836
CASP3	FQI-2	-0.276875	2.26087e-14	836
CASP3	AT13387	-0.278145	6.6863e-07	836
CASP3	BRD-A94377914	-0.279484	1.04671e-07	836
CASP3	LRRK2-IN-1	-0.279734	1.74332e-10	836
CASP3	CR-1-31B	-0.281973	6.52886e-15	836
CASP3	MK-1775	-0.282713	3.06471e-14	836
CASP3	curcumin	-0.283207	1.8284e-14	836
CASP3	SR-II-138A	-0.288062	8.34055e-16	836
CASP3	decitabine	-0.289118	1.40308e-15	836
CASP3	leptomycin B	-0.29125	4.15891e-16	836
CASP3	isoliquiritigenin	-0.291725	0.000279698	836
CASP3	KW-2449	-0.291852	1.20389e-15	836
CASP3	AT7867	-0.293358	1.06506e-14	836
CASP3	CHM-1	-0.294926	5.12484e-16	836
CASP3	topotecan	-0.295662	2.14443e-16	836
CASP3	docetaxel	-0.295754	1.18909e-07	836
CASP3	FQI-1	-0.297716	1.11452e-08	836
CASP3	necrosulfonamide	-0.29799	2.84389e-11	836
CASP3	NSC632839	-0.299183	3.20463e-16	836
CASP3	nakiterpiosin	-0.299344	3.01567e-16	836
CASP3	manumycin A	-0.303132	1.04093e-16	836
CASP3	BRD-K66453893	-0.303843	9.01608e-17	836
CASP3	rigosertib	-0.309216	8.27691e-17	836
CASP3	BI-2536	-0.309871	3.74742e-18	836
CASP3	PRIMA-1	-0.31014	1.48609e-16	836
CASP3	indisulam	-0.311689	9.99887e-17	836
CASP3	BRD-K34222889	-0.311845	9.84701e-18	836
CASP3	BRD-K70511574	-0.312434	1.03429e-17	836
CASP3	SB-743921	-0.313113	1.81996e-18	836
CASP3	KX2-391	-0.313199	1.07757e-17	836
CASP3	narciclasine	-0.313334	1.7712e-17	836
CASP3	chlorambucil	-0.31855	6.92667e-18	836
CASP3	piperlongumine	-0.32219	4.63304e-19	836
CASP3	PX-12	-0.327457	2.67889e-19	836
CASP3	doxorubicin	-0.329958	1.81276e-20	836
CASP3	parbendazole	-0.33153	1.26062e-20	836
CASP3	vincristine	-0.334865	1.71707e-21	836
CASP3	clofarabine	-0.337785	3.21606e-21	836
CASP3	GSK461364	-0.340617	6.13598e-21	836
CASP3	etoposide	-0.340628	3.31365e-21	836
CASP3	neopeltolide	-0.34573	3.9101e-05	836
CASP3	SNX-2112	-0.34613	4.65768e-22	836
CASP3	cytarabine hydrochloride	-0.34892	1.96965e-22	836
CASP3	PL-DI	-0.349658	7.9661e-22	836
CASP3	triazolothiadiazine	-0.358067	4.36324e-24	836
CASP3	LY-2183240	-0.369859	4.12414e-25	836
CASP3	teniposide	-0.448137	2.08546e-19	836
CASP4	GSK-J4	0.310269	0.035224	837
CASP4	belinostat	0.266786	6.08289e-07	837
CASP4	tivantinib	0.247178	5.83222e-06	837
CASP4	marinopyrrole A	0.235589	1.10286e-06	837
CASP4	PRIMA-1	0.234321	8.38921e-10	837
CASP4	panobinostat	0.226669	6.4382e-10	837
CASP4	BRD-K35604418	0.225203	3.64469e-09	837
CASP4	SB-525334	0.218409	6.94415e-07	837
CASP4	BI-2536	0.211595	6.09511e-09	837
CASP4	MST-312	0.21111	2.18191e-08	837
CASP4	PX-12	0.210747	1.70506e-08	837
CASP4	PI-103	0.208626	8.67396e-08	837
CASP4	NSC19630	0.207595	6.16251e-06	837
CASP4	dinaciclib	0.206546	0.000179809	837
CASP4	NSC95397	0.203785	2.99055e-07	837
CASP4	omacetaxine mepesuccinate	0.200746	6.19628e-06	837
CASP4	tacedinaline	0.199347	9.49374e-06	837
CASP4	necrosulfonamide	0.198878	1.495e-05	837
CASP4	vorinostat	0.197773	1.3238e-07	837
CASP4	valdecoxib	0.195548	5.05805e-07	837
CASP4	phloretin	0.194816	3.13965e-07	837
CASP4	skepinone-L	0.194753	0.00108905	837
CASP4	SB-225002	0.19404	1.25804e-07	837
CASP4	methylstat	0.1934	2.7911e-05	837
CASP4	MI-2	0.192902	0.00205649	837
CASP4	piperlongumine	0.192449	2.1439e-07	837
CASP4	SB-743921	0.192143	1.53243e-07	837
CASP4	neuronal differentiation inducer III	0.191768	3.44821e-07	837
CASP4	CIL70	0.190423	0.00051431	837
CASP4	LY-2183240	0.189835	3.07331e-07	837
CASP4	vincristine	0.189524	1.68605e-07	837
CASP4	oligomycin A	0.189282	9.83732e-07	837
CASP4	BRD-K34222889	0.189188	4.04791e-07	837
CASP4	PAC-1	0.188279	1.14874e-06	837
CASP4	KX2-391	0.185627	7.83645e-07	837
CASP4	BRD-K34099515	0.185356	0.723372	837
CASP4	NVP-BEZ235	0.184315	0.000110998	837
CASP4	PF-3758309	0.182176	0.000954594	837
CASP4	ceranib-2	0.181929	8.92087e-07	837
CASP4	pifithrin-mu	0.181908	2.06164e-06	837
CASP4	BRD-K51490254	0.181174	8.97713e-06	837
CASP4	GSK461364	0.178593	1.98207e-06	837
CASP4	cerulenin	0.177193	2.85465e-06	837
CASP4	ISOX	0.176954	2.56125e-06	837
CASP4	MG-132	0.171409	0.0223046	837
CASP4	BRD-K26531177	0.17104	1.7141e-05	837
CASP4	isoevodiamine	0.16957	5.88563e-06	837
CASP4	BRD-A94377914	0.168681	0.00199043	837
CASP4	BRD-K24690302	0.168516	2.8917e-05	837
CASP4	KPT185	0.168004	0.000151652	837
CASP4	nutlin-3	0.167497	1.7349e-05	837
CASP4	ML031	0.166709	6.6001e-05	837
CASP4	ciclopirox	0.164321	9.44067e-06	837
CASP4	entinostat	0.163292	1.7372e-05	837
CASP4	Compound 7d-cis	0.163008	9.6055e-05	837
CASP4	GMX-1778	0.162734	3.0166e-05	837
CASP4	gossypol	0.161788	3.9322e-05	837
CASP4	BRD-K80183349	0.161319	2.8465e-05	837
CASP4	niclosamide	0.160335	7.6919e-05	837
CASP4	doxorubicin	0.160152	1.4178e-05	837
CASP4	B02	0.160084	4.6779e-05	837
CASP4	parbendazole	0.157678	1.9549e-05	837
CASP4	FQI-2	0.157135	2.5111e-05	837
CASP4	BRD-K97651142	0.157106	9.7462e-05	837
CASP4	brivanib	0.156163	7.8768e-05	837
CASP4	PYR-41	0.155103	0.00153314	837
CASP4	PF-750	0.154817	0.000485068	837
CASP4	BIX-01294	0.154558	5.3786e-05	837
CASP4	alvocidib	0.154357	0.00684419	837
CASP4	BRD1812	0.153992	8.0861e-05	837
CASP4	ML239	0.153904	0.00011633	837
CASP4	serdemetan	0.152693	0.000112798	837
CASP4	STF-31	0.152483	9.9468e-05	837
CASP4	daporinad	0.152138	0.000347863	837
CASP4	YK 4-279	0.152096	5.1523e-05	837
CASP4	DBeQ	0.151598	0.000258434	837
CASP4	obatoclax	0.151377	6.5227e-05	837
CASP4	LRRK2-IN-1	0.150299	0.000916987	837
CASP4	triazolothiadiazine	0.149386	5.3669e-05	837
CASP4	ouabain	0.149044	7.5274e-05	837
CASP4	ELCPK	0.148376	0.0112909	837
CASP4	CAY10618	0.148046	0.000112188	837
CASP4	tubastatin A	0.147497	0.0122097	837
CASP4	ML029	0.146915	0.000441743	837
CASP4	PL-DI	0.146479	0.000122966	837
CASP4	axitinib	0.146129	0.000126509	837
CASP4	sorafenib	0.145569	0.000456036	837
CASP4	ML050	0.144899	0.000398137	837
CASP4	BRD-A86708339	0.143922	0.0146907	837
CASP4	cucurbitacin I	0.143879	0.000281959	837
CASP4	mitomycin	0.143873	0.000156744	837
CASP4	TW-37	0.143501	0.000292666	837
CASP4	lenvatinib	0.143183	0.000499332	837
CASP4	avrainvillamide	0.143156	0.00244463	837
CASP4	CCT036477	0.142965	0.000200847	837
CASP4	KU-0063794	0.142914	0.000338696	837
CASP4	BRD-K09344309	0.142874	0.712923	837
CASP4	BRD-K70511574	0.141471	0.000191272	837
CASP4	sirolimus	0.141371	0.000258325	837
CASP4	MK-2206	0.140664	0.000738024	837
CASP4	nakiterpiosin	0.138827	0.000267059	837
CASP4	BRD-K28456706	0.138186	0.000605024	837
CASP4	BRD-K92856060	0.13814	0.000604082	837
CASP4	temsirolimus	0.138066	0.019916	837
CASP4	rigosertib	0.13716	0.000391507	837
CASP4	BRD-K11533227	0.137155	0.00110018	837
CASP4	BIRB-796	0.136958	0.00143033	837
CASP4	AZD1480	0.136905	0.0407563	837
CASP4	isoliquiritigenin	0.136384	0.110635	837
CASP4	indisulam	0.136361	0.000507828	837
CASP4	apicidin	0.136335	0.000276565	837
CASP4	CHM-1	0.135813	0.000312017	837
CASP4	parthenolide	0.135218	0.00756794	837
CASP4	ML311	0.133849	0.000357129	837
CASP4	TG-100-115	0.133769	0.00350241	837
CASP4	ABT-199	0.133427	0.0124434	837
CASP4	RG-108	0.132819	0.00139978	837
CASP4	AT13387	0.132618	0.0228278	837
CASP4	JQ-1	0.131186	0.000511933	837
CASP4	BRD-K66453893	0.130046	0.000618735	837
CASP4	paclitaxel	0.129729	0.000734712	837
CASP4	PHA-793887	0.128827	0.000604288	837
CASP4	Ko-143	0.128743	0.0010678	837
CASP4	Repligen 136	0.128334	0.00207044	837
CASP4	AZD8055	0.128267	0.00114955	837
CASP4	bendamustine	0.128253	0.00219152	837
CASP4	manumycin A	0.126605	0.000859021	837
CASP4	SMER-3	0.126045	0.00388701	837
CASP4	SCH-79797	0.125961	0.00109799	837
CASP4	MK-1775	0.125859	0.00119312	837
CASP4	BRD-K88742110	0.125278	0.0019919	837
CASP4	HBX-41108	0.124886	0.0161726	837
CASP4	SCH-529074	0.124106	0.0050523	837
CASP4	teniposide	0.123755	0.0223993	837
CASP4	BRD-K61166597	0.123492	0.00183238	837
CASP4	pazopanib	0.121889	0.00189397	837
CASP4	SRT-1720	0.121334	0.00463969	837
CASP4	etoposide	0.120514	0.00149118	837
CASP4	BRD-K34485477	0.119709	0.998562	837
CASP4	GW-405833	0.119328	0.00196899	837
CASP4	elocalcitol	0.118913	0.00217243	837
CASP4	SR8278	0.1179	0.729314	837
CASP4	sotrastaurin	0.11635	0.0123282	837
CASP4	OSI-930	0.115576	0.00808939	837
CASP4	cytarabine hydrochloride	0.114835	0.00233952	837
CASP4	KHS101	0.114745	0.00566301	837
CASP4	CIL41	0.11427	0.0865463	837
CASP4	narciclasine	0.113756	0.00318687	837
CASP4	AT7867	0.11373	0.00464872	837
CASP4	NSC48300	0.113553	0.00334987	837
CASP4	BRD-K41597374	0.113101	0.00428334	837
CASP4	tipifarnib-P1	0.112591	0.00412417	837
CASP4	BRD-K45681478	0.110641	0.0101308	837
CASP4	EX-527	0.110459	0.292414	837
CASP4	BMS-345541	0.1102	0.00485308	837
CASP4	fulvestrant	0.110186	0.737549	837
CASP4	BRD9876	0.109061	0.0536553	837
CASP4	barasertib	0.108799	0.00556269	837
CASP4	BRD-K51831558	0.108179	0.115581	837
CASP4	PDMP	0.108048	0.00953303	837
CASP4	Merck60	0.107429	0.00482901	837
CASP4	NSC632839	0.107385	0.00521347	837
CASP4	linifanib	0.107101	0.00568521	837
CASP4	BRD-M00053801	0.107032	0.219641	837
CASP4	olaparib	0.10702	0.00686961	837
CASP4	necrostatin-7	0.106964	0.0135626	837
CASP4	BRD-K85133207	0.106667	0.0126098	837
CASP4	linsitinib	0.106497	0.0111062	837
CASP4	docetaxel	0.105899	0.080438	837
CASP4	BMS-195614	0.105718	0.0572184	837
CASP4	GW-843682X	0.105579	0.0093503	837
CASP4	QS-11	0.105562	0.660971	837
CASP4	I-BET151	0.105296	0.00526656	837
CASP4	tretinoin	0.104013	0.0105852	837
CASP4	UNC0638	0.103984	0.0124757	837
CASP4	AZD7545	0.103796	0.0133494	837
CASP4	neopeltolide	0.103524	0.274942	837
CASP4	curcumin	0.103264	0.00772386	837
CASP4	dexamethasone	0.103233	0.0133522	837
CASP4	ZSTK474	0.103041	0.0392135	837
CASP4	Compound 23 citrate	0.10276	0.00920182	837
CASP4	KU-60019	0.102274	0.0092213	837
CASP4	RITA	0.101975	0.0130605	837
CASP4	Ki8751	0.101171	0.0171541	837
CASP4	ETP-46464	0.101009	0.0523395	837
CASP4	SZ4TA2	0.100252	0.31934	837
CASP4	SU11274	0.100053	0.0128106	837
CASP4	ABT-737	0.0999698	0.021457	837
CASP4	Bax channel blocker	0.0997048	0.0220162	837
CASP4	WP1130	0.0996112	0.0135213	837
CASP4	AZD4547	0.0979391	0.0293042	837
CASP4	QW-BI-011	0.0978926	0.291669	837
CASP4	PIK-93	0.0977163	0.0174721	837
CASP4	OSI-027	0.097494	0.0190289	837
CASP4	prochlorperazine	0.0965007	0.0275858	837
CASP4	tandutinib	0.0964068	0.0254205	837
CASP4	KW-2449	0.0935553	0.015557	837
CASP4	masitinib	0.0931865	0.0240711	837
CASP4	quizartinib	0.0929824	0.0871876	837
CASP4	BRD-A02303741	0.0928976	0.0684676	837
CASP4	BRD6340	0.0926487	0.0199353	837
CASP4	tacrolimus	0.092547	0.0284901	837
CASP4	CD-437	0.0925209	0.0172855	837
CASP4	R428	0.0919714	0.068995	837
CASP4	XL765	0.0913805	0.080448	837
CASP4	FQI-1	0.0910062	0.108841	837
CASP4	BIBR-1532	0.0909509	0.0404586	837
CASP4	BRD-K13999467	0.0905948	0.0327267	837
CASP4	BRD-K66532283	0.0902868	0.0258671	837
CASP4	SR-II-138A	0.0901724	0.0161098	837
CASP4	YM-155	0.0899414	0.0530346	837
CASP4	epigallocatechin-3-monogallate	0.089548	0.0446067	837
CASP4	CR-1-31B	0.0891121	0.0183089	837
CASP4	topotecan	0.088924	0.0197946	837
CASP4	bardoxolone methyl	0.0876781	0.0380328	837
CASP4	cediranib	0.0871795	0.427074	837
CASP4	BRD-K02251932	0.0867748	0.0753877	837
CASP4	BYL-719	0.0864498	0.167293	837
CASP4	BRD-K30748066	0.0863721	0.659611	837
CASP4	necrostatin-1	0.0863075	0.0586232	837
CASP4	NVP-ADW742	0.0861172	0.0478713	837
CASP4	brefeldin A	0.0849461	0.0540789	837
CASP4	SID 26681509	0.0848183	0.0593501	837
CASP4	spautin-1	0.0842881	0.074592	837
CASP4	alisertib	0.0840995	0.0327857	837
CASP4	chlorambucil	0.0840584	0.0342895	837
CASP4	16-beta-bromoandrosterone	0.0835818	0.0746201	837
CASP4	ibrutinib	0.082861	0.141996	837
CASP4	GDC-0941	0.0825477	0.0606018	837
CASP4	SKI-II	0.0825136	0.0599403	837
CASP4	GSK525762A	0.0824544	0.0322449	837
CASP4	bexarotene	0.0813634	0.0588185	837
CASP4	bortezomib	0.0802803	0.0453729	837
CASP4	BRD-K48334597	0.080229	0.495199	837
CASP4	HLI 373	0.079957	0.0559046	837
CASP4	BRD-K90370028	0.0799315	0.842434	837
CASP4	BMS-270394	0.0796885	0.0745255	837
CASP4	ML162	0.0795691	0.0564415	837
CASP4	PF-184	0.0789421	0.0487771	837
CASP4	tamoxifen	0.0785468	0.190187	837
CASP4	tivozanib	0.0781408	0.0953672	837
CASP4	PRIMA-1-Met	0.0774722	0.272439	837
CASP4	gemcitabine	0.0766286	0.0606325	837
CASP4	BRD4132	0.0765476	0.204499	837
CASP4	COL-3	0.0739639	0.113818	837
CASP4	NVP-231	0.073916	0.0617553	837
CASP4	AZ-3146	0.073602	0.0812859	837
CASP4	BRD1835	0.0734298	0.118101	837
CASP4	ML210	0.0733062	0.0780304	837
CASP4	NSC23766	0.0724078	0.0787068	837
CASP4	BMS-754807	0.0722551	0.107546	837
CASP4	MGCD-265	0.0722296	0.0694399	837
CASP4	NVP-BSK805	0.0715391	0.0781709	837
CASP4	PF-573228	0.0711839	0.0787265	837
CASP4	GSK1059615	0.0705692	0.78988	837
CASP4	BRD-A71883111	0.0698722	0.10962	837
CASP4	BRD-K37390332	0.0697527	0.653671	837
CASP4	KU 0060648	0.0697024	0.0915924	837
CASP4	fingolimod	0.0690827	0.0863811	837
CASP4	StemRegenin 1	0.065846	0.110183	837
CASP4	AZD6482	0.0653093	0.240811	837
CASP4	PRL-3 inhibitor I	0.0652937	0.56814	837
CASP4	1S,3R-RSL-3	0.0650016	0.115713	837
CASP4	JW-55	0.0647487	0.630826	837
CASP4	BRD-K19103580	0.0645222	0.190151	837
CASP4	erastin	0.0643766	0.137623	837
CASP4	decitabine	0.0628725	0.105304	837
CASP4	BRD9647	0.0625573	0.217993	837
CASP4	foretinib	0.0621694	0.152942	837
CASP4	nilotinib	0.0619751	0.400399	837
CASP4	ML203	0.061702	0.234811	837
CASP4	IU1	0.0616893	0.471466	837
CASP4	KU-55933	0.0616449	0.161632	837
CASP4	JW-74	0.0613873	0.479108	837
CASP4	navitoclax	0.0613083	0.158581	837
CASP4	pitstop2	0.0606137	0.743873	837
CASP4	Compound 1541A	0.059472	0.328585	837
CASP4	tipifarnib-P2	0.05832	0.321132	837
CASP4	thalidomide	0.0578312	0.775136	837
CASP4	leptomycin B	0.0569827	0.140205	837
CASP4	BRD-K14844214	0.0567756	0.417763	837
CASP4	SNS-032	0.056333	0.18558	837
CASP4	BRD8958	0.0551601	0.982209	837
CASP4	AA-COCF3	0.0548753	0.200153	837
CASP4	pevonedistat	0.0544457	0.190745	837
CASP4	myricetin	0.0542489	0.609035	837
CASP4	AM-580	0.0542085	0.302843	837
CASP4	lomeguatrib	0.0534851	0.336846	837
CASP4	GSK2636771	0.0528264	0.591567	837
CASP4	GANT-61	0.0521834	0.37786	837
CASP4	SN-38	0.0516421	0.270421	837
CASP4	RO4929097	0.0508522	0.521569	837
CASP4	CIL55A	0.0500709	0.438907	837
CASP4	MLN2480	0.0498041	0.653488	837
CASP4	3-Cl-AHPC	0.0487795	0.229436	837
CASP4	darinaparsin	0.0485198	0.489636	837
CASP4	TG-101348	0.0483795	0.257075	837
CASP4	sildenafil	0.0483789	0.692075	837
CASP4	BRD-K29313308	0.0481606	0.280386	837
CASP4	erismodegib	0.0476015	0.55081	837
CASP4	dabrafenib	0.0471081	0.566662	837
CASP4	BRD-K33514849	0.0469863	0.999288	837
CASP4	A-804598	0.0468806	0.778785	837
CASP4	vorapaxar	0.0455547	0.354662	837
CASP4	temozolomide	0.0450455	0.495203	837
CASP4	JW-480	0.0435089	0.811496	837
CASP4	Ch-55	0.0428194	0.40419	837
CASP4	regorafenib	0.042485	0.414088	837
CASP4	sunitinib	0.0416333	0.329283	837
CASP4	hyperforin	0.0415259	0.647295	837
CASP4	isonicotinohydroxamic acid	0.040879	0.99255	837
CASP4	tigecycline	0.0404869	0.54007	837
CASP4	cyanoquinoline 11	0.0404257	0.687679	837
CASP4	PF-543	0.0399109	0.419222	837
CASP4	WZ4002	0.0396013	0.607691	837
CASP4	N9-isopropylolomoucine	0.0395115	0.359248	837
CASP4	salermide	0.0391834	0.711718	837
CASP4	silmitasertib	0.0391035	0.663078	837
CASP4	nintedanib	0.0377107	0.518431	837
CASP4	SR1001	0.037309	0.621103	837
CASP4	Mdivi-1	0.0372478	0.406681	837
CASP4	importazole	0.0367582	0.580938	837
CASP4	purmorphamine	0.0354629	0.476908	837
CASP4	BRD-K64610608	0.035311	0.773344	837
CASP4	CBB-1007	0.035216	0.858694	837
CASP4	NPC-26	0.0329377	0.786993	837
CASP4	LE-135	0.0326822	0.489733	837
CASP4	GSK-3 inhibitor IX	0.0314768	0.497073	837
CASP4	NSC 74859	0.0314006	0.585261	837
CASP4	SB-431542	0.0312539	0.784471	837
CASP4	WZ8040	0.0307347	0.590811	837
CASP4	cyclophosphamide	0.0302905	0.993392	837
CASP4	clofarabine	0.0298048	0.45923	837
CASP4	trifluoperazine	0.0296015	0.609784	837
CASP4	pandacostat	0.0295828	0.553126	837
CASP4	triptolide	0.0295129	0.483185	837
CASP4	CD-1530	0.0287282	0.640756	837
CASP4	crizotinib	0.0275028	0.519605	837
CASP4	KH-CB19	0.0270038	0.824875	837
CASP4	BRD-K30019337	0.0250377	0.953305	837
CASP4	BRD-K52037352	0.0246345	0.739182	837
CASP4	momelotinib	0.0241642	0.589805	837
CASP4	TPCA-1	0.0239598	0.585136	837
CASP4	imatinib	0.0237088	0.616635	837
CASP4	BRD-K27986637	0.0234	0.915889	837
CASP4	AZD7762	0.0222437	0.602929	837
CASP4	HC-067047	0.0217729	0.765451	837
CASP4	ML006	0.0191484	0.754743	837
CASP4	ML083	0.0188201	0.902984	837
CASP4	GSK4112	0.0181489	0.755672	837
CASP4	FSC231	0.0178086	0.99945	837
CASP4	pifithrin-alpha	0.0176392	0.821971	837
CASP4	cimetidine	0.0174812	0.99519	837
CASP4	MLN2238	0.0174219	0.691488	837
CASP4	968	0.0171511	0.997701	837
CASP4	istradefylline	0.0166295	0.939973	837
CASP4	SNX-2112	0.0163561	0.690864	837
CASP4	dacarbazine	0.0161426	0.708386	837
CASP4	palmostatin B	0.0157831	0.915954	837
CASP4	CAY10594	0.0150815	0.835417	837
CASP4	MK-0752	0.0142199	0.875617	837
CASP4	cabozantinib	0.0136948	0.820431	837
CASP4	TGX-221	0.0132268	0.89417	837
CASP4	ML258	0.0123611	0.92608	837
CASP4	azacitidine	0.0119213	0.833945	837
CASP4	BRD-K71781559	0.0105326	0.996572	837
CASP4	CI-976	0.0103525	0.959546	837
CASP4	BRD-K55116708	0.0083753	0.883389	837
CASP4	BRD-K42260513	0.00819679	0.998533	837
CASP4	austocystin D	0.00759121	0.89424	837
CASP4	BRD-K04800985	0.00744533	0.999785	837
CASP4	itraconazole	0.00734769	0.939894	837
CASP4	fluvastatin	0.00678254	0.923989	837
CASP4	RAF265	0.00651774	0.931266	837
CASP4	CID-5951923	0.00618127	0.963949	837
CASP4	CIL55	0.00439652	0.989593	837
CASP4	CAL-101	0.00365684	0.966707	837
CASP4	AC55649	0.00311796	0.990789	837
CASP4	veliparib	0.00111692	0.99125	837
CASP4	BRD-K29086754	0.000710042	0.998486	837
CASP4	nelarabine	-0.000488441	0.998956	837
CASP4	CHIR-99021	-0.000746612	0.988702	837
CASP4	staurosporine	-0.00162013	0.995006	837
CASP4	BRD-K48477130	-0.00203996	0.993907	837
CASP4	methotrexate	-0.00381391	0.937454	837
CASP4	ML320	-0.0040594	0.945645	837
CASP4	IPR-456	-0.00487956	0.983032	837
CASP4	cytochalasin B	-0.00748253	0.912456	837
CASP4	tosedostat	-0.00783011	0.880304	837
CASP4	L-685458	-0.00807478	0.919343	837
CASP4	AT-406	-0.00904307	0.952781	837
CASP4	PF-4800567 hydrochloride	-0.00910184	0.999586	837
CASP4	BRD-K01737880	-0.00927133	0.978043	837
CASP4	UNC0321	-0.0106849	0.946991	837
CASP4	semagacestat	-0.0116754	0.952221	837
CASP4	SJ-172550	-0.0118354	0.939	837
CASP4	NSC30930	-0.0126205	0.893017	837
CASP4	vemurafenib	-0.0136494	0.844085	837
CASP4	BRD-K33199242	-0.0192483	0.978379	837
CASP4	zebularine	-0.0198514	0.654191	837
CASP4	procarbazine	-0.0200854	0.935118	837
CASP4	fluorouracil	-0.0202105	0.632595	837
CASP4	AGK-2	-0.0206029	0.961324	837
CASP4	WAY-362450	-0.0207654	0.998521	837
CASP4	PLX-4720	-0.0209236	0.817667	837
CASP4	tamatinib	-0.0230656	0.809657	837
CASP4	ciclosporin	-0.0231831	0.713086	837
CASP4	BRD-K78574327	-0.0254011	0.983493	837
CASP4	BRD-K75293299	-0.0272089	0.936875	837
CASP4	bafilomycin A1	-0.0293372	0.9742	837
CASP4	ifosfamide	-0.0295979	0.901141	837
CASP4	BRD-K49290616	-0.0307912	0.956441	837
CASP4	SGX-523	-0.0315307	0.637364	837
CASP4	VAF-347	-0.0324951	0.651195	837
CASP4	NVP-TAE684	-0.0332908	0.524124	837
CASP4	DNMDP	-0.035128	0.649153	837
CASP4	lapatinib	-0.0354331	0.466194	837
CASP4	betulinic acid	-0.0369492	0.834188	837
CASP4	etomoxir	-0.0371505	0.953986	837
CASP4	CAY10576	-0.0377629	0.623475	837
CASP4	neratinib	-0.0377971	0.421466	837
CASP4	VU0155056	-0.0384757	0.912547	837
CASP4	O-6-benzylguanine	-0.0387551	0.788758	837
CASP4	avicin D	-0.0388137	0.709041	837
CASP4	FGIN-1-27	-0.0407409	0.779939	837
CASP4	BRD-K84807411	-0.0417064	0.897465	837
CASP4	BRD-K16147474	-0.0417634	0.914945	837
CASP4	pyrazolanthrone	-0.0428488	0.416315	837
CASP4	abiraterone	-0.0433855	0.785651	837
CASP4	BRD-K50799972	-0.0439557	0.548126	837
CASP4	BRD-K02492147	-0.0453365	0.456839	837
CASP4	ML334 diastereomer	-0.0461508	0.54471	837
CASP4	BRD-K63431240	-0.0464033	0.306763	837
CASP4	BRD-K96970199	-0.047523	0.998764	837
CASP4	BRD8899	-0.0486806	0.648499	837
CASP4	MI-1	-0.0499895	0.547955	837
CASP4	BRD-K09587429	-0.054216	0.40117	837
CASP4	ruxolitinib	-0.0551234	0.205938	837
CASP4	sitagliptin	-0.0569079	0.997718	837
CASP4	BRD-K17060750	-0.0577265	0.253126	837
CASP4	canertinib	-0.0577651	0.220173	837
CASP4	C6-ceramide	-0.0579208	0.584139	837
CASP4	BEC	-0.058598	0.999979	837
CASP4	CIL56	-0.059087	0.349339	837
CASP4	BRD-K44224150	-0.0602022	0.989582	837
CASP4	afatinib	-0.0602203	0.208124	837
CASP4	BRD-K27224038	-0.0606409	0.831189	837
CASP4	IC-87114	-0.0652454	0.295296	837
CASP4	BRD-A05715709	-0.0686234	0.641142	837
CASP4	BRD-K41334119	-0.0705743	0.908994	837
CASP4	BRD-K96431673	-0.0715785	0.985799	837
CASP4	tanespimycin	-0.0720647	0.156935	837
CASP4	GDC-0879	-0.072246	0.159236	837
CASP4	simvastatin	-0.0740285	0.184375	837
CASP4	fumonisin B1	-0.0749853	0.163656	837
CASP4	BMS-536924	-0.0770664	0.126859	837
CASP4	lovastatin	-0.0836495	0.0791012	837
CASP4	pluripotin	-0.0858449	0.0632598	837
CASP4	BRD5468	-0.0859386	0.222687	837
CASP4	LY-2157299	-0.0893394	0.695844	837
CASP4	bosutinib	-0.0911166	0.0258626	837
CASP4	VER-155008	-0.0957081	0.0207503	837
CASP4	vandetanib	-0.0961551	0.0414218	837
CASP4	gefitinib	-0.0992045	0.0317366	837
CASP4	BCL-LZH-4	-0.104813	0.55349	837
CASP4	myriocin	-0.105333	0.837422	837
CASP4	blebbistatin	-0.106764	0.88464	837
CASP4	BRD-K99006945	-0.107001	0.126645	837
CASP4	bleomycin A2	-0.108471	0.0280435	837
CASP4	BRD1378	-0.110424	0.124187	837
CASP4	ML312	-0.11274	0.95729	837
CASP4	PD 153035	-0.113004	0.0347627	837
CASP4	BRD-K86535717	-0.121576	0.671746	837
CASP4	erlotinib	-0.1413	0.00055828	837
CASP4	birinapant	-0.142111	0.0073403	837
CASP4	tozasertib	-0.145462	0.400059	837
CASP4	saracatinib	-0.167274	4.7497e-05	837
CASP4	dasatinib	-0.190015	2.39308e-06	837
CASP4	selumetinib	-0.193897	3.49661e-06	837
CASP4	PD318088	-0.195836	1.458e-06	837
CASP4	trametinib	-0.222497	0.00044801	837
CASP5	BRD-K96431673	0.180928	0.985799	838
CASP5	BRD-K33514849	0.155327	0.999288	838
CASP5	TG-100-115	0.152401	0.000770794	838
CASP5	abiraterone	0.120749	0.347283	838
CASP5	bafilomycin A1	0.119454	0.825073	838
CASP5	PF-4800567 hydrochloride	0.111772	0.999586	838
CASP5	CIL70	0.109827	0.0565148	838
CASP5	VAF-347	0.106709	0.0727594	838
CASP5	epigallocatechin-3-monogallate	0.0948616	0.0323912	838
CASP5	MLN2480	0.0880054	0.34434	838
CASP5	BRD-K48477130	0.0871478	0.649498	838
CASP5	PLX-4720	0.0864754	0.160242	838
CASP5	BRD-K99006945	0.0859173	0.229212	838
CASP5	darinaparsin	0.0831585	0.201474	838
CASP5	AM-580	0.0830235	0.0896497	838
CASP5	SMER-3	0.0828983	0.0665613	838
CASP5	BRD-K92856060	0.0822287	0.0490339	838
CASP5	fulvestrant	0.081116	0.823277	838
CASP5	BRD-K90370028	0.078284	0.843967	838
CASP5	SZ4TA2	0.0781084	0.472975	838
CASP5	BRD-K49290616	0.0779819	0.839257	838
CASP5	ABT-199	0.0746212	0.186268	838
CASP5	prochlorperazine	0.0702543	0.122263	838
CASP5	nilotinib	0.0698877	0.331515	838
CASP5	HBX-41108	0.069303	0.21765	838
CASP5	ML239	0.0690198	0.10891	838
CASP5	BRD-K96970199	0.0675419	0.998764	838
CASP5	ifosfamide	0.067349	0.724091	838
CASP5	BRD-A02303741	0.0659295	0.215172	838
CASP5	XL765	0.0647195	0.248508	838
CASP5	BIBR-1532	0.0631487	0.174544	838
CASP5	cytochalasin B	0.0626287	0.218513	838
CASP5	procarbazine	0.0625226	0.699512	838
CASP5	MK-0752	0.0606503	0.389791	838
CASP5	sitagliptin	0.0602878	0.997718	838
CASP5	CAY10594	0.0585546	0.312003	838
CASP5	BRD-K04800985	0.0577352	0.99881	838
CASP5	BRD-K50799972	0.0573003	0.402481	838
CASP5	LY-2157299	0.0567712	0.828161	838
CASP5	BRD-M00053801	0.0563883	0.586358	838
CASP5	ABT-737	0.0557199	0.228841	838
CASP5	SB-525334	0.055445	0.284848	838
CASP5	palmostatin B	0.0548505	0.619367	838
CASP5	sildenafil	0.0546281	0.650018	838
CASP5	AZD4547	0.0544527	0.259132	838
CASP5	isoliquiritigenin	0.0540084	0.565414	838
CASP5	niclosamide	0.0531014	0.243182	838
CASP5	isonicotinohydroxamic acid	0.0523972	0.969888	838
CASP5	ML029	0.0515248	0.263395	838
CASP5	veliparib	0.05134	0.510405	838
CASP5	BRD-A05715709	0.0511829	0.742785	838
CASP5	IC-87114	0.050674	0.447442	838
CASP5	Bax channel blocker	0.0501392	0.282345	838
CASP5	SJ-172550	0.0499017	0.644575	838
CASP5	YM-155	0.0498318	0.315952	838
CASP5	cimetidine	0.0489319	0.972471	838
CASP5	navitoclax	0.0480269	0.282591	838
CASP5	tubastatin A	0.0479773	0.47031	838
CASP5	BRD-K86535717	0.0477785	0.902241	838
CASP5	UNC0638	0.0476119	0.290317	838
CASP5	pitstop2	0.0474493	0.80929	838
CASP5	DNMDP	0.0464807	0.519224	838
CASP5	etomoxir	0.0463777	0.948445	838
CASP5	BRD-K78574327	0.0456261	0.972049	838
CASP5	phloretin	0.0441993	0.285754	838
CASP5	BRD-K71781559	0.043393	0.988194	838
CASP5	ML258	0.0424347	0.695922	838
CASP5	dabrafenib	0.0422677	0.610329	838
CASP5	CCT036477	0.0416298	0.316702	838
CASP5	tivozanib	0.0403724	0.431621	838
CASP5	nutlin-3	0.0402177	0.350943	838
CASP5	KH-CB19	0.0387011	0.736138	838
CASP5	erastin	0.0386416	0.403167	838
CASP5	chlorambucil	0.0363565	0.388478	838
[truncated: 12,913 more rows]

## Sheet: Table S7
Table S7 GDSC drug sensitivity for pyroptosis genes in cancers
Symbol	Drug	Cor	Fdr	Entrez
AIM2	(5Z)-7-Oxozeaenol	-0.0503706	0.229076	9447
AIM2	17-AAG	0.0364304	0.352574	9447
AIM2	5-Fluorouracil	-0.18817	7.07725e-08	9447
AIM2	681640	-0.0402613	0.51307	9447
AIM2	A-443654	-0.0563186	0.739235	9447
AIM2	A-770041	-0.176057	0.00805196	9447
AIM2	AC220	0.0561511	0.220315	9447
AIM2	AG-014699	0.0827851	0.0442159	9447
AIM2	AICAR	-0.191446	2.66278e-07	9447
AIM2	AKT inhibitor VIII	0.0501026	0.271116	9447
AIM2	AMG-706	0.0668336	0.217725	9447
AIM2	AP-24534	-0.110086	0.00452087	9447
AIM2	AR-42	-0.088911	0.0131184	9447
AIM2	AS601245	-0.0091431	0.898341	9447
AIM2	AS605240	-0.00287605	0.959365	9447
AIM2	AT-7519	-0.215014	3.34422e-10	9447
AIM2	ATRA	-0.063302	0.17778	9447
AIM2	AUY922	-0.100313	0.0250517	9447
AIM2	AZ628	0.0963901	0.17401	9447
AIM2	AZD6482	-0.0818774	0.0498484	9447
AIM2	AZD7762	-0.137003	0.000314408	9447
AIM2	AZD8055	-0.160251	1.985e-05	9447
AIM2	Afatinib	-0.0481406	0.207032	9447
AIM2	Axitinib	0.0350611	0.530678	9447
AIM2	BAY 61-3606	-0.128776	0.000821102	9447
AIM2	BEZ235	-0.11546	0.00641082	9447
AIM2	BHG712	-0.0869623	0.0161385	9447
AIM2	BI-2536	0.011618	0.935704	9447
AIM2	BIRB 0796	0.0297599	0.590939	9447
AIM2	BIX02189	-0.0463854	0.221662	9447
AIM2	BMS-509744	0.0758658	0.398424	9447
AIM2	BMS-536924	-0.00694184	0.943538	9447
AIM2	BMS-708163	0.0414352	0.317914	9447
AIM2	BMS-754807	0.12121	0.00782944	9447
AIM2	BMS345541	-0.097148	0.00650097	9447
AIM2	BX-795	-0.0726648	0.0948162	9447
AIM2	BX-912	-0.0608639	0.0936461	9447
AIM2	Belinostat	-0.108854	0.00286401	9447
AIM2	Bexarotene	0.0479274	0.496446	9447
AIM2	Bicalutamide	0.0316135	0.506777	9447
AIM2	Bleomycin	-0.0547439	0.30679	9447
AIM2	Bleomycin (50 uM)	-0.0709087	0.052107	9447
AIM2	Bortezomib	-0.118415	0.0885469	9447
AIM2	Bosutinib	-0.129478	0.00246366	9447
AIM2	Bryostatin 1	0.0548996	0.279512	9447
AIM2	CAL-101	-0.163599	4.20939e-06	9447
AIM2	CAY10603	-0.108001	0.00235119	9447
AIM2	CCT007093	0.0631151	0.139196	9447
AIM2	CCT018159	-0.0994616	0.0277858	9447
AIM2	CEP-701	-0.111385	0.00407774	9447
AIM2	CGP-082996	-0.0574324	0.559237	9447
AIM2	CGP-60474	-0.232191	0.000382854	9447
AIM2	CH5424802	-0.158774	7.3558e-05	9447
AIM2	CHIR-99021	0.0401959	0.312658	9447
AIM2	CI-1040	-0.00657508	0.905373	9447
AIM2	CMK	-0.173024	0.0498846	9447
AIM2	CP466722	-0.0961748	0.0070064	9447
AIM2	CP724714	0.0423738	0.438568	9447
AIM2	CUDC-101	-0.135531	0.000151492	9447
AIM2	CX-5461	-0.0522001	0.166957	9447
AIM2	Camptothecin	-0.113214	0.00469604	9447
AIM2	Cetuximab	-0.00469564	0.919932	9447
AIM2	Cisplatin	-0.0309924	0.558693	9447
AIM2	Crizotinib	-0.110632	0.289491	9447
AIM2	Cyclopamine	-0.11025	0.216933	9447
AIM2	Cytarabine	0.0324314	0.551705	9447
AIM2	DMOG	-0.159763	3.6197e-05	9447
AIM2	Dabrafenib	-0.0169191	0.731996	9447
AIM2	Dasatinib	-0.063884	0.352809	9447
AIM2	Docetaxel	-0.0262398	0.511811	9447
AIM2	Doxorubicin	-0.096241	0.0678403	9447
AIM2	EHT 1864	0.156824	0.0011072	9447
AIM2	EKB-569	-0.0554341	0.170647	9447
AIM2	EX-527	0.0182455	0.88517	9447
AIM2	Elesclomol	0.0431276	0.347302	9447
AIM2	Embelin	-0.042645	0.475331	9447
AIM2	Epothilone B	-0.0131092	0.832389	9447
AIM2	Erlotinib	0.0500204	0.509958	9447
AIM2	Etoposide	-0.0586008	0.202911	9447
AIM2	FH535	0.0997893	0.0194114	9447
AIM2	FK866	-0.0603267	0.104178	9447
AIM2	FMK	-0.0292648	0.694955	9447
AIM2	FR-180204	0.0707719	0.13589	9447
AIM2	FTI-277	0.00128729	0.9811	9447
AIM2	Foretinib	-0.0635274	0.118336	9447
AIM2	GDC0449	-0.0756565	0.34176	9447
AIM2	GDC0941	-0.0855134	0.0707248	9447
AIM2	GNF-2	0.0622399	0.781936	9447
AIM2	GSK-650394	0.0346033	0.653731	9447
AIM2	GSK1070916	0.0313697	0.424808	9447
AIM2	GSK1904529A	0.0798362	0.0672788	9447
AIM2	GSK2126458	-0.0856116	0.0208117	9447
AIM2	GSK269962A	-0.0201513	0.742321	9447
AIM2	GSK429286A	-0.027058	0.553023	9447
AIM2	GSK690693	-0.0482365	0.207236	9447
AIM2	GW 441756	0.0587669	0.699808	9447
AIM2	GW-2580	0.0673471	0.630592	9447
AIM2	GW843682X	-0.0302424	0.77162	9447
AIM2	Gefitinib	-0.0855598	0.0341368	9447
AIM2	Gemcitabine	-0.105436	0.0154647	9447
AIM2	Genentech Cpd 10	-0.0547763	0.147748	9447
AIM2	HG-5-113-01	-0.0460904	0.540362	9447
AIM2	HG-5-88-01	-0.0983868	0.343794	9447
AIM2	HG-6-64-1	-0.0875374	0.0423337	9447
AIM2	I-BET-762	-0.0916172	0.00905173	9447
AIM2	IOX2	-0.0402292	0.496213	9447
AIM2	IPA-3	-0.124967	0.000912121	9447
AIM2	Imatinib	0.0534274	0.740274	9447
AIM2	Ispinesib Mesylate	-0.144114	4.4673e-05	9447
AIM2	JNJ-26854165	-0.048506	0.337316	9447
AIM2	JNK Inhibitor VIII	0.0422035	0.337561	9447
AIM2	JNK-9L	-0.0527357	0.330127	9447
AIM2	JQ1	-0.0815947	0.0447156	9447
AIM2	JQ12	-0.0419262	0.448651	9447
AIM2	JW-7-24-1	-0.11315	0.00136117	9447
AIM2	JW-7-52-1	-0.072395	0.451607	9447
AIM2	KIN001-055	-0.0102542	0.910541	9447
AIM2	KIN001-102	-0.045827	0.215628	9447
AIM2	KIN001-135	0.0987851	0.281511	9447
AIM2	KIN001-236	-0.0479015	0.211425	9447
AIM2	KIN001-244	-0.0667363	0.0725672	9447
AIM2	KIN001-260	-0.14494	3.8871e-05	9447
AIM2	KIN001-266	-0.0448987	0.352031	9447
AIM2	KIN001-270	-0.170531	2.93082e-06	9447
AIM2	KU-55933	-0.0968098	0.0520563	9447
AIM2	LAQ824	-0.091137	0.0182461	9447
AIM2	LFM-A13	0.0281347	0.61621	9447
AIM2	LY317615	-0.0246893	0.608608	9447
AIM2	Lapatinib	0.0851045	0.179525	9447
AIM2	Lenalidomide	-0.101828	0.0634767	9447
AIM2	Linifanib	0.0272143	0.638328	9447
AIM2	Lisitinib	0.116316	0.0165262	9447
AIM2	MG-132	-0.0637823	0.473396	9447
AIM2	MK-2206	-0.032149	0.562315	9447
AIM2	MLN4924	-0.0185124	0.777686	9447
AIM2	MP470	0.0236265	0.616688	9447
AIM2	MPS-1-IN-1	-0.120362	0.000946125	9447
AIM2	MS-275	-0.105773	0.155337	9447
AIM2	Masitinib	-0.0663376	0.0793365	9447
AIM2	Methotrexate	-0.192133	7.32447e-08	9447
AIM2	Midostaurin	0.0466378	0.305882	9447
AIM2	Mitomycin C	-0.0678982	0.156159	9447
AIM2	NG-25	-0.132467	0.000162964	9447
AIM2	NPK76-II-72-1	-0.0779206	0.0282793	9447
AIM2	NSC-207895	0.00457391	0.939087	9447
AIM2	NSC-87877	0.0646638	0.22418	9447
AIM2	NU-7441	-0.0605354	0.357873	9447
AIM2	Navitoclax	0.0297413	0.459211	9447
AIM2	Nilotinib	-0.0173412	0.776462	9447
AIM2	Nutlin-3a (-)	-0.109013	0.0100433	9447
AIM2	OSI-027	-0.117441	0.000962152	9447
AIM2	OSI-930	-0.0545471	0.166034	9447
AIM2	OSU-03012	-0.0722303	0.117866	9447
AIM2	Obatoclax Mesylate	-0.118233	0.00436982	9447
AIM2	Olaparib	0.0130084	0.799304	9447
AIM2	PAC-1	-0.0759764	0.0635299	9447
AIM2	PD-0325901	0.0533592	0.193189	9447
AIM2	PD-0332991	-0.0138256	0.845001	9447
AIM2	PD-173074	0.00274267	0.993363	9447
AIM2	PF-4708671	0.0807308	0.338594	9447
AIM2	PF-562271	0.0123673	0.858441	9447
AIM2	PFI-1	-0.110463	0.00899498	9447
AIM2	PHA-665752	0.0882444	0.512966	9447
AIM2	PHA-793887	-0.176034	2.82795e-07	9447
AIM2	PI-103	-0.149582	2.0834e-05	9447
AIM2	PIK-93	-0.122218	0.000469413	9447
AIM2	PLX4720	-0.0431646	0.308226	9447
AIM2	Paclitaxel	-0.0631722	0.562694	9447
AIM2	Parthenolide	-0.104915	0.261196	9447
AIM2	Pazopanib	0.0299684	0.616136	9447
AIM2	Phenformin	-0.116006	0.00138147	9447
AIM2	Pyrimethamine	-0.0324406	0.800956	9447
AIM2	QL-VIII-58	-0.059869	0.433252	9447
AIM2	QL-X-138	-0.120939	0.000736055	9447
AIM2	QL-XI-92	-0.129379	0.000252229	9447
AIM2	QL-XII-47	-0.103865	0.00638565	9447
AIM2	QL-XII-61	-0.125874	0.0322813	9447
AIM2	QS11	0.0262316	0.709267	9447
AIM2	RDEA119	0.0277765	0.489557	9447
AIM2	RO-3306	-0.0522664	0.218999	9447
AIM2	Rapamycin	-0.0968192	0.349313	9447
AIM2	Roscovitine	-0.0980888	0.496958	9447
AIM2	Ruxolitinib	-0.128678	0.00178818	9447
AIM2	S-Trityl-L-cysteine	-0.0705936	0.381638	9447
AIM2	SB 216763	0.0264294	0.622476	9447
AIM2	SB 505124	0.109791	0.0531948	9447
AIM2	SB52334	0.0825012	0.0514419	9447
AIM2	SB590885	-0.012609	0.82663	9447
AIM2	SGC0946	0.0313379	0.587137	9447
AIM2	SL 0101-1	0.0127482	0.89427	9447
AIM2	SN-38	-0.117913	0.00247806	9447
AIM2	SNX-2112	-0.227148	3.91707e-11	9447
AIM2	STF-62247	-0.0741579	0.0606732	9447
AIM2	Salubrinal	-0.0494733	0.581509	9447
AIM2	Saracatinib	0.0256562	0.789258	9447
AIM2	Shikonin	-0.0787965	0.102068	9447
AIM2	Sorafenib	0.054052	0.631448	9447
AIM2	Sunitinib	-0.0502476	0.531309	9447
AIM2	T0901317	-0.107783	0.0051286	9447
AIM2	TAE684	-0.0578756	0.608967	9447
AIM2	TAK-715	-0.125416	0.000402994	9447
AIM2	TG101348	-0.0993433	0.00522172	9447
AIM2	TGX221	-0.0249224	0.729684	9447
AIM2	THZ-2-102-1	-0.156263	8.73974e-06	9447
AIM2	THZ-2-49	-0.0905338	0.0133119	9447
AIM2	TL-1-85	-0.110284	0.00195406	9447
AIM2	TL-2-105	0.0268406	0.503689	9447
AIM2	TPCA-1	-0.16062	3.25942e-06	9447
AIM2	TW 37	-0.0101007	0.862046	9447
AIM2	Talazoparib	-0.0105727	0.845372	9447
AIM2	Tamoxifen	-0.091652	0.255797	9447
AIM2	Temozolomide	-0.21966	1.29043e-08	9447
AIM2	Temsirolimus	-0.164092	4.1802e-05	9447
AIM2	Thapsigargin	0.0180388	0.824742	9447
AIM2	Tipifarnib	-0.0245988	0.744588	9447
AIM2	Tivozanib	0.0232509	0.728093	9447
AIM2	Trametinib	0.0104452	0.807906	9447
AIM2	Tubastatin A	-0.0949894	0.00765737	9447
AIM2	UNC0638	-0.129364	0.000171981	9447
AIM2	UNC1215	0.043027	0.404069	9447
AIM2	VNLG/124	-0.0628441	0.123277	9447
AIM2	VX-11e	-0.00637362	0.922504	9447
AIM2	VX-680	0.0281115	0.803108	9447
AIM2	VX-702	-0.0346502	0.887965	9447
AIM2	Veliparib	0.00787325	0.930252	9447
AIM2	Vinblastine	-0.172628	9.22138e-06	9447
AIM2	Vinorelbine	-0.051677	0.334563	9447
AIM2	Vorinostat	-0.125029	0.00056885	9447
AIM2	WH-4-023	-0.0861074	0.249601	9447
AIM2	WZ-1-84	-0.0475438	0.564107	9447
AIM2	WZ3105	-0.0628988	0.0836022	9447
AIM2	XAV939	0.0329906	0.424245	9447
AIM2	XL-184	-0.00947083	0.871299	9447
AIM2	XMD11-85h	-0.100679	0.422115	9447
AIM2	XMD13-2	-0.187354	5.71197e-08	9447
AIM2	XMD14-99	-0.136317	0.000168926	9447
AIM2	XMD15-27	-0.096998	0.0219405	9447
AIM2	XMD8-85	-0.0773571	0.332579	9447
AIM2	XMD8-92	-0.0941324	0.295875	9447
AIM2	Y-39983	-0.1244	0.000558496	9447
AIM2	YK 4-279	-0.0756909	0.122608	9447
AIM2	YM155	-0.116088	0.00749035	9447
AIM2	YM201636	-0.0344164	0.377457	9447
AIM2	Z-LLNle-CHO	-0.198535	0.00117789	9447
AIM2	ZG-10	-0.0618355	0.35377	9447
AIM2	ZM-447439	-0.00630935	0.91432	9447
AIM2	ZSTK474	-0.108716	0.00237909	9447
AIM2	Zibotentan	-0.0311614	0.916769	9447
AIM2	piperlongumine	-0.0476736	0.27946	9447
AIM2	rTRAIL	0.0334929	0.668039	9447
AIM2	selumetinib	0.0157649	0.710347	9447
CASP1	(5Z)-7-Oxozeaenol	-0.152552	3.3881e-05	834
CASP1	17-AAG	-0.126492	0.00054842	834
CASP1	5-Fluorouracil	-0.190873	4.48232e-08	834
CASP1	681640	-0.0298767	0.644168	834
CASP1	A-443654	-0.121951	0.393355	834
CASP1	A-770041	-0.0650918	0.422187	834
CASP1	AC220	-0.0559184	0.222532	834
CASP1	AG-014699	-0.0212606	0.654072	834
CASP1	AICAR	-0.184345	7.67228e-07	834
CASP1	AKT inhibitor VIII	-0.0195528	0.705791	834
CASP1	AMG-706	0.0280745	0.682039	834
CASP1	AP-24534	-0.0863283	0.0297776	834
CASP1	AR-42	-0.0490084	0.185854	834
CASP1	AS601245	-0.0733932	0.137689	834
CASP1	AS605240	-0.0765808	0.0614519	834
CASP1	AT-7519	-0.152131	1.2544e-05	834
CASP1	ATRA	-0.113174	0.00772769	834
CASP1	AUY922	-0.138154	0.00111992	834
CASP1	AZ628	-0.111217	0.107225	834
CASP1	AZD6482	-0.061258	0.164054	834
CASP1	AZD7762	-0.170708	5.21547e-06	834
CASP1	AZD8055	-0.0556739	0.167118	834
CASP1	Afatinib	-0.0876358	0.0163326	834
CASP1	Axitinib	-0.0232031	0.705627	834
CASP1	BAY 61-3606	-0.0924027	0.0193806	834
CASP1	BEZ235	-0.10355	0.0162806	834
CASP1	BHG712	-0.0950876	0.00814841	834
CASP1	BI-2536	-0.137998	0.113641	834
CASP1	BIRB 0796	0.0343994	0.527829	834
CASP1	BIX02189	-0.0907748	0.0122761	834
CASP1	BMS-509744	-0.0374073	0.708815	834
CASP1	BMS-536924	-0.04695	0.476094	834
CASP1	BMS-708163	0.0415237	0.316915	834
CASP1	BMS-754807	0.0472743	0.385259	834
CASP1	BMS345541	-0.0608297	0.097195	834
CASP1	BX-795	-0.0892637	0.0347604	834
CASP1	BX-912	-0.103408	0.00342005	834
CASP1	Belinostat	-0.060254	0.11116	834
CASP1	Bexarotene	-0.0664611	0.280721	834
CASP1	Bicalutamide	-0.00689411	0.90336	834
CASP1	Bleomycin	-0.108678	0.0189263	834
CASP1	Bleomycin (50 uM)	-0.204094	4.22233e-09	834
CASP1	Bortezomib	-0.164643	0.0116016	834
CASP1	Bosutinib	-0.133845	0.00166981	834
CASP1	Bryostatin 1	-0.00876306	0.897218	834
CASP1	CAL-101	-0.0814686	0.0288361	834
CASP1	CAY10603	-0.0737782	0.0412868	834
CASP1	CCT007093	-0.0185079	0.712166	834
CASP1	CCT018159	-0.074234	0.115703	834
CASP1	CEP-701	-0.134269	0.000442413	834
CASP1	CGP-082996	-0.0434155	0.676625	834
CASP1	CGP-60474	-0.224213	0.00060555	834
CASP1	CH5424802	-0.140957	0.000728351	834
CASP1	CHIR-99021	0.00447717	0.923395	834
CASP1	CI-1040	-0.122934	0.00197787	834
CASP1	CMK	-0.110023	0.262589	834
CASP1	CP466722	-0.0700989	0.0531799	834
CASP1	CP724714	0.0309407	0.596653	834
CASP1	CUDC-101	-0.107034	0.00312434	834
CASP1	CX-5461	-0.0472926	0.21408	834
CASP1	Camptothecin	-0.140447	0.000338167	834
CASP1	Cetuximab	-0.0778393	0.0514959	834
CASP1	Cisplatin	-0.0618985	0.193947	834
CASP1	Crizotinib	-0.184653	0.0148893	834
CASP1	Cyclopamine	-0.116248	0.188422	834
CASP1	Cytarabine	-0.0548075	0.267839	834
CASP1	DMOG	-0.169081	1.1278e-05	834
CASP1	Dabrafenib	-0.061127	0.150975	834
CASP1	Dasatinib	-0.0749682	0.267501	834
CASP1	Docetaxel	-0.164212	6.8896e-06	834
CASP1	Doxorubicin	-0.128103	0.0106007	834
CASP1	EHT 1864	0.0485321	0.444837	834
CASP1	EKB-569	-0.0500141	0.221863	834
CASP1	EX-527	-0.00407052	0.977784	834
CASP1	Elesclomol	-0.0161783	0.754146	834
CASP1	Embelin	-0.07478	0.146524	834
CASP1	Epothilone B	-0.12425	0.00512093	834
CASP1	Erlotinib	0.0232075	0.775495	834
CASP1	Etoposide	-0.101817	0.0162409	834
CASP1	FH535	0.0374627	0.45678	834
CASP1	FK866	-0.0715839	0.0511692	834
CASP1	FMK	-0.025423	0.740044	834
CASP1	FR-180204	-0.0697475	0.142958	834
CASP1	FTI-277	-0.04692	0.271522	834
CASP1	Foretinib	-0.100118	0.00905255	834
CASP1	GDC0449	-0.0486163	0.600238	834
CASP1	GDC0941	-0.0572481	0.27414	834
CASP1	GNF-2	-0.0388949	0.884146	834
CASP1	GSK-650394	-0.0732821	0.23504	834
CASP1	GSK1070916	-0.0780817	0.0344358	834
CASP1	GSK1904529A	0.0624634	0.162453	834
CASP1	GSK2126458	-0.0683797	0.0695652	834
CASP1	GSK269962A	-0.0542892	0.272773	834
CASP1	GSK429286A	-0.0529353	0.205381	834
CASP1	GSK690693	0.0242043	0.547824	834
CASP1	GW 441756	-0.103339	0.345659	834
CASP1	GW-2580	0.0468195	0.860233	834
CASP1	GW843682X	-0.147646	0.0451601	834
CASP1	Gefitinib	-0.157567	3.8046e-05	834
CASP1	Gemcitabine	-0.15105	0.000335757	834
CASP1	Genentech Cpd 10	-0.0444583	0.247402	834
CASP1	HG-5-113-01	-0.0671401	0.334826	834
CASP1	HG-5-88-01	-0.0334675	0.84834	834
CASP1	HG-6-64-1	-0.113408	0.00607047	834
CASP1	I-BET-762	-0.0893266	0.0110274	834
CASP1	IOX2	-0.0124216	0.86719	834
CASP1	IPA-3	-0.0712274	0.0698754	834
CASP1	Imatinib	-0.017749	0.926276	834
CASP1	Ispinesib Mesylate	-0.108237	0.00261464	834
CASP1	JNJ-26854165	-0.135314	0.00149741	834
CASP1	JNK Inhibitor VIII	0.0305467	0.501977	834
CASP1	JNK-9L	-0.134456	0.00299321	834
CASP1	JQ1	-0.138568	0.000329641	834
CASP1	JQ12	-0.0403996	0.468242	834
CASP1	JW-7-24-1	-0.097042	0.00638813	834
CASP1	JW-7-52-1	-0.140537	0.0712907	834
CASP1	KIN001-055	-0.0543073	0.35037	834
CASP1	KIN001-102	-0.054811	0.134091	834
CASP1	KIN001-135	0.0669392	0.508531	834
CASP1	KIN001-236	-0.0710423	0.0563113	834
CASP1	KIN001-244	-0.121961	0.000658948	834
CASP1	KIN001-260	-0.0963949	0.00733189	834
CASP1	KIN001-266	-0.0273961	0.599229	834
CASP1	KIN001-270	-0.0102699	0.827857	834
CASP1	KU-55933	-0.0601355	0.281293	834
CASP1	LAQ824	-0.0449154	0.274396	834
CASP1	LFM-A13	0.0346697	0.520478	834
CASP1	LY317615	-0.058827	0.172174	834
CASP1	Lapatinib	0.0244865	0.726008	834
CASP1	Lenalidomide	-0.0277763	0.751876	834
CASP1	Linifanib	-0.0964443	0.0261211	834
CASP1	Lisitinib	0.0642175	0.263865	834
CASP1	MG-132	-0.0867427	0.290287	834
CASP1	MK-2206	0.0583028	0.243952	834
CASP1	MLN4924	-0.16344	0.000900841	834
CASP1	MP470	0.0890065	0.0327287	834
CASP1	MPS-1-IN-1	-0.107267	0.00341608	834
CASP1	MS-275	-0.158301	0.0230167	834
CASP1	Masitinib	-0.0857701	0.0208082	834
CASP1	Methotrexate	-0.134282	0.000217841	834
CASP1	Midostaurin	-0.0785489	0.0647149	834
CASP1	Mitomycin C	-0.125425	0.00380217	834
CASP1	NG-25	-0.0852007	0.0179453	834
CASP1	NPK76-II-72-1	-0.0602207	0.0946695	834
CASP1	NSC-207895	0.0311392	0.5216	834
CASP1	NSC-87877	-0.00250993	0.975745	834
CASP1	NU-7441	-0.0286402	0.724147	834
CASP1	Navitoclax	0.0346733	0.381947	834
CASP1	Nilotinib	-0.0407058	0.444527	834
CASP1	Nutlin-3a (-)	-0.0704789	0.118625	834
CASP1	OSI-027	-0.0734092	0.0437041	834
CASP1	OSI-930	-0.0511724	0.196206	834
CASP1	OSU-03012	-0.104907	0.015984	834
CASP1	Obatoclax Mesylate	-0.136141	0.000848828	834
CASP1	Olaparib	-0.0557138	0.200106	834
CASP1	PAC-1	-0.033727	0.456703	834
CASP1	PD-0325901	-0.0768436	0.0530259	834
CASP1	PD-0332991	-0.0207209	0.752884	834
CASP1	PD-173074	0.0128528	0.952297	834
CASP1	PF-4708671	0.0041388	0.982165	834
CASP1	PF-562271	-0.099358	0.0416868	834
CASP1	PFI-1	-0.130574	0.00158079	834
CASP1	PHA-665752	-0.00312521	0.987164	834
CASP1	PHA-793887	-0.159873	3.40962e-06	834
CASP1	PI-103	-0.0816926	0.0241942	834
CASP1	PIK-93	-0.114254	0.00111091	834
CASP1	PLX4720	-0.06111	0.135883	834
CASP1	Paclitaxel	-0.209714	0.00870569	834
CASP1	Parthenolide	-0.122214	0.18081	834
CASP1	Pazopanib	0.000865634	0.991635	834
CASP1	Phenformin	-0.0838829	0.0230171	834
CASP1	Pyrimethamine	-0.0727971	0.517081	834
CASP1	QL-VIII-58	-0.14379	0.0196366	834
CASP1	QL-X-138	-0.0650698	0.0799163	834
CASP1	QL-XI-92	-0.115351	0.00117567	834
CASP1	QL-XII-47	-0.0733382	0.0610576	834
CASP1	QL-XII-61	-0.0320837	0.673447	834
CASP1	QS11	0.0105693	0.898263	834
CASP1	RDEA119	-0.124614	0.000418658	834
CASP1	RO-3306	-0.0981156	0.015774	834
CASP1	Rapamycin	-0.119168	0.219524	834
CASP1	Roscovitine	-0.131377	0.298317	834
CASP1	Ruxolitinib	-0.0392376	0.455683	834
CASP1	S-Trityl-L-cysteine	-0.23494	0.000605408	834
CASP1	SB 216763	-0.00779853	0.893662	834
CASP1	SB 505124	0.045122	0.537712	834
CASP1	SB52334	0.0926325	0.0256162	834
CASP1	SB590885	-0.0218213	0.692816	834
CASP1	SGC0946	0.0328336	0.56499	834
CASP1	SL 0101-1	0.0143068	0.8799	834
CASP1	SN-38	-0.160907	2.1851e-05	834
CASP1	SNX-2112	-0.184516	1.14306e-07	834
CASP1	STF-62247	-0.0487878	0.234969	834
CASP1	Salubrinal	-0.102969	0.192255	834
CASP1	Saracatinib	-0.0220372	0.820451	834
CASP1	Shikonin	-0.119974	0.0074052	834
CASP1	Sorafenib	-0.168577	0.0241436	834
CASP1	Sunitinib	-0.240056	5.8356e-05	834
CASP1	T0901317	-0.0278376	0.530188	834
CASP1	TAE684	-0.197506	0.00580399	834
CASP1	TAK-715	-0.0513957	0.16888	834
CASP1	TG101348	-0.125105	0.000372335	834
CASP1	TGX221	-0.067919	0.30282	834
CASP1	THZ-2-102-1	-0.0926506	0.0102068	834
CASP1	THZ-2-49	-0.0856878	0.01949	834
CASP1	TL-1-85	-0.106116	0.00296507	834
CASP1	TL-2-105	0.00814514	0.849895	834
CASP1	TPCA-1	-0.0969705	0.00608769	834
CASP1	TW 37	-0.00497426	0.935191	834
CASP1	Talazoparib	-0.0626019	0.153564	834
CASP1	Tamoxifen	-0.061103	0.548182	834
CASP1	Temozolomide	-0.187171	3.2944e-06	834
CASP1	Temsirolimus	-0.0884066	0.0442317	834
CASP1	Thapsigargin	-0.0395297	0.551649	834
CASP1	Tipifarnib	-0.0935501	0.0744012	834
CASP1	Tivozanib	0.0168902	0.811345	834
CASP1	Trametinib	-0.0653449	0.0837764	834
CASP1	Tubastatin A	-0.0665786	0.0663558	834
CASP1	UNC0638	-0.104325	0.00277555	834
CASP1	UNC1215	0.0190591	0.746995	834
CASP1	VNLG/124	-0.157951	2.0069e-05	834
CASP1	VX-11e	-0.0602464	0.187138	834
CASP1	VX-680	-0.195144	0.0077608	834
CASP1	VX-702	0.00527078	0.986254	834
CASP1	Veliparib	0.00158471	0.986855	834
CASP1	Vinblastine	-0.2023	1.48017e-07	834
CASP1	Vinorelbine	-0.131088	0.0042522	834
CASP1	Vorinostat	-0.0398738	0.29787	834
CASP1	WH-4-023	-0.0300562	0.736641	834
CASP1	WZ-1-84	-0.0731219	0.346338	834
CASP1	WZ3105	-0.0435938	0.240539	834
CASP1	XAV939	-0.0318248	0.441525	834
CASP1	XL-184	-0.0876461	0.0385764	834
CASP1	XMD11-85h	-0.109295	0.363693	834
CASP1	XMD13-2	-0.156681	6.89834e-06	834
CASP1	XMD14-99	-0.139606	0.000114011	834
CASP1	XMD15-27	-0.125195	0.0020431	834
CASP1	XMD8-85	-0.138536	0.0493331	834
CASP1	XMD8-92	-0.130552	0.104475	834
CASP1	Y-39983	-0.100445	0.0060416	834
CASP1	YK 4-279	-0.186001	1.2187e-05	834
CASP1	YM155	-0.0974183	0.0290204	834
CASP1	YM201636	0.00390894	0.928856	834
CASP1	Z-LLNle-CHO	-0.243908	4.1965e-05	834
CASP1	ZG-10	-0.0856048	0.174486	834
CASP1	ZM-447439	-0.0322654	0.5216	834
CASP1	ZSTK474	-0.0760315	0.0372236	834
CASP1	Zibotentan	0.0507495	0.806359	834
CASP1	piperlongumine	-0.10474	0.00836061	834
CASP1	rTRAIL	-0.0338458	0.662668	834
CASP1	selumetinib	-0.117476	0.000978307	834
CASP3	(5Z)-7-Oxozeaenol	0.0134657	0.787689	836
CASP3	17-AAG	0.153489	2.3114e-05	836
CASP3	5-Fluorouracil	-0.200934	7.6462e-09	836
CASP3	681640	0.0535173	0.364783	836
CASP3	A-443654	-0.0344009	0.868721	836
CASP3	A-770041	-0.028557	0.765364	836
CASP3	AC220	-0.0727769	0.0969589	836
CASP3	AG-014699	0.0939336	0.0209718	836
CASP3	AICAR	-0.168194	7.43731e-06	836
CASP3	AKT inhibitor VIII	0.08011	0.0628405	836
CASP3	AMG-706	0.0576662	0.305894	836
CASP3	AP-24534	-0.133935	0.000441798	836
CASP3	AR-42	-0.217406	2.5882e-10	836
CASP3	AS601245	0.0256284	0.674587	836
CASP3	AS605240	-0.0741577	0.0709534	836
CASP3	AT-7519	-0.242557	9.84116e-13	836
CASP3	ATRA	-0.0751225	0.0986226	836
CASP3	AUY922	-0.0685872	0.155875	836
CASP3	AZ628	0.0662646	0.383037	836
CASP3	AZD6482	-0.0288516	0.579484	836
CASP3	AZD7762	-0.192452	2.27219e-07	836
CASP3	AZD8055	-0.228716	4.86704e-10	836
CASP3	Afatinib	0.140777	6.6851e-05	836
CASP3	Axitinib	-0.0916719	0.0464268	836
CASP3	BAY 61-3606	-0.173576	4.04833e-06	836
CASP3	BEZ235	-0.0668725	0.147001	836
CASP3	BHG712	-0.231408	1.40242e-11	836
CASP3	BI-2536	-0.0840804	0.381034	836
CASP3	BIRB 0796	0.0807836	0.0913146	836
CASP3	BIX02189	-0.209305	1.42745e-09	836
CASP3	BMS-509744	0.0125894	0.913059	836
CASP3	BMS-536924	0.00216565	0.982466	836
CASP3	BMS-708163	0.0992692	0.0106546	836
CASP3	BMS-754807	0.0715783	0.156359	836
CASP3	BMS345541	-0.211473	7.3119e-10	836
CASP3	BX-795	-0.138841	0.000514511	836
CASP3	BX-912	-0.264091	4.29748e-15	836
CASP3	Belinostat	-0.18453	1.94674e-07	836
CASP3	Bexarotene	0.00787398	0.946835	836
CASP3	Bicalutamide	0.105701	0.00989323	836
CASP3	Bleomycin	-0.0509887	0.349552	836
CASP3	Bleomycin (50 uM)	0.0646349	0.0780036	836
CASP3	Bortezomib	-0.0440823	0.613035	836
CASP3	Bosutinib	-0.0946671	0.0364735	836
CASP3	Bryostatin 1	0.128578	0.00421967	836
CASP3	CAL-101	-0.200642	1.02998e-08	836
CASP3	CAY10603	-0.223936	6.19225e-11	836
CASP3	CCT007093	0.151908	0.000122171	836
CASP3	CCT018159	-0.00955193	0.886769	836
CASP3	CEP-701	-0.212059	9.03286e-09	836
CASP3	CGP-082996	0.0151406	0.905197	836
CASP3	CGP-60474	-0.131718	0.0662277	836
CASP3	CH5424802	-0.0881979	0.067722	836
CASP3	CHIR-99021	0.0196306	0.646655	836
CASP3	CI-1040	0.048573	0.27768	836
CASP3	CMK	-0.0790954	0.462438	836
CASP3	CP466722	-0.282758	3.9943e-17	836
CASP3	CP724714	0.01621	0.805847	836
CASP3	CUDC-101	-0.198532	1.42523e-08	836
CASP3	CX-5461	-0.215435	4.84001e-10	836
CASP3	Camptothecin	-0.17444	6.1821e-06	836
CASP3	Cetuximab	0.152834	5.0296e-05	836
CASP3	Cisplatin	0.0509092	0.302694	836
CASP3	Crizotinib	-0.139993	0.126858	836
CASP3	Cyclopamine	-0.00526173	0.970438	836
CASP3	Cytarabine	-0.0807948	0.0797513	836
CASP3	DMOG	-0.151749	9.7243e-05	836
CASP3	Dabrafenib	-0.011659	0.818493	836
CASP3	Dasatinib	0.0290893	0.698095	836
CASP3	Docetaxel	0.149194	4.7178e-05	836
CASP3	Doxorubicin	-0.10516	0.0431136	836
CASP3	EHT 1864	0.033692	0.635522	836
CASP3	EKB-569	-0.102005	0.0074983	836
CASP3	EX-527	0.0361931	0.741602	836
CASP3	Elesclomol	0.0183685	0.719116	836
CASP3	Embelin	-0.0160309	0.829979	836
CASP3	Epothilone B	0.0102694	0.873277	836
CASP3	Erlotinib	0.178456	0.0062759	836
CASP3	Etoposide	-0.146971	0.000299945	836
CASP3	FH535	0.0584301	0.209235	836
CASP3	FK866	-0.201448	6.5349e-09	836
CASP3	FMK	-0.0577728	0.365499	836
CASP3	FR-180204	-0.0421051	0.426777	836
CASP3	FTI-277	0.0773662	0.0572038	836
CASP3	Foretinib	-0.132773	0.000361825	836
CASP3	GDC0449	0.0481043	0.607451	836
CASP3	GDC0941	-0.0430421	0.446387	836
CASP3	GNF-2	0.0243612	0.931983	836
CASP3	GSK-650394	-0.0592026	0.37032	836
CASP3	GSK1070916	-0.194085	2.78191e-08	836
CASP3	GSK1904529A	0.109383	0.00945462	836
CASP3	GSK2126458	-0.161988	5.19492e-06	836
CASP3	GSK269962A	-0.0466625	0.361629	836
CASP3	GSK429286A	-0.195207	8.09149e-08	836
CASP3	GSK690693	-0.18871	6.27786e-08	836
CASP3	GW 441756	-0.00612838	0.990735	836
CASP3	GW-2580	0.0084382	0.994893	836
CASP3	GW843682X	-0.120532	0.116123	836
CASP3	Gefitinib	0.128561	0.00096656	836
CASP3	Gemcitabine	-0.11572	0.0071133	836
CASP3	Genentech Cpd 10	-0.225478	5.8642e-11	836
CASP3	HG-5-113-01	-0.06879	0.321199	836
CASP3	HG-5-88-01	-0.113457	0.244436	836
CASP3	HG-6-64-1	-0.0685369	0.128333	836
CASP3	I-BET-762	-0.324445	7.61449e-23	836
CASP3	IOX2	0.0263523	0.681225	836
CASP3	IPA-3	-0.174472	2.13527e-06	836
CASP3	Imatinib	-0.0318114	0.856874	836
CASP3	Ispinesib Mesylate	-0.222665	1.03911e-10	836
CASP3	JNJ-26854165	-0.015566	0.801356	836
CASP3	JNK Inhibitor VIII	0.145438	0.000223858	836
CASP3	JNK-9L	-0.0447664	0.430317	836
CASP3	JQ1	-0.0724846	0.0790001	836
CASP3	JQ12	-0.042731	0.438649	836
CASP3	JW-7-24-1	-0.219957	1.1805e-10	836
CASP3	JW-7-52-1	-0.0800337	0.390612	836
CASP3	KIN001-055	0.0324824	0.636378	836
CASP3	KIN001-102	-0.248669	2.12834e-13	836
CASP3	KIN001-135	0.131785	0.12924	836
CASP3	KIN001-236	-0.229002	3.57052e-11	836
CASP3	KIN001-244	-0.229383	3.37751e-11	836
CASP3	KIN001-260	-0.237956	3.81852e-12	836
CASP3	KIN001-266	-0.0732099	0.104456	836
CASP3	KIN001-270	-0.227552	2.40822e-10	836
CASP3	KU-55933	-0.0180239	0.811931	836
CASP3	LAQ824	-0.131027	0.000483032	836
CASP3	LFM-A13	0.0343057	0.526496	836
CASP3	LY317615	-0.103647	0.00972978	836
CASP3	Lapatinib	0.122465	0.0462792	836
CASP3	Lenalidomide	-0.0759287	0.212937	836
CASP3	Linifanib	-0.0530244	0.285345	836
CASP3	Lisitinib	0.06478	0.258175	836
CASP3	MG-132	-0.0227596	0.842005	836
CASP3	MK-2206	-0.137948	0.00187681	836
CASP3	MLN4924	0.00216145	0.977466	836
CASP3	MP470	-0.0706123	0.0950394	836
CASP3	MPS-1-IN-1	-0.125302	0.000559048	836
CASP3	MS-275	-0.196149	0.00424739	836
CASP3	Masitinib	-0.208454	2.65404e-09	836
CASP3	Methotrexate	-0.27176	8.49877e-15	836
CASP3	Midostaurin	0.00692072	0.899613	836
CASP3	Mitomycin C	-0.122787	0.00465286	836
CASP3	NG-25	-0.228003	2.37884e-11	836
CASP3	NPK76-II-72-1	-0.28464	1.25102e-17	836
CASP3	NSC-207895	-0.0930374	0.0233333	836
CASP3	NSC-87877	0.0640684	0.228275	836
CASP3	NU-7441	-0.0289952	0.721002	836
CASP3	Navitoclax	-0.186036	2.11777e-07	836
CASP3	Nilotinib	-0.123279	0.00426426	836
CASP3	Nutlin-3a (-)	-0.152949	0.00017129	836
CASP3	OSI-027	-0.205812	2.72821e-09	836
CASP3	OSI-930	-0.133615	0.000270947	836
CASP3	OSU-03012	-0.0749145	0.102655	836
CASP3	Obatoclax Mesylate	-0.0608116	0.185831	836
CASP3	Olaparib	0.0529835	0.225962	836
CASP3	PAC-1	-0.153545	6.1693e-05	836
CASP3	PD-0325901	0.141654	0.000181039	836
CASP3	PD-0332991	-0.0472335	0.393196	836
CASP3	PD-173074	-0.0330629	0.834732	836
CASP3	PF-4708671	0.0423923	0.665521	836
CASP3	PF-562271	0.036097	0.540029	836
CASP3	PFI-1	-0.0866242	0.0477182	836
CASP3	PHA-665752	0.0642342	0.653562	836
CASP3	PHA-793887	-0.255261	3.18465e-14	836
CASP3	PI-103	-0.19611	1.55823e-08	836
CASP3	PIK-93	-0.285845	1.17257e-17	836
CASP3	PLX4720	0.023699	0.601655	836
CASP3	Paclitaxel	-0.025689	0.85289	836
CASP3	Parthenolide	-0.107204	0.249966	836
CASP3	Pazopanib	0.0460872	0.403604	836
CASP3	Phenformin	-0.133475	0.00021286	836
CASP3	Pyrimethamine	-0.00880274	0.955868	836
CASP3	QL-VIII-58	-0.0392058	0.640126	836
CASP3	QL-X-138	-0.214912	5.70668e-10	836
CASP3	QL-XI-92	-0.237567	3.59796e-12	836
CASP3	QL-XII-47	-0.19317	1.03309e-07	836
CASP3	QL-XII-61	-0.205697	0.000171469	836
CASP3	QS11	-0.0596351	0.307007	836
CASP3	RDEA119	0.12452	0.000423127	836
CASP3	RO-3306	0.102464	0.011495	836
CASP3	Rapamycin	-0.0528672	0.670177	836
CASP3	Roscovitine	-0.0427811	0.81953	836
CASP3	Ruxolitinib	-0.169395	1.3522e-05	836
CASP3	S-Trityl-L-cysteine	-0.174835	0.0125277	836
CASP3	SB 216763	0.107778	0.0194714	836
CASP3	SB 505124	0.0439447	0.549231	836
CASP3	SB52334	0.00924379	0.88228	836
CASP3	SB590885	0.0320561	0.544305	836
CASP3	SGC0946	0.104276	0.0194198	836
CASP3	SL 0101-1	0.0594845	0.420816	836
CASP3	SN-38	-0.115585	0.00308332	836
CASP3	SNX-2112	-0.255975	6.59999e-14	836
CASP3	STF-62247	-0.167732	6.68635e-06	836
CASP3	Salubrinal	-0.107551	0.169846	836
CASP3	Saracatinib	0.0243214	0.799943	836
CASP3	Shikonin	-0.104343	0.0223855	836
CASP3	Sorafenib	0.00100212	0.995542	836
CASP3	Sunitinib	-0.127207	0.0560453	836
CASP3	T0901317	-0.153671	3.742e-05	836
CASP3	TAE684	-0.0480443	0.685968	836
CASP3	TAK-715	-0.206324	2.60663e-09	836
CASP3	TG101348	-0.263925	5.42701e-15	836
CASP3	TGX221	0.136403	0.0258653	836
CASP3	THZ-2-102-1	-0.216326	3.81779e-10	836
CASP3	THZ-2-49	-0.168275	2.04598e-06	836
CASP3	TL-1-85	-0.231723	1.17298e-11	836
CASP3	TL-2-105	-0.161057	5.69553e-06	836
CASP3	TPCA-1	-0.301911	1.16634e-19	836
CASP3	TW 37	-0.0705461	0.102145	836
CASP3	Talazoparib	-0.0515587	0.252367	836
CASP3	Tamoxifen	-0.0122311	0.93995	836
CASP3	Temozolomide	-0.0917198	0.0800931	836
CASP3	Temsirolimus	-0.158218	8.4649e-05	836
CASP3	Thapsigargin	0.000771147	0.994168	836
CASP3	Tipifarnib	-0.0555532	0.363063	836
CASP3	Tivozanib	-0.055415	0.307419	836
CASP3	Trametinib	0.164818	3.27627e-06	836
CASP3	Tubastatin A	-0.217701	1.94362e-10	836
CASP3	UNC0638	-0.206692	7.46911e-10	836
CASP3	UNC1215	0.112068	0.011861	836
CASP3	VNLG/124	-0.0780399	0.049806	836
CASP3	VX-11e	-0.0219578	0.688195	836
CASP3	VX-680	-0.106252	0.204034	836
CASP3	VX-702	0.00592737	0.985975	836
CASP3	Veliparib	0.0877827	0.150519	836
CASP3	Vinblastine	-0.140096	0.000400278	836
CASP3	Vinorelbine	-0.0625407	0.225157	836
CASP3	Vorinostat	-0.239636	1.1257e-11	836
CASP3	WH-4-023	0.0289464	0.748515	836
CASP3	WZ-1-84	0.0716672	0.357503	836
CASP3	WZ3105	-0.176062	3.3224e-07	836
CASP3	XAV939	0.119819	0.00139112	836
CASP3	XL-184	-0.0927139	0.0271707	836
CASP3	XMD11-85h	-0.0159313	0.943086	836
CASP3	XMD13-2	-0.238679	2.39705e-12	836
CASP3	XMD14-99	-0.191043	7.09335e-08	836
CASP3	XMD15-27	-0.136475	0.000694875	836
CASP3	XMD8-85	-0.138832	0.0487975	836
CASP3	XMD8-92	-0.0623062	0.553362	836
CASP3	Y-39983	-0.245911	1.208e-12	836
CASP3	YK 4-279	-0.0435714	0.427104	836
CASP3	YM155	-0.0325446	0.561755	836
CASP3	YM201636	-0.19825	1.19465e-08	836
CASP3	Z-LLNle-CHO	-0.12545	0.0597015	836
CASP3	ZG-10	-0.0829627	0.190823	836
CASP3	ZM-447439	-0.133951	0.00103635	836
CASP3	ZSTK474	-0.227086	4.12886e-11	836
CASP3	Zibotentan	-0.000176314	0.999995	836
CASP3	piperlongumine	-0.0126214	0.809586	836
CASP3	rTRAIL	0.0286728	0.723611	836
CASP3	selumetinib	0.142318	5.1308e-05	836
CASP4	(5Z)-7-Oxozeaenol	-0.152355	3.4734e-05	837
CASP4	17-AAG	-0.277254	3.37305e-15	837
CASP4	5-Fluorouracil	0.0233886	0.554493	837
CASP4	681640	-0.0615986	0.289457	837
CASP4	A-443654	-0.077918	0.612138	837
CASP4	A-770041	-0.160655	0.0176133	837
CASP4	AC220	0.0206429	0.711592	837
CASP4	AG-014699	-0.00758245	0.881361	837
CASP4	AICAR	-0.0348424	0.410889	837
CASP4	AKT inhibitor VIII	-0.0957405	0.023266	837
CASP4	AMG-706	-0.0529865	0.359497	837
CASP4	AP-24534	-0.0718196	0.0763735	837
CASP4	AR-42	0.149839	1.8767e-05	837
CASP4	AS601245	-0.149623	0.000539128	837
CASP4	AS605240	-0.0669759	0.107292	837
CASP4	AT-7519	0.0630415	0.0833617	837
CASP4	ATRA	0.0113204	0.854312	837
CASP4	AUY922	-0.150393	0.000336349	837
CASP4	AZ628	-0.273594	2.42138e-06	837
CASP4	AZD6482	-0.0534489	0.236873	837
CASP4	AZD7762	-0.0189322	0.678328	837
CASP4	AZD8055	0.0657525	0.0986453	837
CASP4	Afatinib	-0.185241	8.73614e-08	837
CASP4	Axitinib	0.0326009	0.566658	837
CASP4	BAY 61-3606	0.0165276	0.720544	837
CASP4	BEZ235	-0.0458045	0.354718	837
CASP4	BHG712	-0.024461	0.532645	837
CASP4	BI-2536	-0.128158	0.145942	837
CASP4	BIRB 0796	-0.0721874	0.137278	837
CASP4	BIX02189	0.0197748	0.622964	837
CASP4	BMS-509744	-0.143712	0.0808681	837
CASP4	BMS-536924	-0.0202575	0.808067	837
CASP4	BMS-708163	-0.0885261	0.0238046	837
CASP4	BMS-754807	0.0217746	0.726656	837
CASP4	BMS345541	0.120315	0.000655804	837
CASP4	BX-795	8.3813e-05	0.998775	837
CASP4	BX-912	0.146558	2.4417e-05	837
CASP4	Belinostat	0.122214	0.00075334	837
CASP4	Bexarotene	-0.105039	0.0439567	837
CASP4	Bicalutamide	-0.0778747	0.06614	837
CASP4	Bleomycin	-0.145025	0.000909128	837
CASP4	Bleomycin (50 uM)	-0.209265	1.60277e-09	837
CASP4	Bortezomib	-0.205828	0.00113483	837
CASP4	Bosutinib	-0.162472	9.2072e-05	837
CASP4	Bryostatin 1	-0.0845709	0.0723922	837
CASP4	CAL-101	0.0359609	0.368132	837
CASP4	CAY10603	0.157485	6.23664e-06	837
CASP4	CCT007093	-0.0899154	0.0282947	837
CASP4	CCT018159	-0.116957	0.00822893	837
CASP4	CEP-701	0.0302358	0.492534	837
CASP4	CGP-082996	-0.174776	0.0140167	837
CASP4	CGP-60474	-0.177562	0.00901663	837
CASP4	CH5424802	-0.0854301	0.0792972	837
CASP4	CHIR-99021	-0.0992961	0.00715721	837
CASP4	CI-1040	-0.263144	1.26285e-12	837
CASP4	CMK	-0.00458296	0.977087	837
CASP4	CP466722	0.112893	0.00140728	837
CASP4	CP724714	-0.0332438	0.563473	837
CASP4	CUDC-101	0.113551	0.0016603	837
CASP4	CX-5461	0.113391	0.00158519	837
CASP4	Camptothecin	0.0229904	0.648182	837
CASP4	Cetuximab	-0.164345	1.1805e-05	837
CASP4	Cisplatin	-0.0138584	0.818626	837
CASP4	Crizotinib	-0.219448	0.00136111	837
CASP4	Cyclopamine	-0.091769	0.33346	837
CASP4	Cytarabine	-0.0543731	0.272553	837
CASP4	DMOG	-0.122875	0.00211405	837
CASP4	Dabrafenib	-0.13291	0.000584422	837
CASP4	Dasatinib	-0.255827	1.1843e-05	837
CASP4	Docetaxel	-0.160276	1.1615e-05	837
CASP4	Doxorubicin	-0.0659125	0.24921	837
CASP4	EHT 1864	0.0561137	0.358016	837
CASP4	EKB-569	-0.0931218	0.0155588	837
CASP4	EX-527	0.000978025	0.994773	837
CASP4	Elesclomol	-0.0128536	0.805549	837
CASP4	Embelin	-0.0735545	0.154449	837
CASP4	Epothilone B	-0.133685	0.00233423	837
CASP4	Erlotinib	-0.0969221	0.176117	837
CASP4	Etoposide	-0.00305238	0.962605	837
CASP4	FH535	-0.0469165	0.333702	837
CASP4	FK866	0.20722	2.25016e-09	837
CASP4	FMK	-0.0490421	0.461135	837
CASP4	FR-180204	-0.0984851	0.0275518	837
CASP4	FTI-277	-0.148209	0.000133601	837
CASP4	Foretinib	0.0488828	0.245659	837
CASP4	GDC0449	-0.0329743	0.756857	837
CASP4	GDC0941	-0.0288074	0.644744	837
CASP4	GNF-2	-0.141948	0.220107	837
CASP4	GSK-650394	-0.0711443	0.25237	837
CASP4	GSK1070916	0.153775	1.4236e-05	837
CASP4	GSK1904529A	-0.037788	0.428187	837
CASP4	GSK2126458	0.0630962	0.096032	837
CASP4	GSK269962A	-0.0219429	0.716241	837
CASP4	GSK429286A	0.0659008	0.105129	837
CASP4	GSK690693	0.196097	1.74419e-08	837
CASP4	GW 441756	-0.0607151	0.680119	837
CASP4	GW-2580	-0.00694783	0.994893	837
CASP4	GW843682X	-0.111416	0.153157	837
CASP4	Gefitinib	-0.208944	1.98569e-08	837
CASP4	Gemcitabine	-0.119686	0.00517114	837
CASP4	Genentech Cpd 10	0.13882	8.8576e-05	837
CASP4	HG-5-113-01	0.0444854	0.558401	837
CASP4	HG-5-88-01	-0.0166129	0.933771	837
CASP4	HG-6-64-1	-0.123801	0.0023522	837
CASP4	I-BET-762	0.126523	0.000259147	837
CASP4	IOX2	-0.0231951	0.725818	837
CASP4	IPA-3	0.0501629	0.215249	837
CASP4	Imatinib	-0.113738	0.264771	837
CASP4	Ispinesib Mesylate	0.102523	0.00446953	837
CASP4	JNJ-26854165	-0.145167	0.000597428	837
CASP4	JNK Inhibitor VIII	-0.0955525	0.0192857	837
CASP4	JNK-9L	-0.0692061	0.177222	837
CASP4	JQ1	-0.00568375	0.919334	837
CASP4	JQ12	0.0211137	0.734865	837
CASP4	JW-7-24-1	0.116661	0.000942127	837
CASP4	JW-7-52-1	-0.182398	0.0115364	837
CASP4	KIN001-055	-0.108214	0.0239145	837
CASP4	KIN001-102	0.113171	0.00128265	837
CASP4	KIN001-135	0.0278909	0.82364	837
CASP4	KIN001-236	0.07084	0.0570712	837
CASP4	KIN001-244	0.0601243	0.108627	837
CASP4	KIN001-260	0.0751198	0.0393746	837
CASP4	KIN001-266	0.0817423	0.0658497	837
CASP4	KIN001-270	0.162289	9.29935e-06	837
CASP4	KU-55933	-0.0462292	0.443273	837
CASP4	LAQ824	0.0807445	0.0384887	837
CASP4	LFM-A13	-0.0485612	0.338448	837
CASP4	LY317615	-0.0445138	0.319454	837
CASP4	Lapatinib	-0.120623	0.0500665	837
CASP4	Lenalidomide	-0.00979382	0.928657	837
CASP4	Linifanib	-0.0496322	0.326478	837
CASP4	Lisitinib	0.0468045	0.458761	837
CASP4	MG-132	-0.102958	0.187351	837
CASP4	MK-2206	0.0776346	0.106654	837
CASP4	MLN4924	-0.110134	0.0299891	837
CASP4	MP470	0.138092	0.000955529	837
CASP4	MPS-1-IN-1	0.0741088	0.0487297	837
CASP4	MS-275	-0.0221268	0.827113	837
CASP4	Masitinib	0.0162375	0.702429	837
CASP4	Methotrexate	0.112599	0.0021108	837
CASP4	Midostaurin	-0.112383	0.00593399	837
CASP4	Mitomycin C	-0.0532517	0.289673	837
CASP4	NG-25	0.0642772	0.0794051	837
CASP4	NPK76-II-72-1	0.180898	1.17439e-07	837
CASP4	NSC-207895	0.16512	2.4445e-05	837
CASP4	NSC-87877	-0.057102	0.288344	837
CASP4	NU-7441	-0.0595185	0.365755	837
CASP4	Navitoclax	0.1753	1.08874e-06	837
CASP4	Nilotinib	-0.0679438	0.157854	837
CASP4	Nutlin-3a (-)	-0.00537914	0.930857	837
CASP4	OSI-027	0.143833	4.4635e-05	837
CASP4	OSI-930	-0.00102118	0.983448	837
CASP4	OSU-03012	-0.0631178	0.181691	837
CASP4	Obatoclax Mesylate	-0.0380638	0.439916	837
CASP4	Olaparib	-0.0240126	0.614972	837
CASP4	PAC-1	0.0326071	0.473374	837
CASP4	PD-0325901	-0.28317	4.95126e-15	837
CASP4	PD-0332991	-0.0526271	0.329806	837
CASP4	PD-173074	0.00702046	0.981163	837
CASP4	PF-4708671	-0.0398866	0.695604	837
CASP4	PF-562271	-0.0885051	0.075187	837
CASP4	PFI-1	-0.0431159	0.378744	837
CASP4	PHA-665752	-0.0833728	0.544094	837
CASP4	PHA-793887	0.0800224	0.0240751	837
CASP4	PI-103	0.145676	3.4889e-05	837
CASP4	PIK-93	0.136675	8.4259e-05	837
CASP4	PLX4720	-0.0861561	0.028674	837
CASP4	Paclitaxel	-0.175312	0.0275059	837
CASP4	Parthenolide	-0.0688592	0.491908	837
CASP4	Pazopanib	-0.0177675	0.783494	837
CASP4	Phenformin	0.0653078	0.0815597	837
CASP4	Pyrimethamine	-0.0944547	0.371324	837
CASP4	QL-VIII-58	-0.0420457	0.611577	837
CASP4	QL-X-138	0.15801	7.53809e-06	837
CASP4	QL-XI-92	0.033245	0.390125	837
CASP4	QL-XII-47	0.099687	0.00914511	837
CASP4	QL-XII-61	0.102343	0.0925522	837
CASP4	QS11	0.0158297	0.839199	837
CASP4	RDEA119	-0.306303	2.46817e-20	837
CASP4	RO-3306	-0.124718	0.00187676	837
CASP4	Rapamycin	-0.100981	0.31944	837
CASP4	Roscovitine	-0.0581053	0.730761	837
CASP4	Ruxolitinib	0.00484463	0.94369	837
CASP4	S-Trityl-L-cysteine	-0.113051	0.125954	837
CASP4	SB 216763	-0.101872	0.02834	837
CASP4	SB 505124	0.109431	0.0541651	837
CASP4	SB52334	0.206694	3.55163e-08	837
CASP4	SB590885	-0.0811864	0.0792899	837
CASP4	SGC0946	-0.0266596	0.656046	837
CASP4	SL 0101-1	-0.0642926	0.377822	837
CASP4	SN-38	-0.0543369	0.213287	837
CASP4	SNX-2112	0.0428716	0.261094	837
CASP4	STF-62247	0.0310477	0.473985	837
CASP4	Salubrinal	-0.0226906	0.824161	837
CASP4	Saracatinib	-0.18644	0.00957885	837
CASP4	Shikonin	0.010674	0.870785	837
CASP4	Sorafenib	-0.138445	0.0879581	837
CASP4	Sunitinib	-0.237761	7.1854e-05	837
CASP4	T0901317	0.0562337	0.170732	837
CASP4	TAE684	-0.216031	0.00157253	837
CASP4	TAK-715	0.0766484	0.0354482	837
CASP4	TG101348	0.0435017	0.245328	837
CASP4	TGX221	-0.127762	0.0385501	837
CASP4	THZ-2-102-1	0.17773	3.59719e-07	837
CASP4	THZ-2-49	0.00893273	0.834657	837
CASP4	TL-1-85	0.0253724	0.518527	837
CASP4	TL-2-105	0.0902557	0.0140736	837
CASP4	TPCA-1	0.113314	0.00123387	837
CASP4	TW 37	0.109322	0.00626864	837
CASP4	Talazoparib	-0.0157311	0.764373	837
CASP4	Tamoxifen	-0.0160782	0.9143	837
CASP4	Temozolomide	-0.1052	0.0332213	837
CASP4	Temsirolimus	-0.0305311	0.57169	837
CASP4	Thapsigargin	-0.0500049	0.417237	837
CASP4	Tipifarnib	-0.108391	0.0301164	837
CASP4	Tivozanib	-0.00350649	0.964756	837
CASP4	Trametinib	-0.320584	2.20186e-21	837
CASP4	Tubastatin A	0.141779	5.0265e-05	837
CASP4	UNC0638	0.122125	0.000407622	837
CASP4	UNC1215	-0.0489186	0.331254	837
CASP4	VNLG/124	-0.0353436	0.420505	837
CASP4	VX-11e	-0.141085	0.000473433	837
CASP4	VX-680	-0.108771	0.192261	837
CASP4	VX-702	0.000291971	0.999137	837
CASP4	Veliparib	-0.0951661	0.119419	837
CASP4	Vinblastine	-0.00939289	0.862968	837
CASP4	Vinorelbine	-0.0259823	0.672525	837
CASP4	Vorinostat	0.239227	1.22132e-11	837
CASP4	WH-4-023	-0.167796	0.0111967	837
CASP4	WZ-1-84	-0.204253	0.00153525	837
CASP4	WZ3105	0.138501	7.1774e-05	837
CASP4	XAV939	-0.166906	5.34909e-06	837
CASP4	XL-184	-0.0442377	0.352791	837
CASP4	XMD11-85h	-0.0391311	0.83737	837
CASP4	XMD13-2	0.0933512	0.0090508	837
CASP4	XMD14-99	0.000734926	0.987556	837
CASP4	XMD15-27	-0.0131027	0.817749	837
CASP4	XMD8-85	-0.140606	0.0454227	837
CASP4	XMD8-92	-0.0696799	0.490078	837
CASP4	Y-39983	0.0654888	0.08267	837
CASP4	YK 4-279	-0.0780148	0.109776	837
CASP4	YM155	0.000109644	0.998707	837
CASP4	YM201636	0.178041	3.62266e-07	837
CASP4	Z-LLNle-CHO	-0.257401	1.3982e-05	837
CASP4	ZG-10	0.10984	0.0687688	837
CASP4	ZM-447439	0.0371009	0.450966	837
CASP4	ZSTK474	0.0789095	0.0301758	837
CASP4	Zibotentan	-0.0167621	0.96343	837
CASP4	piperlongumine	-0.0661375	0.116429	837
CASP4	rTRAIL	-0.114958	0.0431939	837
CASP4	selumetinib	-0.25662	3.25808e-14	837
CASP5	(5Z)-7-Oxozeaenol	0.0597756	0.144165	838
CASP5	17-AAG	0.0265443	0.507323	838
CASP5	5-Fluorouracil	-0.0986454	0.00633552	838
CASP5	681640	0.0889585	0.111464	838
CASP5	A-443654	0.0762711	0.621629	838
CASP5	A-770041	0.0291556	0.759585	838
CASP5	AC220	-0.0201304	0.720079	838
CASP5	AG-014699	0.0408721	0.353351	838
CASP5	AICAR	0.00738326	0.873758	838
CASP5	AKT inhibitor VIII	0.00598519	0.916201	838
CASP5	AMG-706	0.0419627	0.494284	838
CASP5	AP-24534	-0.0154389	0.747915	838
CASP5	AR-42	-0.0370488	0.324848	838
CASP5	AS601245	0.052186	0.324232	838
CASP5	AS605240	-0.00306248	0.956976	838
CASP5	AT-7519	-0.0302967	0.426702	838
CASP5	ATRA	0.019631	0.730546	838
CASP5	AUY922	0.0617405	0.209148	838
CASP5	AZ628	0.0250139	0.777362	838
CASP5	AZD6482	0.0453057	0.331857	838
CASP5	AZD7762	0.0724112	0.07087	838
CASP5	AZD8055	0.0703351	0.0755938	838
CASP5	Afatinib	-0.0336336	0.392843	838
CASP5	Axitinib	0.0474677	0.365888	838
CASP5	BAY 61-3606	-0.00726558	0.883599	838
CASP5	BEZ235	0.0923286	0.0355123	838
CASP5	BHG712	-0.00722741	0.86144	838
CASP5	BI-2536	0.06731	0.506757	838
CASP5	BIRB 0796	0.0511842	0.317518	838
CASP5	BIX02189	0.00182229	0.966363	838
CASP5	BMS-509744	0.06794	0.456615	838
CASP5	BMS-536924	0.0379628	0.589963	838
CASP5	BMS-708163	0.041513	0.316986	838
CASP5	BMS-754807	-0.00901959	0.89584	838
CASP5	BMS345541	-0.0373529	0.324261	838
CASP5	BX-795	0.0841038	0.0488654	838
CASP5	BX-912	-0.0127747	0.74712	838
CASP5	Belinostat	-0.036336	0.352881	838
CASP5	Bexarotene	0.0153717	0.876039	838
CASP5	Bicalutamide	0.0221824	0.658199	838
CASP5	Bleomycin	0.0327077	0.585417	838
CASP5	Bleomycin (50 uM)	0.053245	0.151625	838
CASP5	Bortezomib	0.0722756	0.353325	838
CASP5	Bosutinib	0.0498672	0.342541	838
CASP5	Bryostatin 1	0.0452222	0.387534	838
CASP5	CAL-101	-0.00672606	0.879466	838
CASP5	CAY10603	-0.0182946	0.641705	838
CASP5	CCT007093	0.0306541	0.514464	838
CASP5	CCT018159	0.0284109	0.613532	838
CASP5	CEP-701	0.0865532	0.0291081	838
CASP5	CGP-082996	0.0769469	0.392305	838
CASP5	CGP-60474	0.0517452	0.567858	838
CASP5	CH5424802	-0.0298446	0.64794	838
CASP5	CHIR-99021	0.0627559	0.101544	838
CASP5	CI-1040	0.0326417	0.490007	838
CASP5	CMK	0.0517641	0.672	838
CASP5	CP466722	0.0205607	0.60127	838
CASP5	CP724714	-0.105079	0.016381	838
CASP5	CUDC-101	-0.0175725	0.668312	838
CASP5	CX-5461	-0.0383317	0.321853	838
CASP5	Camptothecin	0.0550542	0.211248	838
CASP5	Cetuximab	0.0126743	0.785778	838
CASP5	Cisplatin	0.0721701	0.121366	838
CASP5	Crizotinib	-0.00785722	0.97351	838
CASP5	Cyclopamine	0.0173561	0.903852	838
CASP5	Cytarabine	0.0389213	0.46025	838
CASP5	DMOG	0.0374807	0.432198	838
CASP5	Dabrafenib	0.0579935	0.175728	838
CASP5	Dasatinib	0.0419746	0.559544	838
CASP5	Docetaxel	0.0916933	0.0140991	838
CASP5	Doxorubicin	0.0260961	0.716815	838
CASP5	EHT 1864	-0.0336807	0.635613	838
CASP5	EKB-569	-0.109108	0.00402208	838
CASP5	EX-527	0.0296229	0.802861	838
CASP5	Elesclomol	0.0989233	0.0173657	838
CASP5	Embelin	0.0539232	0.33746	838
CASP5	Epothilone B	0.00644954	0.919572	838
CASP5	Erlotinib	0.0229385	0.778407	838
CASP5	Etoposide	0.0286663	0.588035	838
CASP5	FH535	0.0769042	0.0839349	838
CASP5	FK866	-0.0105306	0.797513	838
CASP5	FMK	0.00956808	0.914494	838
CASP5	FR-180204	-0.0585047	0.23562	838
CASP5	FTI-277	0.0118411	0.804581	838
CASP5	Foretinib	0.0287578	0.525719	838
CASP5	GDC0449	0.0490831	0.597385	838
CASP5	GDC0941	0.0426684	0.451211	838
CASP5	GNF-2	0.010218	0.980137	838
CASP5	GSK-650394	-0.00416521	0.967005	838
CASP5	GSK1070916	-0.00814288	0.848848	838
CASP5	GSK1904529A	0.0631185	0.157803	838
CASP5	GSK2126458	-0.0202646	0.625692	838
CASP5	GSK269962A	0.0413441	0.436091	838
CASP5	GSK429286A	0.00498293	0.92323	838
CASP5	GSK690693	-0.0117728	0.780224	838
CASP5	GW 441756	0.0508657	0.756835	838
CASP5	GW-2580	0.0117389	0.990935	838
CASP5	GW843682X	0.0521295	0.577156	838
CASP5	Gefitinib	-0.02828	0.520723	838
CASP5	Gemcitabine	0.0174405	0.761032	838
CASP5	Genentech Cpd 10	-0.0108937	0.798162	838
CASP5	HG-5-113-01	0.0496915	0.50262	838
CASP5	HG-5-88-01	0.0153797	0.939935	838
CASP5	HG-6-64-1	0.0177133	0.756717	838
CASP5	I-BET-762	-0.037479	0.308383	838
CASP5	IOX2	0.0360992	0.548286	838
CASP5	IPA-3	0.00591827	0.901541	838
CASP5	Imatinib	0.0149823	0.941769	838
CASP5	Ispinesib Mesylate	-0.02985	0.447309	838
CASP5	JNJ-26854165	0.0418234	0.421536	838
CASP5	JNK Inhibitor VIII	0.0676374	0.108136	838
CASP5	JNK-9L	0.0122706	0.86537	838
CASP5	JQ1	0.0403168	0.36018	838
CASP5	JQ12	0.0516977	0.333618	838
CASP5	JW-7-24-1	-0.00146741	0.972487	838
CASP5	JW-7-52-1	0.0578945	0.57161	838
CASP5	KIN001-055	-0.0163873	0.844276	838
CASP5	KIN001-102	-0.0526508	0.151227	838
CASP5	KIN001-135	0.0327479	0.783733	838
CASP5	KIN001-236	0.019207	0.640355	838
CASP5	KIN001-244	-0.0219291	0.58819	838
CASP5	KIN001-260	0.00742003	0.861104	838
CASP5	KIN001-266	-0.0162699	0.768831	838
CASP5	KIN001-270	0.030074	0.478138	838
CASP5	KU-55933	0.0615316	0.267669	838
CASP5	LAQ824	0.0518328	0.201478	838
CASP5	LFM-A13	0.0395063	0.453139	838
CASP5	LY317615	-0.0496785	0.259202	838
CASP5	Lapatinib	0.0543659	0.40846	838
CASP5	Lenalidomide	0.0282856	0.745027	838
CASP5	Linifanib	-0.000633203	0.993636	838
CASP5	Lisitinib	-0.00801551	0.930573	838
CASP5	MG-132	0.0448025	0.643804	838
CASP5	MK-2206	0.0408539	0.440797	838
CASP5	MLN4924	0.0910283	0.0784206	838
CASP5	MP470	-0.000776693	0.987611	838
CASP5	MPS-1-IN-1	-0.0337694	0.399514	838
CASP5	MS-275	0.104586	0.160845	838
CASP5	Masitinib	-0.00604968	0.894253	838
CASP5	Methotrexate	0.0110203	0.792567	838
CASP5	Midostaurin	0.040734	0.380395	838
CASP5	Mitomycin C	0.0303558	0.587871	838
CASP5	NG-25	0.00155819	0.971261	838
CASP5	NPK76-II-72-1	-0.0119757	0.76	838
CASP5	NSC-207895	0.0138837	0.798451	838
CASP5	NSC-87877	-0.00703307	0.924934	838
CASP5	NU-7441	0.0518317	0.449256	838
CASP5	Navitoclax	0.0516581	0.18014	838
CASP5	Nilotinib	0.0159963	0.793674	838
CASP5	Nutlin-3a (-)	-0.00308912	0.963115	838
CASP5	OSI-027	0.0245698	0.531099	838
CASP5	OSI-930	0.0066108	0.886869	838
CASP5	OSU-03012	0.0288637	0.594869	838
CASP5	Obatoclax Mesylate	0.0784433	0.0756738	838
CASP5	Olaparib	0.07192	0.0892298	838
CASP5	PAC-1	-0.00248447	0.964046	838
CASP5	PD-0325901	0.0401877	0.339998	838
CASP5	PD-0332991	0.0598373	0.254701	838
CASP5	PD-173074	0.0340955	0.827796	838
CASP5	PF-4708671	0.0108819	0.939211	838
CASP5	PF-562271	0.0268535	0.666882	838
CASP5	PFI-1	0.0573891	0.218868	838
CASP5	PHA-665752	-0.000329261	0.998715	838
CASP5	PHA-793887	-0.0381803	0.301553	838
CASP5	PI-103	0.0264845	0.498481	838
CASP5	PIK-93	0.00683673	0.867059	838
CASP5	PLX4720	0.059882	0.144985	838
CASP5	Paclitaxel	0.039872	0.74634	838
CASP5	Parthenolide	0.0363647	0.7536	838
CASP5	Pazopanib	0.021029	0.739609	838
CASP5	Phenformin	-0.0411163	0.289437	838
CASP5	Pyrimethamine	0.0410945	0.740457	838
CASP5	QL-VIII-58	0.108448	0.0978004	838
CASP5	QL-X-138	0.0271613	0.492996	838
CASP5	QL-XI-92	0.0141254	0.729234	838
CASP5	QL-XII-47	-0.0171353	0.705944	838
CASP5	QL-XII-61	0.016377	0.844279	838
CASP5	QS11	0.0130758	0.871229	838
CASP5	RDEA119	0.0193947	0.638199	838
CASP5	RO-3306	0.0467744	0.275587	838
CASP5	Rapamycin	0.00711911	0.970209	838
CASP5	Roscovitine	-0.036215	0.855962	838
CASP5	Ruxolitinib	-0.00145333	0.983008	838
CASP5	S-Trityl-L-cysteine	0.0403497	0.656633	838
CASP5	SB 216763	0.00270504	0.965014	838
CASP5	SB 505124	-0.0761787	0.227818	838
CASP5	SB52334	-0.0351801	0.485869	838
CASP5	SB590885	0.0157076	0.781859	838
CASP5	SGC0946	0.03377	0.550137	838
CASP5	SL 0101-1	0.0130989	0.890573	838
CASP5	SN-38	0.0454234	0.31291	838
CASP5	SNX-2112	-0.029469	0.452178	838
CASP5	STF-62247	-0.00995557	0.838825	838
CASP5	Salubrinal	0.0576704	0.507235	838
CASP5	Saracatinib	0.0289543	0.757832	838
CASP5	Shikonin	0.0639184	0.200552	838
CASP5	Sorafenib	0.00942681	0.94852	838
CASP5	Sunitinib	0.0148514	0.878354	838
CASP5	T0901317	0.00726099	0.885543	838
CASP5	TAE684	0.00308285	0.986149	838
CASP5	TAK-715	-0.0837567	0.0207788	838
CASP5	TG101348	-0.0106497	0.793442	838
CASP5	TGX221	-0.0157028	0.83487	838
CASP5	THZ-2-102-1	0.0119087	0.770649	838
CASP5	THZ-2-49	0.00113624	0.980535	838
CASP5	TL-1-85	-0.00125181	0.97673	838
CASP5	TL-2-105	-0.0216889	0.594506	838
CASP5	TPCA-1	-0.0226341	0.55685	838
CASP5	TW 37	0.102153	0.0114441	838
CASP5	Talazoparib	0.0584275	0.186955	838
CASP5	Tamoxifen	-0.0228023	0.868304	838
CASP5	Temozolomide	0.0436336	0.537219	838
CASP5	Temsirolimus	0.0863202	0.0507038	838
CASP5	Thapsigargin	0.0842862	0.108783	838
CASP5	Tipifarnib	0.0177725	0.82834	838
CASP5	Tivozanib	0.0085352	0.912159	838
CASP5	Trametinib	0.032937	0.407882	838
CASP5	Tubastatin A	0.000406337	0.992373	838
CASP5	UNC0638	0.0379356	0.304361	838
CASP5	UNC1215	0.0423456	0.411871	838
CASP5	VNLG/124	-0.0222203	0.633452	838
CASP5	VX-11e	-0.050043	0.289814	838
CASP5	VX-680	0.0231722	0.84337	838
CASP5	VX-702	0.0341882	0.888947	838
CASP5	Veliparib	0.0271417	0.713824	838
CASP5	Vinblastine	0.0836342	0.0459147	838
CASP5	Vinorelbine	0.0369486	0.519697	838
CASP5	Vorinostat	0.0573534	0.126745	838
CASP5	WH-4-023	0.0229365	0.804321	838
CASP5	WZ-1-84	0.0510844	0.530525	838
CASP5	WZ3105	-0.0198602	0.610552	838
CASP5	XAV939	0.0768569	0.0466577	838
CASP5	XL-184	0.00446369	0.941277	838
CASP5	XMD11-85h	0.00193621	0.994156	838
CASP5	XMD13-2	0.00390277	0.927924	838
CASP5	XMD14-99	-0.00634036	0.888638	838
CASP5	XMD15-27	-0.020993	0.696018	838
CASP5	XMD8-85	0.0381912	0.677023	838
CASP5	XMD8-92	0.0565348	0.602336	838
CASP5	Y-39983	-0.022651	0.583634	838
CASP5	YK 4-279	0.0345047	0.548055	838
CASP5	YM155	0.07993	0.0835489	838
CASP5	YM201636	-0.0121995	0.771129	838
CASP5	Z-LLNle-CHO	0.0439563	0.586885	838
CASP5	ZG-10	0.10018	0.102062	838
CASP5	ZM-447439	-0.00112489	0.984955	838
CASP5	ZSTK474	-0.0129588	0.753441	838
CASP5	Zibotentan	-0.00244466	0.995968	838
CASP5	piperlongumine	0.0797962	0.0524028	838
CASP5	rTRAIL	-0.0471206	0.516563	838
CASP5	selumetinib	0.0222872	0.588251	838
CASP6	(5Z)-7-Oxozeaenol	0.206726	7.43147e-09	839
CASP6	17-AAG	0.0156849	0.705318	839
CASP6	5-Fluorouracil	0.0246635	0.531875	839
CASP6	681640	0.0724801	0.199795	839
CASP6	A-443654	-0.0924011	0.517912	839
CASP6	A-770041	-0.0473941	0.585843	839
CASP6	AC220	0.000822374	0.990774	839
CASP6	AG-014699	0.0198524	0.678926	839
CASP6	AICAR	0.011482	0.801352	839
CASP6	AKT inhibitor VIII	-0.104254	0.0127117	839
CASP6	AMG-706	0.0307181	0.644518	839
CASP6	AP-24534	-0.0157774	0.742358	839
CASP6	AR-42	0.0107295	0.789421	839
CASP6	AS601245	-0.0140183	0.835423	839
CASP6	AS605240	0.022793	0.637803	839
CASP6	AT-7519	-0.064164	0.0776923	839
CASP6	ATRA	0.0417538	0.407789	839
CASP6	AUY922	0.0498378	0.333044	839
CASP6	AZ628	0.108439	0.118023	839
CASP6	AZD6482	-0.00751319	0.904352	839
CASP6	AZD7762	0.0340668	0.429401	839
CASP6	AZD8055	0.000229426	0.996097	839
CASP6	Afatinib	-0.114893	0.00134392	839
CASP6	Axitinib	-0.0164041	0.803692	839
CASP6	BAY 61-3606	0.0410732	0.336929	839
CASP6	BEZ235	-0.0046292	0.941991	839
CASP6	BHG712	0.0247971	0.526477	839
CASP6	BI-2536	-0.145221	0.0954276	839
CASP6	BIRB 0796	0.0569278	0.257809	839
CASP6	BIX02189	-0.0402021	0.294235	839
CASP6	BMS-509744	-0.0869776	0.320373	839
CASP6	BMS-536924	-0.0298585	0.696348	839
CASP6	BMS-708163	-0.0450777	0.27395	839
CASP6	BMS-754807	0.0011445	0.986657	839
CASP6	BMS345541	-0.0849442	0.0181853	839
CASP6	BX-795	0.0243128	0.640129	839
CASP6	BX-912	-0.0391913	0.292325	839
CASP6	Belinostat	0.0217804	0.591692	839
CASP6	Bexarotene	-0.0162105	0.869021	839
CASP6	Bicalutamide	-0.000657823	0.991228	839
CASP6	Bleomycin	-0.0245872	0.695396	839
CASP6	Bleomycin (50 uM)	0.0402573	0.287505	839
CASP6	Bortezomib	-0.0894752	0.228467	839
CASP6	Bosutinib	-0.0283997	0.632643	839
CASP6	Bryostatin 1	0.0361218	0.508371	839
CASP6	CAL-101	-0.0480273	0.217655	839
CASP6	CAY10603	0.0363079	0.336536	839
CASP6	CCT007093	-0.0251149	0.601758	839
CASP6	CCT018159	0.0262028	0.644406	839
CASP6	CEP-701	0.0519374	0.211448	839
CASP6	CGP-082996	-0.0627461	0.511629	839
CASP6	CGP-60474	-0.0796141	0.330076	839
CASP6	CH5424802	-0.0482569	0.394981	839
CASP6	CHIR-99021	0.00430919	0.926207	839
CASP6	CI-1040	0.0777616	0.0637171	839
CASP6	CMK	0.0975128	0.337014	839
CASP6	CP466722	-0.0957439	0.00728121	839
CASP6	CP724714	-0.104858	0.0165927	839
CASP6	CUDC-101	0.0174819	0.670092	839
CASP6	CX-5461	0.0497017	0.189919	839
CASP6	Camptothecin	0.0423331	0.355696	839
CASP6	Cetuximab	-0.0865746	0.0287355	839
CASP6	Cisplatin	0.0713197	0.126579	839
CASP6	Crizotinib	-0.0604674	0.669329	839
CASP6	Cyclopamine	-0.0298895	0.814551	839
CASP6	Cytarabine	-0.0216355	0.709468	839
CASP6	DMOG	-0.0155243	0.776136	839
CASP6	Dabrafenib	0.134833	0.000476815	839
CASP6	Dasatinib	-0.0730567	0.281675	839
CASP6	Docetaxel	0.0943812	0.011425	839
CASP6	Doxorubicin	-0.0110685	0.895444	839
CASP6	EHT 1864	-0.0937243	0.0812516	839
CASP6	EKB-569	-0.160641	1.27e-05	839
CASP6	EX-527	0.0410014	0.698751	839
CASP6	Elesclomol	0.0583965	0.185322	839
CASP6	Embelin	0.069314	0.187666	839
CASP6	Epothilone B	0.00998724	0.876315	839
CASP6	Erlotinib	-0.04524	0.557657	839
CASP6	Etoposide	-0.0327163	0.526033	839
CASP6	FH535	0.0410146	0.408933	839
CASP6	FK866	0.0624549	0.0917079	839
CASP6	FMK	-0.0702088	0.242324	839
CASP6	FR-180204	-0.044389	0.397374	839
CASP6	FTI-277	0.0149371	0.751671	839
CASP6	Foretinib	0.0370482	0.398106	839
CASP6	GDC0449	0.0581337	0.505192	839
CASP6	GDC0941	-0.0372921	0.524543	839
CASP6	GNF-2	-0.0631816	0.779683	839
CASP6	GSK-650394	0.0265087	0.753016	839
CASP6	GSK1070916	-0.0744732	0.0443854	839
CASP6	GSK1904529A	0.00403932	0.943932	839
CASP6	GSK2126458	-0.0604428	0.112113	839
CASP6	GSK269962A	0.0161548	0.800663	839
CASP6	GSK429286A	-0.0176302	0.713009	839
CASP6	GSK690693	-0.0751876	0.0421344	839
CASP6	GW 441756	-0.00332896	0.994189	839
CASP6	GW-2580	-0.00764988	0.994893	839
CASP6	GW843682X	-0.121345	0.113409	839
CASP6	Gefitinib	-0.0638593	0.122281	839
CASP6	Gemcitabine	-0.00794909	0.898695	839
CASP6	Genentech Cpd 10	-0.0667091	0.0735549	839
CASP6	HG-5-113-01	0.0514978	0.484915	839
CASP6	HG-5-88-01	-4.058e-05	0.999506	839
CASP6	HG-6-64-1	-0.00608533	0.923408	839
CASP6	I-BET-762	0.00311186	0.938973	839
CASP6	IOX2	-0.0287607	0.645963	839
CASP6	IPA-3	0.0973018	0.0112015	839
CASP6	Imatinib	-0.0184312	0.923206	839
CASP6	Ispinesib Mesylate	-0.0613791	0.0999585	839
CASP6	JNJ-26854165	0.0194336	0.744919	839
CASP6	JNK Inhibitor VIII	0.0474114	0.275893	839
CASP6	JNK-9L	0.020864	0.756311	839
CASP6	JQ1	0.0197118	0.683431	839
CASP6	JQ12	0.00109277	0.989253	839
CASP6	JW-7-24-1	-0.0121613	0.763861	839
CASP6	JW-7-52-1	-0.130619	0.10212	839
CASP6	KIN001-055	-0.0980736	0.0443025	839
CASP6	KIN001-102	-0.141604	4.722e-05	839
CASP6	KIN001-135	0.0593901	0.571631	839
CASP6	KIN001-236	-0.022227	0.584455	839
CASP6	KIN001-244	0.016105	0.696359	839
CASP6	KIN001-260	0.00107329	0.980032	839
CASP6	KIN001-266	-0.00780234	0.893687	839
CASP6	KIN001-270	0.0269261	0.530996	839
CASP6	KU-55933	0.0196512	0.791788	839
CASP6	LAQ824	-0.00820006	0.860597	839
CASP6	LFM-A13	-0.0750982	0.112957	839
CASP6	LY317615	-0.136877	0.000445385	839
CASP6	Lapatinib	-0.149407	0.0130442	839
CASP6	Lenalidomide	0.00325491	0.976795	839
CASP6	Linifanib	0.00244505	0.972898	839
CASP6	Lisitinib	0.0084611	0.925399	839
CASP6	MG-132	-0.0436961	0.653093	839
CASP6	MK-2206	-0.0818708	0.0868924	839
CASP6	MLN4924	0.0134213	0.844379	839
CASP6	MP470	-0.00886206	0.864783	839
CASP6	MPS-1-IN-1	0.0431312	0.271792	839
CASP6	MS-275	-0.0561154	0.513304	839
CASP6	Masitinib	-0.00834747	0.851182	839
CASP6	Methotrexate	-0.00575444	0.89213	839
CASP6	Midostaurin	-0.0375687	0.422401	839
CASP6	Mitomycin C	-0.0359383	0.50759	839
CASP6	NG-25	0.016067	0.688033	839
CASP6	NPK76-II-72-1	-0.0640264	0.0745173	839
CASP6	NSC-207895	0.018205	0.729801	839
CASP6	NSC-87877	0.0445057	0.429137	839
CASP6	NU-7441	0.0489154	0.48307	839
CASP6	Navitoclax	0.00489006	0.911711	839
CASP6	Nilotinib	-0.0353048	0.518358	839
CASP6	Nutlin-3a (-)	0.0299671	0.567316	839
CASP6	OSI-027	-0.0227253	0.564511	839
CASP6	OSI-930	-0.0205055	0.636484	839
CASP6	OSU-03012	0.043114	0.393855	839
CASP6	Obatoclax Mesylate	0.113364	0.0064813	839
CASP6	Olaparib	0.000707633	0.989765	839
CASP6	PAC-1	-0.116833	0.0029339	839
CASP6	PD-0325901	0.0809368	0.0407162	839
CASP6	PD-0332991	0.0632321	0.222298	839
CASP6	PD-173074	-0.0517855	0.702811	839
CASP6	PF-4708671	-0.0489695	0.594117	839
CASP6	PF-562271	-0.00389229	0.957805	839
CASP6	PFI-1	0.0375814	0.453608	839
CASP6	PHA-665752	-0.0105691	0.955995	839
CASP6	PHA-793887	-0.0251103	0.50664	839
CASP6	PI-103	0.0321848	0.403652	839
CASP6	PIK-93	-0.0290859	0.442018	839
CASP6	PLX4720	0.17674	8.4251e-07	839
CASP6	Paclitaxel	-0.10942	0.226642	839
CASP6	Parthenolide	0.0295241	0.808348	839
CASP6	Pazopanib	0.00897274	0.897339	839
CASP6	Phenformin	-0.0257596	0.521962	839
CASP6	Pyrimethamine	-0.0608491	0.602537	839
CASP6	QL-VIII-58	0.0130262	0.900546	839
CASP6	QL-X-138	-0.000936306	0.982427	839
CASP6	QL-XI-92	0.00846272	0.840334	839
CASP6	QL-XII-47	0.0102492	0.827563	839
CASP6	QL-XII-61	-0.0160985	0.846982	839
CASP6	QS11	0.0477375	0.437515	839
CASP6	RDEA119	0.0958378	0.00781119	839
CASP6	RO-3306	0.0711313	0.0876987	839
CASP6	Rapamycin	-0.131883	0.161824	839
CASP6	Roscovitine	-0.079918	0.604267	839
CASP6	Ruxolitinib	-0.0643917	0.173709	839
CASP6	S-Trityl-L-cysteine	-0.105	0.160209	839
CASP6	SB 216763	0.0108572	0.85181	839
CASP6	SB 505124	0.0344693	0.662911	839
CASP6	SB52334	0.0687104	0.117251	839
CASP6	SB590885	0.129904	0.00207431	839
CASP6	SGC0946	-0.0637714	0.19341	839
CASP6	SL 0101-1	0.0385807	0.622944	839
CASP6	SN-38	0.0125587	0.817086	839
CASP6	SNX-2112	0.0161755	0.691939	839
CASP6	STF-62247	-0.0824524	0.0356873	839
CASP6	Salubrinal	-0.0409393	0.657199	839
CASP6	Saracatinib	-0.0793418	0.331659	839
CASP6	Shikonin	0.09276	0.046687	839
CASP6	Sorafenib	0.0168636	0.903206	839
CASP6	Sunitinib	-0.06441	0.397937	839
CASP6	T0901317	0.0194524	0.672697	839
CASP6	TAE684	-0.0532523	0.644027	839
CASP6	TAK-715	-0.131042	0.000211664	839
CASP6	TG101348	-0.0464395	0.213255	839
CASP6	TGX221	-0.0355724	0.613923	839
CASP6	THZ-2-102-1	0.0298387	0.440879	839
CASP6	THZ-2-49	-0.0668079	0.0726487	839
CASP6	TL-1-85	0.0197625	0.622211	839
CASP6	TL-2-105	-0.0309537	0.436168	839
CASP6	TPCA-1	-0.0285552	0.453108	839
CASP6	TW 37	0.143867	0.000188812	839
CASP6	Talazoparib	-0.0268839	0.586197	839
CASP6	Tamoxifen	-0.0445712	0.688782	839
CASP6	Temozolomide	-0.0200664	0.81356	839
CASP6	Temsirolimus	-0.00473644	0.941584	839
CASP6	Thapsigargin	0.0944177	0.0662905	839
CASP6	Tipifarnib	-0.0100621	0.910473	839
CASP6	Tivozanib	-0.0131933	0.859307	839
CASP6	Trametinib	0.0986843	0.00710295	839
CASP6	Tubastatin A	0.00686871	0.866429	839
CASP6	UNC0638	0.0234053	0.539328	839
CASP6	UNC1215	-0.0881658	0.0528133	839
CASP6	VNLG/124	-0.000766458	0.988236	839
CASP6	VX-11e	0.0449749	0.350982	839
CASP6	VX-680	-0.0814885	0.361861	839
CASP6	VX-702	2.6503e-05	0.999861	839
CASP6	Veliparib	-0.00463987	0.961575	839
CASP6	Vinblastine	0.0526682	0.235628	839
CASP6	Vinorelbine	-0.038114	0.504305	839
CASP6	Vorinostat	0.0333259	0.389335	839
CASP6	WH-4-023	-0.0692886	0.372971	839
CASP6	WZ-1-84	-0.0815971	0.284465	839
CASP6	WZ3105	-0.0627893	0.0841446	839
CASP6	XAV939	-0.079028	0.0402967	839
CASP6	XL-184	-0.00621349	0.918005	839
CASP6	XMD11-85h	0.0100093	0.967546	839
CASP6	XMD13-2	-0.0205129	0.604852	839
CASP6	XMD14-99	-0.0377341	0.34685	839
CASP6	XMD15-27	-0.0427053	0.377118	839
CASP6	XMD8-85	-0.0684628	0.4053	839
CASP6	XMD8-92	0.0649823	0.531929	839
CASP6	Y-39983	-0.0192554	0.646228	839
CASP6	YK 4-279	0.0720778	0.145633	839
CASP6	YM155	0.0855203	0.0603814	839
CASP6	YM201636	-0.0416338	0.27834	839
CASP6	Z-LLNle-CHO	-0.104138	0.131198	839
CASP6	ZG-10	0.0746961	0.247399	839
CASP6	ZM-447439	-0.0333979	0.504645	839
CASP6	ZSTK474	-0.0789258	0.0301433	839
CASP6	Zibotentan	-0.0597603	0.728729	839
CASP6	piperlongumine	0.0847856	0.0375749	839
CASP6	rTRAIL	-0.0887743	0.14248	839
CASP6	selumetinib	0.0931826	0.0102513	839
CASP8	(5Z)-7-Oxozeaenol	-0.0749688	0.0591865	841
CASP8	17-AAG	-0.061023	0.1083	841
CASP8	5-Fluorouracil	-0.120867	0.000722113	841
CASP8	681640	0.0275481	0.672534	841
CASP8	A-443654	-0.0765327	0.619014	841
CASP8	A-770041	-0.0920282	0.221363	841
CASP8	AC220	-0.00765991	0.905959	841
CASP8	AG-014699	0.130789	0.00100752	841
CASP8	AICAR	-0.111538	0.00370059	841
CASP8	AKT inhibitor VIII	-0.0164301	0.754854	841
CASP8	AMG-706	0.0488648	0.406927	841
CASP8	AP-24534	-0.111871	0.00388178	841
CASP8	AR-42	-0.0631852	0.0835692	841
CASP8	AS601245	-0.0901685	0.0548819	841
CASP8	AS605240	-0.147962	0.000104128	841
CASP8	AT-7519	-0.145261	3.1651e-05	841
CASP8	ATRA	-0.0335251	0.52335	841
CASP8	AUY922	-0.0912891	0.0451413	841
CASP8	AZ628	-0.115519	0.0918563	841
CASP8	AZD6482	-0.069651	0.104035	841
CASP8	AZD7762	-0.172051	4.32957e-06	841
CASP8	AZD8055	-0.20058	6.16616e-08	841
CASP8	Afatinib	-0.00795884	0.852545	841
CASP8	Axitinib	0.0357276	0.521468	841
CASP8	BAY 61-3606	-0.0925682	0.0191533	841
CASP8	BEZ235	-0.120731	0.00412116	841
CASP8	BHG712	-0.183478	1.21085e-07	841
CASP8	BI-2536	-0.124217	0.160853	841
CASP8	BIRB 0796	0.0183952	0.753389	841
CASP8	BIX02189	-0.169834	1.22322e-06	841
CASP8	BMS-509744	-0.0677849	0.458469	841
CASP8	BMS-536924	-0.0388978	0.577756	841
CASP8	BMS-708163	0.0047358	0.92373	841
CASP8	BMS-754807	0.0394899	0.482483	841
CASP8	BMS345541	-0.117301	0.000904981	841
CASP8	BX-795	-0.0493411	0.284633	841
CASP8	BX-912	-0.0513406	0.161013	841
CASP8	Belinostat	-0.0620764	0.100149	841
CASP8	Bexarotene	-0.0515661	0.44803	841
CASP8	Bicalutamide	0.0112082	0.83486	841
CASP8	Bleomycin	-0.100269	0.0327199	841
CASP8	Bleomycin (50 uM)	-0.0162258	0.684563	841
CASP8	Bortezomib	-0.185345	0.00374705	841
CASP8	Bosutinib	-0.107781	0.0147494	841
CASP8	Bryostatin 1	-0.0106978	0.871777	841
CASP8	CAL-101	-0.161845	5.40578e-06	841
CASP8	CAY10603	-0.0591945	0.105887	841
CASP8	CCT007093	0.0469103	0.290463	841
CASP8	CCT018159	-0.0569692	0.2482	841
CASP8	CEP-701	-0.136175	0.000358681	841
CASP8	CGP-082996	-0.120596	0.124631	841
CASP8	CGP-60474	-0.191477	0.00425395	841
CASP8	CH5424802	-0.0884296	0.0668234	841
CASP8	CHIR-99021	-0.0843052	0.02417	841
CASP8	CI-1040	-0.146481	0.000176579	841
CASP8	CMK	-0.0557006	0.64101	841
CASP8	CP466722	-0.123954	0.000427575	841
CASP8	CP724714	0.00414713	0.955693	841
CASP8	CUDC-101	-0.0466836	0.22044	841
CASP8	CX-5461	0.0129618	0.755394	841
CASP8	Camptothecin	-0.00657218	0.909011	841
CASP8	Cetuximab	-0.0288925	0.510248	841
CASP8	Cisplatin	0.0262905	0.629222	841
CASP8	Crizotinib	-0.164193	0.0468305	841
CASP8	Cyclopamine	-0.0391003	0.749814	841
CASP8	Cytarabine	-0.106951	0.0148555	841
CASP8	DMOG	-0.196474	2.1141e-07	841
CASP8	Dabrafenib	-0.109473	0.00558125	841
CASP8	Dasatinib	-0.104014	0.10767	841
CASP8	Docetaxel	0.0619642	0.10389	841
CASP8	Doxorubicin	-0.0269025	0.705747	841
CASP8	EHT 1864	0.0401965	0.548137	841
CASP8	EKB-569	-0.170872	3.05409e-06	841
CASP8	EX-527	0.0286691	0.810697	841
CASP8	Elesclomol	0.032838	0.490606	841
CASP8	Embelin	-0.0343677	0.584583	841
CASP8	Epothilone B	-0.0521163	0.301427	841
CASP8	Erlotinib	0.106646	0.131828	841
CASP8	Etoposide	-0.0271407	0.611624	841
CASP8	FH535	-0.037046	0.462617	841
CASP8	FK866	-0.00438962	0.917589	841
CASP8	FMK	-0.172039	0.000159313	841
CASP8	FR-180204	-0.0997261	0.025387	841
CASP8	FTI-277	0.013713	0.773148	841
CASP8	Foretinib	-0.0027173	0.958134	841
CASP8	GDC0449	-0.0198778	0.869579	841
CASP8	GDC0941	-0.100304	0.0279119	841
CASP8	GNF-2	-0.0347511	0.897513	841
CASP8	GSK-650394	-0.00907491	0.930455	841
CASP8	GSK1070916	0.0127613	0.759551	841
CASP8	GSK1904529A	0.0456383	0.326191	841
CASP8	GSK2126458	-0.0757007	0.0428699	841
CASP8	GSK269962A	0.0160263	0.802311	841
CASP8	GSK429286A	-0.0240413	0.602062	841
CASP8	GSK690693	-0.0396438	0.30748	841
CASP8	GW 441756	-0.0139571	0.968098	841
CASP8	GW-2580	0.0171897	0.977243	841
CASP8	GW843682X	-0.135682	0.0706461	841
CASP8	Gefitinib	-0.0132769	0.774617	841
CASP8	Gemcitabine	-0.104083	0.0171501	841
CASP8	Genentech Cpd 10	-0.066998	0.0722725	841
CASP8	HG-5-113-01	-0.0138791	0.88005	841
CASP8	HG-5-88-01	-0.00277892	0.99251	841
CASP8	HG-6-64-1	-0.104586	0.0123411	841
CASP8	I-BET-762	-0.151766	1.0121e-05	841
CASP8	IOX2	0.00116298	0.990735	841
CASP8	IPA-3	-0.104691	0.00603756	841
CASP8	Imatinib	-0.0616288	0.685563	841
CASP8	Ispinesib Mesylate	-0.0619663	0.0965158	841
CASP8	JNJ-26854165	-0.0325185	0.554311	841
CASP8	JNK Inhibitor VIII	0.0268281	0.561192	841
CASP8	JNK-9L	-0.110158	0.0175322	841
CASP8	JQ1	-0.0409981	0.351028	841
CASP8	JQ12	-0.0597114	0.250339	841
CASP8	JW-7-24-1	-0.0828177	0.0210085	841
CASP8	JW-7-52-1	-0.204983	0.00358728	841
CASP8	KIN001-055	-0.062523	0.263365	841
CASP8	KIN001-102	-0.155196	7.62881e-06	841
CASP8	KIN001-135	0.184903	0.0258566	841
CASP8	KIN001-236	-0.163474	3.6452e-06	841
CASP8	KIN001-244	-0.122252	0.00063833	841
CASP8	KIN001-260	-0.173809	6.30271e-07	841
CASP8	KIN001-266	-0.0763391	0.0878931	841
CASP8	KIN001-270	-0.0448246	0.269905	841
CASP8	KU-55933	-0.108463	0.0254912	841
CASP8	LAQ824	-0.0886748	0.0219011	841
CASP8	LFM-A13	-0.0119768	0.847516	841
CASP8	LY317615	-0.208746	2.03459e-08	841
CASP8	Lapatinib	0.0740075	0.248738	841
CASP8	Lenalidomide	-0.101466	0.0647701	841
CASP8	Linifanib	-0.0228837	0.704421	841
CASP8	Lisitinib	0.0142028	0.865062	841
CASP8	MG-132	-0.114655	0.132044	841
CASP8	MK-2206	-0.126748	0.00470666	841
CASP8	MLN4924	-0.0477789	0.4029	841
CASP8	MP470	0.0705355	0.0954024	841
CASP8	MPS-1-IN-1	-0.0456403	0.242623	841
CASP8	MS-275	-0.13235	0.0648936	841
CASP8	Masitinib	-0.0932072	0.0115034	841
CASP8	Methotrexate	-0.180074	4.93642e-07	841
CASP8	Midostaurin	-0.0667166	0.124219	841
CASP8	Mitomycin C	-0.0504978	0.320308	841
CASP8	NG-25	-0.139625	6.7363e-05	841
CASP8	NPK76-II-72-1	-0.0790359	0.0259627	841
CASP8	NSC-207895	0.0784142	0.0613869	841
CASP8	NSC-87877	0.0419913	0.460013	841
CASP8	NU-7441	-0.0913442	0.113058	841
CASP8	Navitoclax	0.0546572	0.154509	841
CASP8	Nilotinib	-0.0779095	0.0948775	841
CASP8	Nutlin-3a (-)	-0.11573	0.00586816	841
CASP8	OSI-027	-0.0236004	0.548483	841
CASP8	OSI-930	-0.0758132	0.0479468	841
CASP8	OSU-03012	-0.0813568	0.0723044	841
CASP8	Obatoclax Mesylate	-0.111642	0.00751344	841
CASP8	Olaparib	0.0854669	0.0396573	841
CASP8	PAC-1	-0.151986	7.4259e-05	841
CASP8	PD-0325901	-0.0946134	0.0154943	841
CASP8	PD-0332991	-0.103129	0.0263104	841
CASP8	PD-173074	-0.0338682	0.829174	841
CASP8	PF-4708671	0.00503596	0.97721	841
CASP8	PF-562271	-0.00999606	0.888389	841
CASP8	PFI-1	-0.116982	0.00541935	841
CASP8	PHA-665752	-0.0220867	0.897029	841
CASP8	PHA-793887	-0.147637	1.9302e-05	841
CASP8	PI-103	-0.0173009	0.666285	841
CASP8	PIK-93	-0.138141	6.9973e-05	841
CASP8	PLX4720	-0.0271059	0.543844	841
CASP8	Paclitaxel	-0.138213	0.098364	841
CASP8	Parthenolide	-0.072186	0.466622	841
CASP8	Pazopanib	0.0424835	0.447914	841
CASP8	Phenformin	-0.0950836	0.00951099	841
CASP8	Pyrimethamine	-0.101424	0.33268	841
CASP8	QL-VIII-58	-0.0580082	0.450999	841
CASP8	QL-X-138	-0.0251764	0.527495	841
CASP8	QL-XI-92	-0.0951229	0.00804065	841
CASP8	QL-XII-47	-0.0566972	0.158543	841
CASP8	QL-XII-61	-0.0732928	0.258068	841
CASP8	QS11	-0.0453298	0.467799	841
CASP8	RDEA119	-0.128108	0.000279101	841
CASP8	RO-3306	0.0386848	0.375061	841
CASP8	Rapamycin	-0.166593	0.0549147	841
CASP8	Roscovitine	-0.107524	0.431722	841
CASP8	Ruxolitinib	-0.107686	0.0114988	841
CASP8	S-Trityl-L-cysteine	-0.165501	0.0184387	841
CASP8	SB 216763	0.0559985	0.257608	841
CASP8	SB 505124	0.0816439	0.19105	841
CASP8	SB52334	0.168001	1.0821e-05	841
CASP8	SB590885	-0.0417207	0.414488	841
CASP8	SGC0946	0.00661926	0.927577	841
CASP8	SL 0101-1	0.0264297	0.754221	841
CASP8	SN-38	-0.0242326	0.624235	841
CASP8	SNX-2112	-0.132305	0.000190452	841
CASP8	STF-62247	-0.148968	7.5962e-05	841
CASP8	Salubrinal	-0.101402	0.200184	841
CASP8	Saracatinib	-0.00583565	0.958453	841
CASP8	Shikonin	-0.0429262	0.427945	841
CASP8	Sorafenib	-0.0376781	0.763898	841
CASP8	Sunitinib	-0.158247	0.0135511	841
CASP8	T0901317	-0.0642872	0.111911	841
CASP8	TAE684	-0.110334	0.219806	841
CASP8	TAK-715	-0.159013	5.73553e-06	841
CASP8	TG101348	-0.144753	3.3343e-05	841
CASP8	TGX221	-0.0387472	0.579479	841
CASP8	THZ-2-102-1	-0.0696636	0.0570964	841
CASP8	THZ-2-49	-0.224426	1.21557e-10	841
CASP8	TL-1-85	-0.139588	7.1425e-05	841
CASP8	TL-2-105	-0.056592	0.135946	841
CASP8	TPCA-1	-0.141095	4.8147e-05	841
CASP8	TW 37	0.0642348	0.143126	841
CASP8	Talazoparib	0.0345939	0.467776	841
CASP8	Tamoxifen	-0.0382377	0.745577	841
CASP8	Temozolomide	-0.0832319	0.127772	841
CASP8	Temsirolimus	-0.154557	0.000128416	841
CASP8	Thapsigargin	-0.0340954	0.620455	841
CASP8	Tipifarnib	-0.0772265	0.163671	841
CASP8	Tivozanib	-0.0106713	0.890152	841
CASP8	Trametinib	-0.127636	0.00039168	841
CASP8	Tubastatin A	-0.0744546	0.0388279	841
CASP8	UNC0638	-0.0683706	0.0552936	841
CASP8	UNC1215	0.0294122	0.596843	841
CASP8	VNLG/124	-0.0793898	0.0455121	841
CASP8	VX-11e	-0.144382	0.000337481	841
CASP8	VX-680	-0.0713422	0.437068	841
CASP8	VX-702	-0.0254202	0.919003	841
CASP8	Veliparib	0.00875368	0.922802	841
CASP8	Vinblastine	-0.103806	0.0110292	841
CASP8	Vinorelbine	-0.0360933	0.531737	841
CASP8	Vorinostat	-0.0431377	0.258289	841
CASP8	WH-4-023	-0.0612816	0.440522	841
CASP8	WZ-1-84	-0.00234382	0.981731	841
CASP8	WZ3105	-0.0742044	0.0393235	841
CASP8	XAV939	-0.0262133	0.532405	841
CASP8	XL-184	-0.0490842	0.293417	841
CASP8	XMD11-85h	-0.0941258	0.475926	841
CASP8	XMD13-2	-0.0409451	0.277516	841
CASP8	XMD14-99	-0.135002	0.000196737	841
CASP8	XMD15-27	-0.129837	0.00135475	841
CASP8	XMD8-85	-0.155577	0.023531	841
CASP8	XMD8-92	-0.120313	0.149677	841
CASP8	Y-39983	-0.0954853	0.0093053	841
CASP8	YK 4-279	-0.0576938	0.263115	841
CASP8	YM155	-0.0288604	0.615776	841
CASP8	YM201636	-0.0976868	0.00696086	841
CASP8	Z-LLNle-CHO	-0.289761	6.99346e-07	841
CASP8	ZG-10	0.0191907	0.816499	841
CASP8	ZM-447439	-0.00120857	0.983882	841
CASP8	ZSTK474	-0.151004	1.7596e-05	841
CASP8	Zibotentan	-0.018268	0.956536	841
CASP8	piperlongumine	-0.0394346	0.384368	841
CASP8	rTRAIL	-0.192628	3.1689e-05	841
CASP8	selumetinib	-0.119035	0.000827178	841
CASP9	(5Z)-7-Oxozeaenol	0.0205761	0.664543	842
CASP9	17-AAG	0.0236791	0.556773	842
CASP9	5-Fluorouracil	-0.0680547	0.0649526	842
CASP9	681640	0.0233271	0.725202	842
CASP9	A-443654	-0.000354143	0.999545	842
CASP9	A-770041	-0.0882766	0.246238	842
CASP9	AC220	-0.0392438	0.427991	842
CASP9	AG-014699	0.0803281	0.051284	842
CASP9	AICAR	-0.00118803	0.979833	842
CASP9	AKT inhibitor VIII	0.00319804	0.95559	842
CASP9	AMG-706	0.0376806	0.551789	842
CASP9	AP-24534	-0.0689392	0.0905503	842
CASP9	AR-42	-0.0524148	0.155529	842
CASP9	AS601245	-0.0295048	0.619234	842
CASP9	AS605240	0.0138911	0.785039	842
CASP9	AT-7519	-0.0875482	0.014319	842
CASP9	ATRA	-0.0448887	0.366989	842
CASP9	AUY922	-0.036742	0.507462	842
CASP9	AZ628	0.0644486	0.398759	842
CASP9	AZD6482	0.00333789	0.957934	842
CASP9	AZD7762	-0.0821763	0.0382949	842
CASP9	AZD8055	-0.074703	0.057961	842
CASP9	Afatinib	0.053463	0.157984	842
CASP9	Axitinib	-0.0183683	0.776037	842
CASP9	BAY 61-3606	-0.00987292	0.837844	842
CASP9	BEZ235	-0.0217622	0.695255	842
CASP9	BHG712	-0.0807815	0.0260491	842
CASP9	BI-2536	0.0266265	0.834669	842
CASP9	BIRB 0796	0.0410346	0.437585	842
CASP9	BIX02189	-0.046922	0.215951	842
CASP9	BMS-509744	0.0394333	0.691615	842
CASP9	BMS-536924	-0.0210467	0.799754	842
CASP9	BMS-708163	0.041866	0.312452	842
CASP9	BMS-754807	-0.0154659	0.814255	842
CASP9	BMS345541	-0.0533823	0.148643	842
CASP9	BX-795	-0.0158904	0.774419	842
CASP9	BX-912	-0.0227851	0.55262	842
CASP9	Belinostat	-0.0482263	0.2095	842
CASP9	Bexarotene	-0.0383595	0.618205	842
CASP9	Bicalutamide	0.0448353	0.322672	842
CASP9	Bleomycin	-0.0241829	0.700592	842
CASP9	Bleomycin (50 uM)	0.0593328	0.107736	842
CASP9	Bortezomib	-0.010693	0.920243	842
CASP9	Bosutinib	-0.00697336	0.920559	842
CASP9	Bryostatin 1	-0.0210689	0.72625	842
CASP9	CAL-101	-0.0436934	0.26661	842
CASP9	CAY10603	-0.0294535	0.441063	842
CASP9	CCT007093	0.0344596	0.456305	842
CASP9	CCT018159	-0.00101211	0.987996	842
CASP9	CEP-701	-0.0553958	0.180165	842
CASP9	CGP-082996	-0.160131	0.0275486	842
CASP9	CGP-60474	-0.0376081	0.696378	842
CASP9	CH5424802	-0.0322529	0.612924	842
CASP9	CHIR-99021	0.126349	0.000476576	842
CASP9	CI-1040	0.00559337	0.920077	842
CASP9	CMK	-0.00084799	0.995957	842
CASP9	CP466722	-0.00428851	0.918587	842
CASP9	CP724714	0.0411819	0.454188	842
CASP9	CUDC-101	-0.0508797	0.179373	842
CASP9	CX-5461	-0.00693933	0.871537	842
CASP9	Camptothecin	-0.0275936	0.572714	842
CASP9	Cetuximab	0.0430875	0.306247	842
CASP9	Cisplatin	0.0294668	0.581769	842
CASP9	Crizotinib	-0.0188747	0.92265	842
CASP9	Cyclopamine	-0.134333	0.113775	842
CASP9	Cytarabine	-0.0130736	0.831193	842
CASP9	DMOG	-0.104207	0.0106675	842
CASP9	Dabrafenib	0.0440509	0.321827	842
CASP9	Dasatinib	-0.0538103	0.441072	842
CASP9	Docetaxel	0.014896	0.715333	842
CASP9	Doxorubicin	-0.0417781	0.52005	842
CASP9	EHT 1864	-0.0568694	0.349798	842
CASP9	EKB-569	-0.00428092	0.930391	842
CASP9	EX-527	0.00305053	0.983064	842
CASP9	Elesclomol	-0.00071572	0.988998	842
CASP9	Embelin	-0.0221933	0.752786	842
CASP9	Epothilone B	-0.0569534	0.253448	842
CASP9	Erlotinib	0.0134279	0.87632	842
CASP9	Etoposide	-0.0621831	0.17208	842
CASP9	FH535	-0.110541	0.0086968	842
CASP9	FK866	-0.0580099	0.119081	842
CASP9	FMK	0.0291274	0.695659	842
CASP9	FR-180204	0.0122166	0.855153	842
CASP9	FTI-277	0.0380039	0.381173	842
CASP9	Foretinib	-0.0325971	0.465199	842
CASP9	GDC0449	-0.0183224	0.884071	842
CASP9	GDC0941	0.0142266	0.839785	842
CASP9	GNF-2	-0.0360464	0.892923	842
CASP9	GSK-650394	-0.0378504	0.614647	842
CASP9	GSK1070916	0.039619	0.306147	842
CASP9	GSK1904529A	0.0805046	0.0647937	842
CASP9	GSK2126458	0.0070134	0.874278	842
CASP9	GSK269962A	0.0654588	0.162991	842
CASP9	GSK429286A	0.0386985	0.374406	842
CASP9	GSK690693	-0.0291904	0.462089	842
CASP9	GW 441756	0.0601112	0.687757	842
CASP9	GW-2580	0.0487392	0.850139	842
CASP9	GW843682X	-0.0264413	0.804163	842
CASP9	Gefitinib	0.0455174	0.283777	842
CASP9	Gemcitabine	-0.0836924	0.0642427	842
CASP9	Genentech Cpd 10	0.0194176	0.636153	842
CASP9	HG-5-113-01	-0.060532	0.39488	842
CASP9	HG-5-88-01	-0.00873794	0.969685	842
CASP9	HG-6-64-1	-0.0306614	0.557675	842
CASP9	I-BET-762	-0.0542553	0.132073	842
CASP9	IOX2	0.00790303	0.919216	842
CASP9	IPA-3	-0.0435004	0.288756	842
CASP9	Imatinib	-0.0312119	0.860977	842
CASP9	Ispinesib Mesylate	-0.0738246	0.0447551	842
CASP9	JNJ-26854165	-5.668e-05	0.999311	842
CASP9	JNK Inhibitor VIII	0.0269004	0.559835	842
CASP9	JNK-9L	-0.036513	0.539476	842
CASP9	JQ1	-0.0428983	0.3273	842
CASP9	JQ12	-0.0756153	0.128894	842
CASP9	JW-7-24-1	-0.0235883	0.544216	842
CASP9	JW-7-52-1	-0.0472111	0.659482	842
CASP9	KIN001-055	-0.00857338	0.924731	842
CASP9	KIN001-102	-0.0359881	0.338942	842
CASP9	KIN001-135	0.0502575	0.644852	842
CASP9	KIN001-236	-0.0176519	0.668885	842
CASP9	KIN001-244	-0.0270198	0.496696	842
CASP9	KIN001-260	-0.100132	0.0052714	842
CASP9	KIN001-266	-0.00875446	0.880117	842
CASP9	KIN001-270	-0.0411342	0.315162	842
CASP9	KU-55933	-0.0837326	0.102589	842
CASP9	LAQ824	-0.0593704	0.138426	842
CASP9	LFM-A13	0.0421154	0.418748	842
CASP9	LY317615	0.019993	0.686802	842
CASP9	Lapatinib	0.0703483	0.274154	842
CASP9	Lenalidomide	0.000599869	0.996131	842
CASP9	Linifanib	-0.0256854	0.662149	842
CASP9	Lisitinib	-0.00947917	0.915748	842
CASP9	MG-132	0.0161683	0.890137	842
CASP9	MK-2206	-0.0360918	0.506458	842
CASP9	MLN4924	-0.0165693	0.803544	842
CASP9	MP470	-0.0211218	0.657092	842
CASP9	MPS-1-IN-1	-0.0335355	0.402893	842
CASP9	MS-275	-0.023562	0.81483	842
CASP9	Masitinib	-0.0306894	0.447391	842
CASP9	Methotrexate	-0.116278	0.00147649	842
CASP9	Midostaurin	0.0442793	0.334537	842
CASP9	Mitomycin C	-0.0746837	0.112426	842
CASP9	NG-25	-0.102665	0.00394516	842
CASP9	NPK76-II-72-1	-0.0587282	0.103473	842
CASP9	NSC-207895	-0.0490813	0.274959	842
CASP9	NSC-87877	0.0284688	0.641157	842
CASP9	NU-7441	-0.0548137	0.414947	842
CASP9	Navitoclax	0.0527079	0.170771	842
CASP9	Nilotinib	-0.0694799	0.147001	842
CASP9	Nutlin-3a (-)	0.0474553	0.32716	842
CASP9	OSI-027	-0.0310855	0.420356	842
CASP9	OSI-930	-0.0307813	0.459288	842
CASP9	OSU-03012	-0.0477151	0.336193	842
CASP9	Obatoclax Mesylate	-0.0492794	0.299738	842
CASP9	Olaparib	0.0793449	0.057828	842
CASP9	PAC-1	0.0156482	0.751704	842
CASP9	PD-0325901	0.0161284	0.720113	842
CASP9	PD-0332991	0.0808074	0.096972	842
CASP9	PD-173074	0.0108351	0.962231	842
CASP9	PF-4708671	-0.0408192	0.685857	842
CASP9	PF-562271	0.0376953	0.517109	842
CASP9	PFI-1	-0.0275501	0.604262	842
CASP9	PHA-665752	0.0214489	0.899959	842
CASP9	PHA-793887	-0.0971862	0.00571973	842
CASP9	PI-103	-0.03972	0.295109	842
CASP9	PIK-93	-0.025844	0.498236	842
CASP9	PLX4720	0.00900007	0.85269	842
CASP9	Paclitaxel	-0.0398416	0.74659	842
CASP9	Parthenolide	-0.0507112	0.636377	842
CASP9	Pazopanib	0.00265684	0.972501	842
CASP9	Phenformin	-0.147878	3.7293e-05	842
CASP9	Pyrimethamine	-0.0546018	0.64259	842
CASP9	QL-VIII-58	-0.0486923	0.545604	842
CASP9	QL-X-138	-0.0281917	0.475083	842
CASP9	QL-XI-92	-0.0421829	0.266266	842
CASP9	QL-XII-47	-0.0334555	0.430236	842
CASP9	QL-XII-61	-0.0257366	0.741997	842
CASP9	QS11	-0.0805624	0.143199	842
CASP9	RDEA119	0.0159931	0.701251	842
CASP9	RO-3306	0.0414824	0.339032	842
CASP9	Rapamycin	-0.060274	0.612114	842
CASP9	Roscovitine	-0.0220862	0.918092	842
CASP9	Ruxolitinib	-0.0366389	0.492241	842
CASP9	S-Trityl-L-cysteine	-0.048465	0.580563	842
CASP9	SB 216763	0.0803346	0.0911214	842
CASP9	SB 505124	0.00611396	0.957422	842
CASP9	SB52334	0.0656816	0.136501	842
CASP9	SB590885	0.00330794	0.954508	842
CASP9	SGC0946	0.0982972	0.0287522	842
CASP9	SL 0101-1	0.0676994	0.353462	842
CASP9	SN-38	-0.00459241	0.936353	842
CASP9	SNX-2112	-0.0662594	0.073019	842
CASP9	STF-62247	-0.0140283	0.76745	842
CASP9	Salubrinal	-0.044986	0.621627	842
CASP9	Saracatinib	-0.0122822	0.905167	842
CASP9	Shikonin	-0.0322363	0.573178	842
CASP9	Sorafenib	-0.0832408	0.390671	842
CASP9	Sunitinib	-0.114522	0.0912894	842
CASP9	T0901317	-0.0696697	0.0824786	842
CASP9	TAE684	0.0323404	0.811306	842
CASP9	TAK-715	-0.0423177	0.26536	842
CASP9	TG101348	-0.0134834	0.737348	842
CASP9	TGX221	0.0513732	0.448936	842
CASP9	THZ-2-102-1	-0.101706	0.00458367	842
CASP9	THZ-2-49	-0.11423	0.00156777	842
CASP9	TL-1-85	-0.106493	0.00285744	842
CASP9	TL-2-105	-0.0121626	0.773427	842
CASP9	TPCA-1	-0.0682871	0.0576136	842
CASP9	TW 37	-0.0668274	0.125379	842
CASP9	Talazoparib	0.0359969	0.447544	842
CASP9	Tamoxifen	-0.00896061	0.956255	842
CASP9	Temozolomide	-0.0300213	0.698258	842
CASP9	Temsirolimus	-0.0186598	0.749217	842
CASP9	Thapsigargin	-0.0354628	0.602675	842
CASP9	Tipifarnib	-0.0904885	0.0877003	842
CASP9	Tivozanib	-0.0294223	0.643815	842
CASP9	Trametinib	0.0224063	0.585591	842
CASP9	Tubastatin A	-0.0539468	0.141667	842
CASP9	UNC0638	-0.0392461	0.287155	842
CASP9	UNC1215	0.052283	0.292859	842
CASP9	VNLG/124	-0.025223	0.581678	842
CASP9	VX-11e	-0.0525137	0.262493	842
CASP9	VX-680	0.0170302	0.890915	842
CASP9	VX-702	0.0186497	0.940776	842
CASP9	Veliparib	0.0379945	0.590931	842
CASP9	Vinblastine	-0.0728263	0.0869885	842
CASP9	Vinorelbine	-0.107302	0.0218552	842
CASP9	Vorinostat	-0.103845	0.00449436	842
CASP9	WH-4-023	-0.0375642	0.662697	842
CASP9	WZ-1-84	0.00908055	0.925377	842
CASP9	WZ3105	-0.0352517	0.348716	842
CASP9	XAV939	-0.026045	0.535143	842
CASP9	XL-184	-0.0233658	0.656241	842
CASP9	XMD11-85h	-0.0191292	0.929229	842
CASP9	XMD13-2	-0.0211968	0.591842	842
CASP9	XMD14-99	-0.055711	0.150045	842
CASP9	XMD15-27	0.00285366	0.964165	842
CASP9	XMD8-85	-0.0169948	0.870934	842
CASP9	XMD8-92	0.0297474	0.808461	842
CASP9	Y-39983	-0.0123441	0.775276	842
CASP9	YK 4-279	-0.0401891	0.470885	842
[truncated: 6,034 more rows]
